# Supplementary material for: Long non-coding RNA, LINC01614 as a potential biomarker for prognostic prediction in breast cancer
Source: PeerJ. 2019 Nov 14;7:e7976. doi: 10.7717/peerj.7976 (PMC6858983; doi:10.7717/peerj.7976)
Supplement: Supplemental Information 4 [file peerj-07-7976-s004.xls]

## Sheet: supplementary table 1
	coef	se	z	p	HR	HRse	HRz	HRp	HRCILL	HRCIUL
"ENSG00000186594.8"	0.422	0.183	2.309	0.021	1.525	0.278	1.884	0.06	1.066	2.181
"ENSG00000203288.3"	0.385	0.182	2.116	0.034	1.469	0.267	1.757	0.079	1.029	2.099
"ENSG00000203499.6"	0.359	0.181	1.981	0.048	1.432	0.259	1.665	0.096	1.004	2.042
"ENSG00000203585.3"	0.446	0.182	2.445	0.015	1.562	0.285	1.972	0.049	1.092	2.233
"ENSG00000225541.1"	-0.532	0.183	-2.909	0.004	0.588	0.107	-3.84	0	0.411	0.841
"ENSG00000225889.3"	-0.372	0.181	-2.055	0.04	0.689	0.125	-2.489	0.013	0.483	0.983
"ENSG00000226026.1"	-0.481	0.185	-2.602	0.009	0.618	0.114	-3.341	0.001	0.431	0.888
"ENSG00000226031.1"	-0.369	0.184	-2.007	0.045	0.692	0.127	-2.427	0.015	0.483	0.991
"ENSG00000227964.1"	0.44	0.182	2.411	0.016	1.552	0.283	1.951	0.051	1.086	2.219
"ENSG00000228971.2"	-0.362	0.181	-1.994	0.046	0.696	0.126	-2.402	0.016	0.488	0.994
"ENSG00000229116.1"	-0.376	0.181	-2.074	0.038	0.687	0.124	-2.518	0.012	0.481	0.98
"ENSG00000230590.3"	0.469	0.184	2.556	0.011	1.599	0.293	2.04	0.041	1.116	2.291
"ENSG00000230747.1"	-0.465	0.181	-2.564	0.01	0.628	0.114	-3.265	0.001	0.44	0.896
"ENSG00000230838.1"	0.486	0.184	2.647	0.008	1.626	0.299	2.096	0.036	1.134	2.331
"ENSG00000231367.1"	-0.422	0.181	-2.334	0.02	0.656	0.119	-2.903	0.004	0.46	0.935
"ENSG00000231768.1"	-0.455	0.182	-2.494	0.013	0.634	0.116	-3.158	0.002	0.444	0.907
"ENSG00000231826.1"	-0.45	0.181	-2.484	0.013	0.637	0.116	-3.138	0.002	0.447	0.909
"ENSG00000231856.1"	-0.366	0.181	-2.023	0.043	0.694	0.125	-2.442	0.015	0.487	0.989
"ENSG00000231999.2"	-0.367	0.182	-2.012	0.044	0.693	0.126	-2.43	0.015	0.485	0.991
"ENSG00000232759.1"	-0.42	0.181	-2.322	0.02	0.657	0.119	-2.887	0.004	0.461	0.937
"ENSG00000232814.2"	-0.397	0.182	-2.186	0.029	0.672	0.122	-2.684	0.007	0.471	0.96
"ENSG00000233429.5"	-0.371	0.182	-2.042	0.041	0.69	0.125	-2.473	0.013	0.483	0.985
"ENSG00000233452.2"	0.454	0.183	2.477	0.013	1.574	0.288	1.992	0.046	1.099	2.253
"ENSG00000237248.3"	-0.512	0.183	-2.794	0.005	0.599	0.11	-3.649	0	0.419	0.858
"ENSG00000238198.1"	-0.358	0.18	-1.984	0.047	0.699	0.126	-2.386	0.017	0.491	0.996
"ENSG00000241158.2"	-0.48	0.185	-2.598	0.009	0.618	0.114	-3.335	0.001	0.43	0.889
"ENSG00000247970.2"	-0.519	0.182	-2.855	0.004	0.595	0.108	-3.743	0	0.417	0.85
"ENSG00000248309.1"	-0.43	0.182	-2.362	0.018	0.65	0.118	-2.952	0.003	0.455	0.929
"ENSG00000250132.2"	-0.389	0.181	-2.147	0.032	0.678	0.123	-2.625	0.009	0.475	0.967
"ENSG00000251442.1"	0.437	0.183	2.392	0.017	1.548	0.283	1.937	0.053	1.082	2.215
"ENSG00000251661.3"	-0.39	0.182	-2.141	0.032	0.677	0.123	-2.618	0.009	0.474	0.968
"ENSG00000254389.2"	0.393	0.184	2.136	0.033	1.481	0.273	1.766	0.077	1.033	2.125
"ENSG00000254862.1"	-0.566	0.181	-3.121	0.002	0.568	0.103	-4.198	0	0.398	0.81
"ENSG00000258443.1"	-0.365	0.181	-2.016	0.044	0.694	0.126	-2.434	0.015	0.487	0.99
"ENSG00000259244.1"	-0.436	0.182	-2.391	0.017	0.646	0.118	-2.998	0.003	0.452	0.924
"ENSG00000259577.1"	-0.479	0.183	-2.621	0.009	0.619	0.113	-3.362	0.001	0.433	0.886
"ENSG00000261372.1"	-0.43	0.183	-2.358	0.018	0.65	0.119	-2.947	0.003	0.455	0.93
"ENSG00000261468.1"	-0.376	0.185	-2.037	0.042	0.687	0.127	-2.473	0.013	0.478	0.986
"ENSG00000263586.1"	0.387	0.184	2.1	0.036	1.473	0.271	1.741	0.082	1.026	2.114
"ENSG00000265752.2"	-0.41	0.182	-2.248	0.025	0.664	0.121	-2.778	0.005	0.465	0.949
"ENSG00000267047.1"	-0.406	0.181	-2.242	0.025	0.666	0.121	-2.766	0.006	0.467	0.95
"ENSG00000267194.1"	-0.784	0.186	-4.206	0	0.457	0.085	-6.384	0	0.317	0.658
"ENSG00000267454.1"	-0.467	0.183	-2.549	0.011	0.627	0.115	-3.25	0.001	0.438	0.898
"ENSG00000267581.1"	0.392	0.184	2.134	0.033	1.48	0.272	1.765	0.078	1.032	2.121
"ENSG00000270030.1"	-0.362	0.181	-1.997	0.046	0.696	0.126	-2.407	0.016	0.488	0.993
"ENSG00000270223.1"	0.415	0.183	2.271	0.023	1.514	0.277	1.859	0.063	1.058	2.166
"ENSG00000271964.1"	-0.361	0.181	-1.999	0.046	0.697	0.126	-2.408	0.016	0.489	0.993
"ENSG00000272143.1"	-0.505	0.183	-2.764	0.006	0.603	0.11	-3.597	0	0.422	0.863
