# Supplementary material for: Long non-coding RNA, LINC01614 as a potential biomarker for prognostic prediction in breast cancer
Source: PeerJ. 2019 Nov 14;7:e7976. doi: 10.7717/peerj.7976 (PMC6858983; doi:10.7717/peerj.7976)
Supplement: Supplemental Information 5 [file peerj-07-7976-s005.xls]

## Sheet: full clinical information
	id	clin.sampleID	clin.OS.time	clin.OS	clin.age_at_initial_pathologic_diagnosis	clin.gender	clin.pathologic_M	clin.pathologic_N	clin.pathologic_stage	clin.pathologic_T	clin.ER_Status_nature2012	clin.PR_Status_nature2012	clin.HER2_Final_Status_nature2012	clin.additional_pharmaceutical_therapy	clin.lymph_node_examined_count	clin.number_of_lymphnodes_positive_by_he	ENSG00000230838.1	group.LNC	age	clin.PAM50_mRNA_nature2012	clin.PAM50Call_RNAseq
TCGA.A1.A0SK	TCGA.A1.A0SK	TCGA.A1.A0SK.01	967	1	54	FEMALE	M0	N0	II	T2	Negative	Negative	Negative	NA	4	0	4.80431	high	lager.50	Basal-like	Basal
TCGA.A1.A0SO	TCGA.A1.A0SO	TCGA.A1.A0SO.01	852	0	67	FEMALE	M0	N1	II	T2	Negative	Negative	Negative	NA	9	1	1.36212	low	lager.50	Basal-like	Basal
TCGA.A2.A04P	TCGA.A2.A04P	TCGA.A2.A04P.01	548	1	36	FEMALE	M0	N3	III	T2	Negative	Negative	Negative	YES	20	18	0.836213	low	less.50	Basal-like	Basal
TCGA.A2.A04Q	TCGA.A2.A04Q	TCGA.A2.A04Q.01	2385	0	48	FEMALE	M0	N0	I	T1	Negative	Negative	Negative	NA	3	0	2.40568	low	less.50	Basal-like	Basal
TCGA.A2.A04T	TCGA.A2.A04T	TCGA.A2.A04T.01	2246	0	62	FEMALE	M0	N0	II	T2	Negative	Negative	Negative	NA	3	0	1.14285	low	lager.50	Basal-like	Basal
TCGA.A2.A04U	TCGA.A2.A04U	TCGA.A2.A04U.01	2654	0	47	FEMALE	M0	N0	II	T2	Negative	Negative	Negative	NA	3	0	3.60636	low	less.50	Basal-like	Basal
TCGA.A2.A0CM	TCGA.A2.A0CM	TCGA.A2.A0CM.01	754	1	40	FEMALE	M0	N0	II	T2	Negative	Negative	Negative	YES	1	0	4.95019	high	less.50	Basal-like	Basal
TCGA.A2.A0D0	TCGA.A2.A0D0	TCGA.A2.A0D0.01	2048	0	60	FEMALE	M0	N0	II	T2	Negative	Negative	Negative	NA	8	0	0.223607	low	lager.50	Basal-like	Basal
TCGA.A2.A0D2	TCGA.A2.A0D2	TCGA.A2.A0D2.01	1027	0	45	FEMALE	M0	N0	II	T2	Negative	Negative	Negative	NA	5	0	6.02981	high	less.50	Basal-like	Basal
TCGA.A2.A0ST	TCGA.A2.A0ST	TCGA.A2.A0ST.01	3017	0	62	FEMALE	M0	N1	II	T1	Negative	Negative	Negative	NA	9	3	1.15702	low	lager.50	Basal-like	Basal
TCGA.A2.A0SX	TCGA.A2.A0SX	TCGA.A2.A0SX.01	1534	0	48	FEMALE	M0	N0	I	T1	Negative	Negative	Negative	YES	1	0	8.08165	high	less.50	Basal-like	Basal
TCGA.A2.A0T0	TCGA.A2.A0T0	TCGA.A2.A0T0.01	533	0	59	FEMALE	M0	N1	II	T2	Negative	Negative	Negative	NA	14	2	3.31361	low	lager.50	Basal-like	Basal
TCGA.A2.A0T2	TCGA.A2.A0T2	TCGA.A2.A0T2.01	255	1	66	FEMALE	M1	N3	IV	T3	Negative	Negative	Negative	NO	14	10	3.5587	low	lager.50	Basal-like	Basal
TCGA.A2.A0YE	TCGA.A2.A0YE	TCGA.A2.A0YE.01	554	0	48	FEMALE	M0	N1	II	T2	Negative	Negative	Negative	NA	19	1	1.7405	low	less.50	Basal-like	Basal
TCGA.A2.A0YJ	TCGA.A2.A0YJ	TCGA.A2.A0YJ.01	566	0	39	FEMALE	M0	N2	III	T3	Positive	Negative	Negative	NO	18	5	1.70845	low	less.50	Basal-like	Basal
TCGA.A2.A0YM	TCGA.A2.A0YM	TCGA.A2.A0YM.01	965	0	67	FEMALE	M0	N0	II	T2	Negative	Negative	Negative	NA	5	0	2.20537	low	lager.50	Basal-like	Basal
TCGA.A7.A0CE	TCGA.A7.A0CE	TCGA.A7.A0CE.01	1074	0	57	FEMALE	M0	N0	II	T2	Negative	Negative	Negative	NA	1	0	0.90639	low	lager.50	Basal-like	Basal
TCGA.A7.A0DA	TCGA.A7.A0DA	TCGA.A7.A0DA.01	1085	0	62	FEMALE	M0	N0	II	T2	Negative	Negative	Negative	NA	1	0	20.8606	high	lager.50	Basal-like	Basal
TCGA.A7.A13D	TCGA.A7.A13D	TCGA.A7.A13D.01	965	0	46	FEMALE	M0	N0	II	T2	Negative	Positive	Negative	NA	4	0	13.3126	high	less.50	Basal-like	Basal
TCGA.A7.A13E	TCGA.A7.A13E	TCGA.A7.A13E.01	614	1	62	FEMALE	NA	N1	II	T2	Positive	Negative	Negative	YES	12	2	8.25738	high	lager.50	Basal-like	Basal
TCGA.A8.A07C	TCGA.A8.A07C	TCGA.A8.A07C.01	1034	0	57	FEMALE	M0	N0	II	T2	Negative	Negative	Negative	NA	NA	NA	3.27909	low	lager.50	Basal-like	Basal
TCGA.A8.A07O	TCGA.A8.A07O	TCGA.A8.A07O.01	304	0	51	FEMALE	M0	N0	II	T2	Negative	Negative	Negative	NA	NA	NA	1.05037	low	lager.50	Basal-like	Basal
TCGA.A8.A07R	TCGA.A8.A07R	TCGA.A8.A07R.01	273	0	80	FEMALE	M0	N3	III	T2	Negative	Negative	NA	NA	NA	NA	1.14285	low	lager.50	Basal-like	Basal
TCGA.A8.A07U	TCGA.A8.A07U	TCGA.A8.A07U.01	760	0	66	FEMALE	M0	N2	III	T2	Negative	Positive	Negative	NA	NA	NA	2.58467	low	lager.50	Basal-like	Basal
TCGA.A8.A08R	TCGA.A8.A08R	TCGA.A8.A08R.01	30	0	52	FEMALE	M0	N1	II	T2	Negative	Negative	Negative	NA	NA	NA	3.05521	low	lager.50	Basal-like	Basal
TCGA.AN.A04D	TCGA.AN.A04D	TCGA.AN.A04D.01	52	0	58	FEMALE	M0	N1	II	T2	Negative	Negative	Negative	NA	15	2	0.413604	low	lager.50	Basal-like	Basal
TCGA.AN.A0AL	TCGA.AN.A0AL	TCGA.AN.A0AL.01	227	0	41	FEMALE	M0	N0	III	T4	Negative	Negative	Negative	NA	5	0	7.65908	high	less.50	Basal-like	Basal
TCGA.AN.A0AT	TCGA.AN.A0AT	TCGA.AN.A0AT.01	10	0	62	FEMALE	M0	N0	II	T2	Negative	Negative	Negative	NA	10	0	0.963036	low	lager.50	Basal-like	Basal
TCGA.AN.A0FJ	TCGA.AN.A0FJ	TCGA.AN.A0FJ.01	242	0	59	FEMALE	M1	N2	IV	T2	Positive	Negative	Negative	NA	14	8	1.00355	low	lager.50	Basal-like	Basal
TCGA.AN.A0FL	TCGA.AN.A0FL	TCGA.AN.A0FL.01	231	0	62	FEMALE	M0	N0	II	T2	Negative	Negative	Negative	NA	8	0	0.366347	low	lager.50	Basal-like	Basal
TCGA.AN.A0FX	TCGA.AN.A0FX	TCGA.AN.A0FX.01	10	0	52	FEMALE	M0	N0	II	T2	Negative	Negative	Negative	NA	12	0	6.16427	high	lager.50	Basal-like	Basal
TCGA.AN.A0G0	TCGA.AN.A0G0	TCGA.AN.A0G0.01	16	0	56	FEMALE	M0	N0	II	T2	Negative	Negative	Negative	NA	23	0	3.87815	low	lager.50	Basal-like	Basal
TCGA.AN.A0XU	TCGA.AN.A0XU	TCGA.AN.A0XU.01	10	0	54	FEMALE	M0	N0	II	T2	Negative	Negative	Negative	NA	16	0	2.91869	low	lager.50	Basal-like	Basal
TCGA.AO.A0J4	TCGA.AO.A0J4	TCGA.AO.A0J4.01	1587	0	41	FEMALE	M0	N0	I	T1	Negative	Negative	Negative	NA	4	0	6.85781	high	less.50	Basal-like	Basal
TCGA.AO.A0J6	TCGA.AO.A0J6	TCGA.AO.A0J6.01	1140	0	61	FEMALE	M0	N0	II	T2	Negative	Negative	Negative	NA	4	0	0.51974	low	lager.50	Basal-like	Basal
TCGA.AO.A0JL	TCGA.AO.A0JL	TCGA.AO.A0JL.01	1683	0	59	FEMALE	M0	N2	III	T2	Negative	Negative	Negative	NA	26	7	1.65954	low	lager.50	Basal-like	Basal
TCGA.AO.A124	TCGA.AO.A124	TCGA.AO.A124.01	3506	0	38	FEMALE	M0	N0	II	T2	Negative	Negative	Negative	NA	18	0	0.502616	low	less.50	Basal-like	Basal
TCGA.AO.A128	TCGA.AO.A128	TCGA.AO.A128.01	3248	0	61	FEMALE	M0	N0	II	T2	Negative	Negative	Negative	NA	15	0	3.61553	low	lager.50	Basal-like	Basal
TCGA.AO.A129	TCGA.AO.A129	TCGA.AO.A129.01	3286	0	29	FEMALE	M0	N1	II	T2	Negative	Negative	Negative	NA	21	2	0.981804	low	less.50	Basal-like	Basal
TCGA.AO.A12F	TCGA.AO.A12F	TCGA.AO.A12F.01	1842	0	36	FEMALE	M0	N0	II	T2	Negative	Negative	Negative	NA	17	0	6.1715	high	less.50	Basal-like	Basal
TCGA.AQ.A04J	TCGA.AQ.A04J	TCGA.AQ.A04J.01	819	0	45	FEMALE	M0	N0	II	T2	Negative	Negative	Negative	NA	20	0	1.60643	low	less.50	Basal-like	Basal
TCGA.AR.A0TP	TCGA.AR.A0TP	TCGA.AR.A0TP.01	4275	0	43	FEMALE	M0	N0	II	T2	Positive	Negative	Negative	NA	5	0	0.884911	low	less.50	Basal-like	Basal
TCGA.AR.A0TS	TCGA.AR.A0TS	TCGA.AR.A0TS.01	2558	0	46	FEMALE	M0	N1	II	T2	Negative	Negative	Negative	NA	16	2	1.49115	low	less.50	Basal-like	Basal
TCGA.AR.A0TU	TCGA.AR.A0TU	TCGA.AR.A0TU.01	709	0	35	FEMALE	M0	N0	II	T2	Negative	Negative	Negative	NA	4	0	0.558842	low	less.50	Basal-like	Basal
TCGA.AR.A0U0	TCGA.AR.A0U0	TCGA.AR.A0U0.01	1988	0	73	FEMALE	M0	N1	II	T2	Negative	Negative	Negative	NA	4	0	3.36963	low	lager.50	Basal-like	Basal
TCGA.AR.A0U1	TCGA.AR.A0U1	TCGA.AR.A0U1.01	4052	0	36	FEMALE	M0	N1	II	T2	Negative	Negative	Negative	NA	31	1	0.938623	low	less.50	Basal-like	Basal
TCGA.AR.A0U4	TCGA.AR.A0U4	TCGA.AR.A0U4.01	3261	0	54	FEMALE	M0	N0	II	T2	Negative	Negative	Negative	NA	10	0	3.40695	low	lager.50	Basal-like	Basal
TCGA.AR.A1AH	TCGA.AR.A1AH	TCGA.AR.A1AH.01	3807	0	51	FEMALE	M0	N1	II	T2	Positive	Negative	Negative	NA	9	1	9.31921	high	lager.50	Basal-like	Basal
TCGA.AR.A1AI	TCGA.AR.A1AI	TCGA.AR.A1AI.01	3296	0	47	FEMALE	M0	N0	II	T2	Negative	Negative	Negative	NA	5	0	0.831968	low	less.50	Basal-like	Basal
TCGA.AR.A1AJ	TCGA.AR.A1AJ	TCGA.AR.A1AJ.01	3072	0	83	FEMALE	M0	N0	I	T1	Positive	Negative	Negative	NA	8	0	5.64386	high	lager.50	Basal-like	Basal
TCGA.AR.A1AQ	TCGA.AR.A1AQ	TCGA.AR.A1AQ.01	3021	0	49	FEMALE	M0	N0	II	T2	Negative	Negative	Negative	NA	6	0	2.04816	low	less.50	Basal-like	Basal
TCGA.AR.A1AR	TCGA.AR.A1AR	TCGA.AR.A1AR.01	524	1	50	FEMALE	M0	N2	III	T1	Negative	Negative	Negative	NA	14	5	3.59856	low	lager.50	Basal-like	Basal
TCGA.AR.A1AY	TCGA.AR.A1AY	TCGA.AR.A1AY.01	1026	0	65	FEMALE	M0	N0	I	T1	Negative	Negative	Negative	NA	4	0	3.48309	low	lager.50	Basal-like	Basal
TCGA.B6.A0I2	TCGA.B6.A0I2	TCGA.B6.A0I2.01	4361	0	45	FEMALE	M0	N0	I	T1	NA	NA	Negative	NA	8	0	0.150916	low	less.50	Basal-like	Basal
TCGA.B6.A0I6	TCGA.B6.A0I6	TCGA.B6.A0I6.01	991	1	49	FEMALE	M0	N1	II	T1	Negative	Negative	NA	NO	32	6	7.9845	high	less.50	Basal-like	Basal
TCGA.B6.A0IJ	TCGA.B6.A0IJ	TCGA.B6.A0IJ.01	7106	0	42	FEMALE	M0	N0	II	T3	Positive	Positive	Negative	NA	27	0	0.363048	low	less.50	Basal-like	Basal
TCGA.B6.A0IQ	TCGA.B6.A0IQ	TCGA.B6.A0IQ.01	4285	0	40	FEMALE	M0	N1	III	T3	Negative	Negative	Negative	NA	26	1	0.720792	low	less.50	Basal-like	Basal
TCGA.B6.A0RE	TCGA.B6.A0RE	TCGA.B6.A0RE.01	7777	0	61	FEMALE	M0	N0	NA	NA	Negative	Negative	Negative	NA	14	0	3.81967	low	lager.50	Basal-like	Basal
TCGA.B6.A0RT	TCGA.B6.A0RT	TCGA.B6.A0RT.01	2721	0	39	FEMALE	M0	N1	III	T3	Negative	Negative	Negative	NA	23	1	0.973899	low	less.50	Basal-like	Basal
TCGA.B6.A0RU	TCGA.B6.A0RU	TCGA.B6.A0RU.01	8605	0	40	FEMALE	M0	N0	I	T1	Negative	Negative	Negative	NA	15	0	1.69611	low	less.50	Basal-like	Basal
TCGA.B6.A0WX	TCGA.B6.A0WX	TCGA.B6.A0WX.01	639	1	40	FEMALE	M0	N1	III	T3	Negative	Negative	Negative	NO	21	9	4.25597	low	less.50	Basal-like	Basal
TCGA.B6.A0X1	TCGA.B6.A0X1	TCGA.B6.A0X1.01	7455	1	48	FEMALE	M1	N1	II	T2	Negative	Negative	NA	YES	21	16	0.965332	low	less.50	Basal-like	Basal
TCGA.BH.A0AV	TCGA.BH.A0AV	TCGA.BH.A0AV.01	1820	0	52	FEMALE	M0	N0	I	T1	Negative	Negative	Negative	NA	2	0	20.0922	high	lager.50	Basal-like	Basal
TCGA.BH.A0B3	TCGA.BH.A0B3	TCGA.BH.A0B3.01	1203	0	53	FEMALE	M0	N1	II	T2	Negative	Negative	Negative	NA	29	2	4.68527	low	lager.50	Basal-like	Basal
TCGA.BH.A0BG	TCGA.BH.A0BG	TCGA.BH.A0BG.01	1871	0	73	FEMALE	M0	N0	I	T1	Negative	Negative	Negative	NA	1	0	3.30186	low	lager.50	Basal-like	Basal
TCGA.BH.A0BL	TCGA.BH.A0BL	TCGA.BH.A0BL.01	2278	0	35	FEMALE	M0	N0	I	T1	Negative	Negative	Negative	NA	2	0	9.49643	high	less.50	Basal-like	Basal
TCGA.BH.A0BW	TCGA.BH.A0BW	TCGA.BH.A0BW.01	2371	0	71	FEMALE	M0	N0	I	T1	Negative	Negative	Negative	NA	8	0	7.41389	high	lager.50	Basal-like	Basal
TCGA.BH.A0DL	TCGA.BH.A0DL	TCGA.BH.A0DL.01	2381	0	64	FEMALE	M0	N0	II	T2	Positive	Negative	Negative	NA	3	0	2.89069	low	lager.50	Basal-like	Basal
TCGA.BH.A0E0	TCGA.BH.A0E0	TCGA.BH.A0E0.01	134	0	38	FEMALE	M0	N3	III	T3	Negative	Negative	Negative	NA	21	10	0.469745	low	less.50	Basal-like	Basal
TCGA.BH.A0E6	TCGA.BH.A0E6	TCGA.BH.A0E6.01	293	0	69	FEMALE	M0	N0	I	T1	Negative	Negative	Negative	NA	1	0	0.589454	low	lager.50	Basal-like	Basal
TCGA.BH.A0RX	TCGA.BH.A0RX	TCGA.BH.A0RX.01	170	0	59	FEMALE	M0	N0	II	T2	Negative	Negative	Negative	NA	3	0	3.06614	low	lager.50	Basal-like	Basal
TCGA.BH.A0WA	TCGA.BH.A0WA	TCGA.BH.A0WA.01	701	0	82	FEMALE	M0	N0	I	T1	Negative	Negative	Negative	NA	3	0	2.89096	low	lager.50	Basal-like	Basal
TCGA.BH.A18G	TCGA.BH.A18G	TCGA.BH.A18G.01	149	0	81	FEMALE	M0	N0	I	T1	Negative	Negative	Negative	NA	3	0	9.92931	high	lager.50	Basal-like	Basal
TCGA.BH.A18K	TCGA.BH.A18K	TCGA.BH.A18K.01	2763	1	46	FEMALE	M0	N0	I	T1	Positive	Positive	Negative	NA	11	0	10.682	high	less.50	Basal-like	LumA
TCGA.BH.A18Q	TCGA.BH.A18Q	TCGA.BH.A18Q.01	1692	1	56	FEMALE	M0	N1	II	T2	Negative	Negative	Negative	NA	25	2	0.760497	low	lager.50	Basal-like	Basal
TCGA.BH.A18V	TCGA.BH.A18V	TCGA.BH.A18V.01	1556	1	48	FEMALE	M0	N1	II	T2	Negative	Negative	Negative	NA	25	0	3.95811	low	less.50	Basal-like	Basal
TCGA.BH.A1F0	TCGA.BH.A1F0	TCGA.BH.A1F0.01	785	1	80	FEMALE	M0	N1	II	T1	Negative	NA	Negative	NA	9	1	3.41928	low	lager.50	Basal-like	Basal
TCGA.C8.A12V	TCGA.C8.A12V	TCGA.C8.A12V.01	385	0	55	FEMALE	M0	N0	II	T2	Negative	Negative	Negative	NA	5	0	0.782221	low	lager.50	Basal-like	Basal
TCGA.C8.A131	TCGA.C8.A131	TCGA.C8.A131.01	411	0	82	FEMALE	M0	N2	III	T2	Negative	Negative	Negative	NA	8	4	5.7594	high	lager.50	Basal-like	Basal
TCGA.C8.A134	TCGA.C8.A134	TCGA.C8.A134.01	383	0	52	FEMALE	M0	N0	II	T2	Negative	Negative	Negative	NA	7	NA	1.09731	low	lager.50	Basal-like	Basal
TCGA.D8.A142	TCGA.D8.A142	TCGA.D8.A142.01	425	0	74	FEMALE	M0	N0	II	T3	Negative	Negative	Negative	NA	14	0	13.2893	high	lager.50	Basal-like	Basal
TCGA.D8.A143	TCGA.D8.A143	TCGA.D8.A143.01	431	0	51	FEMALE	M0	N0	II	T2	Negative	Negative	Negative	NA	11	0	1.14182	low	lager.50	Basal-like	Basal
TCGA.D8.A147	TCGA.D8.A147	TCGA.D8.A147.01	584	0	45	FEMALE	M0	N0	NA	T2	Negative	Negative	Negative	NA	1	0	1.84393	low	less.50	Basal-like	Basal
TCGA.E2.A14N	TCGA.E2.A14N	TCGA.E2.A14N.01	1434	0	37	FEMALE	M0	N1	II	T2	Negative	Negative	Negative	NA	38	1	1.60205	low	less.50	Basal-like	Basal
TCGA.E2.A14R	TCGA.E2.A14R	TCGA.E2.A14R.01	1174	0	62	FEMALE	M0	N0	II	T2	Negative	Negative	Negative	NO	8	0	1.75041	low	lager.50	Basal-like	Basal
TCGA.E2.A14X	TCGA.E2.A14X	TCGA.E2.A14X.01	972	0	55	FEMALE	M0	N2	III	T2	Negative	Negative	Negative	NA	21	5	0.723288	low	lager.50	Basal-like	Basal
TCGA.E2.A14Y	TCGA.E2.A14Y	TCGA.E2.A14Y.01	2109	0	35	FEMALE	M0	N0	II	T2	Positive	Positive	Positive	NA	5	0	3.66106	low	less.50	Basal-like	Basal
TCGA.E2.A150	TCGA.E2.A150	TCGA.E2.A150.01	1935	0	48	FEMALE	M0	N0	II	T2	Negative	Negative	Negative	NA	2	0	2.93739	low	less.50	Basal-like	Basal
TCGA.E2.A158	TCGA.E2.A158	TCGA.E2.A158.01	450	0	43	FEMALE	M0	N1	II	T1	Negative	Negative	Negative	NA	2	1	0.840478	low	less.50	Basal-like	Basal
TCGA.E2.A159	TCGA.E2.A159	TCGA.E2.A159.01	762	0	50	FEMALE	M0	N0	II	T2	Negative	Negative	Negative	NA	4	0	5.71106	high	lager.50	Basal-like	Basal
TCGA.E2.A1AZ	TCGA.E2.A1AZ	TCGA.E2.A1AZ.01	2329	0	63	FEMALE	M0	N1	II	T2	Negative	Negative	Negative	NA	3	1	4.48118	low	lager.50	Basal-like	Basal
TCGA.E2.A1B5	TCGA.E2.A1B5	TCGA.E2.A1B5.01	984	0	46	FEMALE	M0	N0	II	T2	Positive	Positive	Negative	NA	5	0	0.527959	low	less.50	Basal-like	LumA
TCGA.A2.A04W	TCGA.A2.A04W	TCGA.A2.A04W.01	3102	0	50	FEMALE	M0	N1	II	T2	Negative	Negative	Positive	NA	19	1	5.11473	high	lager.50	HER2-enriched	Her2
TCGA.A2.A04X	TCGA.A2.A04X	TCGA.A2.A04X.01	1686	0	34	FEMALE	M0	N0	II	T2	Positive	Positive	Positive	NA	3	0	1.63354	low	less.50	HER2-enriched	Her2
TCGA.A2.A0CL	TCGA.A2.A0CL	TCGA.A2.A0CL.01	3015	0	37	FEMALE	M0	N2	III	T3	Positive	Positive	Negative	NA	14	9	4.71365	low	less.50	HER2-enriched	Normal
TCGA.A2.A0CX	TCGA.A2.A0CX	TCGA.A2.A0CX.01	1728	0	52	FEMALE	M0	N0	II	T2	Positive	Negative	Positive	NA	2	0	10.8781	high	lager.50	HER2-enriched	Her2
TCGA.A2.A0D1	TCGA.A2.A0D1	TCGA.A2.A0D1.01	1051	0	76	FEMALE	M0	N0	II	T2	Negative	Negative	Positive	NA	2	0	2.25333	low	lager.50	HER2-enriched	Her2
TCGA.A2.A0EQ	TCGA.A2.A0EQ	TCGA.A2.A0EQ.01	2426	0	64	FEMALE	M0	N0	II	T2	Negative	Negative	Positive	NA	2	0	0.694542	low	lager.50	HER2-enriched	Her2
TCGA.A2.A0T1	TCGA.A2.A0T1	TCGA.A2.A0T1.01	521	0	55	FEMALE	M0	N3	III	T3	Negative	Negative	Positive	NA	10	10	13.391	high	lager.50	HER2-enriched	Her2
TCGA.A8.A075	TCGA.A8.A075	TCGA.A8.A075.01	518	0	42	FEMALE	M0	N1	II	T2	Positive	Positive	Negative	NA	NA	NA	6.95437	high	less.50	HER2-enriched	LumB
TCGA.A8.A076	TCGA.A8.A076	TCGA.A8.A076.01	1642	0	66	FEMALE	M0	N0	II	T2	Positive	Positive	Positive	NA	NA	NA	14.6846	high	lager.50	HER2-enriched	LumB
TCGA.A8.A07B	TCGA.A8.A07B	TCGA.A8.A07B.01	1308	0	69	FEMALE	M0	N0	II	T2	Positive	Positive	Positive	NA	NA	NA	11.8113	high	lager.50	HER2-enriched	LumA
TCGA.A8.A07I	TCGA.A8.A07I	TCGA.A8.A07I.01	426	0	69	FEMALE	M0	N2	III	T2	Positive	Negative	Positive	NA	NA	NA	20.4923	high	lager.50	HER2-enriched	Her2
TCGA.A8.A08B	TCGA.A8.A08B	TCGA.A8.A08B.01	1156	0	52	FEMALE	M0	N0	II	T2	Positive	Negative	Positive	NA	NA	NA	2.29043	low	lager.50	HER2-enriched	Her2
TCGA.A8.A08J	TCGA.A8.A08J	TCGA.A8.A08J.01	1127	1	52	FEMALE	M1	N3	IV	T4	Positive	Negative	Negative	NA	NA	NA	11.2702	high	lager.50	HER2-enriched	Her2
TCGA.A8.A08L	TCGA.A8.A08L	TCGA.A8.A08L.01	304	1	89	FEMALE	M0	N2	III	T3	Positive	Negative	Negative	NA	NA	NA	5.49564	high	lager.50	HER2-enriched	Her2
TCGA.A8.A08X	TCGA.A8.A08X	TCGA.A8.A08X.01	1308	0	43	FEMALE	M0	N3	III	T4	Negative	Negative	Positive	NA	NA	NA	8.21824	high	less.50	HER2-enriched	Her2
TCGA.A8.A092	TCGA.A8.A092	TCGA.A8.A092.01	942	0	48	FEMALE	M0	N2	III	T2	Positive	Positive	Negative	NA	NA	NA	3.97903	low	less.50	HER2-enriched	LumB
TCGA.A8.A09X	TCGA.A8.A09X	TCGA.A8.A09X.01	426	1	62	FEMALE	M0	N3	III	T2	Negative	Negative	Negative	NA	NA	NA	6.46426	high	lager.50	HER2-enriched	Her2
TCGA.A8.A0A7	TCGA.A8.A0A7	TCGA.A8.A0A7.01	30	0	57	FEMALE	M0	N1	II	T2	Negative	Negative	Positive	NA	NA	NA	4.16729	low	lager.50	HER2-enriched	Her2
TCGA.AN.A04C	TCGA.AN.A04C	TCGA.AN.A04C.01	54	0	51	FEMALE	M0	N1	II	T2	Negative	Negative	Positive	NA	15	2	1.61401	low	lager.50	HER2-enriched	Her2
TCGA.AN.A0FV	TCGA.AN.A0FV	TCGA.AN.A0FV.01	10	0	58	FEMALE	M0	N0	II	T2	Negative	Negative	Positive	NA	12	0	11.3759	high	lager.50	HER2-enriched	Her2
TCGA.AO.A03L	TCGA.AO.A03L	TCGA.AO.A03L.01	2442	0	34	FEMALE	M0	N2	III	T3	Positive	Positive	Negative	NA	17	4	8.35951	high	less.50	HER2-enriched	LumA
TCGA.AO.A03N	TCGA.AO.A03N	TCGA.AO.A03N.01	2031	0	59	FEMALE	M0	N1	II	T2	Positive	Positive	Negative	YES	19	2	3.7257	low	lager.50	HER2-enriched	LumB
TCGA.AO.A0J2	TCGA.AO.A0J2	TCGA.AO.A0J2.01	997	0	41	FEMALE	M0	N0	I	T1	Negative	Negative	Negative	NA	5	0	2.72709	low	less.50	HER2-enriched	Her2
TCGA.AO.A0JE	TCGA.AO.A0JE	TCGA.AO.A0JE.01	2335	0	53	FEMALE	M0	N2	III	T2	Negative	Negative	Positive	NA	29	8	9.53421	high	lager.50	HER2-enriched	Her2
TCGA.AO.A12D	TCGA.AO.A12D	TCGA.AO.A12D.01	2515	0	43	FEMALE	M0	N1	II	T1	Negative	Negative	Positive	NA	16	1	9.04317	high	less.50	HER2-enriched	Her2
TCGA.AR.A0TX	TCGA.AR.A0TX	TCGA.AR.A0TX.01	1972	0	64	FEMALE	M0	N1	II	T1	Positive	Positive	Positive	NA	25	3	6.74956	high	lager.50	HER2-enriched	Her2
TCGA.B6.A0I9	TCGA.B6.A0I9	TCGA.B6.A0I9.01	362	1	62	FEMALE	M1	NA	IV	T3	NA	Positive	Positive	NA	NA	NA	3.60694	low	lager.50	HER2-enriched	Her2
TCGA.B6.A0IK	TCGA.B6.A0IK	TCGA.B6.A0IK.01	571	1	63	FEMALE	M0	N1	III	T4	Negative	Negative	Negative	YES	14	1	4.54653	low	lager.50	HER2-enriched	Her2
TCGA.B6.A0RH	TCGA.B6.A0RH	TCGA.B6.A0RH.01	6456	1	51	FEMALE	M0	N0	II	T2	Positive	Positive	Positive	YES	23	0	2.7219	low	lager.50	HER2-enriched	Her2
TCGA.B6.A0RS	TCGA.B6.A0RS	TCGA.B6.A0RS.01	3063	1	38	FEMALE	M0	N0	II	T2	Negative	Negative	Negative	YES	15	0	2.31299	low	less.50	HER2-enriched	Her2
TCGA.BH.A0AW	TCGA.BH.A0AW	TCGA.BH.A0AW.01	622	0	56	FEMALE	M0	N1	II	T1	Positive	Negative	Positive	NA	12	2	3.41046	low	lager.50	HER2-enriched	Her2
TCGA.BH.A0B7	TCGA.BH.A0B7	TCGA.BH.A0B7.01	2559	0	42	FEMALE	M0	N1	II	T2	Positive	Positive	Positive	NA	17	1	6.07448	high	less.50	HER2-enriched	Her2
TCGA.BH.A0DZ	TCGA.BH.A0DZ	TCGA.BH.A0DZ.01	495	0	43	FEMALE	M0	N1	II	T2	Positive	Positive	Positive	NA	5	1	13.87	high	less.50	HER2-enriched	LumA
TCGA.BH.A0EE	TCGA.BH.A0EE	TCGA.BH.A0EE.01	943	0	68	FEMALE	M0	N0	II	T3	Negative	Negative	Positive	NO	1	0	0.169535	low	lager.50	HER2-enriched	Her2
TCGA.BH.A0HY	TCGA.BH.A0HY	TCGA.BH.A0HY.01	1545	0	60	FEMALE	M0	N0	I	T1	Positive	Negative	NA	NA	3	0	12.3743	high	lager.50	HER2-enriched	LumB
TCGA.BH.A18P	TCGA.BH.A18P	TCGA.BH.A18P.01	921	1	60	FEMALE	M0	N0	I	T1	Positive	Negative	Negative	NA	2	0	11.7393	high	lager.50	HER2-enriched	Her2
TCGA.BH.A18R	TCGA.BH.A18R	TCGA.BH.A18R.01	1142	1	50	FEMALE	M0	N1	II	T2	NA	Negative	Positive	NA	15	10	5.95847	high	lager.50	HER2-enriched	Her2
TCGA.BH.A1EV	TCGA.BH.A1EV	TCGA.BH.A1EV.01	365	1	45	FEMALE	M0	N1	III	T3	Positive	Positive	NA	NA	10	3	11.6579	high	less.50	HER2-enriched	Her2
TCGA.C8.A12L	TCGA.C8.A12L	TCGA.C8.A12L.01	363	0	67	FEMALE	M0	N0	II	T2	Negative	Negative	Positive	NA	3	NA	2.01633	low	lager.50	HER2-enriched	Her2
TCGA.C8.A12P	TCGA.C8.A12P	TCGA.C8.A12P.01	358	0	55	FEMALE	M0	N1	II	T2	Negative	Negative	Positive	NA	8	NA	6.43227	high	lager.50	HER2-enriched	Her2
TCGA.C8.A12Q	TCGA.C8.A12Q	TCGA.C8.A12Q.01	385	1	78	FEMALE	M0	N2	III	T1	Negative	Negative	Positive	NA	7	NA	4.11764	low	lager.50	HER2-enriched	Her2
TCGA.C8.A12Z	TCGA.C8.A12Z	TCGA.C8.A12Z.01	382	0	45	FEMALE	M0	N1	II	T2	Negative	Negative	Positive	NA	2	2	6.81584	high	less.50	HER2-enriched	Her2
TCGA.C8.A130	TCGA.C8.A130	TCGA.C8.A130.01	370	0	52	FEMALE	M0	N2	III	T3	Positive	Positive	NA	NA	8	NA	4.54361	low	lager.50	HER2-enriched	LumB
TCGA.C8.A135	TCGA.C8.A135	TCGA.C8.A135.01	393	0	64	FEMALE	M0	N1	II	T2	Negative	Negative	Positive	NA	3	1	5.8917	high	lager.50	HER2-enriched	Her2
TCGA.C8.A137	TCGA.C8.A137	TCGA.C8.A137.01	379	0	34	FEMALE	M0	N1	II	T2	Negative	Negative	Positive	NO	2	NA	9.48393	high	less.50	HER2-enriched	Her2
TCGA.C8.A138	TCGA.C8.A138	TCGA.C8.A138.01	380	0	54	FEMALE	M0	N2	III	T2	Positive	Negative	Positive	NA	2	NA	4.61876	low	lager.50	HER2-enriched	Her2
TCGA.C8.A1HF	TCGA.C8.A1HF	TCGA.C8.A1HF.01	332	0	48	FEMALE	M0	N0	II	T2	Negative	Positive	Positive	NA	12	NA	4.1685	low	less.50	HER2-enriched	Her2
TCGA.D8.A13Z	TCGA.D8.A13Z	TCGA.D8.A13Z.01	635	0	51	FEMALE	M0	N2	NA	T2	Negative	Negative	Negative	NA	11	9	4.35191	low	lager.50	HER2-enriched	Her2
TCGA.E2.A14P	TCGA.E2.A14P	TCGA.E2.A14P.01	1246	0	79	FEMALE	M0	N3	III	T2	Negative	Negative	Positive	NA	24	10	2.68496	low	lager.50	HER2-enriched	Her2
TCGA.E2.A14V	TCGA.E2.A14V	TCGA.E2.A14V.01	1042	0	53	FEMALE	M0	N1	II	T2	Positive	Positive	Positive	NA	24	3	3.69381	low	lager.50	HER2-enriched	Her2
TCGA.E2.A152	TCGA.E2.A152	TCGA.E2.A152.01	2128	0	56	FEMALE	M0	N0	I	T1	Positive	Negative	Positive	NO	3	0	17.6733	high	lager.50	HER2-enriched	Her2
TCGA.E2.A1B0	TCGA.E2.A1B0	TCGA.E2.A1B0.01	1631	0	50	FEMALE	M0	N2	III	T2	Negative	Negative	Positive	NA	28	6	14.2352	high	lager.50	HER2-enriched	Her2
TCGA.A1.A0SD	TCGA.A1.A0SD	TCGA.A1.A0SD.01	437	0	59	FEMALE	M0	N0	II	T2	Positive	Positive	Negative	NA	3	0	6.93752	high	lager.50	Luminal A	LumA
TCGA.A1.A0SE	TCGA.A1.A0SE	TCGA.A1.A0SE.01	1321	0	56	FEMALE	M0	N0	I	T1	Positive	Positive	Negative	NA	8	0	5.36431	high	lager.50	Luminal A	LumA
TCGA.A1.A0SH	TCGA.A1.A0SH	TCGA.A1.A0SH.01	1437	0	39	FEMALE	M0	N0	II	T2	Negative	Positive	Negative	NA	2	0	15.7189	high	less.50	Luminal A	LumA
TCGA.A1.A0SJ	TCGA.A1.A0SJ	TCGA.A1.A0SJ.01	416	0	39	FEMALE	M0	N1	III	T3	Positive	Positive	Negative	NA	19	3	3.89928	low	less.50	Luminal A	LumA
TCGA.A2.A04N	TCGA.A2.A04N	TCGA.A2.A04N.01	4354	0	66	FEMALE	M0	N0	I	T1	Positive	Positive	Negative	NA	6	0	9.65933	high	lager.50	Luminal A	LumA
TCGA.A2.A04V	TCGA.A2.A04V	TCGA.A2.A04V.01	1920	1	39	FEMALE	M0	N0	II	T2	Positive	Positive	Negative	YES	2	0	9.51086	high	less.50	Luminal A	LumA
TCGA.A2.A04Y	TCGA.A2.A04Y	TCGA.A2.A04Y.01	1099	0	53	FEMALE	M0	N1	II	T2	Positive	Positive	Negative	NA	13	1	1.65234	low	lager.50	Luminal A	LumB
TCGA.A2.A0CP	TCGA.A2.A0CP	TCGA.A2.A0CP.01	2813	0	60	FEMALE	M0	N0	I	T1	Positive	Positive	Negative	NA	2	0	9.30105	high	lager.50	Luminal A	LumA
TCGA.A2.A0CQ	TCGA.A2.A0CQ	TCGA.A2.A0CQ.01	2695	0	62	FEMALE	M0	N0	I	T1	Positive	Positive	Negative	NA	1	0	0.683791	low	lager.50	Luminal A	LumA
TCGA.A2.A0CS	TCGA.A2.A0CS	TCGA.A2.A0CS.01	2348	1	73	FEMALE	M1	N3	IV	T4	Positive	Positive	Negative	NA	15	12	5.35028	high	lager.50	Luminal A	LumA
TCGA.A2.A0CU	TCGA.A2.A0CU	TCGA.A2.A0CU.01	158	1	73	FEMALE	M0	N0	II	T2	Positive	Positive	Negative	NA	1	0	2.14698	low	lager.50	Luminal A	LumA
TCGA.A2.A0CV	TCGA.A2.A0CV	TCGA.A2.A0CV.01	3011	0	41	FEMALE	M0	N1	II	T2	Positive	Positive	Negative	NA	18	4	2.33166	low	less.50	Luminal A	LumA
TCGA.A2.A0CZ	TCGA.A2.A0CZ	TCGA.A2.A0CZ.01	1616	0	46	FEMALE	M0	N0	II	T2	Positive	Positive	Negative	NA	2	0	11.1164	high	less.50	Luminal A	Normal
TCGA.A2.A0D3	TCGA.A2.A0D3	TCGA.A2.A0D3.01	1873	0	42	FEMALE	M0	N0	I	T1	Positive	Positive	Negative	NA	1	0	2.51968	low	less.50	Luminal A	LumA
TCGA.A2.A0EM	TCGA.A2.A0EM	TCGA.A2.A0EM.01	3094	0	73	FEMALE	M0	N0	I	T1	Positive	Positive	Negative	NA	1	0	8.04999	high	lager.50	Luminal A	LumA
TCGA.A2.A0EN	TCGA.A2.A0EN	TCGA.A2.A0EN.01	2718	0	70	FEMALE	M0	N0	II	T2	Positive	Positive	Negative	NA	4	0	4.55775	low	lager.50	Luminal A	LumA
TCGA.A2.A0EO	TCGA.A2.A0EO	TCGA.A2.A0EO.01	2442	0	54	FEMALE	M0	N0	I	T1	Positive	Positive	Negative	NA	3	0	6.40287	high	lager.50	Luminal A	LumA
TCGA.A2.A0ES	TCGA.A2.A0ES	TCGA.A2.A0ES.01	2190	0	52	FEMALE	M0	N0	II	T2	Positive	Positive	Negative	NA	1	0	2.35831	low	lager.50	Luminal A	LumA
TCGA.A2.A0ET	TCGA.A2.A0ET	TCGA.A2.A0ET.01	1066	0	58	FEMALE	M0	N2	III	T2	Positive	Positive	Negative	NA	15	5	0.777076	low	lager.50	Luminal A	LumA
TCGA.A2.A0EU	TCGA.A2.A0EU	TCGA.A2.A0EU.01	1043	0	79	FEMALE	M0	N0	I	T1	Positive	Positive	Negative	NA	1	0	8.24158	high	lager.50	Luminal A	LumA
TCGA.A2.A0EV	TCGA.A2.A0EV	TCGA.A2.A0EV.01	968	0	80	FEMALE	M0	N0	I	T1	Positive	Positive	Negative	NA	6	0	8.23159	high	lager.50	Luminal A	LumA
TCGA.A2.A0EW	TCGA.A2.A0EW	TCGA.A2.A0EW.01	1884	1	53	FEMALE	M0	N3	III	T1	Positive	Positive	Negative	YES	NA	26	5.95163	high	lager.50	Luminal A	LumA
TCGA.A2.A0EX	TCGA.A2.A0EX	TCGA.A2.A0EX.01	752	0	46	FEMALE	M0	N0	II	T3	Positive	Positive	Negative	NO	1	0	3.27886	low	less.50	Luminal A	LumA
TCGA.A2.A0SU	TCGA.A2.A0SU	TCGA.A2.A0SU.01	1662	0	66	FEMALE	M0	N0	II	T2	Positive	Positive	Negative	NA	7	0	4.80884	high	lager.50	Luminal A	LumA
TCGA.A2.A0SY	TCGA.A2.A0SY	TCGA.A2.A0SY.01	1347	0	62	FEMALE	M0	N1	III	T3	Positive	Positive	Positive	NA	14	1	4.09806	low	lager.50	Luminal A	LumA
TCGA.A2.A0T5	TCGA.A2.A0T5	TCGA.A2.A0T5.01	531	0	39	FEMALE	M0	N0	II	T2	Positive	Positive	Negative	NA	4	0	2.54799	low	less.50	Luminal A	LumA
TCGA.A2.A0T6	TCGA.A2.A0T6	TCGA.A2.A0T6.01	575	0	50	FEMALE	M0	N0	II	T3	Positive	Positive	Negative	NA	3	0	13.8705	high	lager.50	Luminal A	LumA
TCGA.A2.A0T7	TCGA.A2.A0T7	TCGA.A2.A0T7.01	631	0	51	FEMALE	M0	N0	II	T2	Positive	Positive	Negative	NA	2	0	5.58308	high	lager.50	Luminal A	LumA
TCGA.A2.A0YC	TCGA.A2.A0YC	TCGA.A2.A0YC.01	990	0	59	FEMALE	M0	N1	II	T2	Positive	Positive	Negative	YES	3	1	4.00761	low	lager.50	Luminal A	LumA
TCGA.A2.A0YD	TCGA.A2.A0YD	TCGA.A2.A0YD.01	769	0	63	FEMALE	M0	N0	II	T3	Positive	Positive	Negative	NA	2	0	12.3376	high	lager.50	Luminal A	LumA
TCGA.A2.A0YF	TCGA.A2.A0YF	TCGA.A2.A0YF.01	1535	0	67	FEMALE	M0	N0	I	T1	Positive	Negative	Negative	NA	1	0	1.76313	low	lager.50	Luminal A	LumA
TCGA.A2.A0YI	TCGA.A2.A0YI	TCGA.A2.A0YI.01	1505	0	62	FEMALE	M0	N0	I	T1	Positive	Positive	Negative	NA	3	0	3.39842	low	lager.50	Luminal A	LumA
TCGA.A2.A0YL	TCGA.A2.A0YL	TCGA.A2.A0YL.01	1474	0	48	FEMALE	M0	N2	III	T3	Positive	Positive	Negative	NA	29	4	4.24186	low	less.50	Luminal A	LumA
TCGA.A7.A0CD	TCGA.A7.A0CD	TCGA.A7.A0CD.01	1165	0	66	FEMALE	M0	N0	I	T1	Positive	Positive	Negative	NA	2	0	2.52851	low	lager.50	Luminal A	LumA
TCGA.A7.A0CG	TCGA.A7.A0CG	TCGA.A7.A0CG.01	1043	0	78	FEMALE	M0	N0	II	T2	Positive	Negative	Negative	NA	5	0	2.48445	low	lager.50	Luminal A	LumA
TCGA.A7.A0CH	TCGA.A7.A0CH	TCGA.A7.A0CH.01	1079	0	79	FEMALE	M0	N0	II	T2	NA	NA	Negative	NA	2	0	7.71397	high	lager.50	Luminal A	LumA
TCGA.A7.A0D9	TCGA.A7.A0D9	TCGA.A7.A0D9.01	1139	0	37	FEMALE	M0	N0	II	T2	Positive	Negative	Negative	NA	1	0	18.7427	high	less.50	Luminal A	LumA
TCGA.A7.A0DB	TCGA.A7.A0DB	TCGA.A7.A0DB.01	1007	0	56	FEMALE	M0	N0	II	T2	Positive	Positive	Negative	NA	4	0	3.56089	low	lager.50	Luminal A	LumA
TCGA.A8.A06P	TCGA.A8.A06P	TCGA.A8.A06P.01	396	0	63	FEMALE	M0	N2	III	T1	Positive	Positive	Negative	NA	NA	NA	10.7498	high	lager.50	Luminal A	LumA
TCGA.A8.A06T	TCGA.A8.A06T	TCGA.A8.A06T.01	1614	0	75	FEMALE	M0	N1	III	T3	Positive	Positive	Negative	NA	NA	NA	4.18314	low	lager.50	Luminal A	LumA
TCGA.A8.A06U	TCGA.A8.A06U	TCGA.A8.A06U.01	883	1	80	FEMALE	M0	N1	II	T2	Positive	Positive	NA	NA	NA	NA	6.11267	high	lager.50	Luminal A	LumA
TCGA.A8.A06Y	TCGA.A8.A06Y	TCGA.A8.A06Y.01	791	0	66	FEMALE	M0	N0	II	T2	Positive	Positive	Negative	NA	NA	NA	5.70711	high	lager.50	Luminal A	LumA
TCGA.A8.A07E	TCGA.A8.A07E	TCGA.A8.A07E.01	608	0	81	FEMALE	NA	N3	NA	T4	Positive	Positive	Negative	NA	NA	NA	12.3677	high	lager.50	Luminal A	LumA
TCGA.A8.A07F	TCGA.A8.A07F	TCGA.A8.A07F.01	577	0	65	FEMALE	M0	N1	II	T2	Positive	Positive	Negative	NA	NA	NA	4.40252	low	lager.50	Luminal A	LumA
TCGA.A8.A07G	TCGA.A8.A07G	TCGA.A8.A07G.01	577	0	65	FEMALE	M0	N1	II	T1	Positive	Positive	Negative	NA	NA	NA	9.63416	high	lager.50	Luminal A	LumA
TCGA.A8.A07J	TCGA.A8.A07J	TCGA.A8.A07J.01	365	0	35	FEMALE	M0	N1	II	T2	Positive	Positive	Negative	NA	NA	NA	10.1804	high	less.50	Luminal A	LumA
TCGA.A8.A07P	TCGA.A8.A07P	TCGA.A8.A07P.01	334	0	68	FEMALE	M0	N1	II	T2	Positive	Positive	Positive	NA	NA	NA	9.2519	high	lager.50	Luminal A	LumA
TCGA.A8.A086	TCGA.A8.A086	TCGA.A8.A086.01	396	0	59	FEMALE	M0	N1	II	T1	Positive	Positive	Negative	NA	NA	NA	8.59026	high	lager.50	Luminal A	LumA
TCGA.A8.A08C	TCGA.A8.A08C	TCGA.A8.A08C.01	881	0	65	FEMALE	M0	N0	II	T2	Positive	Positive	Negative	NA	NA	NA	4.86288	high	lager.50	Luminal A	LumA
TCGA.A8.A08O	TCGA.A8.A08O	TCGA.A8.A08O.01	943	0	45	FEMALE	M1	N3	IV	T2	Positive	Positive	Negative	NA	NA	NA	6.014	high	less.50	Luminal A	LumA
TCGA.A8.A08T	TCGA.A8.A08T	TCGA.A8.A08T.01	3409	1	64	FEMALE	M1	N1	IV	T2	Positive	Positive	Negative	NA	NA	NA	7.18097	high	lager.50	Luminal A	LumA
TCGA.A8.A08Z	TCGA.A8.A08Z	TCGA.A8.A08Z.01	1217	0	76	FEMALE	M0	N3	NA	T4	Positive	Positive	Negative	NA	NA	NA	15.3207	high	lager.50	Luminal A	LumA
TCGA.A8.A091	TCGA.A8.A091	TCGA.A8.A091.01	1004	0	61	FEMALE	M0	N0	II	T2	Positive	Negative	Negative	NA	NA	NA	3.15614	low	lager.50	Luminal A	LumA
TCGA.A8.A093	TCGA.A8.A093	TCGA.A8.A093.01	546	0	61	FEMALE	M0	N0	II	T2	Positive	Positive	Negative	NA	NA	NA	7.07932	high	lager.50	Luminal A	LumA
TCGA.A8.A099	TCGA.A8.A099	TCGA.A8.A099.01	304	0	76	FEMALE	NA	N3	NA	T4	Positive	Positive	Positive	NA	NA	NA	9.33209	high	lager.50	Luminal A	LumA
TCGA.A8.A09A	TCGA.A8.A09A	TCGA.A8.A09A.01	304	0	40	FEMALE	M0	NA	NA	T2	Positive	Positive	Negative	NA	NA	NA	9.75544	high	less.50	Luminal A	LumA
TCGA.A8.A09B	TCGA.A8.A09B	TCGA.A8.A09B.01	365	0	58	FEMALE	M0	N1	III	T4	Positive	Positive	Negative	NA	NA	NA	4.37734	low	lager.50	Luminal A	LumA
TCGA.A8.A09T	TCGA.A8.A09T	TCGA.A8.A09T.01	579	0	68	FEMALE	NA	N0	NA	T1	Positive	Positive	Negative	NA	NA	NA	11.2531	high	lager.50	Luminal A	LumA
TCGA.A8.A09V	TCGA.A8.A09V	TCGA.A8.A09V.01	457	0	51	FEMALE	M0	N0	II	T2	Positive	Positive	Negative	NA	NA	NA	5.41769	high	lager.50	Luminal A	LumA
TCGA.A8.A0A1	TCGA.A8.A0A1	TCGA.A8.A0A1.01	365	0	84	FEMALE	M0	N0	II	T2	Positive	Positive	Negative	NA	NA	NA	15.9484	high	lager.50	Luminal A	LumA
TCGA.A8.A0A2	TCGA.A8.A0A2	TCGA.A8.A0A2.01	579	0	66	FEMALE	M0	N0	II	T2	Positive	Positive	Negative	NA	NA	NA	4.46166	low	lager.50	Luminal A	LumA
TCGA.A8.A0A4	TCGA.A8.A0A4	TCGA.A8.A0A4.01	396	0	73	FEMALE	M0	N0	II	T2	Positive	Positive	Negative	NA	NA	NA	0.0687423	low	lager.50	Luminal A	LumA
TCGA.A8.A0A6	TCGA.A8.A0A6	TCGA.A8.A0A6.01	640	0	64	FEMALE	M0	N3	III	T2	Positive	Positive	Negative	NA	NA	NA	5.77412	high	lager.50	Luminal A	LumA
TCGA.A8.A0AD	TCGA.A8.A0AD	TCGA.A8.A0AD.01	1157	0	83	FEMALE	M0	N0	I	T1	Positive	Positive	Negative	NA	NA	NA	26.4115	high	lager.50	Luminal A	LumA
TCGA.AN.A03X	TCGA.AN.A03X	TCGA.AN.A03X.01	10	0	74	FEMALE	M0	N0	II	T2	Positive	Positive	Negative	NA	19	0	33.5656	high	lager.50	Luminal A	LumA
TCGA.AN.A046	TCGA.AN.A046	TCGA.AN.A046.01	10	0	68	FEMALE	M0	N0	II	T2	Positive	Positive	Negative	NA	19	0	7.94638	high	lager.50	Luminal A	LumA
TCGA.AN.A04A	TCGA.AN.A04A	TCGA.AN.A04A.01	90	0	36	FEMALE	M0	N2	III	T2	Positive	Positive	Negative	NA	7	4	8.72191	high	less.50	Luminal A	LumA
TCGA.AN.A0FD	TCGA.AN.A0FD	TCGA.AN.A0FD.01	196	0	71	FEMALE	M0	N0	II	T2	Positive	Positive	Positive	NA	14	0	5.93431	high	lager.50	Luminal A	LumA
TCGA.AN.A0FN	TCGA.AN.A0FN	TCGA.AN.A0FN.01	218	0	61	FEMALE	M0	N0	I	T1	Positive	Positive	Negative	NA	10	0	22.4431	high	lager.50	Luminal A	LumA
TCGA.AN.A0FS	TCGA.AN.A0FS	TCGA.AN.A0FS.01	210	0	55	FEMALE	M0	N0	I	T1	Positive	Negative	Negative	NA	14	0	3.20463	low	lager.50	Luminal A	LumA
TCGA.AN.A0FT	TCGA.AN.A0FT	TCGA.AN.A0FT.01	214	0	63	FEMALE	M0	N1	II	T2	Positive	Positive	Positive	NA	7	1	1.47604	low	lager.50	Luminal A	LumA
TCGA.AN.A0FW	TCGA.AN.A0FW	TCGA.AN.A0FW.01	11	0	67	FEMALE	M0	N2	III	T2	Positive	NA	Negative	NA	14	2	4.43535	low	lager.50	Luminal A	LumA
TCGA.AN.A0FZ	TCGA.AN.A0FZ	TCGA.AN.A0FZ.01	10	0	45	FEMALE	M0	N2	III	T2	Positive	Negative	NA	NA	14	1	8.35556	high	less.50	Luminal A	LumA
TCGA.AN.A0XL	TCGA.AN.A0XL	TCGA.AN.A0XL.01	163	0	61	FEMALE	M0	N0	II	T2	Positive	Positive	Negative	NA	14	0	2.91906	low	lager.50	Luminal A	LumA
TCGA.AN.A0XN	TCGA.AN.A0XN	TCGA.AN.A0XN.01	10	0	68	FEMALE	M0	N2	III	T2	Negative	Positive	Negative	NA	15	1	67.3589	high	lager.50	Luminal A	LumA
TCGA.AN.A0XO	TCGA.AN.A0XO	TCGA.AN.A0XO.01	375	0	59	FEMALE	M0	N2	III	T2	Positive	Negative	Negative	NA	12	2	6.25065	high	lager.50	Luminal A	LumA
TCGA.AN.A0XP	TCGA.AN.A0XP	TCGA.AN.A0XP.01	9	0	69	FEMALE	M0	N2	III	T2	Positive	Positive	Negative	NA	19	1	5.88802	high	lager.50	Luminal A	LumA
TCGA.AN.A0XS	TCGA.AN.A0XS	TCGA.AN.A0XS.01	10	0	63	FEMALE	M0	N2	III	T2	Negative	Positive	Negative	NA	11	1	7.48805	high	lager.50	Luminal A	LumA
TCGA.AN.A0XT	TCGA.AN.A0XT	TCGA.AN.A0XT.01	10	0	54	FEMALE	M0	N2	III	T2	Positive	Negative	Negative	NA	17	1	0.834355	low	lager.50	Luminal A	LumA
TCGA.AN.A0XV	TCGA.AN.A0XV	TCGA.AN.A0XV.01	162	0	67	FEMALE	M0	N2	III	T2	Positive	Positive	Negative	NA	16	7	6.34167	high	lager.50	Luminal A	LumA
TCGA.AO.A03M	TCGA.AO.A03M	TCGA.AO.A03M.01	1866	0	29	FEMALE	M0	N0	I	T1	Positive	Positive	Negative	NA	2	0	3.99465	low	less.50	Luminal A	LumA
TCGA.AO.A03V	TCGA.AO.A03V	TCGA.AO.A03V.01	1351	0	41	FEMALE	M0	N0	I	T1	Positive	Positive	Negative	NA	2	0	6.33374	high	less.50	Luminal A	LumA
TCGA.AO.A0J8	TCGA.AO.A0J8	TCGA.AO.A0J8.01	680	0	61	FEMALE	M0	N0	II	T2	Positive	Positive	Negative	NA	2	0	8.57608	high	lager.50	Luminal A	LumA
TCGA.AO.A0J9	TCGA.AO.A0J9	TCGA.AO.A0J9.01	1613	0	61	FEMALE	M0	N3	III	T2	Positive	Positive	Negative	YES	32	15	2.38028	low	lager.50	Luminal A	LumA
TCGA.AO.A0JA	TCGA.AO.A0JA	TCGA.AO.A0JA.01	655	0	36	FEMALE	M0	N3	III	T2	Positive	Positive	Negative	YES	11	11	12.1282	high	less.50	Luminal A	LumA
TCGA.AO.A0JF	TCGA.AO.A0JF	TCGA.AO.A0JF.01	1980	0	68	FEMALE	M0	N1	II	T1	Positive	Positive	Negative	NA	14	2	8.31547	high	lager.50	Luminal A	LumA
TCGA.AO.A0JG	TCGA.AO.A0JG	TCGA.AO.A0JG.01	798	0	49	FEMALE	M0	N2	III	T2	Positive	Positive	Negative	NA	19	4	1.94412	low	less.50	Luminal A	LumA
TCGA.AO.A0JJ	TCGA.AO.A0JJ	TCGA.AO.A0JJ.01	1887	0	54	FEMALE	M0	N1	II	T2	Positive	Positive	Negative	NA	44	2	2.60404	low	lager.50	Luminal A	LumA
TCGA.AO.A125	TCGA.AO.A125	TCGA.AO.A125.01	3456	0	72	FEMALE	M0	N0	II	T2	Positive	Positive	Negative	NA	5	0	0.0186386	low	lager.50	Luminal A	LumA
TCGA.AO.A126	TCGA.AO.A126	TCGA.AO.A126.01	3307	0	39	FEMALE	M0	N0	II	T2	Positive	Positive	Negative	NO	5	0	2.29082	low	less.50	Luminal A	LumA
TCGA.AO.A12A	TCGA.AO.A12A	TCGA.AO.A12A.01	3112	0	47	FEMALE	M0	N0	II	T2	Positive	Positive	Negative	NA	27	0	5.77637	high	less.50	Luminal A	LumA
TCGA.AO.A12C	TCGA.AO.A12C	TCGA.AO.A12C.01	2372	0	42	FEMALE	M0	N1	II	T2	Positive	Positive	Positive	NA	31	2	10.3619	high	less.50	Luminal A	LumA
TCGA.AO.A12E	TCGA.AO.A12E	TCGA.AO.A12E.01	2142	0	51	FEMALE	M0	N0	II	T3	Positive	Positive	Negative	NA	13	0	2.63911	low	lager.50	Luminal A	LumA
TCGA.AO.A12G	TCGA.AO.A12G	TCGA.AO.A12G.01	1639	0	75	FEMALE	M0	N0	II	T2	Positive	Positive	Negative	NA	4	0	3.97346	low	lager.50	Luminal A	LumA
TCGA.AO.A12H	TCGA.AO.A12H	TCGA.AO.A12H.01	1234	0	69	FEMALE	M0	N0	II	T2	Positive	Positive	Negative	NA	10	0	1.17169	low	lager.50	Luminal A	LumA
TCGA.AQ.A04L	TCGA.AQ.A04L	TCGA.AQ.A04L.01	3957	0	48	FEMALE	NA	N0	II	T2	Positive	Negative	Positive	NA	2	0	6.51123	high	less.50	Luminal A	LumA
TCGA.AR.A0TR	TCGA.AR.A0TR	TCGA.AR.A0TR.01	160	1	68	FEMALE	M0	N1	II	T2	Positive	Positive	Negative	NA	27	1	0.049613	low	lager.50	Luminal A	LumA
TCGA.AR.A0TW	TCGA.AR.A0TW	TCGA.AR.A0TW.01	3009	0	50	FEMALE	M0	N1	III	T3	Positive	Positive	Negative	NA	27	3	9.02139	high	lager.50	Luminal A	LumA
TCGA.AR.A1AK	TCGA.AR.A1AK	TCGA.AR.A1AK.01	3159	0	70	FEMALE	M0	N0	I	T1	Positive	Positive	Negative	NA	5	0	1.64399	low	lager.50	Luminal A	LumA
TCGA.AR.A1AL	TCGA.AR.A1AL	TCGA.AR.A1AL.01	2971	0	60	FEMALE	M0	N1	III	T3	Positive	Positive	Negative	NA	15	3	4.92355	high	lager.50	Luminal A	LumA
TCGA.AR.A1AN	TCGA.AR.A1AN	TCGA.AR.A1AN.01	2920	0	46	FEMALE	M0	N0	II	T2	Positive	Positive	Negative	NA	5	0	12.6549	high	less.50	Luminal A	LumA
TCGA.AR.A1AP	TCGA.AR.A1AP	TCGA.AR.A1AP.01	2856	0	80	FEMALE	M0	N0	I	T1	Positive	Positive	Negative	NA	1	0	10.3592	high	lager.50	Luminal A	LumA
TCGA.AR.A1AS	TCGA.AR.A1AS	TCGA.AR.A1AS.01	1150	0	54	FEMALE	M0	N1	II	T2	Positive	Positive	Negative	NA	17	1	5.11188	high	lager.50	Luminal A	LumA
TCGA.AR.A1AU	TCGA.AR.A1AU	TCGA.AR.A1AU.01	2868	0	39	FEMALE	M0	N2	III	T2	Positive	Positive	Negative	NA	37	4	5.17126	high	less.50	Luminal A	LumA
TCGA.AR.A1AW	TCGA.AR.A1AW	TCGA.AR.A1AW.01	2632	0	65	FEMALE	M0	N0	II	T2	Positive	Positive	Negative	NA	1	0	4.05214	low	lager.50	Luminal A	LumB
TCGA.AR.A1AX	TCGA.AR.A1AX	TCGA.AR.A1AX.01	2629	0	64	FEMALE	M0	N0	I	T1	Positive	Positive	Positive	NA	8	0	1.89786	low	lager.50	Luminal A	LumA
TCGA.B6.A0I5	TCGA.B6.A0I5	TCGA.B6.A0I5.01	8556	0	49	FEMALE	M0	N1	II	T2	Positive	Positive	Negative	NA	13	5	1.27525	low	less.50	Luminal A	LumA
TCGA.B6.A0I8	TCGA.B6.A0I8	TCGA.B6.A0I8.01	749	1	46	FEMALE	M0	NA	NA	T1	NA	NA	NA	YES	0	NA	3.40802	low	less.50	Luminal A	LumA
TCGA.B6.A0IA	TCGA.B6.A0IA	TCGA.B6.A0IA.01	8391	0	51	FEMALE	M0	N0	II	T2	Positive	Positive	Negative	NA	15	0	0.61831	low	lager.50	Luminal A	LumA
TCGA.B6.A0IG	TCGA.B6.A0IG	TCGA.B6.A0IG.01	4456	1	50	FEMALE	M0	N1	II	T2	Positive	Positive	NA	NA	16	4	3.10883	low	lager.50	Luminal A	LumA
TCGA.B6.A0IH	TCGA.B6.A0IH	TCGA.B6.A0IH.01	3418	1	81	FEMALE	M0	N1	III	T3	Positive	Positive	Negative	NA	27	25	0.877958	low	lager.50	Luminal A	LumA
TCGA.B6.A0IN	TCGA.B6.A0IN	TCGA.B6.A0IN.01	2573	1	45	FEMALE	NA	NA	NA	T1	Positive	Negative	NA	YES	NA	NA	1.30206	low	less.50	Luminal A	LumB
TCGA.B6.A0IO	TCGA.B6.A0IO	TCGA.B6.A0IO.01	5042	0	66	FEMALE	M0	N0	II	T2	Positive	NA	Negative	NA	17	0	1.14307	low	lager.50	Luminal A	LumA
TCGA.B6.A0IP	TCGA.B6.A0IP	TCGA.B6.A0IP.01	3926	1	74	FEMALE	M0	N0	I	T1	Positive	Positive	Negative	NA	16	0	2.29043	low	lager.50	Luminal A	LumA
TCGA.B6.A0RG	TCGA.B6.A0RG	TCGA.B6.A0RG.01	2082	0	26	FEMALE	M0	N0	II	T3	Negative	Negative	Negative	NA	19	0	4.77909	high	less.50	Luminal A	LumA
TCGA.B6.A0RI	TCGA.B6.A0RI	TCGA.B6.A0RI.01	7126	0	44	FEMALE	M0	N1	III	T4	Positive	Positive	Negative	YES	15	6	22.5371	high	less.50	Luminal A	LumA
TCGA.B6.A0RM	TCGA.B6.A0RM	TCGA.B6.A0RM.01	2373	1	57	FEMALE	NA	NA	NA	NA	Positive	Positive	Negative	NA	0	NA	0.917863	low	lager.50	Luminal A	LumA
TCGA.B6.A0RN	TCGA.B6.A0RN	TCGA.B6.A0RN.01	8008	0	60	FEMALE	M0	N0	I	T1	Negative	Negative	Negative	NA	19	0	7.57973	high	lager.50	Luminal A	LumA
TCGA.B6.A0RO	TCGA.B6.A0RO	TCGA.B6.A0RO.01	4929	0	71	FEMALE	M0	N1	III	T4	Positive	Positive	Negative	NA	17	2	1.2198	low	lager.50	Luminal A	LumA
TCGA.B6.A0RP	TCGA.B6.A0RP	TCGA.B6.A0RP.01	3126	1	73	FEMALE	M0	N1	NA	T2	Positive	Positive	Negative	YES	15	2	13.4056	high	lager.50	Luminal A	LumA
TCGA.B6.A0RQ	TCGA.B6.A0RQ	TCGA.B6.A0RQ.01	4267	1	68	FEMALE	M0	N0	II	T3	Positive	Positive	Negative	NA	14	0	0.0613544	low	lager.50	Luminal A	Normal
TCGA.B6.A0RV	TCGA.B6.A0RV	TCGA.B6.A0RV.01	5156	0	42	FEMALE	M0	N2	III	T3	Positive	Positive	Negative	NA	10	5	0.996671	low	less.50	Luminal A	LumA
TCGA.B6.A0WS	TCGA.B6.A0WS	TCGA.B6.A0WS.01	2965	1	58	FEMALE	NA	NA	NA	T1	Positive	Positive	Negative	NA	NA	NA	4.15193	low	lager.50	Luminal A	LumA
TCGA.B6.A0WT	TCGA.B6.A0WT	TCGA.B6.A0WT.01	5739	0	61	FEMALE	M0	N1	II	T2	Positive	Positive	Negative	YES	15	1	19.733	high	lager.50	Luminal A	LumA
TCGA.B6.A0WY	TCGA.B6.A0WY	TCGA.B6.A0WY.01	3461	1	40	FEMALE	M0	N1	III	T3	Positive	Negative	Negative	YES	21	3	2.07093	low	less.50	Luminal A	LumA
TCGA.B6.A0WZ	TCGA.B6.A0WZ	TCGA.B6.A0WZ.01	6292	0	50	FEMALE	M0	N1	II	T2	Positive	Positive	Negative	NA	21	11	3.82483	low	lager.50	Luminal A	LumA
TCGA.B6.A0X0	TCGA.B6.A0X0	TCGA.B6.A0X0.01	3945	1	54	FEMALE	M0	N0	I	T1	Positive	Positive	Negative	NA	31	0	1.5178	low	lager.50	Luminal A	LumA
TCGA.B6.A0X4	TCGA.B6.A0X4	TCGA.B6.A0X4.01	860	1	62	FEMALE	M0	N1	II	T2	Positive	Positive	Negative	YES	21	2	2.66605	low	lager.50	Luminal A	LumA
TCGA.B6.A0X7	TCGA.B6.A0X7	TCGA.B6.A0X7.01	1781	1	62	FEMALE	NA	NA	NA	T1	Positive	Positive	Negative	NO	0	NA	2.69593	low	lager.50	Luminal A	LumA
TCGA.BH.A0AZ	TCGA.BH.A0AZ	TCGA.BH.A0AZ.01	1919	0	47	FEMALE	NA	N1	III	T3	Positive	Positive	Negative	NA	13	1	22.9099	high	less.50	Luminal A	LumA
TCGA.BH.A0B0	TCGA.BH.A0B0	TCGA.BH.A0B0.01	2477	0	56	FEMALE	M0	N0	I	T1	Positive	Positive	Negative	NA	2	0	10.3523	high	lager.50	Luminal A	LumA
TCGA.BH.A0B1	TCGA.BH.A0B1	TCGA.BH.A0B1.01	1148	0	66	FEMALE	M0	N1	II	T2	Positive	Positive	Negative	NA	15	1	5.40891	high	lager.50	Luminal A	LumA
TCGA.BH.A0B4	TCGA.BH.A0B4	TCGA.BH.A0B4.01	1191	0	65	MALE	M0	N2	III	T2	Positive	Positive	Positive	NA	10	6	6.62058	high	lager.50	Luminal A	LumA
TCGA.BH.A0B8	TCGA.BH.A0B8	TCGA.BH.A0B8.01	1569	0	64	FEMALE	M0	N0	I	T1	Positive	Positive	Negative	NA	2	0	6.14643	high	lager.50	Luminal A	LumA
TCGA.BH.A0BA	TCGA.BH.A0BA	TCGA.BH.A0BA.01	1132	0	51	FEMALE	M0	N3	III	T3	Positive	Positive	Negative	NA	27	27	2.1502	low	lager.50	Luminal A	LumA
TCGA.BH.A0BC	TCGA.BH.A0BC	TCGA.BH.A0BC.01	974	0	60	FEMALE	M0	N3	III	T2	Positive	Positive	Negative	NA	18	12	4.59074	low	lager.50	Luminal A	LumA
TCGA.BH.A0BJ	TCGA.BH.A0BJ	TCGA.BH.A0BJ.01	660	0	41	FEMALE	M0	N1	II	T2	Positive	Positive	Negative	NA	18	2	5.44824	high	less.50	Luminal A	LumA
TCGA.BH.A0BM	TCGA.BH.A0BM	TCGA.BH.A0BM.01	1876	0	54	FEMALE	M0	N1	II	T2	Positive	Negative	Negative	NA	24	3	1.47967	low	lager.50	Luminal A	LumA
TCGA.BH.A0BO	TCGA.BH.A0BO	TCGA.BH.A0BO.01	2197	0	54	FEMALE	M0	N0	I	T1	Positive	Positive	Negative	NA	3	0	4.12022	low	lager.50	Luminal A	LumA
TCGA.BH.A0BP	TCGA.BH.A0BP	TCGA.BH.A0BP.01	2296	1	76	FEMALE	M0	N0	I	T1	Positive	Positive	Negative	NA	3	0	5.0488	high	lager.50	Luminal A	LumA
TCGA.BH.A0BQ	TCGA.BH.A0BQ	TCGA.BH.A0BQ.01	2255	0	39	FEMALE	M0	N0	I	T1	Positive	Positive	Negative	NA	2	0	9.20694	high	less.50	Luminal A	LumA
TCGA.BH.A0BR	TCGA.BH.A0BR	TCGA.BH.A0BR.01	2330	0	59	FEMALE	M0	N0	I	T1	Positive	Positive	Negative	NA	3	0	9.56567	high	lager.50	Luminal A	LumA
TCGA.BH.A0BS	TCGA.BH.A0BS	TCGA.BH.A0BS.01	2612	0	55	FEMALE	M0	N1	III	T3	Positive	Positive	Negative	NA	11	0	2.6886	low	lager.50	Luminal A	LumA
TCGA.BH.A0BT	TCGA.BH.A0BT	TCGA.BH.A0BT.01	2365	0	56	FEMALE	M0	N1	II	T1	Positive	Positive	Negative	NA	NA	NA	3.26704	low	lager.50	Luminal A	LumA
TCGA.BH.A0BV	TCGA.BH.A0BV	TCGA.BH.A0BV.01	1519	0	78	FEMALE	M0	N1	II	T2	Positive	Positive	Negative	NA	25	2	9.3685	high	lager.50	Luminal A	LumA
TCGA.BH.A0C1	TCGA.BH.A0C1	TCGA.BH.A0C1.01	1411	1	61	FEMALE	M0	N2	III	T3	Positive	Positive	Negative	NA	10	8	16.6871	high	lager.50	Luminal A	LumA
TCGA.BH.A0DE	TCGA.BH.A0DE	TCGA.BH.A0DE.01	2372	0	62	FEMALE	M0	N0	II	T2	Positive	Positive	Negative	NA	2	0	7.17503	high	lager.50	Luminal A	LumA
TCGA.BH.A0DG	TCGA.BH.A0DG	TCGA.BH.A0DG.01	2041	0	30	FEMALE	M0	N0	II	T2	Positive	Negative	Negative	NA	3	0	7.2646	high	less.50	Luminal A	LumA
TCGA.BH.A0DH	TCGA.BH.A0DH	TCGA.BH.A0DH.01	1156	0	63	FEMALE	M0	N1	II	T2	Positive	Positive	Negative	NA	28	3	2.18737	low	lager.50	Luminal A	LumA
TCGA.BH.A0DI	TCGA.BH.A0DI	TCGA.BH.A0DI.01	912	0	63	FEMALE	M0	N1	II	T2	Positive	Positive	Negative	NA	28	3	6.7447	high	lager.50	Luminal A	LumA
TCGA.BH.A0DK	TCGA.BH.A0DK	TCGA.BH.A0DK.01	423	0	49	FEMALE	M0	N0	II	T2	Positive	Positive	Negative	NA	3	0	10.6637	high	less.50	Luminal A	LumA
TCGA.BH.A0DO	TCGA.BH.A0DO	TCGA.BH.A0DO.01	1644	0	78	FEMALE	M0	N0	I	T1	Positive	Positive	Negative	NA	2	0	0.781925	low	lager.50	Luminal A	LumA
TCGA.BH.A0DP	TCGA.BH.A0DP	TCGA.BH.A0DP.01	476	0	60	FEMALE	M0	N0	II	T3	Positive	Positive	Negative	NA	4	0	6.23609	high	lager.50	Luminal A	LumA
TCGA.BH.A0DQ	TCGA.BH.A0DQ	TCGA.BH.A0DQ.01	98	0	42	FEMALE	M0	N1	II	T2	Positive	Positive	Negative	NA	25	1	10.0483	high	less.50	Luminal A	LumA
TCGA.BH.A0DS	TCGA.BH.A0DS	TCGA.BH.A0DS.01	78	0	71	FEMALE	M0	N2	III	T2	Positive	Positive	Negative	NA	14	8	3.72182	low	lager.50	Luminal A	LumA
TCGA.BH.A0DT	TCGA.BH.A0DT	TCGA.BH.A0DT.01	2403	0	41	FEMALE	M0	N1	II	T1	Positive	Positive	Negative	NA	18	1	3.85448	low	less.50	Luminal A	LumA
TCGA.BH.A0DX	TCGA.BH.A0DX	TCGA.BH.A0DX.01	2156	0	62	FEMALE	M0	N0	I	T1	Positive	Positive	Negative	NA	11	0	16.1568	high	lager.50	Luminal A	LumA
TCGA.BH.A0E1	TCGA.BH.A0E1	TCGA.BH.A0E1.01	477	0	52	FEMALE	M0	N1	II	T2	Positive	Positive	Negative	NA	17	2	3.69335	low	lager.50	Luminal A	LumA
TCGA.BH.A0E2	TCGA.BH.A0E2	TCGA.BH.A0E2.01	435	0	49	FEMALE	M0	N2	III	T2	Positive	Positive	Negative	NA	26	4	10.6269	high	less.50	Luminal A	LumA
TCGA.BH.A0E7	TCGA.BH.A0E7	TCGA.BH.A0E7.01	1363	0	79	FEMALE	M0	N1	II	T2	Positive	Positive	Negative	NO	17	1	10.7315	high	lager.50	Luminal A	LumA
TCGA.BH.A0E9	TCGA.BH.A0E9	TCGA.BH.A0E9.01	2489	0	53	FEMALE	M0	N1	II	T2	Positive	Positive	Negative	NA	12	3	0.582641	low	lager.50	Luminal A	LumA
TCGA.BH.A0EA	TCGA.BH.A0EA	TCGA.BH.A0EA.01	991	1	72	FEMALE	M0	N1	II	T1	Positive	Positive	Negative	NA	4	2	3.90884	low	lager.50	Luminal A	LumA
TCGA.BH.A0EB	TCGA.BH.A0EB	TCGA.BH.A0EB.01	745	0	69	FEMALE	M0	N0	I	T1	Positive	Positive	Negative	NO	4	0	3.48424	low	lager.50	Luminal A	LumA
TCGA.BH.A0EI	TCGA.BH.A0EI	TCGA.BH.A0EI.01	1926	0	51	FEMALE	M0	N1	II	T1	Positive	Positive	Negative	NA	2	2	27.4078	high	lager.50	Luminal A	LumA
TCGA.BH.A0GY	TCGA.BH.A0GY	TCGA.BH.A0GY.01	923	0	67	FEMALE	M0	N1	II	T2	Positive	Positive	Negative	NO	26	3	10.7646	high	lager.50	Luminal A	LumA
TCGA.BH.A0GZ	TCGA.BH.A0GZ	TCGA.BH.A0GZ.01	328	0	62	FEMALE	M0	N1	II	T1	Positive	Positive	Negative	NO	14	1	4.60033	low	lager.50	Luminal A	LumA
TCGA.BH.A0H3	TCGA.BH.A0H3	TCGA.BH.A0H3.01	1928	0	46	FEMALE	M0	N0	I	T1	Positive	Positive	Negative	NA	2	0	5.45925	high	less.50	Luminal A	LumA
TCGA.BH.A0H5	TCGA.BH.A0H5	TCGA.BH.A0H5.01	1620	0	45	FEMALE	M0	N0	I	T1	Positive	Positive	Negative	NA	1	0	1.76778	low	less.50	Luminal A	LumA
TCGA.BH.A0H6	TCGA.BH.A0H6	TCGA.BH.A0H6.01	747	0	82	FEMALE	M0	NA	I	T1	Positive	Positive	Negative	NA	0	0	15.4742	high	lager.50	Luminal A	LumA
TCGA.BH.A0H7	TCGA.BH.A0H7	TCGA.BH.A0H7.01	702	0	65	FEMALE	M0	N2	III	T1	Positive	Positive	Negative	NA	16	6	21.816	high	lager.50	Luminal A	LumA
TCGA.BH.A0H9	TCGA.BH.A0H9	TCGA.BH.A0H9.01	1247	0	69	FEMALE	M0	N0	II	T2	Positive	Positive	Negative	NA	1	0	3.00187	low	lager.50	Luminal A	LumA
TCGA.BH.A0HA	TCGA.BH.A0HA	TCGA.BH.A0HA.01	1611	0	31	FEMALE	M0	N0	I	T1	Positive	Positive	Negative	NA	4	0	5.13442	high	less.50	Luminal A	LumA
TCGA.BH.A0HB	TCGA.BH.A0HB	TCGA.BH.A0HB.01	806	0	55	FEMALE	M0	N0	I	T1	Positive	Positive	Negative	NA	2	0	3.29808	low	lager.50	Luminal A	LumA
TCGA.BH.A0HF	TCGA.BH.A0HF	TCGA.BH.A0HF.01	727	0	77	FEMALE	M0	N0	I	T1	Positive	Positive	Negative	NA	2	0	8.62091	high	lager.50	Luminal A	LumA
TCGA.BH.A0HI	TCGA.BH.A0HI	TCGA.BH.A0HI.01	620	0	78	FEMALE	M0	N0	I	T1	Positive	Positive	Negative	NA	1	0	7.9689	high	lager.50	Luminal A	LumA
TCGA.BH.A0HK	TCGA.BH.A0HK	TCGA.BH.A0HK.01	178	0	81	FEMALE	M0	N1	II	T2	Positive	Negative	Negative	NA	17	2	0.902579	low	lager.50	Luminal A	LumA
TCGA.BH.A0HO	TCGA.BH.A0HO	TCGA.BH.A0HO.01	76	0	48	FEMALE	M0	N1	II	T1	Positive	Positive	Negative	NA	18	1	1.99714	low	less.50	Luminal A	LumA
TCGA.BH.A0HP	TCGA.BH.A0HP	TCGA.BH.A0HP.01	414	0	65	FEMALE	M0	N2	III	T3	Positive	Negative	Negative	NA	17	8	2.53032	low	lager.50	Luminal A	LumA
TCGA.BH.A0HQ	TCGA.BH.A0HQ	TCGA.BH.A0HQ.01	1121	0	56	FEMALE	M0	N0	II	T2	Positive	Positive	Negative	NA	4	0	4.24798	low	lager.50	Luminal A	LumA
TCGA.BH.A0HX	TCGA.BH.A0HX	TCGA.BH.A0HX.01	829	0	54	FEMALE	M0	N1	II	T2	Positive	Positive	Negative	NA	24	2	8.61535	high	lager.50	Luminal A	LumA
TCGA.BH.A0W4	TCGA.BH.A0W4	TCGA.BH.A0W4.01	759	0	46	FEMALE	M0	N0	II	T2	Positive	Positive	Negative	NA	3	NA	10.6633	high	less.50	Luminal A	LumA
TCGA.BH.A0W5	TCGA.BH.A0W5	TCGA.BH.A0W5.01	1288	0	77	FEMALE	M0	N1	II	T1	Positive	Positive	Negative	NA	11	1	5.54304	high	lager.50	Luminal A	LumA
TCGA.BH.A0W7	TCGA.BH.A0W7	TCGA.BH.A0W7.01	1363	0	49	FEMALE	M0	N0	I	T1	Positive	Positive	Negative	NA	2	0	7.07348	high	less.50	Luminal A	LumA
TCGA.BH.A18H	TCGA.BH.A18H	TCGA.BH.A18H.01	652	0	63	FEMALE	M0	N0	I	T1	Positive	Positive	Negative	NA	2	0	2.88033	low	lager.50	Luminal A	LumA
TCGA.BH.A18I	TCGA.BH.A18I	TCGA.BH.A18I.01	1093	0	53	FEMALE	NA	N1	II	T1	Positive	Positive	Negative	NA	3	1	22.1022	high	lager.50	Luminal A	LumA
TCGA.BH.A18M	TCGA.BH.A18M	TCGA.BH.A18M.01	2207	1	39	FEMALE	M0	N1	III	T3	Positive	Positive	Positive	NA	6	4	14.5412	high	less.50	Luminal A	LumA
TCGA.BH.A18N	TCGA.BH.A18N	TCGA.BH.A18N.01	1148	1	88	FEMALE	M0	N1	II	T2	Positive	Positive	Negative	NA	26	2	4.03978	low	lager.50	Luminal A	LumA
TCGA.BH.A18S	TCGA.BH.A18S	TCGA.BH.A18S.01	2009	1	79	FEMALE	M0	N0	I	T1	Positive	Positive	NA	NA	2	0	1.65313	low	lager.50	Luminal A	LumA
TCGA.BH.A18T	TCGA.BH.A18T	TCGA.BH.A18T.01	224	1	70	FEMALE	M0	N0	II	T2	Negative	Negative	Negative	NA	NA	NA	2.0809	low	lager.50	Luminal A	Basal
TCGA.BH.A1EO	TCGA.BH.A1EO	TCGA.BH.A1EO.01	2798	1	68	FEMALE	M0	N1	II	T1	Positive	Positive	Negative	NA	15	1	27.3793	high	lager.50	Luminal A	LumA
TCGA.BH.A1ES	TCGA.BH.A1ES	TCGA.BH.A1ES.01	3462	1	35	FEMALE	M0	N1	II	T2	Positive	Positive	Negative	NA	4	1	16.0786	high	less.50	Luminal A	LumA
TCGA.BH.A1ET	TCGA.BH.A1ET	TCGA.BH.A1ET.01	2520	1	55	FEMALE	M0	N0	I	T1	Positive	Positive	Negative	NA	19	1	4.90844	high	lager.50	Luminal A	LumA
TCGA.BH.A1EU	TCGA.BH.A1EU	TCGA.BH.A1EU.01	1286	1	83	FEMALE	M0	N0	I	T1	Positive	Positive	Negative	NA	NA	NA	4.83859	high	lager.50	Luminal A	LumA
TCGA.C8.A12N	TCGA.C8.A12N	TCGA.C8.A12N.01	358	0	58	FEMALE	M0	N0	II	T2	Positive	Positive	Negative	NA	10	NA	17.7455	high	lager.50	Luminal A	LumA
TCGA.C8.A12O	TCGA.C8.A12O	TCGA.C8.A12O.01	385	0	50	FEMALE	M0	N0	II	T2	Positive	Positive	NA	NA	10	NA	8.29252	high	lager.50	Luminal A	LumA
TCGA.C8.A12Y	TCGA.C8.A12Y	TCGA.C8.A12Y.01	1476	0	44	FEMALE	M0	N1	II	T2	NA	NA	Negative	NA	9	NA	2.01998	low	less.50	Luminal A	LumA
TCGA.C8.A132	TCGA.C8.A132	TCGA.C8.A132.01	383	0	56	FEMALE	M0	N1	II	T2	Positive	Positive	Positive	NA	4	1	5.69799	high	lager.50	Luminal A	LumA
TCGA.C8.A1HI	TCGA.C8.A1HI	TCGA.C8.A1HI.01	343	0	40	FEMALE	M0	N2	III	T2	Positive	Positive	Negative	NA	6	NA	1.49833	low	less.50	Luminal A	LumA
TCGA.D8.A141	TCGA.D8.A141	TCGA.D8.A141.01	626	0	40	FEMALE	M0	N1	NA	T1	Positive	Positive	Negative	NA	15	1	13.2061	high	less.50	Luminal A	LumA
TCGA.D8.A145	TCGA.D8.A145	TCGA.D8.A145.01	410	0	80	FEMALE	M0	N1	II	T1	Positive	Positive	Negative	NA	7	1	2.48026	low	lager.50	Luminal A	LumA
TCGA.E2.A105	TCGA.E2.A105	TCGA.E2.A105.01	1308	0	79	FEMALE	M0	N0	II	T2	Positive	Positive	NA	NA	1	0	4.02554	low	lager.50	Luminal A	LumA
TCGA.E2.A106	TCGA.E2.A106	TCGA.E2.A106.01	2541	0	34	FEMALE	M0	N1	I	T1	Positive	Positive	Negative	NA	16	1	1.46917	low	less.50	Luminal A	LumA
TCGA.E2.A10B	TCGA.E2.A10B	TCGA.E2.A10B.01	1141	0	67	FEMALE	M0	N1	II	T2	Positive	Positive	Negative	YES	28	2	5.4003	high	lager.50	Luminal A	LumA
TCGA.E2.A10E	TCGA.E2.A10E	TCGA.E2.A10E.01	865	0	64	FEMALE	M0	N1	II	T1	Positive	Positive	Negative	NA	21	2	13.1223	high	lager.50	Luminal A	LumA
TCGA.E2.A10F	TCGA.E2.A10F	TCGA.E2.A10F.01	878	0	47	FEMALE	M0	N0	II	T2	Positive	Positive	Negative	NA	2	0	15.7965	high	less.50	Luminal A	LumA
TCGA.E2.A14Q	TCGA.E2.A14Q	TCGA.E2.A14Q.01	1163	0	50	FEMALE	M0	N1	II	T2	Positive	Positive	Negative	NA	7	1	3.55461	low	lager.50	Luminal A	LumA
TCGA.E2.A14T	TCGA.E2.A14T	TCGA.E2.A14T.01	2311	0	52	FEMALE	M0	N0	II	T2	Positive	Positive	Negative	NA	7	0	4.58068	low	lager.50	Luminal A	LumA
TCGA.E2.A14Z	TCGA.E2.A14Z	TCGA.E2.A14Z.01	563	1	64	FEMALE	M0	N0	I	T1	Positive	Positive	Negative	NA	1	0	9.30593	high	lager.50	Luminal A	LumA
TCGA.E2.A153	TCGA.E2.A153	TCGA.E2.A153.01	707	0	51	FEMALE	M0	N1	II	T2	Positive	Positive	Negative	NA	15	3	25.5131	high	lager.50	Luminal A	LumA
TCGA.E2.A154	TCGA.E2.A154	TCGA.E2.A154.01	591	0	68	FEMALE	M0	N0	I	T1	Positive	Positive	Negative	NA	2	0	9.53711	high	lager.50	Luminal A	LumA
TCGA.E2.A156	TCGA.E2.A156	TCGA.E2.A156.01	726	0	61	FEMALE	M0	N0	I	T1	Positive	Positive	Negative	NA	3	0	3.84558	low	lager.50	Luminal A	LumA
TCGA.E2.A15C	TCGA.E2.A15C	TCGA.E2.A15C.01	694	0	61	FEMALE	M0	N0	I	T1	Positive	Positive	Negative	NA	4	0	9.95496	high	lager.50	Luminal A	LumA
TCGA.E2.A15D	TCGA.E2.A15D	TCGA.E2.A15D.01	526	0	47	FEMALE	M0	N0	II	T2	Positive	Positive	Negative	NA	4	0	4.26798	low	less.50	Luminal A	LumA
TCGA.E2.A15E	TCGA.E2.A15E	TCGA.E2.A15E.01	630	0	40	FEMALE	M0	N1	II	T1	Positive	Positive	Positive	NA	9	1	6.77906	high	less.50	Luminal A	LumA
TCGA.E2.A15G	TCGA.E2.A15G	TCGA.E2.A15G.01	554	0	76	FEMALE	M0	N0	II	T2	Positive	Positive	Negative	NA	1	0	2.71395	low	lager.50	Luminal A	LumA
TCGA.E2.A15H	TCGA.E2.A15H	TCGA.E2.A15H.01	393	0	38	FEMALE	M0	N1	II	T1	Positive	Positive	Positive	NA	4	1	8.56083	high	less.50	Luminal A	LumA
TCGA.E2.A15I	TCGA.E2.A15I	TCGA.E2.A15I.01	1692	0	44	FEMALE	M0	N0	II	T2	Positive	Positive	Negative	NA	4	0	3.0946	low	less.50	Luminal A	LumA
TCGA.E2.A15J	TCGA.E2.A15J	TCGA.E2.A15J.01	1640	0	51	FEMALE	M0	N0	I	T1	Positive	Positive	Negative	NA	12	0	11.0451	high	lager.50	Luminal A	LumA
TCGA.E2.A15O	TCGA.E2.A15O	TCGA.E2.A15O.01	1545	0	89	FEMALE	M0	NA	I	T1	Positive	Positive	Negative	YES	NA	NA	4.71132	low	lager.50	Luminal A	LumA
TCGA.E2.A15P	TCGA.E2.A15P	TCGA.E2.A15P.01	595	0	61	FEMALE	M0	N0	I	T1	Positive	Positive	Negative	NA	2	0	2.07664	low	lager.50	Luminal A	LumA
TCGA.E2.A15R	TCGA.E2.A15R	TCGA.E2.A15R.01	1732	0	64	FEMALE	M0	N1	II	T1	Positive	Positive	Negative	NA	4	3	6.11246	high	lager.50	Luminal A	LumA
TCGA.E2.A1B1	TCGA.E2.A1B1	TCGA.E2.A1B1.01	2653	0	45	FEMALE	M0	N1	II	T2	Positive	Positive	Positive	NA	6	1	8.30008	high	less.50	Luminal A	LumA
TCGA.E2.A1B4	TCGA.E2.A1B4	TCGA.E2.A1B4.01	1004	1	74	FEMALE	M0	N2	III	T1	Positive	Positive	Negative	NA	4	3	2.30345	low	lager.50	Luminal A	LumA
TCGA.E2.A1BC	TCGA.E2.A1BC	TCGA.E2.A1BC.01	501	0	63	FEMALE	M0	N0	I	T1	Positive	Positive	Negative	NA	4	0	8.73374	high	lager.50	Luminal A	LumA
TCGA.E2.A1BD	TCGA.E2.A1BD	TCGA.E2.A1BD.01	1133	0	53	FEMALE	M0	N0	II	T2	Positive	Positive	Negative	NA	1	0	1.48084	low	lager.50	Luminal A	LumA
TCGA.A1.A0SM	TCGA.A1.A0SM	TCGA.A1.A0SM.01	242	0	77	MALE	M0	N0	II	T2	Positive	Negative	Positive	NA	3	0	25.5132	high	lager.50	Luminal B	LumA
TCGA.A2.A04R	TCGA.A2.A04R	TCGA.A2.A04R.01	3709	0	36	FEMALE	M0	N0	I	T1	Positive	Positive	Negative	NA	1	0	9.52608	high	less.50	Luminal B	LumB
TCGA.A2.A0CT	TCGA.A2.A0CT	TCGA.A2.A0CT.01	2289	0	71	FEMALE	M0	N0	II	T2	Positive	Negative	Negative	NA	2	0	2.33403	low	lager.50	Luminal B	LumA
TCGA.A2.A0CW	TCGA.A2.A0CW	TCGA.A2.A0CW.01	3283	0	67	FEMALE	M0	N1	II	T2	Positive	Positive	Negative	NA	19	2	1.74917	low	lager.50	Luminal B	LumB
TCGA.A2.A0D4	TCGA.A2.A0D4	TCGA.A2.A0D4.01	767	0	37	FEMALE	M0	N1	II	T2	Positive	Positive	Negative	NA	23	1	0.971704	low	less.50	Luminal B	LumB
TCGA.A2.A0ER	TCGA.A2.A0ER	TCGA.A2.A0ER.01	2263	0	63	FEMALE	M0	N1	I	T1	Positive	Positive	Negative	NA	14	1	2.74483	low	lager.50	Luminal B	LumA
TCGA.A2.A0EY	TCGA.A2.A0EY	TCGA.A2.A0EY.01	1925	0	62	FEMALE	M0	N1	II	T2	Positive	Negative	Positive	NA	23	1	3.7841	low	lager.50	Luminal B	LumB
TCGA.A2.A0SV	TCGA.A2.A0SV	TCGA.A2.A0SV.01	825	1	63	FEMALE	M1	N2	IV	T2	Positive	Positive	Negative	YES	9	8	11.4117	high	lager.50	Luminal B	LumB
TCGA.A2.A0SW	TCGA.A2.A0SW	TCGA.A2.A0SW.01	1365	1	82	FEMALE	M1	N2	IV	T2	Positive	Negative	Negative	NO	15	4	6.63814	high	lager.50	Luminal B	LumB
TCGA.A2.A0T3	TCGA.A2.A0T3	TCGA.A2.A0T3.01	1516	0	37	FEMALE	M0	N1	I	T1	Positive	Positive	Negative	NA	13	2	7.76861	high	less.50	Luminal B	LumB
TCGA.A2.A0T4	TCGA.A2.A0T4	TCGA.A2.A0T4.01	624	0	62	FEMALE	M0	N0	II	T2	Positive	Positive	Negative	NA	2	0	7.41033	high	lager.50	Luminal B	LumA
TCGA.A2.A0YG	TCGA.A2.A0YG	TCGA.A2.A0YG.01	666	0	63	FEMALE	M0	N3	III	T2	Positive	Positive	Positive	NA	18	14	10.7732	high	lager.50	Luminal B	LumB
TCGA.A2.A0YH	TCGA.A2.A0YH	TCGA.A2.A0YH.01	659	0	53	FEMALE	M0	N2	III	T2	Positive	Positive	Negative	NA	28	5	5.20001	high	lager.50	Luminal B	LumB
TCGA.A7.A0CJ	TCGA.A7.A0CJ	TCGA.A7.A0CJ.01	931	0	57	FEMALE	M0	N0	II	T2	Positive	Positive	Negative	NA	1	0	3.02707	low	lager.50	Luminal B	LumB
TCGA.A7.A13F	TCGA.A7.A13F	TCGA.A7.A13F.01	765	0	44	FEMALE	M0	N1	III	T3	Positive	Positive	Negative	NA	11	3	5.10759	high	less.50	Luminal B	LumB
TCGA.A8.A06O	TCGA.A8.A06O	TCGA.A8.A06O.01	396	0	60	FEMALE	M0	N0	I	T1	Positive	Positive	Negative	NA	NA	NA	2.85413	low	lager.50	Luminal B	LumB
TCGA.A8.A06Q	TCGA.A8.A06Q	TCGA.A8.A06Q.01	31	0	63	FEMALE	M0	N2	III	T3	Positive	Positive	Negative	NA	NA	NA	0.321773	low	lager.50	Luminal B	LumB
TCGA.A8.A06R	TCGA.A8.A06R	TCGA.A8.A06R.01	547	0	69	FEMALE	M0	N1	II	T2	Positive	Negative	NA	NA	NA	NA	9.59332	high	lager.50	Luminal B	LumB
TCGA.A8.A06X	TCGA.A8.A06X	TCGA.A8.A06X.01	943	1	77	FEMALE	M0	N0	II	T3	Positive	Negative	Positive	NA	NA	NA	5.211	high	lager.50	Luminal B	LumB
TCGA.A8.A06Z	TCGA.A8.A06Z	TCGA.A8.A06Z.01	31	0	84	FEMALE	M0	N0	II	T3	Positive	Positive	Negative	NA	NA	NA	1.08832	low	lager.50	Luminal B	LumB
TCGA.A8.A079	TCGA.A8.A079	TCGA.A8.A079.01	274	0	69	FEMALE	M0	N3	III	T4	Positive	Positive	Negative	NA	NA	NA	2.48514	low	lager.50	Luminal B	LumB
TCGA.A8.A07L	TCGA.A8.A07L	TCGA.A8.A07L.01	975	0	58	FEMALE	M0	N1	III	T3	Positive	Positive	Negative	NA	NA	NA	7.81633	high	lager.50	Luminal B	LumB
TCGA.A8.A07S	TCGA.A8.A07S	TCGA.A8.A07S.01	243	0	73	FEMALE	M0	N0	II	T2	Positive	Negative	Negative	NA	NA	NA	4.9151	high	lager.50	Luminal B	LumB
TCGA.A8.A07W	TCGA.A8.A07W	TCGA.A8.A07W.01	304	0	76	FEMALE	M1	NA	IV	T2	Positive	Positive	Negative	NA	NA	NA	41.1449	high	lager.50	Luminal B	LumB
TCGA.A8.A084	TCGA.A8.A084	TCGA.A8.A084.01	458	0	81	FEMALE	M0	N1	II	T2	Positive	Negative	Negative	NA	NA	NA	16.8311	high	lager.50	Luminal B	LumB
TCGA.A8.A085	TCGA.A8.A085	TCGA.A8.A085.01	1124	0	44	MALE	M0	N1	II	T2	Positive	Positive	Negative	NA	NA	NA	6.45411	high	less.50	Luminal B	LumB
TCGA.A8.A08F	TCGA.A8.A08F	TCGA.A8.A08F.01	1004	0	59	FEMALE	M0	N3	III	T2	Positive	Positive	Negative	NA	NA	NA	15.9473	high	lager.50	Luminal B	LumB
TCGA.A8.A08G	TCGA.A8.A08G	TCGA.A8.A08G.01	607	0	41	FEMALE	M0	N0	II	T2	Positive	Positive	Positive	NA	NA	NA	6.93673	high	less.50	Luminal B	LumB
TCGA.A8.A08I	TCGA.A8.A08I	TCGA.A8.A08I.01	365	0	53	FEMALE	M0	N0	II	T2	Positive	Positive	Negative	NA	NA	NA	0.752642	low	lager.50	Luminal B	LumB
TCGA.A8.A08P	TCGA.A8.A08P	TCGA.A8.A08P.01	943	0	70	FEMALE	M0	N2	III	T2	Positive	Positive	Positive	NA	NA	NA	7.78997	high	lager.50	Luminal B	LumB
TCGA.A8.A095	TCGA.A8.A095	TCGA.A8.A095.01	1277	0	45	FEMALE	M0	N0	I	T1	Positive	Positive	Negative	NA	NA	NA	5.06009	high	less.50	Luminal B	LumB
TCGA.A8.A097	TCGA.A8.A097	TCGA.A8.A097.01	365	0	65	FEMALE	M0	N1	II	T2	Positive	Positive	Positive	NA	NA	NA	14.6918	high	lager.50	Luminal B	LumA
TCGA.A8.A09C	TCGA.A8.A09C	TCGA.A8.A09C.01	31	0	69	FEMALE	NA	N0	NA	T2	Positive	Positive	Negative	NA	NA	NA	8.10795	high	lager.50	Luminal B	LumB
TCGA.A8.A09D	TCGA.A8.A09D	TCGA.A8.A09D.01	1522	0	47	FEMALE	M0	N1	II	T2	Positive	Positive	Negative	NA	NA	NA	10.4154	high	less.50	Luminal B	LumA
TCGA.A8.A09I	TCGA.A8.A09I	TCGA.A8.A09I.01	1371	0	84	FEMALE	M0	N0	II	T2	Positive	Positive	Positive	NA	NA	NA	9.94266	high	lager.50	Luminal B	LumB
TCGA.A8.A09M	TCGA.A8.A09M	TCGA.A8.A09M.01	1006	0	75	FEMALE	M0	N3	III	T2	Positive	Positive	Negative	NA	NA	NA	2.70728	low	lager.50	Luminal B	LumB
TCGA.A8.A09N	TCGA.A8.A09N	TCGA.A8.A09N.01	31	0	57	FEMALE	M0	N3	III	T2	Positive	Positive	Positive	NA	NA	NA	4.517	low	lager.50	Luminal B	LumB
TCGA.A8.A09Q	TCGA.A8.A09Q	TCGA.A8.A09Q.01	761	0	83	FEMALE	M0	N2	III	T4	Positive	Positive	Negative	NA	NA	NA	8.36852	high	lager.50	Luminal B	LumB
TCGA.A8.A09R	TCGA.A8.A09R	TCGA.A8.A09R.01	273	0	82	FEMALE	M0	N1	II	T2	Positive	Positive	Negative	NA	NA	NA	23.9463	high	lager.50	Luminal B	LumB
TCGA.A8.A09W	TCGA.A8.A09W	TCGA.A8.A09W.01	30	0	70	FEMALE	M0	N3	III	T2	Positive	Positive	Negative	NA	NA	NA	4.91398	high	lager.50	Luminal B	LumB
TCGA.A8.A0A9	TCGA.A8.A0A9	TCGA.A8.A0A9.01	822	0	80	FEMALE	M0	N0	II	T2	Positive	Positive	Negative	NA	NA	NA	11.1027	high	lager.50	Luminal B	LumA
TCGA.A8.A0AB	TCGA.A8.A0AB	TCGA.A8.A0AB.01	518	0	54	FEMALE	M0	N0	II	T2	Positive	Positive	Negative	NA	NA	NA	5.18485	high	lager.50	Luminal B	LumA
TCGA.AN.A03Y	TCGA.AN.A03Y	TCGA.AN.A03Y.01	10	0	66	FEMALE	M0	N0	II	T2	Positive	Positive	Negative	NA	9	0	2.92379	low	lager.50	Luminal B	LumB
TCGA.AN.A041	TCGA.AN.A041	TCGA.AN.A041.01	7	0	29	FEMALE	M0	N1	II	T2	Positive	Negative	NA	NA	18	1	13.4629	high	less.50	Luminal B	LumA
TCGA.AN.A049	TCGA.AN.A049	TCGA.AN.A049.01	19	0	62	FEMALE	M0	N0	II	T2	Positive	Positive	Negative	NA	9	0	10.342	high	lager.50	Luminal B	LumA
TCGA.AN.A0AJ	TCGA.AN.A0AJ	TCGA.AN.A0AJ.01	303	0	79	FEMALE	M0	N0	II	T3	Positive	Positive	Positive	NA	9	0	5.01242	high	lager.50	Luminal B	LumB
TCGA.AN.A0AK	TCGA.AN.A0AK	TCGA.AN.A0AK.01	224	0	76	FEMALE	M0	N0	II	T2	Positive	Negative	Negative	NA	11	0	2.26425	low	lager.50	Luminal B	LumB
TCGA.AN.A0AM	TCGA.AN.A0AM	TCGA.AN.A0AM.01	5	0	56	FEMALE	M0	N0	II	T2	Positive	Negative	Negative	NA	20	0	1.9689	low	lager.50	Luminal B	LumB
TCGA.AN.A0AS	TCGA.AN.A0AS	TCGA.AN.A0AS.01	10	0	70	FEMALE	M0	N2	III	T2	Positive	Negative	Negative	NA	9	4	13.1584	high	lager.50	Luminal B	LumA
TCGA.AN.A0FF	TCGA.AN.A0FF	TCGA.AN.A0FF.01	172	0	32	FEMALE	M0	N0	I	T1	Positive	Positive	Negative	NA	14	0	2.5094	low	less.50	Luminal B	LumB
TCGA.AN.A0FK	TCGA.AN.A0FK	TCGA.AN.A0FK.01	213	0	88	FEMALE	M0	N0	III	T4	Positive	Positive	Negative	NA	7	0	4.11957	low	lager.50	Luminal B	LumA
TCGA.AN.A0FY	TCGA.AN.A0FY	TCGA.AN.A0FY.01	10	0	55	FEMALE	M0	N0	I	T1	Positive	Positive	Negative	NA	11	0	6.65452	high	lager.50	Luminal B	LumB
TCGA.AN.A0XR	TCGA.AN.A0XR	TCGA.AN.A0XR.01	10	0	55	FEMALE	M0	N2	III	T2	Positive	Negative	Negative	NA	14	7	6.75185	high	lager.50	Luminal B	LumB
TCGA.AN.A0XW	TCGA.AN.A0XW	TCGA.AN.A0XW.01	170	0	36	FEMALE	M0	N2	III	T2	Positive	Positive	Negative	NA	14	1	8.55458	high	less.50	Luminal B	LumA
TCGA.AO.A03O	TCGA.AO.A03O	TCGA.AO.A03O.01	2483	1	69	FEMALE	M0	N0	II	T2	Positive	Positive	Negative	NA	17	0	1.98865	low	lager.50	Luminal B	LumB
TCGA.AO.A03P	TCGA.AO.A03P	TCGA.AO.A03P.01	2911	1	54	FEMALE	M0	N1	II	T2	Positive	Positive	Negative	YES	26	0	4.24038	low	lager.50	Luminal B	LumB
TCGA.AO.A0J3	TCGA.AO.A0J3	TCGA.AO.A0J3.01	651	0	67	FEMALE	M0	N1	II	T2	Positive	Positive	Negative	NA	36	1	0.557968	low	lager.50	Luminal B	LumB
TCGA.AO.A0J7	TCGA.AO.A0J7	TCGA.AO.A0J7.01	618	0	71	FEMALE	M0	N1	II	T2	Positive	Positive	Negative	NA	11	3	3.87798	low	lager.50	Luminal B	LumB
TCGA.AO.A0JC	TCGA.AO.A0JC	TCGA.AO.A0JC.01	1547	0	64	FEMALE	M0	N0	II	T2	Positive	Positive	Negative	NA	12	0	0.237729	low	lager.50	Luminal B	LumA
TCGA.AO.A0JD	TCGA.AO.A0JD	TCGA.AO.A0JD.01	2190	0	59	FEMALE	M0	N1	III	T3	Positive	Positive	Negative	NA	27	3	4.02282	low	lager.50	Luminal B	LumB
TCGA.AO.A0JI	TCGA.AO.A0JI	TCGA.AO.A0JI.01	1528	0	56	FEMALE	M0	N1	II	T1	Positive	Negative	Negative	NA	10	0	1.00157	low	lager.50	Luminal B	LumA
TCGA.AO.A0JM	TCGA.AO.A0JM	TCGA.AO.A0JM.01	2184	0	40	FEMALE	M0	N1	II	T2	Positive	Positive	Positive	NA	23	2	14.5496	high	less.50	Luminal B	LumB
TCGA.AO.A12B	TCGA.AO.A12B	TCGA.AO.A12B.01	2989	0	63	FEMALE	M0	N0	II	T2	Positive	Positive	Negative	NA	2	0	1.25644	low	lager.50	Luminal B	LumA
TCGA.AQ.A04H	TCGA.AQ.A04H	TCGA.AQ.A04H.01	754	0	61	FEMALE	NA	N2	III	T2	Positive	Positive	Positive	NA	15	4	5.12204	high	lager.50	Luminal B	LumB
TCGA.AR.A0TQ	TCGA.AR.A0TQ	TCGA.AR.A0TQ.01	2991	0	27	FEMALE	M0	N1	III	T3	Positive	Negative	Positive	NA	15	2	7.19285	high	less.50	Luminal B	LumB
TCGA.AR.A0TT	TCGA.AR.A0TT	TCGA.AR.A0TT.01	3316	0	53	FEMALE	M0	N2	III	T2	Positive	Negative	Negative	NA	19	5	4.16781	low	lager.50	Luminal B	LumB
TCGA.AR.A0TV	TCGA.AR.A0TV	TCGA.AR.A0TV.01	2288	0	66	FEMALE	M0	N0	II	T2	Positive	Positive	Negative	NA	3	0	1.64245	low	lager.50	Luminal B	LumB
TCGA.AR.A0TY	TCGA.AR.A0TY	TCGA.AR.A0TY.01	1699	1	54	FEMALE	M0	N0	II	T2	Positive	Negative	Negative	NA	15	0	2.54802	low	lager.50	Luminal B	LumB
TCGA.AR.A0TZ	TCGA.AR.A0TZ	TCGA.AR.A0TZ.01	3262	1	43	FEMALE	M1	N2	III	T2	Positive	Positive	Negative	NA	30	6	4.46793	low	less.50	Luminal B	LumA
TCGA.AR.A0U2	TCGA.AR.A0U2	TCGA.AR.A0U2.01	2551	1	47	FEMALE	M0	N2	III	T2	Positive	Positive	Negative	NA	16	4	5.16691	high	less.50	Luminal B	LumB
TCGA.AR.A0U3	TCGA.AR.A0U3	TCGA.AR.A0U3.01	4080	0	59	FEMALE	M0	N1	II	T2	Positive	Positive	Negative	NA	4	1	2.86316	low	lager.50	Luminal B	LumA
TCGA.AR.A1AV	TCGA.AR.A1AV	TCGA.AR.A1AV.01	1864	0	68	MALE	M0	N1	II	T2	Positive	Positive	Negative	NA	25	1	13.7909	high	lager.50	Luminal B	LumA
TCGA.B6.A0IB	TCGA.B6.A0IB	TCGA.B6.A0IB.01	3941	1	64	FEMALE	M1	N3	IV	T3	Positive	Positive	Negative	NA	15	8	0.70896	low	lager.50	Luminal B	LumB
TCGA.B6.A0IC	TCGA.B6.A0IC	TCGA.B6.A0IC.01	1542	1	90	FEMALE	NA	NA	NA	T2	Positive	Positive	Negative	NA	NA	NA	0.275997	low	lager.50	Luminal B	LumA
TCGA.B6.A0IM	TCGA.B6.A0IM	TCGA.B6.A0IM.01	3873	1	75	FEMALE	M0	N0	II	T3	Positive	Positive	Negative	NA	9	0	14.343	high	lager.50	Luminal B	LumA
TCGA.B6.A0RL	TCGA.B6.A0RL	TCGA.B6.A0RL.01	2469	1	60	FEMALE	M0	N0	II	T2	Positive	Positive	Negative	NA	16	0	0.052327	low	lager.50	Luminal B	LumB
TCGA.B6.A0WV	TCGA.B6.A0WV	TCGA.B6.A0WV.01	2417	1	67	FEMALE	M0	N1	II	T2	Positive	Positive	Negative	NA	7	4	6.0149	high	lager.50	Luminal B	LumB
TCGA.B6.A0WW	TCGA.B6.A0WW	TCGA.B6.A0WW.01	558	1	58	FEMALE	NA	N1	NA	T2	Positive	Positive	Negative	YES	18	5	6.24738	high	lager.50	Luminal B	LumB
TCGA.B6.A0X5	TCGA.B6.A0X5	TCGA.B6.A0X5.01	2097	1	61	FEMALE	M0	N1	II	T2	Positive	Positive	Negative	NO	14	3	3.48888	low	lager.50	Luminal B	LumB
TCGA.BH.A0AU	TCGA.BH.A0AU	TCGA.BH.A0AU.01	1914	0	45	FEMALE	M0	N0	II	T2	Positive	Positive	Negative	NA	2	0	9.31092	high	less.50	Luminal B	LumB
TCGA.BH.A0AY	TCGA.BH.A0AY	TCGA.BH.A0AY.01	777	0	62	FEMALE	M0	N0	II	T2	Positive	Positive	Negative	NA	1	0	16.4095	high	lager.50	Luminal B	LumA
TCGA.BH.A0B5	TCGA.BH.A0B5	TCGA.BH.A0B5.01	2136	0	40	FEMALE	M0	N2	III	T2	Positive	Positive	Negative	NA	24	5	6.85132	high	less.50	Luminal B	LumA
TCGA.BH.A0BD	TCGA.BH.A0BD	TCGA.BH.A0BD.01	554	0	47	FEMALE	M0	N1	II	T1	Positive	Positive	Negative	NA	9	2	3.51769	low	less.50	Luminal B	LumB
TCGA.BH.A0BF	TCGA.BH.A0BF	TCGA.BH.A0BF.01	1324	1	56	FEMALE	M0	N1	II	T2	Positive	Positive	Negative	NA	3	1	7.28203	high	lager.50	Luminal B	LumB
TCGA.BH.A0BZ	TCGA.BH.A0BZ	TCGA.BH.A0BZ.01	2255	0	59	FEMALE	M0	N1	III	T3	Positive	Positive	Negative	NA	23	1	13.9987	high	lager.50	Luminal B	LumB
TCGA.BH.A0C0	TCGA.BH.A0C0	TCGA.BH.A0C0.01	1270	0	62	FEMALE	M0	N1	II	T1	Positive	Positive	Positive	NA	35	1	1.19775	low	lager.50	Luminal B	LumB
TCGA.BH.A0C3	TCGA.BH.A0C3	TCGA.BH.A0C3.01	2709	0	47	FEMALE	M0	N0	I	T1	Positive	Negative	Negative	NA	4	0	6.78143	high	less.50	Luminal B	LumB
TCGA.BH.A0C7	TCGA.BH.A0C7	TCGA.BH.A0C7.01	2767	0	48	FEMALE	M0	N1	II	T2	Positive	Negative	Positive	NA	18	1	14.887	high	less.50	Luminal B	LumB
TCGA.BH.A0DD	TCGA.BH.A0DD	TCGA.BH.A0DD.01	2486	0	58	MALE	M0	N1	II	T2	Positive	Positive	Positive	NA	22	0	8.4036	high	lager.50	Luminal B	LumB
TCGA.BH.A0H0	TCGA.BH.A0H0	TCGA.BH.A0H0.01	461	0	69	FEMALE	M0	N0	I	T1	Positive	Positive	Negative	NA	2	0	0.161564	low	lager.50	Luminal B	LumB
TCGA.BH.A0HU	TCGA.BH.A0HU	TCGA.BH.A0HU.01	392	0	52	FEMALE	M0	N0	I	T1	Positive	Positive	Negative	NA	1	0	1.69802	low	lager.50	Luminal B	LumB
TCGA.BH.A0HW	TCGA.BH.A0HW	TCGA.BH.A0HW.01	1561	0	62	FEMALE	M0	N0	I	T1	Positive	Negative	Negative	NA	2	0	0.370813	low	lager.50	Luminal B	LumB
TCGA.BH.A0W3	TCGA.BH.A0W3	TCGA.BH.A0W3.01	728	0	58	FEMALE	M0	N1	II	T1	Positive	Positive	Negative	NA	4	1	1.98681	low	lager.50	Luminal B	LumB
TCGA.BH.A18F	TCGA.BH.A18F	TCGA.BH.A18F.01	1001	0	50	FEMALE	M0	N0	II	T2	Positive	Positive	Negative	NA	1	0	10.6146	high	lager.50	Luminal B	LumA
TCGA.BH.A18J	TCGA.BH.A18J	TCGA.BH.A18J.01	612	1	56	FEMALE	M1	N2	IV	T4	Positive	Positive	Negative	NA	NA	NA	9.24404	high	lager.50	Luminal B	LumA
TCGA.BH.A18L	TCGA.BH.A18L	TCGA.BH.A18L.01	811	1	50	FEMALE	M0	N1	III	T3	Positive	Positive	NA	NA	3	1	0.27994	low	lager.50	Luminal B	LumB
TCGA.BH.A18U	TCGA.BH.A18U	TCGA.BH.A18U.01	1563	1	72	FEMALE	M0	N2	III	T2	Positive	Positive	Positive	NA	16	9	7.35103	high	lager.50	Luminal B	LumB
TCGA.BH.A1EW	TCGA.BH.A1EW	TCGA.BH.A1EW.01	1694	1	38	FEMALE	M0	N1	II	T2	Negative	Negative	Negative	NA	16	1	1.83389	low	less.50	Luminal B	LumA
TCGA.C8.A12M	TCGA.C8.A12M	TCGA.C8.A12M.01	358	0	70	FEMALE	M0	N0	II	T2	Positive	Negative	NA	NA	10	NA	1.63945	low	lager.50	Luminal B	LumB
TCGA.C8.A12U	TCGA.C8.A12U	TCGA.C8.A12U.01	385	0	46	FEMALE	M0	N1	II	T2	Positive	Positive	Negative	NA	7	NA	0.904517	low	less.50	Luminal B	LumB
TCGA.C8.A12W	TCGA.C8.A12W	TCGA.C8.A12W.01	385	0	49	FEMALE	M0	N1	III	T4	Positive	Positive	Negative	NA	7	NA	12.6661	high	less.50	Luminal B	LumB
TCGA.C8.A12X	TCGA.C8.A12X	TCGA.C8.A12X.01	385	0	62	FEMALE	M0	N1	II	T2	Positive	Positive	Negative	NA	6	NA	0.262305	low	lager.50	Luminal B	LumA
TCGA.C8.A1HG	TCGA.C8.A1HG	TCGA.C8.A1HG.01	345	0	50	FEMALE	M0	N0	II	T2	Positive	Positive	Negative	NA	NA	NA	2.35732	low	lager.50	Luminal B	LumB
TCGA.C8.A1HL	TCGA.C8.A1HL	TCGA.C8.A1HL.01	317	0	38	FEMALE	M0	N1	III	T3	Positive	Negative	Positive	NA	9	NA	7.95662	high	less.50	Luminal B	LumB
TCGA.C8.A1HM	TCGA.C8.A1HM	TCGA.C8.A1HM.01	375	0	74	FEMALE	M0	N0	II	T2	Positive	Positive	Negative	NA	NA	NA	1.03323	low	lager.50	Luminal B	LumB
TCGA.C8.A1HN	TCGA.C8.A1HN	TCGA.C8.A1HN.01	394	0	56	FEMALE	M0	N0	II	T2	Positive	Positive	NA	NA	NA	NA	4.89824	high	lager.50	Luminal B	LumB
TCGA.D8.A13Y	TCGA.D8.A13Y	TCGA.D8.A13Y.01	1728	0	52	FEMALE	M0	N0	I	T1	Positive	Positive	Negative	NA	6	0	3.45512	low	lager.50	Luminal B	LumB
TCGA.D8.A140	TCGA.D8.A140	TCGA.D8.A140.01	403	0	62	FEMALE	M0	N1	II	T2	Positive	Positive	Positive	NA	15	1	3.32346	low	lager.50	Luminal B	LumA
TCGA.E2.A109	TCGA.E2.A109	TCGA.E2.A109.01	1417	0	64	FEMALE	M0	N0	II	T2	Positive	Negative	Negative	NA	6	0	12.3731	high	lager.50	Luminal B	LumB
TCGA.E2.A10A	TCGA.E2.A10A	TCGA.E2.A10A.01	1229	0	41	FEMALE	M0	N0	II	T3	Positive	Positive	Negative	YES	3	0	13.7507	high	less.50	Luminal B	LumA
TCGA.E2.A10C	TCGA.E2.A10C	TCGA.E2.A10C.01	1220	0	54	FEMALE	M0	N1	II	T2	Positive	Positive	Negative	NA	13	1	2.59815	low	lager.50	Luminal B	LumB
TCGA.E2.A14O	TCGA.E2.A14O	TCGA.E2.A14O.01	1359	0	76	FEMALE	M0	N1	III	T3	Positive	Positive	Negative	NA	18	2	4.81779	high	lager.50	Luminal B	LumB
TCGA.E2.A14S	TCGA.E2.A14S	TCGA.E2.A14S.01	1009	0	65	FEMALE	M0	N0	I	T1	Positive	Positive	Negative	NA	2	0	0.663694	low	lager.50	Luminal B	LumB
TCGA.E2.A14W	TCGA.E2.A14W	TCGA.E2.A14W.01	974	0	78	MALE	M0	N0	II	T2	Positive	Positive	Positive	NA	5	0	5.02061	high	lager.50	Luminal B	LumB
TCGA.E2.A155	TCGA.E2.A155	TCGA.E2.A155.01	640	0	58	FEMALE	M0	N1	II	T2	Positive	Negative	Negative	NA	15	2	1.47061	low	lager.50	Luminal B	LumB
TCGA.E2.A15A	TCGA.E2.A15A	TCGA.E2.A15A.01	710	0	45	FEMALE	M0	N3	III	T2	Positive	Positive	Negative	NA	19	13	12.787	high	less.50	Luminal B	LumB
TCGA.E2.A15K	TCGA.E2.A15K	TCGA.E2.A15K.01	275	0	58	FEMALE	M0	N1	II	T2	Positive	Positive	Negative	NA	17	2	5.68314	high	lager.50	Luminal B	LumB
TCGA.E2.A15L	TCGA.E2.A15L	TCGA.E2.A15L.01	626	0	65	FEMALE	M0	N0	II	T2	Positive	Positive	Negative	NA	3	0	18.2404	high	lager.50	Luminal B	LumA
TCGA.E2.A15M	TCGA.E2.A15M	TCGA.E2.A15M.01	336	1	66	FEMALE	M0	N0	II	T2	Positive	Positive	Negative	NA	5	0	8.05747	high	lager.50	Luminal B	LumA
TCGA.E2.A15S	TCGA.E2.A15S	TCGA.E2.A15S.01	428	0	34	FEMALE	M0	N1	II	T2	Positive	Negative	Negative	NA	17	1	0.31891	low	less.50	Luminal B	LumB
TCGA.A2.A0YK	TCGA.A2.A0YK	TCGA.A2.A0YK.01	588	0	61	FEMALE	M0	N0	II	T2	Positive	Negative	Negative	NA	3	0	2.37164	low	lager.50	Normal-like	Normal
TCGA.AO.A03R	TCGA.AO.A03R	TCGA.AO.A03R.01	2091	0	57	FEMALE	M0	N1	II	T2	Positive	Positive	Negative	NA	26	3	0.983457	low	lager.50	Normal-like	Normal
TCGA.AO.A03T	TCGA.AO.A03T	TCGA.AO.A03T.01	2124	0	42	FEMALE	M0	N1	II	T2	Positive	Positive	Negative	NA	12	2	0.475035	low	less.50	Normal-like	Normal
TCGA.AO.A03U	TCGA.AO.A03U	TCGA.AO.A03U.01	1793	1	31	FEMALE	M0	N0	I	T1	Negative	Negative	Negative	NA	8	0	3.84226	low	less.50	Normal-like	Normal
TCGA.AR.A1AO	TCGA.AR.A1AO	TCGA.AR.A1AO.01	2618	0	47	FEMALE	M0	N1	II	T1	Positive	Negative	Negative	NA	39	2	3.04052	low	less.50	Normal-like	Normal
TCGA.B6.A0IE	TCGA.B6.A0IE	TCGA.B6.A0IE.01	1993	1	38	FEMALE	M0	N1	III	T3	Negative	Negative	Negative	YES	24	6	0.501215	low	less.50	Normal-like	LumA
TCGA.E2.A108	TCGA.E2.A108	TCGA.E2.A108.01	837	0	64	FEMALE	M0	N2	III	T2	Positive	Positive	Negative	NA	27	4	5.13846	high	lager.50	Normal-like	Normal
TCGA.A1.A0SB	TCGA.A1.A0SB	TCGA.A1.A0SB.01	259	0	70	FEMALE	M0	N0	I	T1	Positive	Negative	Negative	NA	2	0	0.0840144	low	lager.50	NA	Normal
TCGA.A1.A0SF	TCGA.A1.A0SF	TCGA.A1.A0SF.01	1463	0	54	FEMALE	M0	N0	II	T2	Positive	Positive	Negative	NA	2	0	1.37198	low	lager.50	NA	LumA
TCGA.A1.A0SG	TCGA.A1.A0SG	TCGA.A1.A0SG.01	434	0	61	FEMALE	M0	N1	II	T2	Positive	Positive	Negative	NA	11	1	5.57457	high	lager.50	NA	LumA
TCGA.A1.A0SI	TCGA.A1.A0SI	TCGA.A1.A0SI.01	635	0	52	FEMALE	M0	N1	II	T2	Positive	Positive	Negative	NA	23	1	17.1	high	lager.50	NA	LumB
TCGA.A1.A0SN	TCGA.A1.A0SN	TCGA.A1.A0SN.01	1196	0	50	FEMALE	NA	N1	II	T1	Positive	Positive	Positive	NA	13	4	11.8769	high	lager.50	NA	LumB
TCGA.A1.A0SP	TCGA.A1.A0SP	TCGA.A1.A0SP.01	584	0	40	FEMALE	M0	N0	II	T2	Negative	Negative	Negative	NA	3	0	2.0095	low	less.50	NA	Basal
TCGA.A1.A0SQ	TCGA.A1.A0SQ	TCGA.A1.A0SQ.01	554	0	45	FEMALE	NA	N1	II	T2	Positive	Positive	Negative	NA	15	1	0.760538	low	less.50	NA	LumA
TCGA.A2.A0YT	TCGA.A2.A0YT	TCGA.A2.A0YT.01	723	1	56	FEMALE	M0	N2	III	T4	Positive	Negative	Negative	NA	5	5	2.61339	low	lager.50	NA	LumB
TCGA.A2.A1FV	TCGA.A2.A1FV	TCGA.A2.A1FV.01	714	0	74	FEMALE	M0	N0	II	T3	Positive	Positive	Negative	NA	2	0	2.90426	low	lager.50	NA	LumA
TCGA.A2.A1FW	TCGA.A2.A1FW	TCGA.A2.A1FW.01	528	0	62	FEMALE	M0	N2	III	T3	Positive	Negative	Negative	NA	19	5	3.09855	low	lager.50	NA	LumB
TCGA.A2.A1FX	TCGA.A2.A1FX	TCGA.A2.A1FX.01	1847	0	61	FEMALE	M0	N2	III	T3	Positive	Positive	Negative	NA	24	6	3.70242	low	lager.50	NA	LumB
TCGA.A2.A1FZ	TCGA.A2.A1FZ	TCGA.A2.A1FZ.01	683	0	63	FEMALE	M0	N0	II	T2	Positive	Positive	Negative	NA	3	0	10.5705	high	lager.50	NA	LumA
TCGA.A2.A1G0	TCGA.A2.A1G0	TCGA.A2.A1G0.01	616	0	49	FEMALE	M0	N1	II	T2	Positive	Positive	Negative	NA	19	2	4.19419	low	less.50	NA	LumA
TCGA.A2.A1G1	TCGA.A2.A1G1	TCGA.A2.A1G1.01	584	0	85	FEMALE	M0	N1	II	T2	Negative	Negative	Positive	NA	13	1	9.29748	high	lager.50	NA	Basal
TCGA.A2.A1G4	TCGA.A2.A1G4	TCGA.A2.A1G4.01	595	0	71	FEMALE	M0	N1	III	T3	Positive	Positive	Negative	NA	15	2	1.32364	low	lager.50	NA	LumB
TCGA.A2.A1G6	TCGA.A2.A1G6	TCGA.A2.A1G6.01	501	0	50	FEMALE	M0	N2	III	T2	Negative	Negative	Negative	NA	9	4	0.0390378	low	lager.50	NA	Normal
TCGA.A2.A259	TCGA.A2.A259	TCGA.A2.A259.01	1596	0	70	FEMALE	M0	N0	I	T1	Positive	Positive	Negative	NA	2	0	4.33553	low	lager.50	NA	LumA
TCGA.A2.A25A	TCGA.A2.A25A	TCGA.A2.A25A.01	3276	0	44	FEMALE	M0	N0	II	T2	Positive	Positive	Negative	NA	14	0	2.36785	low	less.50	NA	Normal
TCGA.A2.A25B	TCGA.A2.A25B	TCGA.A2.A25B.01	1291	0	39	FEMALE	M0	N1	II	T2	Positive	Positive	Negative	NA	8	2	21.8614	high	less.50	NA	LumB
TCGA.A2.A25C	TCGA.A2.A25C	TCGA.A2.A25C.01	523	0	50	FEMALE	M0	N1	II	T2	Positive	Positive	Negative	NA	14	3	7.61353	high	lager.50	NA	LumB
TCGA.A2.A25D	TCGA.A2.A25D	TCGA.A2.A25D.01	552	0	90	FEMALE	M0	N3	III	T2	Positive	Negative	Negative	NA	24	22	1.52611	low	lager.50	NA	LumA
TCGA.A2.A25E	TCGA.A2.A25E	TCGA.A2.A25E.01	3204	0	34	FEMALE	M0	N2	III	T2	Positive	Positive	NA	YES	10	6	11.839	high	less.50	NA	LumB
TCGA.A2.A25F	TCGA.A2.A25F	TCGA.A2.A25F.01	322	0	66	FEMALE	M0	N0	II	T2	Negative	Positive	Negative	NA	2	0	2.77487	low	lager.50	NA	Basal
TCGA.A2.A3KC	TCGA.A2.A3KC	TCGA.A2.A3KC.01	1102	0	55	FEMALE	M0	N1	II	T2	NA	NA	NA	NA	19	2	3.30224	low	lager.50	NA	LumA
TCGA.A2.A3KD	TCGA.A2.A3KD	TCGA.A2.A3KD.01	1206	0	47	FEMALE	M0	N1	III	T3	NA	NA	NA	NA	19	1	1.43073	low	less.50	NA	LumA
TCGA.A7.A13G	TCGA.A7.A13G	TCGA.A7.A13G.01	718	0	79	FEMALE	NA	N0	II	T2	Positive	Positive	Negative	NO	1	0	4.71416	low	lager.50	NA	LumA
TCGA.A7.A26E	TCGA.A7.A26E	TCGA.A7.A26E.01	954	0	71	FEMALE	NA	N1	III	T3	Positive	Positive	Negative	NA	16	0	3.90869	low	lager.50	NA	LumA
TCGA.A7.A26F	TCGA.A7.A26F	TCGA.A7.A26F.01	738	0	55	FEMALE	M0	N0	I	T1	Negative	Negative	Negative	NA	1	0	6.11741	high	lager.50	NA	Basal
TCGA.A7.A26G	TCGA.A7.A26G	TCGA.A7.A26G.01	722	0	50	FEMALE	M0	N0	II	T2	Negative	Negative	Negative	NA	2	0	16.2764	high	lager.50	NA	Basal
TCGA.A7.A26H	TCGA.A7.A26H	TCGA.A7.A26H.01	724	0	72	FEMALE	M0	N1	II	T1	Positive	Negative	Positive	YES	5	0	14.1247	high	lager.50	NA	LumA
TCGA.A7.A26I	TCGA.A7.A26I	TCGA.A7.A26I.01	661	0	65	FEMALE	M0	N0	II	T2	Negative	Negative	Negative	NA	2	0	6.94026	high	lager.50	NA	Basal
TCGA.A7.A26J	TCGA.A7.A26J	TCGA.A7.A26J.01	627	0	49	FEMALE	M0	N0	II	T2	Positive	Positive	Negative	NA	4	0	7.15502	high	less.50	NA	LumA
TCGA.A7.A2KD	TCGA.A7.A2KD	TCGA.A7.A2KD.01	679	0	53	FEMALE	NA	N2	III	T2	NA	NA	NA	NA	10	8	7.79455	high	lager.50	NA	LumB
TCGA.A7.A3IY	TCGA.A7.A3IY	TCGA.A7.A3IY.01	345	0	71	FEMALE	M0	N0	I	T1	NA	NA	NA	NA	1	0	3.72114	low	lager.50	NA	LumA
TCGA.A7.A3IZ	TCGA.A7.A3IZ	TCGA.A7.A3IZ.01	322	0	62	FEMALE	M0	N0	II	T2	NA	NA	NA	NA	1	NA	1.81186	low	lager.50	NA	LumA
TCGA.A7.A3J0	TCGA.A7.A3J0	TCGA.A7.A3J0.01	313	0	62	FEMALE	M0	N0	II	T2	NA	NA	NA	NA	2	0	0.416124	low	lager.50	NA	LumA
TCGA.A7.A3J1	TCGA.A7.A3J1	TCGA.A7.A3J1.01	343	0	63	FEMALE	NA	N0	I	T1	NA	NA	NA	NA	1	0	1.70221	low	lager.50	NA	LumA
TCGA.A8.A08S	TCGA.A8.A08S	TCGA.A8.A08S.01	1004	0	71	FEMALE	M0	N1	II	T1	Positive	Positive	Positive	NA	NA	NA	6.37832	high	lager.50	NA	LumB
TCGA.A8.A09K	TCGA.A8.A09K	TCGA.A8.A09K.01	912	0	68	FEMALE	M0	N1	II	T1	Positive	Positive	Negative	NA	NA	NA	0.336602	low	lager.50	NA	LumA
TCGA.AC.A23C	TCGA.AC.A23C	TCGA.AC.A23C.01	585	0	62	FEMALE	NA	N1	II	T2	Positive	Positive	Positive	NA	1	1	11.4424	high	lager.50	NA	LumA
TCGA.AC.A23E	TCGA.AC.A23E	TCGA.AC.A23E.01	698	0	50	FEMALE	NA	N1	II	T2	Positive	Positive	Negative	NA	2	1	28.0345	high	lager.50	NA	LumA
TCGA.AC.A23G	TCGA.AC.A23G	TCGA.AC.A23G.01	2248	0	76	FEMALE	NA	N1	II	T1	NA	NA	NA	NA	8	2	16.0045	high	lager.50	NA	LumA
TCGA.AC.A23H	TCGA.AC.A23H	TCGA.AC.A23H.01	174	1	90	FEMALE	M0	NA	II	T2	Positive	Negative	Positive	NA	NA	NA	26.1408	high	lager.50	NA	Her2
TCGA.AC.A2B8	TCGA.AC.A2B8	TCGA.AC.A2B8.01	677	0	84	FEMALE	M0	N0	II	T3	NA	NA	NA	NO	1	0	13.1181	high	lager.50	NA	LumA
TCGA.AC.A2BK	TCGA.AC.A2BK	TCGA.AC.A2BK.01	2222	0	78	FEMALE	NA	N2	III	T2	NA	NA	NA	NA	23	6	0.141985	low	lager.50	NA	Basal
TCGA.AC.A2BM	TCGA.AC.A2BM	TCGA.AC.A2BM.01	3022	0	41	FEMALE	NA	N1	II	T2	NA	NA	NA	NA	13	1	2.08979	low	less.50	NA	LumB
TCGA.AC.A2FB	TCGA.AC.A2FB	TCGA.AC.A2FB.01	1234	0	65	FEMALE	NA	N0	II	T2	NA	NA	NA	NA	1	0	0.718163	low	lager.50	NA	LumA
TCGA.AC.A2FF	TCGA.AC.A2FF	TCGA.AC.A2FF.01	2759	0	40	FEMALE	NA	N1	II	T2	NA	NA	NA	NA	7	3	1.2076	low	less.50	NA	LumA
TCGA.AC.A2FG	TCGA.AC.A2FG	TCGA.AC.A2FG.01	1853	0	79	FEMALE	NA	N1	II	T2	NA	NA	NA	NA	11	1	0.563191	low	lager.50	NA	LumA
TCGA.AC.A2FK	TCGA.AC.A2FK	TCGA.AC.A2FK.01	2650	0	45	FEMALE	M0	N3	III	T2	NA	NA	NA	NA	3	3	0.205036	low	less.50	NA	Normal
TCGA.AC.A2FO	TCGA.AC.A2FO	TCGA.AC.A2FO.01	2255	0	65	FEMALE	NA	N1	II	T2	NA	NA	NA	NA	10	2	1.97807	low	lager.50	NA	LumA
TCGA.AC.A2QH	TCGA.AC.A2QH	TCGA.AC.A2QH.01	1005	0	58	FEMALE	NA	N0	II	T3	NA	NA	NA	NA	22	0	5.70708	high	lager.50	NA	Basal
TCGA.AC.A3HN	TCGA.AC.A3HN	TCGA.AC.A3HN.01	496	0	87	FEMALE	NA	N1	II	T2	NA	NA	NA	NA	3	2	10.2705	high	lager.50	NA	LumA
TCGA.AC.A3OD	TCGA.AC.A3OD	TCGA.AC.A3OD.01	451	0	68	FEMALE	NA	N1	II	T2	NA	NA	NA	NA	3	1	1.17968	low	lager.50	NA	LumA
TCGA.AO.A0J5	TCGA.AO.A0J5	TCGA.AO.A0J5.01	792	1	48	FEMALE	M1	N1	IV	T4	Positive	Negative	Negative	NA	2	2	8.51735	high	less.50	NA	LumA
TCGA.AO.A1KO	TCGA.AO.A1KO	TCGA.AO.A1KO.01	622	0	46	FEMALE	M0	N0	II	T3	Positive	Positive	Negative	NA	19	0	0.185571	low	less.50	NA	Normal
TCGA.AO.A1KP	TCGA.AO.A1KP	TCGA.AO.A1KP.01	2953	0	77	FEMALE	M0	N1	II	T1	Positive	Positive	Negative	NA	9	0	4.93204	high	lager.50	NA	LumB
TCGA.AO.A1KQ	TCGA.AO.A1KQ	TCGA.AO.A1KQ.01	1882	0	84	MALE	M0	N1	III	T4	Positive	Positive	Negative	NA	9	2	4.53575	low	lager.50	NA	LumB
TCGA.AO.A1KR	TCGA.AO.A1KR	TCGA.AO.A1KR.01	2513	0	51	FEMALE	M0	N0	II	T2	Negative	Negative	NA	NA	4	0	0.105875	low	lager.50	NA	Basal
TCGA.AO.A1KS	TCGA.AO.A1KS	TCGA.AO.A1KS.01	350	0	69	FEMALE	M0	N0	II	T2	Positive	Positive	Negative	NA	5	0	4.23704	low	lager.50	NA	LumB
TCGA.AO.A1KT	TCGA.AO.A1KT	TCGA.AO.A1KT.01	541	0	78	FEMALE	M0	N1	II	T1	Positive	Positive	Negative	NA	5	1	12.2527	high	lager.50	NA	LumB
TCGA.AQ.A0Y5	TCGA.AQ.A0Y5	TCGA.AQ.A0Y5.01	172	1	70	FEMALE	NA	N2	III	T2	Positive	Positive	Positive	NA	17	5	17.4876	high	lager.50	NA	LumA
TCGA.AQ.A1H2	TCGA.AQ.A1H2	TCGA.AQ.A1H2.01	475	0	84	FEMALE	NA	N2	III	T2	Positive	Positive	Positive	NA	19	13	2.98379	low	lager.50	NA	LumA
TCGA.AQ.A1H3	TCGA.AQ.A1H3	TCGA.AQ.A1H3.01	989	0	49	FEMALE	NA	N3	III	T2	Positive	Positive	Negative	NA	23	14	8.52411	high	less.50	NA	LumA
TCGA.AR.A24H	TCGA.AR.A24H	TCGA.AR.A24H.01	4894	0	65	FEMALE	M0	N0	II	T2	Positive	Positive	Negative	NA	4	0	5.72055	high	lager.50	NA	LumB
TCGA.AR.A24K	TCGA.AR.A24K	TCGA.AR.A24K.01	1548	0	46	FEMALE	M0	N0	II	T2	Positive	Positive	Negative	NA	2	0	4.13804	low	less.50	NA	LumB
TCGA.AR.A24L	TCGA.AR.A24L	TCGA.AR.A24L.01	2866	1	26	FEMALE	M0	N1	II	T2	Positive	Positive	Negative	NA	12	2	17.8883	high	less.50	NA	LumA
TCGA.AR.A24M	TCGA.AR.A24M	TCGA.AR.A24M.01	3660	0	38	FEMALE	M0	N2	III	T2	Positive	Positive	Negative	NA	28	4	6.7249	high	less.50	NA	LumA
TCGA.AR.A24N	TCGA.AR.A24N	TCGA.AR.A24N.01	3035	0	54	FEMALE	M0	N0	I	T1	Positive	Positive	Negative	NA	4	0	6.9512	high	lager.50	NA	LumB
TCGA.AR.A24O	TCGA.AR.A24O	TCGA.AR.A24O.01	3607	0	43	FEMALE	M0	N2	III	T3	Positive	Positive	Negative	NA	19	7	6.47225	high	less.50	NA	LumA
TCGA.AR.A24P	TCGA.AR.A24P	TCGA.AR.A24P.01	84	0	47	FEMALE	M0	N0	I	T1	Positive	Positive	Negative	NA	3	0	8.42494	high	less.50	NA	LumA
TCGA.AR.A24Q	TCGA.AR.A24Q	TCGA.AR.A24Q.01	3172	0	49	FEMALE	M0	N0	II	T3	Positive	Negative	Negative	NA	2	0	9.79864	high	less.50	NA	Basal
TCGA.AR.A24R	TCGA.AR.A24R	TCGA.AR.A24R.01	3430	0	45	FEMALE	M0	N2	III	T1	Positive	Positive	Negative	NA	28	6	8.44138	high	less.50	NA	LumB
TCGA.AR.A24S	TCGA.AR.A24S	TCGA.AR.A24S.01	2976	0	61	FEMALE	M0	N0	I	T1	Positive	Positive	Negative	NA	4	0	12.0987	high	lager.50	NA	LumB
TCGA.AR.A24T	TCGA.AR.A24T	TCGA.AR.A24T.01	3202	0	46	FEMALE	M0	N3	III	T3	Positive	Positive	Negative	NA	17	15	12.0103	high	less.50	NA	LumA
TCGA.AR.A24U	TCGA.AR.A24U	TCGA.AR.A24U.01	3128	0	47	FEMALE	M0	N1	II	T1	Negative	Negative	Positive	NA	25	2	8.21329	high	less.50	NA	Her2
TCGA.AR.A24V	TCGA.AR.A24V	TCGA.AR.A24V.01	3203	0	52	FEMALE	M0	N1	II	T2	Positive	Positive	Negative	NA	2	1	24.2498	high	lager.50	NA	LumA
TCGA.AR.A24W	TCGA.AR.A24W	TCGA.AR.A24W.01	991	0	55	FEMALE	M0	N1	II	T2	NA	NA	NA	NA	22	3	5.08496	high	lager.50	NA	LumA
TCGA.AR.A24X	TCGA.AR.A24X	TCGA.AR.A24X.01	3004	0	52	FEMALE	M0	N0	II	T2	Positive	Positive	Negative	NA	7	0	10.0397	high	lager.50	NA	LumA
TCGA.AR.A24Z	TCGA.AR.A24Z	TCGA.AR.A24Z.01	3001	0	57	FEMALE	M0	N0	II	T2	Positive	Positive	Negative	NA	8	0	16.6807	high	lager.50	NA	LumB
TCGA.AR.A250	TCGA.AR.A250	TCGA.AR.A250.01	2707	0	58	FEMALE	M0	N0	II	T2	Positive	Negative	Positive	NA	4	0	18.7835	high	lager.50	NA	LumB
TCGA.AR.A251	TCGA.AR.A251	TCGA.AR.A251.01	3030	0	51	FEMALE	M0	N2	III	T2	Positive	Negative	Negative	NA	7	4	5.69965	high	lager.50	NA	Basal
TCGA.AR.A252	TCGA.AR.A252	TCGA.AR.A252.01	2838	0	50	FEMALE	M0	N0	I	T1	Positive	Positive	Negative	NA	4	0	3.48768	low	lager.50	NA	LumA
TCGA.AR.A254	TCGA.AR.A254	TCGA.AR.A254.01	2605	0	50	FEMALE	M0	N2	III	T2	Positive	Positive	Positive	NA	30	9	10.7986	high	lager.50	NA	Her2
TCGA.AR.A255	TCGA.AR.A255	TCGA.AR.A255.01	2161	0	62	FEMALE	M0	N0	I	T1	Positive	Positive	Positive	NA	2	0	9.68534	high	lager.50	NA	LumA
TCGA.AR.A256	TCGA.AR.A256	TCGA.AR.A256.01	2854	1	45	FEMALE	M0	N0	II	T2	Negative	Negative	Negative	NA	5	0	8.15021	high	less.50	NA	Basal
TCGA.AR.A2LE	TCGA.AR.A2LE	TCGA.AR.A2LE.01	5062	0	69	FEMALE	M0	N0	I	T1	NA	NA	NA	NA	2	0	2.39795	low	lager.50	NA	LumA
TCGA.AR.A2LH	TCGA.AR.A2LH	TCGA.AR.A2LH.01	616	1	55	FEMALE	M0	N3	III	T3	NA	NA	NA	NA	39	29	0.950809	low	lager.50	NA	Normal
TCGA.AR.A2LK	TCGA.AR.A2LK	TCGA.AR.A2LK.01	1649	1	62	FEMALE	M0	N2	III	T3	NA	NA	NA	NA	18	5	10.5843	high	lager.50	NA	LumB
TCGA.AR.A2LL	TCGA.AR.A2LL	TCGA.AR.A2LL.01	2012	0	70	FEMALE	M0	N0	II	T3	NA	NA	NA	NA	4	0	1.76486	low	lager.50	NA	LumB
TCGA.AR.A2LM	TCGA.AR.A2LM	TCGA.AR.A2LM.01	1935	0	49	FEMALE	M0	N1	II	T1	NA	NA	NA	NA	3	1	5.18856	high	less.50	NA	LumA
TCGA.AR.A2LN	TCGA.AR.A2LN	TCGA.AR.A2LN.01	1161	0	65	FEMALE	M0	N0	II	T2	NA	NA	NA	NA	2	0	4.17631	low	lager.50	NA	LumA
TCGA.AR.A2LO	TCGA.AR.A2LO	TCGA.AR.A2LO.01	1198	0	46	FEMALE	M0	N1	II	T2	NA	NA	NA	NA	16	1	2.6004	low	less.50	NA	LumA
TCGA.AR.A2LQ	TCGA.AR.A2LQ	TCGA.AR.A2LQ.01	1233	0	59	FEMALE	M0	N0	II	T3	NA	NA	NA	NA	3	0	7.94538	high	lager.50	NA	Normal
TCGA.AR.A2LR	TCGA.AR.A2LR	TCGA.AR.A2LR.01	1742	0	49	FEMALE	M0	N0	I	T1	NA	NA	NA	NA	4	0	6.45397	high	less.50	NA	Basal
TCGA.B6.A1KC	TCGA.B6.A1KC	TCGA.B6.A1KC.01	1326	0	67	FEMALE	M0	N1	II	T2	Positive	Negative	NA	NA	2	1	0.414798	low	lager.50	NA	LumB
TCGA.B6.A1KF	TCGA.B6.A1KF	TCGA.B6.A1KF.01	3088	0	68	FEMALE	M0	N1	II	T2	Negative	Negative	Positive	NA	14	2	1.47103	low	lager.50	NA	Basal
TCGA.B6.A1KN	TCGA.B6.A1KN	TCGA.B6.A1KN.01	4233	0	57	FEMALE	M0	N1	III	T4	Negative	Negative	Positive	NA	30	24	3.93449	low	lager.50	NA	LumB
TCGA.B6.A2IU	TCGA.B6.A2IU	TCGA.B6.A2IU.01	5176	0	62	FEMALE	M0	N0	II	T2	NA	NA	NA	YES	28	0	2.07117	low	lager.50	NA	LumA
TCGA.BH.A0DV	TCGA.BH.A0DV	TCGA.BH.A0DV.01	2064	0	54	FEMALE	M0	N2	III	T2	Positive	Positive	Negative	NA	9	9	6.8436	high	lager.50	NA	LumA
TCGA.BH.A1EN	TCGA.BH.A1EN	TCGA.BH.A1EN.01	2127	1	78	FEMALE	M0	NA	II	T2	Negative	Negative	Positive	NA	NA	NA	5.84069	high	lager.50	NA	Her2
TCGA.BH.A1EX	TCGA.BH.A1EX	TCGA.BH.A1EX.01	1508	1	67	FEMALE	M0	N1	II	T2	Positive	Positive	Negative	NA	24	2	10.338	high	lager.50	NA	LumA
TCGA.BH.A1EY	TCGA.BH.A1EY	TCGA.BH.A1EY.01	538	1	79	FEMALE	M0	N0	II	T2	Positive	Positive	Negative	NA	12	0	8.50841	high	lager.50	NA	LumA
TCGA.BH.A1F2	TCGA.BH.A1F2	TCGA.BH.A1F2.01	959	1	53	FEMALE	M0	N1	III	T4	Positive	Positive	Positive	NA	19	6	42.566	high	lager.50	NA	LumB
TCGA.BH.A1F5	TCGA.BH.A1F5	TCGA.BH.A1F5.01	2712	1	62	FEMALE	M0	N1	II	T1	Positive	Positive	NA	NA	4	1	6.28237	high	lager.50	NA	LumA
TCGA.BH.A1F6	TCGA.BH.A1F6	TCGA.BH.A1F6.01	2965	1	51	FEMALE	NA	N2	NA	T4	Negative	Negative	NA	NA	6	6	3.65548	low	lager.50	NA	Basal
TCGA.BH.A1F8	TCGA.BH.A1F8	TCGA.BH.A1F8.01	763	1	90	FEMALE	M0	N2	III	T4	Positive	Positive	Negative	NA	13	12	12.3449	high	lager.50	NA	LumB
TCGA.BH.A1FB	TCGA.BH.A1FB	TCGA.BH.A1FB.01	3669	1	60	FEMALE	M0	N1	II	T2	Positive	Positive	Negative	NA	15	0	7.76518	high	lager.50	NA	LumA
TCGA.BH.A1FC	TCGA.BH.A1FC	TCGA.BH.A1FC.01	3472	1	78	FEMALE	M0	N1	II	T1	Negative	Negative	Negative	NA	23	1	1.3274	low	lager.50	NA	Basal
TCGA.BH.A1FD	TCGA.BH.A1FD	TCGA.BH.A1FD.01	1009	1	68	FEMALE	M0	N0	I	T1	Positive	Positive	Negative	NA	19	0	16.0843	high	lager.50	NA	LumB
TCGA.BH.A1FE	TCGA.BH.A1FE	TCGA.BH.A1FE.01	2273	1	31	FEMALE	M0	N1	II	T2	Positive	Positive	Negative	NA	12	1	11.4769	high	less.50	NA	LumA
TCGA.BH.A1FG	TCGA.BH.A1FG	TCGA.BH.A1FG.01	3736	1	88	FEMALE	M0	NA	I	T1	Positive	Positive	NA	NA	NA	NA	2.17934	low	lager.50	NA	LumA
TCGA.BH.A1FH	TCGA.BH.A1FH	TCGA.BH.A1FH.01	1034	1	47	FEMALE	M1	N1	IV	T2	Positive	Negative	Negative	NA	13	8	7.55987	high	less.50	NA	LumA
TCGA.BH.A1FJ	TCGA.BH.A1FJ	TCGA.BH.A1FJ.01	1927	1	66	FEMALE	M0	N1	III	T3	Negative	Positive	Negative	NA	35	6	7.72668	high	lager.50	NA	LumB
TCGA.BH.A1FL	TCGA.BH.A1FL	TCGA.BH.A1FL.01	1673	1	69	FEMALE	M0	N1	II	T2	Positive	Positive	Negative	NA	22	4	4.10937	low	lager.50	NA	LumA
TCGA.BH.A1FM	TCGA.BH.A1FM	TCGA.BH.A1FM.01	1388	1	44	FEMALE	M0	N2	III	T2	Positive	Negative	Negative	NA	10	8	25.7666	high	less.50	NA	LumB
TCGA.BH.A1FN	TCGA.BH.A1FN	TCGA.BH.A1FN.01	2192	1	34	FEMALE	M0	N0	II	T2	Positive	Positive	Negative	NA	29	0	7.67356	high	less.50	NA	LumB
TCGA.BH.A1FR	TCGA.BH.A1FR	TCGA.BH.A1FR.01	1642	1	73	FEMALE	M0	N1	III	T4	Positive	Positive	Negative	NA	10	4	1.5338	low	lager.50	NA	LumA
TCGA.BH.A1FU	TCGA.BH.A1FU	TCGA.BH.A1FU.01	1688	1	44	FEMALE	M0	N0	I	T1	Negative	Negative	Positive	NA	5	0	10.7734	high	less.50	NA	Normal
TCGA.BH.A201	TCGA.BH.A201	TCGA.BH.A201.01	856	0	64	FEMALE	M0	N0	I	T1	Positive	Positive	NA	NA	2	0	8.31959	high	lager.50	NA	LumA
TCGA.BH.A202	TCGA.BH.A202	TCGA.BH.A202.01	795	0	60	FEMALE	M0	N0	II	T2	Positive	Positive	NA	NA	4	0	3.20291	low	lager.50	NA	LumB
TCGA.BH.A203	TCGA.BH.A203	TCGA.BH.A203.01	1174	1	78	FEMALE	M0	N1	II	T2	NA	NA	NA	NA	39	35	10.5715	high	lager.50	NA	Her2
TCGA.BH.A204	TCGA.BH.A204	TCGA.BH.A204.01	2534	1	80	FEMALE	M0	N1	II	T2	NA	NA	NA	NA	16	2	19.3979	high	lager.50	NA	LumB
TCGA.BH.A208	TCGA.BH.A208	TCGA.BH.A208.01	1759	1	48	FEMALE	M0	N1	II	T2	NA	NA	NA	NA	15	3	15.3589	high	less.50	NA	Normal
TCGA.BH.A209	TCGA.BH.A209	TCGA.BH.A209.01	3959	1	77	FEMALE	M0	N0	I	T1	Positive	Positive	NA	NA	12	0	1.19182	low	lager.50	NA	LumB
TCGA.BH.A28Q	TCGA.BH.A28Q	TCGA.BH.A28Q.01	1119	0	46	FEMALE	M0	N1	II	T2	Positive	Positive	NA	NA	18	2	5.94736	high	less.50	NA	LumA
TCGA.BH.A2L8	TCGA.BH.A2L8	TCGA.BH.A2L8.01	612	0	45	FEMALE	M0	N0	II	T2	NA	NA	NA	NA	1	0	5.27563	high	less.50	NA	LumA
TCGA.C8.A1HE	TCGA.C8.A1HE	TCGA.C8.A1HE.01	375	0	59	FEMALE	M0	N0	II	T2	Positive	Positive	Negative	NA	5	NA	2.13494	low	lager.50	NA	LumA
TCGA.C8.A1HJ	TCGA.C8.A1HJ	TCGA.C8.A1HJ.01	5	0	53	FEMALE	M0	N0	II	T2	Negative	Negative	Negative	NA	10	NA	2.48273	low	lager.50	NA	Basal
TCGA.C8.A1HK	TCGA.C8.A1HK	TCGA.C8.A1HK.01	366	0	53	FEMALE	M0	N1	II	T2	Negative	Negative	Positive	NA	8	NA	2.93609	low	lager.50	NA	Her2
TCGA.C8.A1HO	TCGA.C8.A1HO	TCGA.C8.A1HO.01	375	0	34	FEMALE	M0	N3	III	T3	Positive	Positive	Negative	NA	NA	NA	1.79972	low	less.50	NA	LumA
TCGA.C8.A26V	TCGA.C8.A26V	TCGA.C8.A26V.01	616	0	47	FEMALE	M0	N2	III	T3	Positive	Positive	Negative	NA	NA	NA	3.65284	low	less.50	NA	LumB
TCGA.C8.A26W	TCGA.C8.A26W	TCGA.C8.A26W.01	381	0	58	FEMALE	M0	N1	II	T2	Positive	Positive	Positive	NA	NA	NA	5.41584	high	lager.50	NA	LumB
TCGA.C8.A26X	TCGA.C8.A26X	TCGA.C8.A26X.01	376	0	58	FEMALE	M0	N1	II	T1	Negative	Negative	Negative	NA	NA	NA	3.35234	low	lager.50	NA	Her2
TCGA.C8.A26Y	TCGA.C8.A26Y	TCGA.C8.A26Y.01	394	0	90	FEMALE	M0	N0	II	T2	Negative	Negative	Negative	NA	NA	NA	2.84657	low	lager.50	NA	Her2
TCGA.C8.A26Z	TCGA.C8.A26Z	TCGA.C8.A26Z.01	470	0	59	FEMALE	M0	N0	II	T2	Positive	Positive	Negative	NA	NA	NA	4.7311	high	lager.50	NA	LumA
TCGA.C8.A273	TCGA.C8.A273	TCGA.C8.A273.01	513	0	29	FEMALE	M0	N1	II	T2	Positive	Positive	Negative	NA	7	2	7.48944	high	less.50	NA	LumA
TCGA.C8.A274	TCGA.C8.A274	TCGA.C8.A274.01	508	0	63	FEMALE	M0	N0	II	T2	Positive	Positive	Negative	NA	NA	NA	2.81676	low	lager.50	NA	LumB
TCGA.C8.A275	TCGA.C8.A275	TCGA.C8.A275.01	1	0	56	FEMALE	M0	N1	II	T1	NA	NA	Positive	NA	NA	NA	4.85012	high	lager.50	NA	Her2
TCGA.C8.A278	TCGA.C8.A278	TCGA.C8.A278.01	297	0	61	FEMALE	M0	N2	III	T2	Negative	Negative	Positive	NA	NA	NA	4.04376	low	lager.50	NA	Her2
TCGA.C8.A27A	TCGA.C8.A27A	TCGA.C8.A27A.01	747	0	48	FEMALE	M0	N1	II	T2	Positive	Positive	Negative	NA	NA	NA	2.58039	low	less.50	NA	LumB
TCGA.C8.A27B	TCGA.C8.A27B	TCGA.C8.A27B.01	439	0	48	FEMALE	M0	N0	II	T3	Negative	Negative	Negative	NA	NA	NA	1.26866	low	less.50	NA	Basal
TCGA.C8.A3M7	TCGA.C8.A3M7	TCGA.C8.A3M7.01	1034	1	60	FEMALE	M0	N0	III	T4	NA	NA	NA	NO	6	0	0.479833	low	lager.50	NA	LumA
TCGA.C8.A3M8	TCGA.C8.A3M8	TCGA.C8.A3M8.01	394	0	68	FEMALE	M0	N0	I	T1	NA	NA	NA	NA	NA	NA	6.50244	high	lager.50	NA	LumB
TCGA.D8.A146	TCGA.D8.A146	TCGA.D8.A146.01	643	0	57	FEMALE	NA	N0	II	T2	Positive	Positive	Negative	NA	11	0	9.51827	high	lager.50	NA	LumA
TCGA.D8.A1J8	TCGA.D8.A1J8	TCGA.D8.A1J8.01	431	0	77	FEMALE	M0	N1	II	T2	Positive	Positive	Negative	NA	16	3	11.7641	high	lager.50	NA	LumB
TCGA.D8.A1J9	TCGA.D8.A1J9	TCGA.D8.A1J9.01	532	0	48	FEMALE	M0	N0	I	T1	Positive	Negative	Positive	NA	6	0	8.97197	high	less.50	NA	LumB
TCGA.D8.A1JA	TCGA.D8.A1JA	TCGA.D8.A1JA.01	502	0	60	FEMALE	M0	NA	NA	T4	Negative	Negative	Positive	NO	NA	NA	1.61872	low	lager.50	NA	Her2
TCGA.D8.A1JB	TCGA.D8.A1JB	TCGA.D8.A1JB.01	1688	0	54	FEMALE	M0	N1	II	T2	Positive	Positive	Positive	NA	8	1	1.95221	low	lager.50	NA	LumA
TCGA.D8.A1JC	TCGA.D8.A1JC	TCGA.D8.A1JC.01	480	0	59	FEMALE	M0	N2	III	T2	Positive	Positive	Negative	NA	11	4	7.27649	high	lager.50	NA	LumB
TCGA.D8.A1JD	TCGA.D8.A1JD	TCGA.D8.A1JD.01	552	0	41	FEMALE	M0	N1	II	T2	Positive	Positive	Negative	NA	14	3	12.7718	high	less.50	NA	LumB
TCGA.D8.A1JE	TCGA.D8.A1JE	TCGA.D8.A1JE.01	575	0	62	FEMALE	M0	N1	II	T1	Positive	Positive	Negative	NA	10	3	10.0714	high	lager.50	NA	LumB
TCGA.D8.A1JF	TCGA.D8.A1JF	TCGA.D8.A1JF.01	366	0	79	FEMALE	M0	N2	III	T1	Negative	Negative	Negative	NA	25	8	4.22612	low	lager.50	NA	Her2
TCGA.D8.A1JG	TCGA.D8.A1JG	TCGA.D8.A1JG.01	1612	0	62	FEMALE	M0	N0	II	T2	Negative	Negative	Negative	NA	1	0	4.182	low	lager.50	NA	Her2
TCGA.D8.A1JH	TCGA.D8.A1JH	TCGA.D8.A1JH.01	426	0	56	FEMALE	M0	N0	I	T1	Positive	Positive	Negative	NA	9	NA	11.8271	high	lager.50	NA	LumA
TCGA.D8.A1JI	TCGA.D8.A1JI	TCGA.D8.A1JI.01	577	0	54	FEMALE	NA	N1	II	T1	Positive	Positive	Negative	NA	22	2	0.418048	low	lager.50	NA	LumB
TCGA.D8.A1JJ	TCGA.D8.A1JJ	TCGA.D8.A1JJ.01	611	0	54	FEMALE	M0	N0	II	T2	Positive	Positive	Negative	NA	1	0	16.4919	high	lager.50	NA	LumB
TCGA.D8.A1JK	TCGA.D8.A1JK	TCGA.D8.A1JK.01	612	0	90	FEMALE	M0	N0	II	T2	Negative	Positive	Negative	NA	13	0	3.43088	low	lager.50	NA	Basal
TCGA.D8.A1JL	TCGA.D8.A1JL	TCGA.D8.A1JL.01	611	0	72	FEMALE	M0	N0	II	T2	Negative	Negative	Negative	NA	11	0	5.80057	high	lager.50	NA	Basal
TCGA.D8.A1JM	TCGA.D8.A1JM	TCGA.D8.A1JM.01	590	0	59	FEMALE	M0	N1	II	T2	Positive	Negative	Negative	NA	11	3	0.156151	low	lager.50	NA	Basal
TCGA.D8.A1JN	TCGA.D8.A1JN	TCGA.D8.A1JN.01	620	0	80	FEMALE	NA	N3	III	T3	Positive	Positive	Negative	NA	13	11	0.353105	low	lager.50	NA	LumA
TCGA.D8.A1JP	TCGA.D8.A1JP	TCGA.D8.A1JP.01	639	0	73	FEMALE	M0	N0	I	T1	Positive	Positive	Negative	NA	1	NA	7.79544	high	lager.50	NA	LumA
TCGA.D8.A1JS	TCGA.D8.A1JS	TCGA.D8.A1JS.01	371	0	77	FEMALE	M0	N0	I	T1	Positive	Positive	Negative	NA	13	0	0.377188	low	lager.50	NA	LumA
TCGA.D8.A1JT	TCGA.D8.A1JT	TCGA.D8.A1JT.01	405	0	70	FEMALE	M0	N0	II	T2	Positive	Positive	Negative	NA	15	0	1.15945	low	lager.50	NA	LumB
TCGA.D8.A1JU	TCGA.D8.A1JU	TCGA.D8.A1JU.01	447	0	51	FEMALE	M0	N0	I	T1	Positive	Positive	Negative	NA	1	0	4.64776	low	lager.50	NA	LumA
TCGA.D8.A1X5	TCGA.D8.A1X5	TCGA.D8.A1X5.01	565	0	81	FEMALE	NA	N3	III	T2	Positive	Positive	Positive	NA	16	14	13.9797	high	lager.50	NA	LumB
TCGA.D8.A1X6	TCGA.D8.A1X6	TCGA.D8.A1X6.01	541	0	80	FEMALE	NA	N2	III	T3	Positive	Positive	Negative	NA	7	5	2.73189	low	lager.50	NA	LumB
TCGA.D8.A1X7	TCGA.D8.A1X7	TCGA.D8.A1X7.01	509	0	40	FEMALE	NA	N0	II	T2	Positive	Positive	Negative	NA	3	0	6.77062	high	less.50	NA	LumB
TCGA.D8.A1X8	TCGA.D8.A1X8	TCGA.D8.A1X8.01	783	0	62	FEMALE	M0	N2	III	T1	Positive	NA	Negative	NA	11	9	3.47334	low	lager.50	NA	LumA
TCGA.D8.A1X9	TCGA.D8.A1X9	TCGA.D8.A1X9.01	727	0	66	FEMALE	M0	N1	II	T2	Positive	Positive	Negative	NA	23	3	29.0712	high	lager.50	NA	LumA
TCGA.D8.A1XA	TCGA.D8.A1XA	TCGA.D8.A1XA.01	839	0	64	FEMALE	M0	N0	I	T1	Positive	Positive	Negative	NA	1	0	5.29581	high	lager.50	NA	LumA
TCGA.D8.A1XB	TCGA.D8.A1XB	TCGA.D8.A1XB.01	552	0	62	FEMALE	M0	N1	II	T2	Positive	Positive	Negative	NA	10	1	11.1381	high	lager.50	NA	LumA
TCGA.D8.A1XC	TCGA.D8.A1XC	TCGA.D8.A1XC.01	377	1	85	FEMALE	M0	N1	III	T4	Positive	Positive	Negative	NA	20	1	0.595576	low	lager.50	NA	LumA
TCGA.D8.A1XD	TCGA.D8.A1XD	TCGA.D8.A1XD.01	522	0	36	FEMALE	M0	N2	III	T1	Positive	Positive	Negative	NA	18	6	8.68457	high	less.50	NA	LumA
TCGA.D8.A1XF	TCGA.D8.A1XF	TCGA.D8.A1XF.01	463	0	45	FEMALE	M0	N0	II	T2	Positive	Positive	Negative	NA	8	0	0.598014	low	less.50	NA	LumB
TCGA.D8.A1XG	TCGA.D8.A1XG	TCGA.D8.A1XG.01	448	0	86	FEMALE	M0	N1	III	T4	Positive	Negative	Negative	NA	2	2	10.104	high	lager.50	NA	LumA
TCGA.D8.A1XJ	TCGA.D8.A1XJ	TCGA.D8.A1XJ.01	663	0	76	FEMALE	NA	N1	III	T3	Positive	Positive	Positive	NA	43	2	4.49846	low	lager.50	NA	Her2
TCGA.D8.A1XK	TCGA.D8.A1XK	TCGA.D8.A1XK.01	441	0	55	FEMALE	NA	N1	II	T2	Negative	Negative	Negative	NA	18	3	1.00339	low	lager.50	NA	Basal
TCGA.D8.A1XL	TCGA.D8.A1XL	TCGA.D8.A1XL.01	606	0	34	FEMALE	NA	N1	II	T2	Positive	Positive	Negative	NA	13	2	1.52222	low	less.50	NA	LumB
TCGA.D8.A1XM	TCGA.D8.A1XM	TCGA.D8.A1XM.01	538	0	57	FEMALE	M0	N0	I	T1	Positive	Positive	Negative	NA	1	0	15.1461	high	lager.50	NA	LumA
TCGA.D8.A1XO	TCGA.D8.A1XO	TCGA.D8.A1XO.01	1682	0	56	FEMALE	M0	N1	II	T2	Positive	Positive	Negative	NA	10	1	9.58633	high	lager.50	NA	LumA
TCGA.D8.A1XQ	TCGA.D8.A1XQ	TCGA.D8.A1XQ.01	499	0	69	FEMALE	M0	N0	II	T2	Negative	Negative	Negative	NA	7	0	3.62374	low	lager.50	NA	Basal
TCGA.D8.A1XR	TCGA.D8.A1XR	TCGA.D8.A1XR.01	482	0	56	FEMALE	M0	N1	II	T2	Positive	Positive	Negative	NA	7	2	9.2649	high	lager.50	NA	LumB
TCGA.D8.A1XS	TCGA.D8.A1XS	TCGA.D8.A1XS.01	496	0	48	MALE	M0	N3	III	T2	Positive	Positive	Positive	NA	28	25	13.1908	high	less.50	NA	LumB
TCGA.D8.A1XT	TCGA.D8.A1XT	TCGA.D8.A1XT.01	506	0	61	FEMALE	M0	N1	II	T1	Negative	Negative	Positive	NA	10	3	19.3962	high	lager.50	NA	Her2
TCGA.D8.A1XU	TCGA.D8.A1XU	TCGA.D8.A1XU.01	395	0	56	FEMALE	M0	N0	I	T1	Positive	Positive	Negative	NA	1	0	7.90113	high	lager.50	NA	LumA
TCGA.D8.A1XV	TCGA.D8.A1XV	TCGA.D8.A1XV.01	461	0	84	FEMALE	M0	N0	II	T2	Positive	Positive	Negative	NA	1	0	1.096	low	lager.50	NA	LumA
TCGA.D8.A1XW	TCGA.D8.A1XW	TCGA.D8.A1XW.01	1309	0	53	FEMALE	M0	N0	II	T2	Negative	Positive	Negative	NA	1	0	2.43196	low	lager.50	NA	Normal
TCGA.D8.A1XY	TCGA.D8.A1XY	TCGA.D8.A1XY.01	503	0	74	FEMALE	NA	N0	II	T2	Positive	Positive	Positive	NA	3	0	35.1412	high	lager.50	NA	LumA
TCGA.D8.A1XZ	TCGA.D8.A1XZ	TCGA.D8.A1XZ.01	466	0	81	FEMALE	NA	N2	III	T1	Positive	Negative	Negative	NA	14	6	19.8286	high	lager.50	NA	LumB
TCGA.D8.A1Y0	TCGA.D8.A1Y0	TCGA.D8.A1Y0.01	472	0	65	FEMALE	NA	N2	III	T1	Positive	Positive	Negative	NA	15	9	3.60054	low	lager.50	NA	LumA
TCGA.D8.A1Y1	TCGA.D8.A1Y1	TCGA.D8.A1Y1.01	302	1	80	FEMALE	NA	N1	III	T3	Positive	Positive	Negative	NA	22	1	18.7125	high	lager.50	NA	LumB
TCGA.D8.A1Y2	TCGA.D8.A1Y2	TCGA.D8.A1Y2.01	433	0	71	FEMALE	NA	N0	II	T2	Positive	Positive	Negative	NA	7	0	12.5849	high	lager.50	NA	LumB
TCGA.D8.A1Y3	TCGA.D8.A1Y3	TCGA.D8.A1Y3.01	430	0	61	FEMALE	NA	N2	III	T2	Positive	Positive	Negative	NA	8	5	0.879428	low	lager.50	NA	LumB
TCGA.D8.A27E	TCGA.D8.A27E	TCGA.D8.A27E.01	530	0	66	FEMALE	M0	N0	I	T1	Positive	Positive	Negative	NA	1	0	1.59855	low	lager.50	NA	LumA
TCGA.D8.A27F	TCGA.D8.A27F	TCGA.D8.A27F.01	488	0	40	FEMALE	M0	N0	II	T2	Negative	Negative	Negative	NA	11	0	2.66778	low	less.50	NA	Basal
TCGA.D8.A27G	TCGA.D8.A27G	TCGA.D8.A27G.01	409	0	75	FEMALE	M0	N0	II	T2	Positive	Positive	Negative	NA	31	0	7.06399	high	lager.50	NA	LumA
TCGA.D8.A27H	TCGA.D8.A27H	TCGA.D8.A27H.01	397	0	72	FEMALE	M0	N0	II	T2	Negative	Negative	Negative	NA	1	NA	10.9597	high	lager.50	NA	Basal
TCGA.D8.A27I	TCGA.D8.A27I	TCGA.D8.A27I.01	439	0	58	FEMALE	M0	N2	III	T1	Positive	Positive	Negative	NA	10	4	3.69947	low	lager.50	NA	LumA
TCGA.D8.A27K	TCGA.D8.A27K	TCGA.D8.A27K.01	1461	0	47	FEMALE	M0	N1	II	T2	Positive	Positive	Negative	NA	17	2	3.12201	low	less.50	NA	LumA
TCGA.D8.A27L	TCGA.D8.A27L	TCGA.D8.A27L.01	499	0	49	FEMALE	M0	N2	III	T1	Positive	Positive	Negative	NA	16	2	8.72959	high	less.50	NA	LumA
TCGA.D8.A27M	TCGA.D8.A27M	TCGA.D8.A27M.01	410	0	59	FEMALE	M0	N0	I	T1	Negative	Negative	Negative	NA	1	NA	13.5249	high	lager.50	NA	Basal
TCGA.D8.A27N	TCGA.D8.A27N	TCGA.D8.A27N.01	519	0	36	FEMALE	M0	N2	III	T2	Positive	Positive	Positive	NA	19	4	12.0975	high	less.50	NA	LumB
TCGA.D8.A27P	TCGA.D8.A27P	TCGA.D8.A27P.01	49	0	64	FEMALE	M0	N0	I	T1	Positive	Positive	Negative	NA	1	0	3.10155	low	lager.50	NA	LumA
TCGA.D8.A27R	TCGA.D8.A27R	TCGA.D8.A27R.01	29	0	41	FEMALE	M0	N3	III	T2	Positive	Positive	Negative	NA	11	11	3.37801	low	less.50	NA	LumB
TCGA.D8.A27T	TCGA.D8.A27T	TCGA.D8.A27T.01	398	0	53	FEMALE	M0	N3	III	T2	Positive	Positive	Negative	NA	12	12	9.22701	high	lager.50	NA	LumA
TCGA.D8.A27V	TCGA.D8.A27V	TCGA.D8.A27V.01	381	0	62	FEMALE	M0	N0	II	T2	Positive	Positive	Negative	NA	2	0	2.40695	low	lager.50	NA	LumA
TCGA.D8.A27W	TCGA.D8.A27W	TCGA.D8.A27W.01	373	0	55	FEMALE	M0	N0	III	T4	Positive	Positive	Positive	NA	12	0	2.61217	low	lager.50	NA	LumB
TCGA.E2.A1IE	TCGA.E2.A1IE	TCGA.E2.A1IE.01	2362	0	61	FEMALE	M0	N1	II	T2	Positive	Positive	Negative	YES	3	1	3.24297	low	lager.50	NA	LumA
TCGA.E2.A1IF	TCGA.E2.A1IF	TCGA.E2.A1IF.01	1138	0	74	FEMALE	M0	N0	I	T1	Positive	Positive	Negative	NA	4	0	5.13729	high	lager.50	NA	LumA
TCGA.E2.A1IG	TCGA.E2.A1IG	TCGA.E2.A1IG.01	2140	0	45	FEMALE	M0	N1	II	T2	Positive	Positive	NA	NA	3	1	25.5565	high	less.50	NA	LumA
TCGA.E2.A1IH	TCGA.E2.A1IH	TCGA.E2.A1IH.01	1026	0	80	FEMALE	M0	N0	I	T1	Positive	Positive	Negative	NA	2	0	21.8895	high	lager.50	NA	LumA
TCGA.E2.A1II	TCGA.E2.A1II	TCGA.E2.A1II.01	1025	0	51	FEMALE	M0	N0	I	T1	Negative	Positive	Negative	NA	5	0	1.19811	low	lager.50	NA	Basal
TCGA.E2.A1IJ	TCGA.E2.A1IJ	TCGA.E2.A1IJ.01	865	0	57	FEMALE	M0	N0	I	T1	Positive	Positive	Negative	NA	3	0	8.31194	high	lager.50	NA	LumA
TCGA.E2.A1IK	TCGA.E2.A1IK	TCGA.E2.A1IK.01	1800	0	71	FEMALE	M0	N1	II	T1	Positive	Positive	Negative	NA	6	1	0.556793	low	lager.50	NA	LumA
TCGA.E2.A1IL	TCGA.E2.A1IL	TCGA.E2.A1IL.01	118	0	78	FEMALE	M0	N1	II	T1	Positive	Positive	Negative	NA	4	1	7.69316	high	lager.50	NA	LumA
TCGA.E2.A1IN	TCGA.E2.A1IN	TCGA.E2.A1IN.01	675	0	60	FEMALE	M0	N0	I	T1	Positive	Positive	Negative	NA	2	0	15.4368	high	lager.50	NA	LumA
TCGA.E2.A1IO	TCGA.E2.A1IO	TCGA.E2.A1IO.01	1855	0	37	FEMALE	M0	N0	I	T1	Positive	Positive	Negative	NA	1	0	9.04674	high	less.50	NA	LumA
TCGA.E2.A1IU	TCGA.E2.A1IU	TCGA.E2.A1IU.01	337	0	60	FEMALE	M0	N0	I	T1	Positive	Positive	Negative	NA	11	0	1.60369	low	lager.50	NA	LumA
TCGA.E2.A1L6	TCGA.E2.A1L6	TCGA.E2.A1L6.01	1648	0	44	FEMALE	M0	N1	II	T1	Positive	Positive	Negative	NA	6	1	3.11147	low	less.50	NA	LumA
TCGA.E2.A1L7	TCGA.E2.A1L7	TCGA.E2.A1L7.01	1836	0	40	FEMALE	M0	N2	III	T2	Negative	Negative	Negative	NO	20	7	1.98206	low	less.50	NA	LumB
TCGA.E2.A1L8	TCGA.E2.A1L8	TCGA.E2.A1L8.01	2240	0	52	FEMALE	M0	N1	II	T2	Positive	Positive	Negative	NA	13	2	5.77841	high	lager.50	NA	LumA
TCGA.E2.A1L9	TCGA.E2.A1L9	TCGA.E2.A1L9.01	598	0	40	FEMALE	M0	N1	II	T1	Positive	Positive	Negative	NA	2	1	24.6861	high	less.50	NA	LumA
TCGA.E2.A1LA	TCGA.E2.A1LA	TCGA.E2.A1LA.01	748	0	59	FEMALE	M0	N1	II	T1	Positive	Positive	Negative	NA	35	1	2.67892	low	lager.50	NA	LumA
TCGA.E2.A1LB	TCGA.E2.A1LB	TCGA.E2.A1LB.01	2306	0	41	FEMALE	M0	N1	II	T2	Negative	Negative	Positive	NA	25	2	2.0438	low	less.50	NA	Her2
TCGA.E2.A1LG	TCGA.E2.A1LG	TCGA.E2.A1LG.01	1523	0	50	FEMALE	M0	N0	II	T2	Negative	Negative	Negative	NA	19	0	2.0727	low	lager.50	NA	Basal
TCGA.E2.A1LH	TCGA.E2.A1LH	TCGA.E2.A1LH.01	3247	0	59	FEMALE	M0	N0	I	T1	Negative	Negative	Negative	NA	2	0	1.03391	low	lager.50	NA	Basal
TCGA.E2.A1LI	TCGA.E2.A1LI	TCGA.E2.A1LI.01	3121	0	57	FEMALE	M0	N1	II	T2	Negative	Negative	Negative	NA	2	0	0.63551	low	lager.50	NA	Basal
TCGA.E2.A1LK	TCGA.E2.A1LK	TCGA.E2.A1LK.01	266	1	84	FEMALE	M0	N3	III	T4	Negative	Negative	Negative	NO	15	11	3.03761	low	lager.50	NA	Basal
TCGA.E2.A1LL	TCGA.E2.A1LL	TCGA.E2.A1LL.01	1309	0	73	FEMALE	NA	N2	III	T3	Negative	Negative	Negative	NO	44	5	0.47436	low	lager.50	NA	Basal
TCGA.E2.A1LS	TCGA.E2.A1LS	TCGA.E2.A1LS.01	1604	0	46	FEMALE	M0	N0	I	T1	Negative	Negative	Negative	NA	5	0	0.503558	low	less.50	NA	Basal
TCGA.E2.A3DX	TCGA.E2.A3DX	TCGA.E2.A3DX.01	1325	0	43	FEMALE	M0	N3	III	T2	NA	NA	NA	NA	36	25	5.80803	high	less.50	NA	LumA
TCGA.E9.A1N3	TCGA.E9.A1N3	TCGA.E9.A1N3.01	1059	0	70	FEMALE	M0	N2	III	T1	NA	NA	Negative	NA	7	7	1.16141	low	lager.50	NA	LumA
TCGA.E9.A1N4	TCGA.E9.A1N4	TCGA.E9.A1N4.01	1000	0	41	FEMALE	M0	N2	III	T2	Positive	Positive	Negative	NA	7	4	6.64116	high	less.50	NA	LumA
TCGA.E9.A1N5	TCGA.E9.A1N5	TCGA.E9.A1N5.01	1120	0	45	FEMALE	M0	N1	II	T2	Positive	Positive	Negative	NA	11	2	7.63638	high	less.50	NA	LumA
TCGA.E9.A1N6	TCGA.E9.A1N6	TCGA.E9.A1N6.01	678	1	52	FEMALE	M0	N1	II	T2	Positive	Positive	Positive	YES	10	2	27.6619	high	lager.50	NA	LumB
TCGA.E9.A1N8	TCGA.E9.A1N8	TCGA.E9.A1N8.01	1039	0	48	FEMALE	M0	N0	II	T2	Negative	NA	Negative	NA	8	0	1.48235	low	less.50	NA	Basal
TCGA.E9.A1N9	TCGA.E9.A1N9	TCGA.E9.A1N9.01	1101	0	58	FEMALE	M0	N0	II	T2	Negative	Positive	Negative	NA	8	0	3.65644	low	lager.50	NA	Basal
TCGA.E9.A1NA	TCGA.E9.A1NA	TCGA.E9.A1NA.01	1112	0	58	FEMALE	M0	N0	II	T2	Positive	Positive	Negative	NA	11	0	7.76393	high	lager.50	NA	LumB
TCGA.E9.A1ND	TCGA.E9.A1ND	TCGA.E9.A1ND.01	1266	0	75	FEMALE	M0	N1	II	T2	Negative	Negative	Negative	NA	11	1	2.31597	low	lager.50	NA	Basal
TCGA.E9.A1NE	TCGA.E9.A1NE	TCGA.E9.A1NE.01	1088	0	28	FEMALE	M0	N1	II	T2	Positive	Positive	Negative	NA	2	1	5.32369	high	less.50	NA	LumA
TCGA.E9.A1NF	TCGA.E9.A1NF	TCGA.E9.A1NF.01	1072	1	60	FEMALE	M0	N0	II	T2	Positive	Positive	Negative	YES	9	0	20.0844	high	lager.50	NA	LumB
TCGA.E9.A1NG	TCGA.E9.A1NG	TCGA.E9.A1NG.01	786	1	62	FEMALE	M0	N0	II	T2	Positive	Positive	Negative	NA	5	0	61.9764	high	lager.50	NA	LumA
TCGA.E9.A1NH	TCGA.E9.A1NH	TCGA.E9.A1NH.01	576	0	71	FEMALE	M0	N1	II	T2	Positive	Positive	Negative	NA	5	3	20.8767	high	lager.50	NA	LumA
TCGA.E9.A1NI	TCGA.E9.A1NI	TCGA.E9.A1NI.01	300	0	51	FEMALE	M0	N0	II	T2	Positive	Positive	Negative	NA	4	0	20.7316	high	lager.50	NA	LumB
TCGA.E9.A1QZ	TCGA.E9.A1QZ	TCGA.E9.A1QZ.01	755	0	61	FEMALE	M0	N0	II	T2	NA	NA	Negative	NA	19	0	2.5933	low	lager.50	NA	LumA
TCGA.E9.A1R0	TCGA.E9.A1R0	TCGA.E9.A1R0.01	860	0	58	FEMALE	M0	N1	II	T1	NA	NA	Negative	NA	12	1	2.70884	low	lager.50	NA	LumA
TCGA.E9.A1R2	TCGA.E9.A1R2	TCGA.E9.A1R2.01	1063	0	51	FEMALE	NA	N3	III	T2	Positive	Negative	Negative	NA	19	17	4.26811	low	lager.50	NA	LumA
TCGA.E9.A1R3	TCGA.E9.A1R3	TCGA.E9.A1R3.01	78	0	70	FEMALE	M0	N3	III	T2	NA	NA	Negative	NA	10	10	26.8196	high	lager.50	NA	LumA
TCGA.E9.A1R4	TCGA.E9.A1R4	TCGA.E9.A1R4.01	186	0	66	FEMALE	M0	N0	I	T1	NA	NA	Negative	NA	10	0	4.71838	high	lager.50	NA	LumB
TCGA.E9.A1R5	TCGA.E9.A1R5	TCGA.E9.A1R5.01	92	0	63	FEMALE	M0	N0	I	T1	NA	NA	Negative	NA	10	0	15.8972	high	lager.50	NA	LumA
TCGA.E9.A1R6	TCGA.E9.A1R6	TCGA.E9.A1R6.01	339	0	63	FEMALE	M0	N0	II	T2	NA	NA	Negative	NA	10	0	5.98038	high	lager.50	NA	LumA
TCGA.E9.A1R7	TCGA.E9.A1R7	TCGA.E9.A1R7.01	1467	0	64	FEMALE	M0	N0	II	T2	NA	NA	Negative	NA	10	0	3.28089	low	lager.50	NA	LumB
TCGA.E9.A1RB	TCGA.E9.A1RB	TCGA.E9.A1RB.01	976	1	40	FEMALE	M0	N0	II	T2	NA	NA	Negative	NA	10	0	4.749	high	less.50	NA	LumB
TCGA.E9.A1RC	TCGA.E9.A1RC	TCGA.E9.A1RC.01	1224	0	56	FEMALE	M0	N3	III	T4	NA	NA	Negative	NA	10	10	22.5725	high	lager.50	NA	LumA
TCGA.E9.A1RD	TCGA.E9.A1RD	TCGA.E9.A1RD.01	34	0	67	FEMALE	M0	N0	II	T2	NA	NA	Negative	NA	10	0	4.57052	low	lager.50	NA	LumA
TCGA.E9.A1RE	TCGA.E9.A1RE	TCGA.E9.A1RE.01	1419	0	74	FEMALE	M0	N2	III	T2	NA	NA	Negative	NA	10	9	5.84621	high	lager.50	NA	LumB
TCGA.E9.A1RF	TCGA.E9.A1RF	TCGA.E9.A1RF.01	200	0	68	FEMALE	M0	N2	III	T2	NA	NA	Negative	NA	10	5	11.6235	high	lager.50	NA	LumA
TCGA.E9.A1RH	TCGA.E9.A1RH	TCGA.E9.A1RH.01	1417	0	63	FEMALE	M0	N0	II	T2	NA	NA	Negative	NA	10	0	3.56808	low	lager.50	NA	Her2
TCGA.E9.A1RI	TCGA.E9.A1RI	TCGA.E9.A1RI.01	1449	0	43	FEMALE	M0	N2	III	T1	NA	NA	NA	NA	10	5	11.3805	high	less.50	NA	LumA
TCGA.E9.A226	TCGA.E9.A226	TCGA.E9.A226.01	1048	1	45	FEMALE	M0	N2	III	T2	NA	NA	Negative	YES	10	6	26.2791	high	less.50	NA	LumB
TCGA.E9.A227	TCGA.E9.A227	TCGA.E9.A227.01	975	0	42	FEMALE	M0	N1	II	T2	Positive	Positive	Negative	NA	17	1	5.47848	high	less.50	NA	LumA
TCGA.E9.A228	TCGA.E9.A228	TCGA.E9.A228.01	1285	0	58	FEMALE	M0	N1	II	T2	NA	NA	Positive	NA	12	2	1.73738	low	lager.50	NA	LumB
TCGA.E9.A229	TCGA.E9.A229	TCGA.E9.A229.01	1148	0	37	FEMALE	M0	N0	I	T1	NA	NA	Negative	NA	14	0	10.3313	high	less.50	NA	LumA
TCGA.E9.A22A	TCGA.E9.A22A	TCGA.E9.A22A.01	1189	0	74	FEMALE	M0	N0	II	T2	Positive	Negative	Negative	NA	2	0	15.1335	high	lager.50	NA	LumB
TCGA.E9.A22B	TCGA.E9.A22B	TCGA.E9.A22B.01	1167	0	71	FEMALE	M0	N0	I	T1	Positive	Negative	Negative	NA	4	0	13.4445	high	lager.50	NA	LumA
TCGA.E9.A22D	TCGA.E9.A22D	TCGA.E9.A22D.01	1248	0	38	FEMALE	M0	N0	II	T2	Positive	Positive	Positive	NA	10	0	3.44913	low	less.50	NA	LumB
TCGA.E9.A22E	TCGA.E9.A22E	TCGA.E9.A22E.01	1269	0	56	FEMALE	M0	N2	III	T2	Positive	Positive	Negative	NA	10	4	21.6392	high	lager.50	NA	LumB
TCGA.E9.A22G	TCGA.E9.A22G	TCGA.E9.A22G.01	1239	0	47	FEMALE	M0	N0	II	T2	Negative	Negative	Negative	NA	6	0	0.762329	low	less.50	NA	Basal
TCGA.E9.A22H	TCGA.E9.A22H	TCGA.E9.A22H.01	1232	0	42	FEMALE	M0	N1	II	T2	Positive	Positive	Negative	NA	8	1	1.20578	low	less.50	NA	LumB
TCGA.E9.A243	TCGA.E9.A243	TCGA.E9.A243.01	612	0	52	FEMALE	M0	N0	II	T2	NA	NA	Negative	YES	10	0	5.42621	high	lager.50	NA	Basal
TCGA.E9.A244	TCGA.E9.A244	TCGA.E9.A244.01	21	0	54	FEMALE	M0	N0	II	T2	NA	NA	Negative	NA	10	0	11.3092	high	lager.50	NA	Basal
TCGA.E9.A247	TCGA.E9.A247	TCGA.E9.A247.01	1186	0	59	FEMALE	M0	N0	I	T1	NA	NA	Negative	NA	10	0	2.60869	low	lager.50	NA	LumA
TCGA.E9.A248	TCGA.E9.A248	TCGA.E9.A248.01	59	0	51	FEMALE	M0	N0	II	T2	NA	NA	Negative	NA	10	0	1.48572	low	lager.50	NA	Her2
TCGA.E9.A249	TCGA.E9.A249	TCGA.E9.A249.01	217	0	45	FEMALE	M0	N0	II	T2	NA	NA	Negative	NA	10	0	1.86376	low	less.50	NA	LumB
TCGA.E9.A24A	TCGA.E9.A24A	TCGA.E9.A24A.01	747	0	69	FEMALE	M0	N1	II	T1	NA	NA	Negative	NA	10	1	14.0966	high	lager.50	NA	LumA
TCGA.E9.A295	TCGA.E9.A295	TCGA.E9.A295.01	375	0	71	FEMALE	M0	N0	II	T2	NA	NA	NA	NA	7	0	5.4052	high	lager.50	NA	LumA
TCGA.E9.A2JS	TCGA.E9.A2JS	TCGA.E9.A2JS.01	904	1	72	FEMALE	M0	N1	II	T2	NA	NA	NA	YES	10	1	6.07482	high	lager.50	NA	LumB
TCGA.E9.A2JT	TCGA.E9.A2JT	TCGA.E9.A2JT.01	288	0	63	FEMALE	M0	N0	II	T2	NA	NA	NA	NA	10	0	0.234284	low	lager.50	NA	LumA
TCGA.EW.A1IW	TCGA.EW.A1IW	TCGA.EW.A1IW.01	371	0	80	FEMALE	NA	N1	II	T2	Positive	Positive	Positive	NA	10	2	2.85765	low	lager.50	NA	LumA
TCGA.EW.A1IX	TCGA.EW.A1IX	TCGA.EW.A1IX.01	1208	0	48	FEMALE	NA	N1	II	T1	Positive	Positive	Negative	NA	27	1	9.03007	high	less.50	NA	LumA
TCGA.EW.A1IY	TCGA.EW.A1IY	TCGA.EW.A1IY.01	258	0	38	FEMALE	NA	N0	I	T1	Positive	Positive	Negative	NA	6	0	14.1933	high	less.50	NA	LumB
TCGA.EW.A1J1	TCGA.EW.A1J1	TCGA.EW.A1J1.01	575	0	38	FEMALE	M0	N1	II	T2	Positive	Positive	Negative	NA	17	1	3.17579	low	less.50	NA	LumA
TCGA.EW.A1J2	TCGA.EW.A1J2	TCGA.EW.A1J2.01	403	0	50	FEMALE	NA	N1	NA	T1	Positive	Positive	Negative	NA	21	1	10.1121	high	lager.50	NA	LumA
TCGA.EW.A1J3	TCGA.EW.A1J3	TCGA.EW.A1J3.01	504	0	61	FEMALE	M0	N0	I	T1	Positive	Positive	Positive	NA	3	0	5.32205	high	lager.50	NA	LumA
TCGA.EW.A1J5	TCGA.EW.A1J5	TCGA.EW.A1J5.01	477	0	59	FEMALE	M0	N0	II	T3	Positive	Positive	Negative	NA	1	0	4.1633	low	lager.50	NA	LumA
TCGA.EW.A1J6	TCGA.EW.A1J6	TCGA.EW.A1J6.01	875	0	70	FEMALE	M0	N0	I	T1	Positive	Positive	Negative	NA	3	0	0.387087	low	lager.50	NA	LumB
TCGA.EW.A1OV	TCGA.EW.A1OV	TCGA.EW.A1OV.01	789	0	56	FEMALE	NA	N1	II	T2	Negative	Negative	Negative	NA	6	0	1.25385	low	lager.50	NA	Her2
TCGA.EW.A1OW	TCGA.EW.A1OW	TCGA.EW.A1OW.01	694	0	58	FEMALE	NA	N0	II	T2	Negative	Negative	Negative	NA	3	0	9.1238	high	lager.50	NA	Basal
TCGA.EW.A1OX	TCGA.EW.A1OX	TCGA.EW.A1OX.01	911	0	43	FEMALE	NA	N0	II	T2	Positive	Positive	Negative	NA	4	0	0.227426	low	less.50	NA	LumB
TCGA.EW.A1OY	TCGA.EW.A1OY	TCGA.EW.A1OY.01	908	0	63	FEMALE	NA	N0	II	T2	Positive	Positive	Negative	NA	1	0	4.98139	high	lager.50	NA	LumB
TCGA.EW.A1OZ	TCGA.EW.A1OZ	TCGA.EW.A1OZ.01	1229	0	56	FEMALE	M0	N0	II	T2	Positive	Negative	Positive	NA	4	0	16.9901	high	lager.50	NA	LumB
TCGA.EW.A1P0	TCGA.EW.A1P0	TCGA.EW.A1P0.01	1251	0	55	FEMALE	NA	N1	II	T2	Positive	Negative	Negative	YES	21	1	6.26517	high	lager.50	NA	LumB
TCGA.EW.A1P3	TCGA.EW.A1P3	TCGA.EW.A1P3.01	1611	0	48	FEMALE	NA	N0	II	T2	Positive	Positive	Negative	NA	4	0	2.64164	low	less.50	NA	LumA
TCGA.EW.A1P4	TCGA.EW.A1P4	TCGA.EW.A1P4.01	907	0	43	FEMALE	M0	N0	II	T2	Negative	Negative	Negative	NA	3	0	4.46772	low	less.50	NA	Basal
TCGA.EW.A1P5	TCGA.EW.A1P5	TCGA.EW.A1P5.01	703	0	77	FEMALE	M0	N1	II	T2	Positive	Positive	Negative	NA	40	3	6.33295	high	lager.50	NA	LumA
TCGA.EW.A1P6	TCGA.EW.A1P6	TCGA.EW.A1P6.01	562	0	64	FEMALE	M0	N1	II	T2	Positive	Positive	Negative	NA	25	2	6.8628	high	lager.50	NA	LumA
TCGA.EW.A1P7	TCGA.EW.A1P7	TCGA.EW.A1P7.01	915	0	59	FEMALE	M0	N0	II	T2	Negative	Negative	Negative	YES	2	0	4.20451	low	lager.50	NA	Normal
TCGA.EW.A1P8	TCGA.EW.A1P8	TCGA.EW.A1P8.01	239	1	58	FEMALE	M0	N3	III	T2	Negative	Negative	Negative	NA	15	14	5.12928	high	lager.50	NA	Basal
TCGA.EW.A1PA	TCGA.EW.A1PA	TCGA.EW.A1PA.01	575	0	59	FEMALE	M0	N1	II	T2	Positive	Positive	Negative	NA	13	1	2.40617	low	lager.50	NA	LumA
TCGA.EW.A1PB	TCGA.EW.A1PB	TCGA.EW.A1PB.01	608	0	70	FEMALE	NA	N1	III	T3	Negative	Negative	Negative	NA	8	2	1.00765	low	lager.50	NA	Basal
TCGA.EW.A1PC	TCGA.EW.A1PC	TCGA.EW.A1PC.01	187	0	66	FEMALE	NA	N0	II	T3	NA	NA	NA	NA	2	0	7.0362	high	lager.50	NA	LumB
TCGA.EW.A1PD	TCGA.EW.A1PD	TCGA.EW.A1PD.01	424	0	61	MALE	M0	N1	II	T1	Positive	Positive	Positive	NA	7	2	9.20765	high	lager.50	NA	LumA
TCGA.EW.A1PE	TCGA.EW.A1PE	TCGA.EW.A1PE.01	320	0	56	FEMALE	M0	N1	II	T1	Positive	Positive	Negative	NA	23	1	16.1099	high	lager.50	NA	LumA
TCGA.EW.A1PF	TCGA.EW.A1PF	TCGA.EW.A1PF.01	439	0	50	FEMALE	M0	N0	I	T1	Positive	Positive	Negative	NA	11	0	16.7046	high	lager.50	NA	LumA
TCGA.EW.A1PG	TCGA.EW.A1PG	TCGA.EW.A1PG.01	1051	0	53	FEMALE	NA	N1	II	T2	Positive	Positive	Negative	NA	25	1	8.0789	high	lager.50	NA	Normal
TCGA.EW.A1PH	TCGA.EW.A1PH	TCGA.EW.A1PH.01	607	0	52	FEMALE	M0	N1	II	T1	Negative	Negative	NA	NA	10	1	2.47583	low	lager.50	NA	Basal
TCGA.EW.A2FR	TCGA.EW.A2FR	TCGA.EW.A2FR.01	1673	0	59	FEMALE	NA	N3	III	T1	NA	NA	NA	NA	21	19	47.6247	high	lager.50	NA	Her2
TCGA.EW.A2FS	TCGA.EW.A2FS	TCGA.EW.A2FS.01	1604	0	41	FEMALE	NA	N1	II	T2	Positive	Negative	NA	NA	8	1	0.617861	low	less.50	NA	LumA
TCGA.EW.A2FV	TCGA.EW.A2FV	TCGA.EW.A2FV.01	788	0	39	FEMALE	NA	N3	III	T3	Positive	Positive	NA	NA	32	29	3.77363	low	less.50	NA	LumA
TCGA.EW.A2FW	TCGA.EW.A2FW	TCGA.EW.A2FW.01	672	0	52	FEMALE	NA	N0	II	T2	Positive	Positive	NA	NA	6	0	3.19897	low	lager.50	NA	LumB
TCGA.GI.A2C8	TCGA.GI.A2C8	TCGA.GI.A2C8.01	225	0	63	FEMALE	NA	N0	III	T4	NA	NA	NA	NA	10	0	6.57737	high	lager.50	NA	LumA
TCGA.GI.A2C9	TCGA.GI.A2C9	TCGA.GI.A2C9.01	3342	0	58	FEMALE	NA	N0	II	T3	NA	NA	NA	NA	4	0	5.00886	high	lager.50	NA	Basal
TCGA.GM.A2D9	TCGA.GM.A2D9	TCGA.GM.A2D9.01	1812	1	69	FEMALE	M0	N0	I	T1	Positive	Positive	NA	YES	2	0	5.74117	high	lager.50	NA	LumA
TCGA.GM.A2DA	TCGA.GM.A2DA	TCGA.GM.A2DA.01	6593	1	46	FEMALE	M0	N1	II	T2	Positive	Positive	NA	YES	13	2	1.93497	low	less.50	NA	LumA
TCGA.GM.A2DB	TCGA.GM.A2DB	TCGA.GM.A2DB.01	2406	0	62	FEMALE	M0	N0	II	T2	Negative	Negative	NA	NA	3	0	1.6108	low	lager.50	NA	Her2
TCGA.GM.A2DC	TCGA.GM.A2DC	TCGA.GM.A2DC.01	2535	0	57	FEMALE	M0	N1	II	T1	Positive	Positive	NA	NA	21	1	1.41808	low	lager.50	NA	LumA
TCGA.GM.A2DD	TCGA.GM.A2DD	TCGA.GM.A2DD.01	2282	0	53	FEMALE	M0	N0	I	T1	Negative	Negative	NA	NA	2	0	2.51129	low	lager.50	NA	Normal
TCGA.GM.A2DF	TCGA.GM.A2DF	TCGA.GM.A2DF.01	2155	0	53	FEMALE	M0	N1	II	T1	Negative	Negative	NA	NA	32	1	1.35406	low	lager.50	NA	Basal
TCGA.GM.A2DH	TCGA.GM.A2DH	TCGA.GM.A2DH.01	2193	0	58	FEMALE	M0	N0	I	T1	Negative	Negative	NA	NA	2	0	1.59466	low	lager.50	NA	Her2
TCGA.GM.A2DI	TCGA.GM.A2DI	TCGA.GM.A2DI.01	2590	0	52	FEMALE	M0	N0	I	T1	Negative	Negative	NA	NA	9	0	7.67778	high	lager.50	NA	LumA
TCGA.GM.A2DK	TCGA.GM.A2DK	TCGA.GM.A2DK.01	2645	0	58	FEMALE	M0	N0	I	T1	Positive	Negative	NA	NA	1	0	3.6264	low	lager.50	NA	LumA
TCGA.GM.A2DL	TCGA.GM.A2DL	TCGA.GM.A2DL.01	3519	0	50	FEMALE	M0	N0	I	T1	Positive	Positive	NA	NA	2	0	17.5546	high	lager.50	NA	LumA
TCGA.GM.A2DM	TCGA.GM.A2DM	TCGA.GM.A2DM.01	3226	0	57	FEMALE	M0	N0	II	T2	Positive	Positive	NA	NA	2	0	2.83723	low	lager.50	NA	LumA
TCGA.GM.A2DN	TCGA.GM.A2DN	TCGA.GM.A2DN.01	3091	0	58	FEMALE	M0	N0	II	T2	Positive	Positive	NA	NA	9	0	4.79285	high	lager.50	NA	LumA
TCGA.GM.A2DO	TCGA.GM.A2DO	TCGA.GM.A2DO.01	2596	0	54	FEMALE	M0	N0	I	T1	Positive	Positive	NA	NA	3	0	1.16041	low	lager.50	NA	LumB
TCGA.GM.A3NY	TCGA.GM.A3NY	TCGA.GM.A3NY.01	1162	0	72	FEMALE	M0	N1	II	T2	NA	NA	NA	NA	13	1	1.40887	low	lager.50	NA	LumA
TCGA.HN.A2NL	TCGA.HN.A2NL	TCGA.HN.A2NL.01	79	0	56	FEMALE	M0	N0	II	T2	NA	NA	NA	NA	3	0	0.179246	low	lager.50	NA	Basal

## Sheet: clinical summary
		Number of patients	High (LINC01614)	Low (LINC01614)	P value
	Age(years)
	< 50	225	121	104	0.211
	>=50	599	291	308
	Sex
	Male	9	8	1	0.044
	Female	815	404	411
	TNM stage
	I	140	79	61	0.076
	II	471	221	250
	III	178	92	86
	IV	14	10	4
	ER.status
	Positive	573	322	251	<0.0001
	Negative	174	51	123
	PR.status
	Positive	500	283	217	<0.0001
	Negative	244	91	153
	HER2.status
	Positive	110	73	37	0.0006
	Negative	620	298	322
	treament
	Yes	41	22	19	0.098
	No	24	7	17
	PAM50 subtype
	Normal-like	22	6	16	<0.0001
	Basal-like	138	38	100
	HER2-enriched	64	30	34
	Luminal A	413	233	180
	luminal B	187	105	82
