# Supplementary material for: Long non-coding RNA, LINC01614 as a potential biomarker for prognostic prediction in breast cancer
Source: PeerJ. 2019 Nov 14;7:e7976. doi: 10.7717/peerj.7976 (PMC6858983; doi:10.7717/peerj.7976)
Supplement: Supplemental Information 6 [file peerj-07-7976-s006.xls]

## Sheet: gsea_report_for_high.risk_15460
NAME	GS<br> follow link to MSigDB	GS DETAILS	SIZE	ES	NES	NOM p-val	FDR q-val	FWER p-val	RANK AT MAX	LEADING EDGE
PID_FAK_PATHWAY	PID_FAK_PATHWAY	Details ...	58	0.541172	2.3434	0	0.0830036	0.017	6886	tags=59%, list=34%, signal=88%
PECE_MAMMARY_STEM_CELL_DN	PECE_MAMMARY_STEM_CELL_DN	Details ...	134	0.599918	2.32416	0	0.0536244	0.022	4710	tags=43%, list=23%, signal=56%
DACOSTA_UV_RESPONSE_VIA_ERCC3_COMMON_DN	DACOSTA_UV_RESPONSE_VIA_ERCC3_COMMON_DN	Details ...	463	0.511912	2.29156	0	0.0514994	0.037	5669	tags=49%, list=28%, signal=66%
RICKMAN_TUMOR_DIFFERENTIATED_MODERATELY_VS_POORLY_UP	RICKMAN_TUMOR_DIFFERENTIATED_MODERATELY_VS_POORLY_UP	Details ...	118	0.550096	2.26329	0	0.0457703	0.044	3298	tags=35%, list=16%, signal=41%
BERENJENO_ROCK_SIGNALING_NOT_VIA_RHOA_DN	BERENJENO_ROCK_SIGNALING_NOT_VIA_RHOA_DN	Details ...	48	0.630692	2.24692	0	0.0419265	0.049	4262	tags=56%, list=21%, signal=71%
LAIHO_COLORECTAL_CANCER_SERRATED_UP	LAIHO_COLORECTAL_CANCER_SERRATED_UP	Details ...	110	0.51166	2.22384	0	0.0418314	0.059	4784	tags=43%, list=23%, signal=55%
REN_ALVEOLAR_RHABDOMYOSARCOMA_DN	REN_ALVEOLAR_RHABDOMYOSARCOMA_DN	Details ...	407	0.589505	2.2132	0	0.0391855	0.066	5276	tags=51%, list=26%, signal=67%
PID_NECTIN_PATHWAY	PID_NECTIN_PATHWAY	Details ...	30	0.64942	2.19693	0	0.0441334	0.086	4808	tags=47%, list=23%, signal=61%
BURTON_ADIPOGENESIS_11	BURTON_ADIPOGENESIS_11	Details ...	57	0.601409	2.17906	0	0.0467778	0.102	5590	tags=56%, list=27%, signal=77%
TURASHVILI_BREAST_DUCTAL_CARCINOMA_VS_LOBULAR_NORMAL_UP	TURASHVILI_BREAST_DUCTAL_CARCINOMA_VS_LOBULAR_NORMAL_UP	Details ...	71	0.68772	2.16417	0	0.0493928	0.119	1046	tags=27%, list=5%, signal=28%
MILI_PSEUDOPODIA_CHEMOTAXIS_DN	MILI_PSEUDOPODIA_CHEMOTAXIS_DN	Details ...	453	0.37123	2.15118	0	0.0502852	0.132	5703	tags=35%, list=28%, signal=48%
DOUGLAS_BMI1_TARGETS_DN	DOUGLAS_BMI1_TARGETS_DN	Details ...	307	0.44684	2.14706	0	0.0480934	0.136	5824	tags=45%, list=28%, signal=61%
VERRECCHIA_EARLY_RESPONSE_TO_TGFB1	VERRECCHIA_EARLY_RESPONSE_TO_TGFB1	Details ...	58	0.676204	2.12165	0	0.0551037	0.166	2833	tags=43%, list=14%, signal=50%
DACOSTA_UV_RESPONSE_VIA_ERCC3_XPCS_DN	DACOSTA_UV_RESPONSE_VIA_ERCC3_XPCS_DN	Details ...	87	0.572443	2.11138	0	0.0578206	0.183	5289	tags=52%, list=26%, signal=69%
TURASHVILI_BREAST_DUCTAL_CARCINOMA_VS_DUCTAL_NORMAL_UP	TURASHVILI_BREAST_DUCTAL_CARCINOMA_VS_DUCTAL_NORMAL_UP	Details ...	44	0.780471	2.11084	0	0.0541568	0.184	1542	tags=48%, list=8%, signal=51%
SENESE_HDAC3_TARGETS_UP	SENESE_HDAC3_TARGETS_UP	Details ...	485	0.545782	2.10533	0	0.0549361	0.193	4517	tags=45%, list=22%, signal=56%
DUTERTRE_ESTRADIOL_RESPONSE_6HR_DN	DUTERTRE_ESTRADIOL_RESPONSE_6HR_DN	Details ...	90	0.699659	2.10395	0	0.052911	0.197	4309	tags=63%, list=21%, signal=80%
PID_INTEGRIN3_PATHWAY	PID_INTEGRIN3_PATHWAY	Details ...	43	0.779428	2.093	0	0.0579952	0.221	2800	tags=67%, list=14%, signal=78%
SESTO_RESPONSE_TO_UV_C5	SESTO_RESPONSE_TO_UV_C5	Details ...	46	0.499513	2.08504	0.00201207	0.0590649	0.233	6407	tags=52%, list=31%, signal=76%
DE_YY1_TARGETS_DN	DE_YY1_TARGETS_DN	Details ...	91	0.574146	2.08303	0	0.0574906	0.236	5644	tags=58%, list=28%, signal=80%
IKEDA_MIR133_TARGETS_UP	IKEDA_MIR133_TARGETS_UP	Details ...	43	0.558744	2.06796	0.00193424	0.0641334	0.273	5953	tags=51%, list=29%, signal=72%
JI_RESPONSE_TO_FSH_DN	JI_RESPONSE_TO_FSH_DN	Details ...	58	0.496574	2.06639	0.00402414	0.0626428	0.278	3357	tags=28%, list=16%, signal=33%
GENTILE_UV_RESPONSE_CLUSTER_D5	GENTILE_UV_RESPONSE_CLUSTER_D5	Details ...	38	0.53692	2.06516	0.00204082	0.0609278	0.28	4714	tags=37%, list=23%, signal=48%
GU_PDEF_TARGETS_UP	GU_PDEF_TARGETS_UP	Details ...	71	0.698641	2.06424	0	0.0590033	0.282	3125	tags=54%, list=15%, signal=63%
GUO_HEX_TARGETS_UP	GUO_HEX_TARGETS_UP	Details ...	79	0.544821	2.06026	0	0.0586393	0.29	4397	tags=38%, list=21%, signal=48%
LIU_SOX4_TARGETS_UP	LIU_SOX4_TARGETS_UP	Details ...	134	0.436824	2.05387	0	0.0605335	0.303	4575	tags=35%, list=22%, signal=45%
DACOSTA_UV_RESPONSE_VIA_ERCC3_TTD_DN	DACOSTA_UV_RESPONSE_VIA_ERCC3_TTD_DN	Details ...	83	0.624156	2.03251	0	0.0730239	0.352	3907	tags=48%, list=19%, signal=59%
IKEDA_MIR30_TARGETS_UP	IKEDA_MIR30_TARGETS_UP	Details ...	115	0.528255	2.03149	0	0.0709988	0.354	5173	tags=53%, list=25%, signal=71%
PID_ECADHERIN_NASCENT_AJ_PATHWAY	PID_ECADHERIN_NASCENT_AJ_PATHWAY	Details ...	39	0.433885	2.02695	0.0019685	0.0710462	0.366	8078	tags=59%, list=39%, signal=97%
VERRECCHIA_RESPONSE_TO_TGFB1_C2	VERRECCHIA_RESPONSE_TO_TGFB1_C2	Details ...	25	0.772639	2.01639	0	0.0745755	0.389	1147	tags=44%, list=6%, signal=47%
PID_AVB3_OPN_PATHWAY	PID_AVB3_OPN_PATHWAY	Details ...	31	0.626023	2.0121	0.00200803	0.0750792	0.398	4664	tags=42%, list=23%, signal=54%
SASSON_RESPONSE_TO_GONADOTROPHINS_DN	SASSON_RESPONSE_TO_GONADOTROPHINS_DN	Details ...	87	0.529852	2.00762	0	0.0754571	0.404	5940	tags=57%, list=29%, signal=81%
TURASHVILI_BREAST_LOBULAR_CARCINOMA_VS_LOBULAR_NORMAL_DN	TURASHVILI_BREAST_LOBULAR_CARCINOMA_VS_LOBULAR_NORMAL_DN	Details ...	74	0.775086	2.00533	0	0.0750085	0.411	2043	tags=55%, list=10%, signal=61%
SWEET_KRAS_TARGETS_UP	SWEET_KRAS_TARGETS_UP	Details ...	83	0.680911	2.00168	0	0.0747951	0.422	3092	tags=48%, list=15%, signal=57%
WANG_CLIM2_TARGETS_DN	WANG_CLIM2_TARGETS_DN	Details ...	178	0.347508	1.99755	0	0.0752924	0.431	6243	tags=40%, list=30%, signal=57%
REACTOME_INTEGRIN_CELL_SURFACE_INTERACTIONS	REACTOME_INTEGRIN_CELL_SURFACE_INTERACTIONS	Details ...	79	0.668252	1.99661	0	0.073852	0.436	2921	tags=47%, list=14%, signal=54%
ZHU_CMV_24_HR_DN	ZHU_CMV_24_HR_DN	Details ...	90	0.669808	1.99627	0	0.0723769	0.437	3233	tags=54%, list=16%, signal=64%
WAMUNYOKOLI_OVARIAN_CANCER_LMP_DN	WAMUNYOKOLI_OVARIAN_CANCER_LMP_DN	Details ...	190	0.609402	1.99553	0	0.0710865	0.439	5104	tags=53%, list=25%, signal=69%
GINESTIER_BREAST_CANCER_ZNF217_AMPLIFIED_UP	GINESTIER_BREAST_CANCER_ZNF217_AMPLIFIED_UP	Details ...	73	0.576364	1.99281	0	0.0713275	0.451	5795	tags=59%, list=28%, signal=82%
ONDER_CDH1_TARGETS_2_UP	ONDER_CDH1_TARGETS_2_UP	Details ...	254	0.688778	1.99227	0	0.0701289	0.453	3325	tags=55%, list=16%, signal=65%
PASINI_SUZ12_TARGETS_DN	PASINI_SUZ12_TARGETS_DN	Details ...	313	0.56942	1.99023	0	0.0697578	0.457	3288	tags=40%, list=16%, signal=46%
BALDWIN_PRKCI_TARGETS_UP	BALDWIN_PRKCI_TARGETS_UP	Details ...	34	0.554334	1.9896	0	0.0688807	0.46	5804	tags=59%, list=28%, signal=82%
GENTILE_UV_LOW_DOSE_DN	GENTILE_UV_LOW_DOSE_DN	Details ...	66	0.617076	1.98231	0	0.0725016	0.482	2514	tags=39%, list=12%, signal=45%
OSMAN_BLADDER_CANCER_UP	OSMAN_BLADDER_CANCER_UP	Details ...	394	0.414344	1.98148	0.00996016	0.0715398	0.485	6826	tags=49%, list=33%, signal=72%
JOHNSTONE_PARVB_TARGETS_3_UP	JOHNSTONE_PARVB_TARGETS_3_UP	Details ...	412	0.421976	1.9814	0	0.0700167	0.485	6084	tags=45%, list=30%, signal=63%
SASSON_RESPONSE_TO_FORSKOLIN_DN	SASSON_RESPONSE_TO_FORSKOLIN_DN	Details ...	87	0.52741	1.97919	0	0.0695354	0.488	4296	tags=40%, list=21%, signal=51%
TURASHVILI_BREAST_LOBULAR_CARCINOMA_VS_DUCTAL_NORMAL_UP	TURASHVILI_BREAST_LOBULAR_CARCINOMA_VS_DUCTAL_NORMAL_UP	Details ...	67	0.82943	1.97919	0	0.0680559	0.488	2043	tags=66%, list=10%, signal=73%
BAELDE_DIABETIC_NEPHROPATHY_DN	BAELDE_DIABETIC_NEPHROPATHY_DN	Details ...	429	0.464018	1.97866	0.00194175	0.0673273	0.493	5371	tags=44%, list=26%, signal=58%
KAMIKUBO_MYELOID_MN1_NETWORK	KAMIKUBO_MYELOID_MN1_NETWORK	Details ...	19	0.618727	1.97849	0.00195312	0.0659882	0.493	5986	tags=58%, list=29%, signal=82%
CREIGHTON_ENDOCRINE_THERAPY_RESISTANCE_5	CREIGHTON_ENDOCRINE_THERAPY_RESISTANCE_5	Details ...	466	0.515709	1.97774	0	0.0653816	0.501	6078	tags=53%, list=30%, signal=74%
BILD_CTNNB1_ONCOGENIC_SIGNATURE	BILD_CTNNB1_ONCOGENIC_SIGNATURE	Details ...	73	0.517184	1.97695	0.00201613	0.0645014	0.502	4575	tags=44%, list=22%, signal=56%
BIOCARTA_TGFB_PATHWAY	BIOCARTA_TGFB_PATHWAY	Details ...	19	0.632602	1.97306	0	0.0653262	0.508	2833	tags=37%, list=14%, signal=43%
ZHU_CMV_ALL_DN	ZHU_CMV_ALL_DN	Details ...	127	0.630837	1.97127	0	0.0648498	0.512	3233	tags=46%, list=16%, signal=55%
PID_WNT_NONCANONICAL_PATHWAY	PID_WNT_NONCANONICAL_PATHWAY	Details ...	32	0.584147	1.97126	0	0.0636489	0.512	2690	tags=31%, list=13%, signal=36%
GARGALOVIC_RESPONSE_TO_OXIDIZED_PHOSPHOLIPIDS_YELLOW_UP	GARGALOVIC_RESPONSE_TO_OXIDIZED_PHOSPHOLIPIDS_YELLOW_UP	Details ...	32	0.572671	1.97039	0.00406504	0.0628723	0.513	4921	tags=50%, list=24%, signal=66%
JOHNSTONE_PARVB_TARGETS_1_DN	JOHNSTONE_PARVB_TARGETS_1_DN	Details ...	61	0.615804	1.96651	0	0.0639884	0.527	4620	tags=57%, list=23%, signal=74%
GABRIELY_MIR21_TARGETS	GABRIELY_MIR21_TARGETS	Details ...	283	0.515327	1.96117	0	0.0656827	0.543	6795	tags=65%, list=33%, signal=96%
PID_AVB3_INTEGRIN_PATHWAY	PID_AVB3_INTEGRIN_PATHWAY	Details ...	75	0.656365	1.96039	0	0.0650411	0.545	2440	tags=47%, list=12%, signal=53%
SENESE_HDAC2_TARGETS_UP	SENESE_HDAC2_TARGETS_UP	Details ...	113	0.557023	1.96037	0.00195695	0.0639708	0.545	3384	tags=34%, list=17%, signal=40%
VECCHI_GASTRIC_CANCER_ADVANCED_VS_EARLY_UP	VECCHI_GASTRIC_CANCER_ADVANCED_VS_EARLY_UP	Details ...	170	0.7808	1.96002	0	0.0630378	0.546	2403	tags=64%, list=12%, signal=72%
PID_TCPTP_PATHWAY	PID_TCPTP_PATHWAY	Details ...	43	0.541909	1.95989	0	0.0621133	0.546	5655	tags=51%, list=28%, signal=71%
YAMAZAKI_TCEB3_TARGETS_UP	YAMAZAKI_TCEB3_TARGETS_UP	Details ...	174	0.52481	1.9598	0.00197628	0.0611724	0.546	5129	tags=45%, list=25%, signal=60%
ONDER_CDH1_SIGNALING_VIA_CTNNB1	ONDER_CDH1_SIGNALING_VIA_CTNNB1	Details ...	82	0.67683	1.95974	0	0.0602357	0.547	3359	tags=59%, list=16%, signal=70%
BROWNE_HCMV_INFECTION_24HR_DN	BROWNE_HCMV_INFECTION_24HR_DN	Details ...	146	0.600535	1.95933	0	0.0595081	0.547	4538	tags=56%, list=22%, signal=72%
RIGGINS_TAMOXIFEN_RESISTANCE_DN	RIGGINS_TAMOXIFEN_RESISTANCE_DN	Details ...	219	0.551143	1.95801	0	0.0594081	0.551	4969	tags=52%, list=24%, signal=67%
WANG_SMARCE1_TARGETS_UP	WANG_SMARCE1_TARGETS_UP	Details ...	275	0.658744	1.95749	0	0.05877	0.554	3706	tags=59%, list=18%, signal=71%
RODRIGUES_DCC_TARGETS_DN	RODRIGUES_DCC_TARGETS_DN	Details ...	119	0.504093	1.95736	0	0.0579536	0.554	5368	tags=46%, list=26%, signal=62%
SENESE_HDAC1_TARGETS_UP	SENESE_HDAC1_TARGETS_UP	Details ...	443	0.500425	1.9532	0	0.0595798	0.565	4557	tags=40%, list=22%, signal=50%
BERENJENO_TRANSFORMED_BY_RHOA_DN	BERENJENO_TRANSFORMED_BY_RHOA_DN	Details ...	389	0.459102	1.95154	0	0.0597156	0.57	4362	tags=33%, list=21%, signal=41%
DAZARD_RESPONSE_TO_UV_NHEK_DN	DAZARD_RESPONSE_TO_UV_NHEK_DN	Details ...	306	0.421803	1.94349	0.00588235	0.0636484	0.601	5596	tags=41%, list=27%, signal=55%
PID_UPA_UPAR_PATHWAY	PID_UPA_UPAR_PATHWAY	Details ...	42	0.758513	1.94236	0	0.0631348	0.609	2262	tags=57%, list=11%, signal=64%
MIYAGAWA_TARGETS_OF_EWSR1_ETS_FUSIONS_DN	MIYAGAWA_TARGETS_OF_EWSR1_ETS_FUSIONS_DN	Details ...	217	0.687346	1.93986	0	0.0637947	0.617	2279	tags=47%, list=11%, signal=52%
TIEN_INTESTINE_PROBIOTICS_2HR_DN	TIEN_INTESTINE_PROBIOTICS_2HR_DN	Details ...	86	0.419605	1.93813	0.0038835	0.0637032	0.621	5599	tags=43%, list=27%, signal=59%
REACTOME_SEMAPHORIN_INTERACTIONS	REACTOME_SEMAPHORIN_INTERACTIONS	Details ...	63	0.566981	1.93696	0	0.0634337	0.626	4612	tags=40%, list=22%, signal=51%
REACTOME_SPHINGOLIPID_DE_NOVO_BIOSYNTHESIS	REACTOME_SPHINGOLIPID_DE_NOVO_BIOSYNTHESIS	Details ...	25	0.631173	1.93616	0	0.0630808	0.626	3907	tags=40%, list=19%, signal=49%
VERRECCHIA_DELAYED_RESPONSE_TO_TGFB1	VERRECCHIA_DELAYED_RESPONSE_TO_TGFB1	Details ...	39	0.648465	1.93432	0.00199203	0.0635597	0.631	1518	tags=33%, list=7%, signal=36%
BROWNE_HCMV_INFECTION_12HR_DN	BROWNE_HCMV_INFECTION_12HR_DN	Details ...	98	0.581219	1.93225	0	0.0636476	0.633	3294	tags=39%, list=16%, signal=46%
DANG_REGULATED_BY_MYC_DN	DANG_REGULATED_BY_MYC_DN	Details ...	252	0.484939	1.93224	0	0.0628582	0.633	4693	tags=41%, list=23%, signal=52%
GENTILE_UV_RESPONSE_CLUSTER_D2	GENTILE_UV_RESPONSE_CLUSTER_D2	Details ...	41	0.528142	1.93084	0.00199601	0.0628716	0.639	6147	tags=54%, list=30%, signal=76%
PHONG_TNF_RESPONSE_VIA_P38_COMPLETE	PHONG_TNF_RESPONSE_VIA_P38_COMPLETE	Details ...	221	0.405815	1.92742	0.00192308	0.0638238	0.645	6000	tags=43%, list=29%, signal=60%
RODRIGUES_THYROID_CARCINOMA_DN	RODRIGUES_THYROID_CARCINOMA_DN		75	0.599103	1.92594	0.00196078	0.0640249	0.648	4507	tags=51%, list=22%, signal=65%
WANG_LMO4_TARGETS_DN	WANG_LMO4_TARGETS_DN		342	0.335651	1.92165	0.00618557	0.0658334	0.662	5709	tags=39%, list=28%, signal=53%
IKEDA_MIR1_TARGETS_UP	IKEDA_MIR1_TARGETS_UP		52	0.488118	1.92159	0.00798403	0.0651608	0.662	7010	tags=50%, list=34%, signal=76%
BIOCARTA_GSK3_PATHWAY	BIOCARTA_GSK3_PATHWAY		27	0.589447	1.91868	0.00592885	0.0662795	0.669	4808	tags=48%, list=23%, signal=63%
ROY_WOUND_BLOOD_VESSEL_UP	ROY_WOUND_BLOOD_VESSEL_UP		48	0.703594	1.91831	0	0.065627	0.671	1991	tags=42%, list=10%, signal=46%
PICCALUGA_ANGIOIMMUNOBLASTIC_LYMPHOMA_UP	PICCALUGA_ANGIOIMMUNOBLASTIC_LYMPHOMA_UP		204	0.692368	1.91802	0	0.0649686	0.672	3251	tags=60%, list=16%, signal=71%
ROZANOV_MMP14_TARGETS_SUBSET	ROZANOV_MMP14_TARGETS_SUBSET		33	0.77396	1.91276	0	0.067539	0.687	3067	tags=76%, list=15%, signal=89%
PID_INTEGRIN1_PATHWAY	PID_INTEGRIN1_PATHWAY		66	0.736372	1.9117	0	0.0673157	0.687	3125	tags=70%, list=15%, signal=82%
SCHUETZ_BREAST_CANCER_DUCTAL_INVASIVE_UP	SCHUETZ_BREAST_CANCER_DUCTAL_INVASIVE_UP		336	0.790214	1.91123	0	0.0668753	0.688	3214	tags=76%, list=16%, signal=89%
WATANABE_RECTAL_CANCER_RADIOTHERAPY_RESPONSIVE_DN	WATANABE_RECTAL_CANCER_RADIOTHERAPY_RESPONSIVE_DN		91	0.417198	1.9102	0.00967118	0.0667192	0.688	6147	tags=43%, list=30%, signal=61%
MAHAJAN_RESPONSE_TO_IL1A_DN	MAHAJAN_RESPONSE_TO_IL1A_DN		76	0.501206	1.90942	0.00390625	0.066437	0.69	3939	tags=33%, list=19%, signal=41%
BURTON_ADIPOGENESIS_8	BURTON_ADIPOGENESIS_8		85	0.527638	1.9089	0.00782779	0.0660092	0.692	5953	tags=52%, list=29%, signal=73%
YOSHIMURA_MAPK8_TARGETS_DN	YOSHIMURA_MAPK8_TARGETS_DN		359	0.380244	1.9046	0	0.0673785	0.7	5128	tags=30%, list=25%, signal=39%
PID_TGFBR_PATHWAY	PID_TGFBR_PATHWAY		55	0.454664	1.9034	0	0.0671942	0.702	5328	tags=45%, list=26%, signal=61%
PID_NFKAPPAB_CANONICAL_PATHWAY	PID_NFKAPPAB_CANONICAL_PATHWAY		23	0.600425	1.90234	0.00201207	0.0669816	0.705	5510	tags=48%, list=27%, signal=65%
BROWNE_HCMV_INFECTION_20HR_DN	BROWNE_HCMV_INFECTION_20HR_DN		101	0.561613	1.90098	0.00384615	0.0673097	0.712	5101	tags=55%, list=25%, signal=73%
MCBRYAN_PUBERTAL_TGFB1_TARGETS_UP	MCBRYAN_PUBERTAL_TGFB1_TARGETS_UP		169	0.521701	1.90038	0.00396825	0.0667762	0.714	3384	tags=33%, list=17%, signal=39%
GRUETZMANN_PANCREATIC_CANCER_UP	GRUETZMANN_PANCREATIC_CANCER_UP		354	0.454025	1.89894	0.00385356	0.0668824	0.718	5434	tags=44%, list=27%, signal=59%
BERNARD_PPAPDC1B_TARGETS_UP	BERNARD_PPAPDC1B_TARGETS_UP		39	0.473642	1.89676	0.00200803	0.0676872	0.727	6032	tags=46%, list=29%, signal=65%
REACTOME_DOWNREGULATION_OF_TGF_BETA_RECEPTOR_SIGNALING	REACTOME_DOWNREGULATION_OF_TGF_BETA_RECEPTOR_SIGNALING		21	0.492645	1.89571	0.00974659	0.0676907	0.731	3709	tags=29%, list=18%, signal=35%
SESTO_RESPONSE_TO_UV_C2	SESTO_RESPONSE_TO_UV_C2		52	0.472184	1.89487	0.01002	0.0675453	0.734	5346	tags=38%, list=26%, signal=52%
PID_INTEGRIN5_PATHWAY	PID_INTEGRIN5_PATHWAY		17	0.813321	1.8946	0	0.0670817	0.735	2262	tags=71%, list=11%, signal=79%
PID_TRAIL_PATHWAY	PID_TRAIL_PATHWAY		28	0.57537	1.8921	0.00603622	0.0682075	0.739	6564	tags=64%, list=32%, signal=94%
ABRAHAM_ALPC_VS_MULTIPLE_MYELOMA_UP	ABRAHAM_ALPC_VS_MULTIPLE_MYELOMA_UP		26	0.635453	1.89112	0	0.0680791	0.742	3837	tags=50%, list=19%, signal=61%
RUIZ_TNC_TARGETS_UP	RUIZ_TNC_TARGETS_UP		150	0.553448	1.88805	0.00205339	0.0692986	0.75	4648	tags=47%, list=23%, signal=60%
WILSON_PROTEASES_AT_TUMOR_BONE_INTERFACE_UP	WILSON_PROTEASES_AT_TUMOR_BONE_INTERFACE_UP		21	0.715121	1.88433	0.0020284	0.0708618	0.761	2895	tags=48%, list=14%, signal=55%
MARTINEZ_RESPONSE_TO_TRABECTEDIN	MARTINEZ_RESPONSE_TO_TRABECTEDIN		50	0.503397	1.88351	0.00417537	0.0707939	0.764	6015	tags=50%, list=29%, signal=71%
GARGALOVIC_RESPONSE_TO_OXIDIZED_PHOSPHOLIPIDS_TURQUOISE_UP	GARGALOVIC_RESPONSE_TO_OXIDIZED_PHOSPHOLIPIDS_TURQUOISE_UP		76	0.539125	1.88194	0.00589391	0.0710608	0.767	5333	tags=55%, list=26%, signal=74%
BHAT_ESR1_TARGETS_NOT_VIA_AKT1_DN	BHAT_ESR1_TARGETS_NOT_VIA_AKT1_DN		87	0.563226	1.8797	0	0.0718604	0.774	4223	tags=46%, list=21%, signal=58%
PID_VEGFR1_2_PATHWAY	PID_VEGFR1_2_PATHWAY		69	0.41877	1.87669	0.014	0.0731525	0.784	6564	tags=46%, list=32%, signal=68%
LINDVALL_IMMORTALIZED_BY_TERT_DN	LINDVALL_IMMORTALIZED_BY_TERT_DN		78	0.68128	1.86602	0	0.0794576	0.812	2750	tags=51%, list=13%, signal=59%
NEWMAN_ERCC6_TARGETS_DN	NEWMAN_ERCC6_TARGETS_DN		39	0.801569	1.86575	0	0.0789556	0.813	1911	tags=62%, list=9%, signal=68%
COULOUARN_TEMPORAL_TGFB1_SIGNATURE_UP	COULOUARN_TEMPORAL_TGFB1_SIGNATURE_UP		107	0.409936	1.86532	0	0.0786189	0.814	5880	tags=50%, list=29%, signal=70%
HADDAD_T_LYMPHOCYTE_AND_NK_PROGENITOR_UP	HADDAD_T_LYMPHOCYTE_AND_NK_PROGENITOR_UP		77	0.577125	1.86518	0	0.0779966	0.814	4237	tags=48%, list=21%, signal=60%
KEGG_FOCAL_ADHESION	KEGG_FOCAL_ADHESION		198	0.562366	1.86508	0	0.0773673	0.815	3285	tags=37%, list=16%, signal=43%
GUENTHER_GROWTH_SPHERICAL_VS_ADHERENT_DN	GUENTHER_GROWTH_SPHERICAL_VS_ADHERENT_DN		26	0.607613	1.8628	0.00793651	0.0781297	0.818	6476	tags=85%, list=32%, signal=124%
CLASPER_LYMPHATIC_VESSELS_DURING_METASTASIS_DN	CLASPER_LYMPHATIC_VESSELS_DURING_METASTASIS_DN		36	0.801232	1.8624	0	0.0776955	0.82	2129	tags=72%, list=10%, signal=80%
VERHAAK_GLIOBLASTOMA_MESENCHYMAL	VERHAAK_GLIOBLASTOMA_MESENCHYMAL		216	0.643138	1.86171	0.00193424	0.0775418	0.82	4738	tags=59%, list=23%, signal=76%
KINSEY_TARGETS_OF_EWSR1_FLII_FUSION_DN	KINSEY_TARGETS_OF_EWSR1_FLII_FUSION_DN		318	0.531915	1.86166	0	0.07691	0.82	3177	tags=35%, list=15%, signal=40%
CHANG_POU5F1_TARGETS_UP	CHANG_POU5F1_TARGETS_UP		15	0.761854	1.86159	0	0.076306	0.82	2572	tags=53%, list=13%, signal=61%
JOHNSTONE_PARVB_TARGETS_2_DN	JOHNSTONE_PARVB_TARGETS_2_DN		319	0.393075	1.85919	0.00585938	0.0770621	0.827	5468	tags=36%, list=27%, signal=48%
REACTOME_SIGNALING_BY_PDGF	REACTOME_SIGNALING_BY_PDGF		118	0.469719	1.85862	0.004158	0.0768864	0.829	4725	tags=40%, list=23%, signal=51%
REACTOME_SPHINGOLIPID_METABOLISM	REACTOME_SPHINGOLIPID_METABOLISM		62	0.537186	1.85829	0.0020284	0.0764585	0.83	3907	tags=37%, list=19%, signal=46%
CHANG_CORE_SERUM_RESPONSE_DN	CHANG_CORE_SERUM_RESPONSE_DN		205	0.451169	1.85513	0.00394477	0.0782769	0.837	5053	tags=40%, list=25%, signal=53%
REACTOME_SIGNALING_BY_TGF_BETA_RECEPTOR_COMPLEX	REACTOME_SIGNALING_BY_TGF_BETA_RECEPTOR_COMPLEX		60	0.379839	1.85478	0.0056926	0.0779666	0.839	5892	tags=37%, list=29%, signal=51%
URS_ADIPOCYTE_DIFFERENTIATION_DN	URS_ADIPOCYTE_DIFFERENTIATION_DN		30	0.674134	1.8521	0.00198413	0.0791643	0.845	1872	tags=40%, list=9%, signal=44%
KIM_WT1_TARGETS_12HR_DN	KIM_WT1_TARGETS_12HR_DN		202	0.408342	1.85164	0	0.0788332	0.845	4801	tags=32%, list=23%, signal=42%
KARLSSON_TGFB1_TARGETS_DN	KARLSSON_TGFB1_TARGETS_DN		204	0.385348	1.85007	0.00198807	0.0791582	0.848	5093	tags=34%, list=25%, signal=45%
KEGG_ECM_RECEPTOR_INTERACTION	KEGG_ECM_RECEPTOR_INTERACTION		83	0.69542	1.8489	0	0.0793819	0.85	2262	tags=48%, list=11%, signal=54%
SASAI_RESISTANCE_TO_NEOPLASTIC_TRANSFROMATION	SASAI_RESISTANCE_TO_NEOPLASTIC_TRANSFROMATION		50	0.686056	1.84749	0.00400802	0.0797202	0.855	3298	tags=56%, list=16%, signal=67%
REACTOME_SEMA4D_INDUCED_CELL_MIGRATION_AND_GROWTH_CONE_COLLAPSE	REACTOME_SEMA4D_INDUCED_CELL_MIGRATION_AND_GROWTH_CONE_COLLAPSE		24	0.529334	1.84569	0.004158	0.080419	0.857	5153	tags=38%, list=25%, signal=50%
VERRECCHIA_RESPONSE_TO_TGFB1_C1	VERRECCHIA_RESPONSE_TO_TGFB1_C1		19	0.663208	1.845	0.00804829	0.0803257	0.858	2589	tags=42%, list=13%, signal=48%
DELASERNA_MYOD_TARGETS_DN	DELASERNA_MYOD_TARGETS_DN		56	0.531786	1.84311	0.00389864	0.0810397	0.861	3022	tags=34%, list=15%, signal=40%
MILI_PSEUDOPODIA	MILI_PSEUDOPODIA		42	0.413787	1.83997	0.0116505	0.0825668	0.866	5515	tags=43%, list=27%, signal=59%
DANG_MYC_TARGETS_DN	DANG_MYC_TARGETS_DN		31	0.502246	1.83976	0.00566038	0.0821073	0.866	5233	tags=55%, list=26%, signal=74%
QI_PLASMACYTOMA_DN	QI_PLASMACYTOMA_DN		100	0.459891	1.83875	0.00578035	0.082243	0.867	4590	tags=36%, list=22%, signal=46%
BASSO_HAIRY_CELL_LEUKEMIA_UP	BASSO_HAIRY_CELL_LEUKEMIA_UP		80	0.59427	1.8372	0.00390625	0.0825785	0.868	4340	tags=49%, list=21%, signal=62%
REACTOME_EXTRACELLULAR_MATRIX_ORGANIZATION	REACTOME_EXTRACELLULAR_MATRIX_ORGANIZATION		86	0.716912	1.8361	0	0.0826761	0.869	1569	tags=51%, list=8%, signal=55%
SUNG_METASTASIS_STROMA_UP	SUNG_METASTASIS_STROMA_UP		107	0.521248	1.83425	0.00397614	0.0835217	0.874	5647	tags=52%, list=28%, signal=72%
LOPEZ_TRANSLATION_VIA_FN1_SIGNALING	LOPEZ_TRANSLATION_VIA_FN1_SIGNALING		35	0.478002	1.83323	0.00976562	0.083754	0.875	2231	tags=20%, list=11%, signal=22%
KENNY_CTNNB1_TARGETS_DN	KENNY_CTNNB1_TARGETS_DN		49	0.437817	1.83195	0.00407332	0.0840495	0.879	6207	tags=51%, list=30%, signal=73%
ALONSO_METASTASIS_EMT_UP	ALONSO_METASTASIS_EMT_UP		36	0.590128	1.83175	0.00391389	0.0836436	0.879	4561	tags=50%, list=22%, signal=64%
VANHARANTA_UTERINE_FIBROID_UP	VANHARANTA_UTERINE_FIBROID_UP		44	0.633797	1.8295	0.00197239	0.08463	0.885	1911	tags=36%, list=9%, signal=40%
YAGI_AML_SURVIVAL	YAGI_AML_SURVIVAL		122	0.384622	1.82581	0.00203252	0.086587	0.892	3927	tags=28%, list=19%, signal=34%
LI_WILMS_TUMOR_VS_FETAL_KIDNEY_1_UP	LI_WILMS_TUMOR_VS_FETAL_KIDNEY_1_UP		180	0.501869	1.82461	0.008	0.086896	0.894	4397	tags=43%, list=21%, signal=55%
GILDEA_METASTASIS	GILDEA_METASTASIS		30	0.682091	1.82422	0	0.0865449	0.894	2947	tags=50%, list=14%, signal=58%
GROSS_HYPOXIA_VIA_ELK3_AND_HIF1A_UP	GROSS_HYPOXIA_VIA_ELK3_AND_HIF1A_UP		140	0.447964	1.8222	0.00400802	0.0873553	0.897	4943	tags=36%, list=24%, signal=48%
KEGG_ADHERENS_JUNCTION	KEGG_ADHERENS_JUNCTION		73	0.467076	1.82118	0.00401606	0.0877545	0.901	4808	tags=34%, list=23%, signal=45%
PID_PDGFRB_PATHWAY	PID_PDGFRB_PATHWAY		127	0.419824	1.82037	0.0136452	0.087813	0.903	6376	tags=48%, list=31%, signal=69%
PID_LYMPH_ANGIOGENESIS_PATHWAY	PID_LYMPH_ANGIOGENESIS_PATHWAY		25	0.599177	1.81764	0.00798403	0.0890622	0.908	2921	tags=36%, list=14%, signal=42%
LU_EZH2_TARGETS_DN	LU_EZH2_TARGETS_DN		379	0.407287	1.81726	0	0.0887723	0.908	5574	tags=42%, list=27%, signal=57%
SHI_SPARC_TARGETS_UP	SHI_SPARC_TARGETS_UP		23	0.65924	1.81713	0	0.088285	0.908	2231	tags=30%, list=11%, signal=34%
WESTON_VEGFA_TARGETS_6HR	WESTON_VEGFA_TARGETS_6HR		59	0.641574	1.81565	0.00204082	0.0887346	0.912	2655	tags=42%, list=13%, signal=49%
KEGG_REGULATION_OF_ACTIN_CYTOSKELETON	KEGG_REGULATION_OF_ACTIN_CYTOSKELETON		210	0.475326	1.81507	0	0.0886051	0.913	4723	tags=39%, list=23%, signal=50%
JI_CARCINOGENESIS_BY_KRAS_AND_STK11_DN	JI_CARCINOGENESIS_BY_KRAS_AND_STK11_DN		17	0.838609	1.81402	0	0.0889439	0.914	2514	tags=82%, list=12%, signal=94%
KANG_AR_TARGETS_DN	KANG_AR_TARGETS_DN		19	0.761265	1.81366	0	0.0887228	0.914	2921	tags=63%, list=14%, signal=74%
DASU_IL6_SIGNALING_SCAR_DN	DASU_IL6_SIGNALING_SCAR_DN		16	0.761388	1.81307	0.0019802	0.0887246	0.914	3697	tags=75%, list=18%, signal=91%
FULCHER_INFLAMMATORY_RESPONSE_LECTIN_VS_LPS_DN	FULCHER_INFLAMMATORY_RESPONSE_LECTIN_VS_LPS_DN		439	0.548753	1.81267	0.00589391	0.0885596	0.914	5171	tags=51%, list=25%, signal=67%
HAHTOLA_MYCOSIS_FUNGOIDES_UP	HAHTOLA_MYCOSIS_FUNGOIDES_UP		19	0.724586	1.81164	0.00197628	0.0890258	0.915	3358	tags=47%, list=16%, signal=57%
WILCOX_RESPONSE_TO_PROGESTERONE_DN	WILCOX_RESPONSE_TO_PROGESTERONE_DN		63	0.622492	1.8114	0.00395257	0.0886321	0.915	3288	tags=48%, list=16%, signal=57%
BIOCARTA_HCMV_PATHWAY	BIOCARTA_HCMV_PATHWAY		17	0.568804	1.81052	0.00581395	0.0887272	0.917	5776	tags=53%, list=28%, signal=74%
GOTZMANN_EPITHELIAL_TO_MESENCHYMAL_TRANSITION_UP	GOTZMANN_EPITHELIAL_TO_MESENCHYMAL_TRANSITION_UP		69	0.570109	1.81004	0	0.0885041	0.917	4209	tags=48%, list=21%, signal=60%
LI_WILMS_TUMOR_VS_FETAL_KIDNEY_2_DN	LI_WILMS_TUMOR_VS_FETAL_KIDNEY_2_DN		51	0.634623	1.80692	0.004	0.0905458	0.923	4295	tags=59%, list=21%, signal=74%
CHIARADONNA_NEOPLASTIC_TRANSFORMATION_KRAS_DN	CHIARADONNA_NEOPLASTIC_TRANSFORMATION_KRAS_DN		141	0.524675	1.80653	0.00195695	0.0902619	0.924	3967	tags=34%, list=19%, signal=42%
BHAT_ESR1_TARGETS_VIA_AKT1_DN	BHAT_ESR1_TARGETS_VIA_AKT1_DN		82	0.538191	1.80561	0	0.0904277	0.925	3363	tags=38%, list=16%, signal=45%
BENPORATH_NOS_TARGETS	BENPORATH_NOS_TARGETS		173	0.45192	1.80066	0	0.0940015	0.936	4237	tags=32%, list=21%, signal=40%
DAIRKEE_TERT_TARGETS_DN	DAIRKEE_TERT_TARGETS_DN		117	0.482049	1.79976	0	0.0942046	0.938	4974	tags=46%, list=24%, signal=61%
DAVICIONI_TARGETS_OF_PAX_FOXO1_FUSIONS_UP	DAVICIONI_TARGETS_OF_PAX_FOXO1_FUSIONS_UP		254	0.527423	1.79948	0	0.0938755	0.938	3332	tags=36%, list=16%, signal=42%
PID_INTEGRIN_A4B1_PATHWAY	PID_INTEGRIN_A4B1_PATHWAY		33	0.563422	1.79929	0.011976	0.0934586	0.938	4612	tags=42%, list=22%, signal=55%
LANDIS_BREAST_CANCER_PROGRESSION_DN	LANDIS_BREAST_CANCER_PROGRESSION_DN		70	0.617637	1.7964	0.00200803	0.0951735	0.942	3067	tags=46%, list=15%, signal=54%
REACTOME_YAP1_AND_WWTR1_TAZ_STIMULATED_GENE_EXPRESSION	REACTOME_YAP1_AND_WWTR1_TAZ_STIMULATED_GENE_EXPRESSION		24	0.581128	1.79591	0	0.0950293	0.943	5216	tags=58%, list=25%, signal=78%
PETRETTO_CARDIAC_HYPERTROPHY	PETRETTO_CARDIAC_HYPERTROPHY		34	0.671761	1.79326	0.00809717	0.09653	0.945	3111	tags=44%, list=15%, signal=52%
WIEDERSCHAIN_TARGETS_OF_BMI1_AND_PCGF2	WIEDERSCHAIN_TARGETS_OF_BMI1_AND_PCGF2		56	0.669421	1.79207	0	0.0970515	0.946	3339	tags=52%, list=16%, signal=62%
ANASTASSIOU_MULTICANCER_INVASIVENESS_SIGNATURE	ANASTASSIOU_MULTICANCER_INVASIVENESS_SIGNATURE		64	0.912843	1.79204	0	0.0965152	0.946	1231	tags=92%, list=6%, signal=98%
PID_SYNDECAN_1_PATHWAY	PID_SYNDECAN_1_PATHWAY		46	0.719967	1.79151	0	0.0964847	0.946	1755	tags=57%, list=9%, signal=62%
NELSON_RESPONSE_TO_ANDROGEN_UP	NELSON_RESPONSE_TO_ANDROGEN_UP		84	0.502994	1.79144	0.0121951	0.0959477	0.946	4897	tags=46%, list=24%, signal=61%
MILI_PSEUDOPODIA_CHEMOTAXIS_UP	MILI_PSEUDOPODIA_CHEMOTAXIS_UP		70	0.354768	1.7895	0.0119048	0.0968867	0.948	5515	tags=39%, list=27%, signal=53%
ZHENG_FOXP3_TARGETS_IN_THYMUS_UP	ZHENG_FOXP3_TARGETS_IN_THYMUS_UP		189	0.518962	1.78795	0.00205339	0.0976218	0.95	5146	tags=47%, list=25%, signal=62%
RIGGI_EWING_SARCOMA_PROGENITOR_DN	RIGGI_EWING_SARCOMA_PROGENITOR_DN		175	0.669976	1.78716	0	0.0977874	0.95	2660	tags=50%, list=13%, signal=57%
KOBAYASHI_EGFR_SIGNALING_24HR_UP	KOBAYASHI_EGFR_SIGNALING_24HR_UP		98	0.514503	1.78598	0.00408998	0.0981562	0.95	5119	tags=43%, list=25%, signal=57%
LINSLEY_MIR16_TARGETS	LINSLEY_MIR16_TARGETS		203	0.300282	1.78363	0.00402414	0.0996646	0.951	6484	tags=36%, list=32%, signal=52%
PID_SMAD2_3PATHWAY	PID_SMAD2_3PATHWAY		17	0.54028	1.78183	0.0164609	0.100517	0.952	8076	tags=53%, list=39%, signal=87%
GAUSSMANN_MLL_AF4_FUSION_TARGETS_C_UP	GAUSSMANN_MLL_AF4_FUSION_TARGETS_C_UP		163	0.421608	1.7812	0	0.100585	0.952	4461	tags=34%, list=22%, signal=43%
IGLESIAS_E2F_TARGETS_UP	IGLESIAS_E2F_TARGETS_UP		150	0.506426	1.78018	0.0201207	0.101044	0.952	5184	tags=44%, list=25%, signal=58%
PID_FAS_PATHWAY	PID_FAS_PATHWAY		38	0.521379	1.78004	0.00594059	0.100564	0.952	6337	tags=63%, list=31%, signal=91%
GRYDER_PAX3FOXO1_TOP_ENHANCERS	GRYDER_PAX3FOXO1_TOP_ENHANCERS		426	0.338701	1.77997	0.00196078	0.10009	0.952	5607	tags=34%, list=27%, signal=45%
REACTOME_ASSOCIATION_OF_TRIC_CCT_WITH_TARGET_PROTEINS_DURING_BIOSYNTHESIS	REACTOME_ASSOCIATION_OF_TRIC_CCT_WITH_TARGET_PROTEINS_DURING_BIOSYNTHESIS		26	0.424978	1.77928	0.0159363	0.100145	0.952	4107	tags=35%, list=20%, signal=43%
HOSHIDA_LIVER_CANCER_SURVIVAL_UP	HOSHIDA_LIVER_CANCER_SURVIVAL_UP		73	0.549749	1.77877	0.00194175	0.0999755	0.953	2800	tags=33%, list=14%, signal=38%
NAKAMURA_ADIPOGENESIS_EARLY_DN	NAKAMURA_ADIPOGENESIS_EARLY_DN		38	0.702536	1.7778	0	0.100332	0.954	2398	tags=55%, list=12%, signal=62%
TONKS_TARGETS_OF_RUNX1_RUNX1T1_FUSION_HSC_UP	TONKS_TARGETS_OF_RUNX1_RUNX1T1_FUSION_HSC_UP		182	0.528386	1.7759	0.00201207	0.101359	0.956	5516	tags=53%, list=27%, signal=72%
PID_INTEGRIN_CS_PATHWAY	PID_INTEGRIN_CS_PATHWAY		26	0.734232	1.77486	0	0.10171	0.956	2921	tags=54%, list=14%, signal=63%
BRUECKNER_TARGETS_OF_MIRLET7A3_DN	BRUECKNER_TARGETS_OF_MIRLET7A3_DN		76	0.562673	1.77468	0.0114943	0.101354	0.956	2792	tags=37%, list=14%, signal=42%
GRADE_COLON_VS_RECTAL_CANCER_UP	GRADE_COLON_VS_RECTAL_CANCER_UP		38	0.500569	1.77237	0.00982318	0.102731	0.961	2954	tags=24%, list=14%, signal=28%
BROWNE_HCMV_INFECTION_4HR_UP	BROWNE_HCMV_INFECTION_4HR_UP		53	0.606905	1.77234	0.00204082	0.102231	0.961	3756	tags=42%, list=18%, signal=51%
REACTOME_MAP_KINASE_ACTIVATION_IN_TLR_CASCADE	REACTOME_MAP_KINASE_ACTIVATION_IN_TLR_CASCADE		49	0.403077	1.77218	0.015873	0.101893	0.961	6564	tags=49%, list=32%, signal=72%
BIOCARTA_RHO_PATHWAY	BIOCARTA_RHO_PATHWAY		32	0.471929	1.77141	0.0241449	0.102018	0.962	6958	tags=56%, list=34%, signal=85%
DAZARD_UV_RESPONSE_CLUSTER_G6	DAZARD_UV_RESPONSE_CLUSTER_G6		145	0.422911	1.7714	0.0118812	0.101513	0.962	5555	tags=39%, list=27%, signal=54%
MONNIER_POSTRADIATION_TUMOR_ESCAPE_UP	MONNIER_POSTRADIATION_TUMOR_ESCAPE_UP		383	0.30955	1.77053	0	0.101717	0.964	4955	tags=27%, list=24%, signal=35%
SCHAEFFER_PROSTATE_DEVELOPMENT_AND_CANCER_BOX4_DN	SCHAEFFER_PROSTATE_DEVELOPMENT_AND_CANCER_BOX4_DN		31	0.443888	1.77003	0.0254902	0.101541	0.965	6172	tags=35%, list=30%, signal=51%
GARGALOVIC_RESPONSE_TO_OXIDIZED_PHOSPHOLIPIDS_GREY_UP	GARGALOVIC_RESPONSE_TO_OXIDIZED_PHOSPHOLIPIDS_GREY_UP		18	0.67881	1.76924	0.00202429	0.101874	0.966	3494	tags=50%, list=17%, signal=60%
PID_INTEGRIN_A9B1_PATHWAY	PID_INTEGRIN_A9B1_PATHWAY		25	0.705405	1.76891	0	0.101624	0.967	2921	tags=48%, list=14%, signal=56%
IZADPANAH_STEM_CELL_ADIPOSE_VS_BONE_DN	IZADPANAH_STEM_CELL_ADIPOSE_VS_BONE_DN		107	0.600563	1.76855	0.00402414	0.101479	0.967	2797	tags=43%, list=14%, signal=50%
BURTON_ADIPOGENESIS_7	BURTON_ADIPOGENESIS_7		50	0.574309	1.76842	0.00988142	0.101116	0.967	3233	tags=42%, list=16%, signal=50%
PID_NETRIN_PATHWAY	PID_NETRIN_PATHWAY		32	0.540503	1.76833	0.0159681	0.100707	0.967	5153	tags=34%, list=25%, signal=46%
RICKMAN_TUMOR_DIFFERENTIATED_WELL_VS_POORLY_DN	RICKMAN_TUMOR_DIFFERENTIATED_WELL_VS_POORLY_DN		375	0.484735	1.76822	0.0077821	0.100302	0.967	5361	tags=44%, list=26%, signal=59%
JEON_SMAD6_TARGETS_UP	JEON_SMAD6_TARGETS_UP		24	0.739125	1.76802	0.00198807	0.0999374	0.967	4609	tags=71%, list=22%, signal=91%
LU_TUMOR_VASCULATURE_UP	LU_TUMOR_VASCULATURE_UP		29	0.747728	1.76781	0.00205761	0.0995824	0.967	2105	tags=55%, list=10%, signal=61%
GENTILE_UV_RESPONSE_CLUSTER_D4	GENTILE_UV_RESPONSE_CLUSTER_D4		54	0.407289	1.7665	0.00796813	0.100358	0.97	5840	tags=31%, list=28%, signal=44%
HOLLERN_EMT_BREAST_TUMOR_UP	HOLLERN_EMT_BREAST_TUMOR_UP		106	0.668748	1.7664	0.00199203	0.0999833	0.97	3797	tags=63%, list=19%, signal=77%
NAKAMURA_ADIPOGENESIS_LATE_DN	NAKAMURA_ADIPOGENESIS_LATE_DN		38	0.672721	1.76586	0.00204082	0.0999268	0.971	1741	tags=45%, list=8%, signal=49%
TONKS_TARGETS_OF_RUNX1_RUNX1T1_FUSION_ERYTHROCYTE_UP	TONKS_TARGETS_OF_RUNX1_RUNX1T1_FUSION_ERYTHROCYTE_UP		156	0.568126	1.7646	0.00189394	0.100568	0.974	4087	tags=43%, list=20%, signal=53%
REACTOME_DEGRADATION_OF_THE_EXTRACELLULAR_MATRIX	REACTOME_DEGRADATION_OF_THE_EXTRACELLULAR_MATRIX		28	0.735229	1.76327	0	0.101156	0.975	1315	tags=50%, list=6%, signal=53%
SA_PTEN_PATHWAY	SA_PTEN_PATHWAY		17	0.573784	1.76318	0.00782779	0.100763	0.975	7569	tags=71%, list=37%, signal=112%
VERRECCHIA_RESPONSE_TO_TGFB1_C5	VERRECCHIA_RESPONSE_TO_TGFB1_C5		21	0.62507	1.76126	0.00191571	0.102043	0.976	1035	tags=24%, list=5%, signal=25%
LANDIS_ERBB2_BREAST_TUMORS_324_DN	LANDIS_ERBB2_BREAST_TUMORS_324_DN		147	0.51502	1.76044	0.00793651	0.102326	0.977	3111	tags=32%, list=15%, signal=37%
PID_S1P_S1P3_PATHWAY	PID_S1P_S1P3_PATHWAY		29	0.543933	1.75973	0.0194553	0.102312	0.977	3672	tags=38%, list=18%, signal=46%
KIM_WT1_TARGETS_UP	KIM_WT1_TARGETS_UP		211	0.504279	1.75904	0.00976562	0.10257	0.978	4888	tags=44%, list=24%, signal=57%
LIEN_BREAST_CARCINOMA_METAPLASTIC	LIEN_BREAST_CARCINOMA_METAPLASTIC		35	0.777652	1.75835	0	0.102794	0.979	3175	tags=71%, list=15%, signal=84%
CARD_MIR302A_TARGETS	CARD_MIR302A_TARGETS		75	0.483294	1.75813	0.0056926	0.102579	0.979	6061	tags=49%, list=30%, signal=70%
HOWLIN_CITED1_TARGETS_1_DN	HOWLIN_CITED1_TARGETS_1_DN		37	0.534465	1.75784	0.00205339	0.102389	0.979	4784	tags=51%, list=23%, signal=67%
PID_ERBB1_RECEPTOR_PROXIMAL_PATHWAY	PID_ERBB1_RECEPTOR_PROXIMAL_PATHWAY		35	0.423744	1.75757	0.0158416	0.102165	0.979	8055	tags=71%, list=39%, signal=117%
CHIBA_RESPONSE_TO_TSA_DN	CHIBA_RESPONSE_TO_TSA_DN		23	0.675674	1.75721	0.00393701	0.102084	0.98	3237	tags=43%, list=16%, signal=52%
AZARE_STAT3_TARGETS	AZARE_STAT3_TARGETS		23	0.65923	1.7571	0.00397614	0.101743	0.98	4350	tags=52%, list=21%, signal=66%
KHETCHOUMIAN_TRIM24_TARGETS_UP	KHETCHOUMIAN_TRIM24_TARGETS_UP		47	0.595747	1.75629	0.00601202	0.102032	0.981	4289	tags=53%, list=21%, signal=67%
GERHOLD_ADIPOGENESIS_DN	GERHOLD_ADIPOGENESIS_DN		64	0.526437	1.75616	0.00595238	0.101702	0.981	3669	tags=38%, list=18%, signal=46%
ALCALAY_AML_BY_NPM1_LOCALIZATION_UP	ALCALAY_AML_BY_NPM1_LOCALIZATION_UP		134	0.504409	1.75516	0.00198413	0.102142	0.981	5176	tags=46%, list=25%, signal=61%
CHARAFE_BREAST_CANCER_BASAL_VS_MESENCHYMAL_DN	CHARAFE_BREAST_CANCER_BASAL_VS_MESENCHYMAL_DN		48	0.700078	1.75492	0.00198413	0.101947	0.981	3208	tags=54%, list=16%, signal=64%
REACTOME_DOWNSTREAM_SIGNAL_TRANSDUCTION	REACTOME_DOWNSTREAM_SIGNAL_TRANSDUCTION		91	0.393083	1.75413	0.012474	0.102252	0.981	5475	tags=37%, list=27%, signal=51%
BROWNE_HCMV_INFECTION_10HR_DN	BROWNE_HCMV_INFECTION_10HR_DN		55	0.482227	1.75398	0.0059761	0.101942	0.981	5494	tags=55%, list=27%, signal=74%
REACTOME_SIGNALING_BY_RHO_GTPASES	REACTOME_SIGNALING_BY_RHO_GTPASES		108	0.488971	1.75235	0.00578035	0.102933	0.983	5191	tags=41%, list=25%, signal=54%
OKAMOTO_LIVER_CANCER_MULTICENTRIC_OCCURRENCE_UP	OKAMOTO_LIVER_CANCER_MULTICENTRIC_OCCURRENCE_UP		23	0.569635	1.75047	0.0155945	0.10419	0.983	4705	tags=48%, list=23%, signal=62%
GENTILE_UV_HIGH_DOSE_DN	GENTILE_UV_HIGH_DOSE_DN		306	0.344768	1.75004	0.0194175	0.104149	0.983	6005	tags=36%, list=29%, signal=50%
KIM_WT1_TARGETS_12HR_UP	KIM_WT1_TARGETS_12HR_UP		159	0.489102	1.74981	0.00397614	0.103906	0.983	4889	tags=41%, list=24%, signal=53%
ZHU_SKIL_TARGETS_UP	ZHU_SKIL_TARGETS_UP		20	0.706771	1.74936	0	0.103865	0.983	1975	tags=40%, list=10%, signal=44%
CHARAFE_BREAST_CANCER_LUMINAL_VS_MESENCHYMAL_DN	CHARAFE_BREAST_CANCER_LUMINAL_VS_MESENCHYMAL_DN		452	0.620769	1.74883	0.00403226	0.103918	0.983	3262	tags=47%, list=16%, signal=55%
BROWNE_HCMV_INFECTION_6HR_DN	BROWNE_HCMV_INFECTION_6HR_DN		156	0.443919	1.74767	0.00603622	0.10447	0.984	5305	tags=36%, list=26%, signal=48%
GRYDER_PAX3FOXO1_ENHANCERS_KO_DOWN	GRYDER_PAX3FOXO1_ENHANCERS_KO_DOWN		424	0.408443	1.74736	0	0.104289	0.984	4362	tags=31%, list=21%, signal=39%
RODWELL_AGING_KIDNEY_NO_BLOOD_UP	RODWELL_AGING_KIDNEY_NO_BLOOD_UP		214	0.561149	1.74704	0.00401606	0.104149	0.984	2869	tags=40%, list=14%, signal=46%
REACTOME_TGF_BETA_RECEPTOR_SIGNALING_ACTIVATES_SMADS	REACTOME_TGF_BETA_RECEPTOR_SIGNALING_ACTIVATES_SMADS		24	0.431267	1.74608	0.0193424	0.104564	0.984	3709	tags=25%, list=18%, signal=30%
HERNANDEZ_ABERRANT_MITOSIS_BY_DOCETACEL_4NM_UP	HERNANDEZ_ABERRANT_MITOSIS_BY_DOCETACEL_4NM_UP		21	0.682554	1.7459	0.00594059	0.104305	0.984	2187	tags=52%, list=11%, signal=59%
GAUSSMANN_MLL_AF4_FUSION_TARGETS_A_UP	GAUSSMANN_MLL_AF4_FUSION_TARGETS_A_UP		188	0.45149	1.74569	0	0.103974	0.984	4534	tags=38%, list=22%, signal=49%
GENTILE_UV_RESPONSE_CLUSTER_D6	GENTILE_UV_RESPONSE_CLUSTER_D6		36	0.52417	1.74556	0.0181818	0.103647	0.984	3574	tags=36%, list=17%, signal=44%
LANDIS_ERBB2_BREAST_TUMORS_65_DN	LANDIS_ERBB2_BREAST_TUMORS_65_DN		37	0.595403	1.74396	0.0114286	0.104573	0.984	3363	tags=35%, list=16%, signal=42%
BOQUEST_STEM_CELL_UP	BOQUEST_STEM_CELL_UP		258	0.733546	1.74363	0	0.104338	0.984	2669	tags=59%, list=13%, signal=67%
ROZANOV_MMP14_TARGETS_UP	ROZANOV_MMP14_TARGETS_UP		257	0.527297	1.7436	0	0.103952	0.984	4331	tags=46%, list=21%, signal=58%
CORRE_MULTIPLE_MYELOMA_DN	CORRE_MULTIPLE_MYELOMA_DN		59	0.657524	1.74351	0	0.103588	0.984	3299	tags=54%, list=16%, signal=64%
REACTOME_SIGNALING_BY_HIPPO	REACTOME_SIGNALING_BY_HIPPO		18	0.573039	1.74325	0.0198807	0.103299	0.984	3398	tags=44%, list=17%, signal=53%
BIDUS_METASTASIS_DN	BIDUS_METASTASIS_DN		153	0.481285	1.74286	0.00823045	0.103178	0.984	5299	tags=42%, list=26%, signal=57%
KOKKINAKIS_METHIONINE_DEPRIVATION_48HR_UP	KOKKINAKIS_METHIONINE_DEPRIVATION_48HR_UP		126	0.451668	1.74087	0.00389105	0.104413	0.984	5822	tags=44%, list=28%, signal=61%
CHIARADONNA_NEOPLASTIC_TRANSFORMATION_CDC25_UP	CHIARADONNA_NEOPLASTIC_TRANSFORMATION_CDC25_UP		118	0.53978	1.74029	0.0152964	0.104454	0.984	3726	tags=43%, list=18%, signal=53%
DURAND_STROMA_S_UP	DURAND_STROMA_S_UP		294	0.577165	1.73897	0	0.105178	0.984	3247	tags=45%, list=16%, signal=53%
CAIRO_HEPATOBLASTOMA_UP	CAIRO_HEPATOBLASTOMA_UP		204	0.346471	1.73896	0.00819672	0.104773	0.984	5942	tags=35%, list=29%, signal=49%
PHONG_TNF_RESPONSE_NOT_VIA_P38	PHONG_TNF_RESPONSE_NOT_VIA_P38		332	0.457466	1.7385	0.00808081	0.104703	0.984	5468	tags=42%, list=27%, signal=56%
WEI_MIR34A_TARGETS	WEI_MIR34A_TARGETS		145	0.386586	1.73827	0.00579151	0.10445	0.984	5202	tags=32%, list=25%, signal=43%
MCBRYAN_PUBERTAL_BREAST_5_6WK_DN	MCBRYAN_PUBERTAL_BREAST_5_6WK_DN		132	0.382115	1.73814	0.0182556	0.104114	0.984	5363	tags=36%, list=26%, signal=49%
THUM_SYSTOLIC_HEART_FAILURE_UP	THUM_SYSTOLIC_HEART_FAILURE_UP		402	0.518935	1.73711	0.0102459	0.104681	0.984	5250	tags=45%, list=26%, signal=59%
HORIUCHI_WTAP_TARGETS_UP	HORIUCHI_WTAP_TARGETS_UP		289	0.490517	1.73669	0.00199203	0.104668	0.984	5755	tags=54%, list=28%, signal=74%
ZWANG_CLASS_1_TRANSIENTLY_INDUCED_BY_EGF	ZWANG_CLASS_1_TRANSIENTLY_INDUCED_BY_EGF		499	0.431731	1.73614	0	0.104682	0.984	5655	tags=44%, list=28%, signal=60%
KONDO_EZH2_TARGETS	KONDO_EZH2_TARGETS		232	0.526351	1.73569	0.00393701	0.104742	0.984	4253	tags=43%, list=21%, signal=54%
FOSTER_TOLERANT_MACROPHAGE_DN	FOSTER_TOLERANT_MACROPHAGE_DN		403	0.473094	1.73538	0.01	0.104547	0.984	4443	tags=37%, list=22%, signal=47%
SENESE_HDAC1_TARGETS_DN	SENESE_HDAC1_TARGETS_DN		243	0.525657	1.73454	0.00603622	0.104823	0.984	3557	tags=39%, list=17%, signal=47%
WATANABE_ULCERATIVE_COLITIS_WITH_CANCER_UP	WATANABE_ULCERATIVE_COLITIS_WITH_CANCER_UP		17	0.734787	1.73451	0.00199601	0.104442	0.984	474	tags=35%, list=2%, signal=36%
BIOCARTA_ECM_PATHWAY	BIOCARTA_ECM_PATHWAY		24	0.506327	1.73342	0.0118577	0.104936	0.985	7569	tags=67%, list=37%, signal=106%
WOOD_EBV_EBNA1_TARGETS_DN	WOOD_EBV_EBNA1_TARGETS_DN		47	0.546661	1.73256	0.00389105	0.105363	0.986	4459	tags=49%, list=22%, signal=62%
DASU_IL6_SIGNALING_SCAR_UP	DASU_IL6_SIGNALING_SCAR_UP		30	0.573549	1.73196	0.003861	0.105577	0.986	2310	tags=37%, list=11%, signal=41%
OISHI_CHOLANGIOMA_STEM_CELL_LIKE_DN	OISHI_CHOLANGIOMA_STEM_CELL_LIKE_DN		278	0.5564	1.73189	0.00199203	0.105217	0.986	2922	tags=38%, list=14%, signal=43%
BURTON_ADIPOGENESIS_2	BURTON_ADIPOGENESIS_2		72	0.485928	1.73175	0.0136187	0.104946	0.986	3756	tags=33%, list=18%, signal=41%
LEE_AGING_MUSCLE_DN	LEE_AGING_MUSCLE_DN		46	0.539999	1.73113	0.0143737	0.105172	0.986	1625	tags=24%, list=8%, signal=26%
LU_TUMOR_ENDOTHELIAL_MARKERS_UP	LU_TUMOR_ENDOTHELIAL_MARKERS_UP		22	0.756616	1.73047	0	0.105402	0.986	1708	tags=55%, list=8%, signal=59%
KEGG_PROSTATE_CANCER	KEGG_PROSTATE_CANCER		88	0.425481	1.73044	0.00379507	0.105039	0.986	4954	tags=36%, list=24%, signal=48%
KASLER_HDAC7_TARGETS_1_DN	KASLER_HDAC7_TARGETS_1_DN		17	0.543296	1.73038	0.012024	0.104742	0.986	4557	tags=41%, list=22%, signal=53%
KIM_GERMINAL_CENTER_T_HELPER_UP	KIM_GERMINAL_CENTER_T_HELPER_UP		65	0.498308	1.72963	0.0118577	0.104995	0.986	5308	tags=45%, list=26%, signal=60%
PID_RET_PATHWAY	PID_RET_PATHWAY		39	0.492165	1.72907	0.00988142	0.105085	0.986	6564	tags=51%, list=32%, signal=75%
BROWNE_HCMV_INFECTION_18HR_DN	BROWNE_HCMV_INFECTION_18HR_DN		174	0.505315	1.72889	0	0.104847	0.986	2457	tags=29%, list=12%, signal=32%
SESTO_RESPONSE_TO_UV_C8	SESTO_RESPONSE_TO_UV_C8		71	0.43469	1.72859	0.0120968	0.104691	0.986	4578	tags=32%, list=22%, signal=42%
BROWNE_HCMV_INFECTION_16HR_DN	BROWNE_HCMV_INFECTION_16HR_DN		85	0.545092	1.72598	0.00588235	0.106576	0.987	4193	tags=42%, list=20%, signal=53%
HAN_JNK_SINGALING_UP	HAN_JNK_SINGALING_UP		34	0.658376	1.7248	0.0104167	0.107278	0.987	3521	tags=44%, list=17%, signal=53%
GAZDA_DIAMOND_BLACKFAN_ANEMIA_MYELOID_UP	GAZDA_DIAMOND_BLACKFAN_ANEMIA_MYELOID_UP		29	0.545697	1.72408	0.00409836	0.107498	0.987	6187	tags=55%, list=30%, signal=79%
REACTOME_TRANSPORT_TO_THE_GOLGI_AND_SUBSEQUENT_MODIFICATION	REACTOME_TRANSPORT_TO_THE_GOLGI_AND_SUBSEQUENT_MODIFICATION		33	0.534414	1.72342	0.00785855	0.107694	0.987	5766	tags=55%, list=28%, signal=76%
MANALO_HYPOXIA_UP	MANALO_HYPOXIA_UP		202	0.507003	1.72315	0.0140281	0.10751	0.987	4035	tags=39%, list=20%, signal=48%
ST_JNK_MAPK_PATHWAY	ST_JNK_MAPK_PATHWAY		40	0.492002	1.72168	0.0242915	0.108502	0.988	6496	tags=60%, list=32%, signal=88%
PID_VEGFR1_PATHWAY	PID_VEGFR1_PATHWAY		26	0.537219	1.72115	0.023622	0.108629	0.988	8055	tags=73%, list=39%, signal=120%
CORRE_MULTIPLE_MYELOMA_UP	CORRE_MULTIPLE_MYELOMA_UP		68	0.663389	1.72094	0	0.108484	0.988	2895	tags=50%, list=14%, signal=58%
KOKKINAKIS_METHIONINE_DEPRIVATION_96HR_UP	KOKKINAKIS_METHIONINE_DEPRIVATION_96HR_UP		116	0.474549	1.7204	0.0121704	0.108619	0.988	5822	tags=47%, list=28%, signal=66%
LE_SKI_TARGETS_UP	LE_SKI_TARGETS_UP		17	0.766237	1.71955	0	0.109126	0.988	1991	tags=47%, list=10%, signal=52%
WU_HBX_TARGETS_1_DN	WU_HBX_TARGETS_1_DN		22	0.529688	1.71949	0.0184805	0.108785	0.988	4007	tags=50%, list=20%, signal=62%
KEGG_ARRHYTHMOGENIC_RIGHT_VENTRICULAR_CARDIOMYOPATHY_ARVC	KEGG_ARRHYTHMOGENIC_RIGHT_VENTRICULAR_CARDIOMYOPATHY_ARVC		74	0.609943	1.71855	0.00196464	0.109155	0.988	2983	tags=38%, list=15%, signal=44%
MAHADEVAN_GIST_MORPHOLOGICAL_SWITCH	MAHADEVAN_GIST_MORPHOLOGICAL_SWITCH		15	0.768336	1.71771	0.00584795	0.109483	0.988	3376	tags=67%, list=16%, signal=80%
SARTIPY_BLUNTED_BY_INSULIN_RESISTANCE_DN	SARTIPY_BLUNTED_BY_INSULIN_RESISTANCE_DN		18	0.521415	1.71722	0.00996016	0.109575	0.988	1926	tags=22%, list=9%, signal=25%
BIOCARTA_RAC1_PATHWAY	BIOCARTA_RAC1_PATHWAY		23	0.603115	1.71721	0.00596422	0.109226	0.988	4664	tags=48%, list=23%, signal=62%
STEIN_ESRRA_TARGETS_DN	STEIN_ESRRA_TARGETS_DN		101	0.326847	1.71681	0.0102041	0.109167	0.988	4407	tags=29%, list=21%, signal=36%
KIM_GLIS2_TARGETS_UP	KIM_GLIS2_TARGETS_UP		77	0.685592	1.71631	0.00389105	0.109228	0.988	2800	tags=55%, list=14%, signal=63%
GINESTIER_BREAST_CANCER_20Q13_AMPLIFICATION_UP	GINESTIER_BREAST_CANCER_20Q13_AMPLIFICATION_UP		117	0.475978	1.7158	0.0368852	0.109287	0.988	6335	tags=55%, list=31%, signal=79%
NABA_CORE_MATRISOME	NABA_CORE_MATRISOME		266	0.62786	1.71548	0.00198807	0.109216	0.988	2814	tags=51%, list=14%, signal=58%
BERENJENO_TRANSFORMED_BY_RHOA_REVERSIBLY_DN	BERENJENO_TRANSFORMED_BY_RHOA_REVERSIBLY_DN		28	0.677873	1.71506	0.00397614	0.10919	0.988	3175	tags=61%, list=15%, signal=72%
PID_RAC1_REG_PATHWAY	PID_RAC1_REG_PATHWAY		37	0.556118	1.71481	0.00976562	0.1091	0.989	3055	tags=30%, list=15%, signal=35%
PASQUALUCCI_LYMPHOMA_BY_GC_STAGE_UP	PASQUALUCCI_LYMPHOMA_BY_GC_STAGE_UP		279	0.358816	1.71465	0.00193424	0.108905	0.989	4614	tags=32%, list=23%, signal=41%
BIOCARTA_P38MAPK_PATHWAY	BIOCARTA_P38MAPK_PATHWAY		39	0.432748	1.71324	0.0244898	0.10976	0.989	6762	tags=54%, list=33%, signal=80%
KATSANOU_ELAVL1_TARGETS_DN	KATSANOU_ELAVL1_TARGETS_DN		146	0.524192	1.71233	0.00389105	0.110377	0.991	3861	tags=37%, list=19%, signal=45%
BROWNE_HCMV_INFECTION_8HR_UP	BROWNE_HCMV_INFECTION_8HR_UP		103	0.470559	1.71226	0.00578035	0.110039	0.991	3372	tags=29%, list=16%, signal=35%
HOOI_ST7_TARGETS_DN	HOOI_ST7_TARGETS_DN		114	0.504194	1.71114	0.00398406	0.110603	0.991	4812	tags=41%, list=23%, signal=54%
SMIRNOV_CIRCULATING_ENDOTHELIOCYTES_IN_CANCER_UP	SMIRNOV_CIRCULATING_ENDOTHELIOCYTES_IN_CANCER_UP		158	0.561233	1.70964	0.00196464	0.111662	0.991	3837	tags=44%, list=19%, signal=54%
CHIANG_LIVER_CANCER_SUBCLASS_INTERFERON_UP	CHIANG_LIVER_CANCER_SUBCLASS_INTERFERON_UP		26	0.76694	1.70855	0.00197239	0.112321	0.992	2992	tags=73%, list=15%, signal=85%
RADMACHER_AML_PROGNOSIS	RADMACHER_AML_PROGNOSIS		77	0.533112	1.70552	0.00199601	0.114924	0.992	4474	tags=45%, list=22%, signal=58%
GAUSSMANN_MLL_AF4_FUSION_TARGETS_F_UP	GAUSSMANN_MLL_AF4_FUSION_TARGETS_F_UP		184	0.571724	1.70543	0	0.114631	0.992	3438	tags=43%, list=17%, signal=51%
REACTOME_BMAL1_CLOCK_NPAS2_ACTIVATES_CIRCADIAN_EXPRESSION	REACTOME_BMAL1_CLOCK_NPAS2_ACTIVATES_CIRCADIAN_EXPRESSION		36	0.505969	1.70455	0.028169	0.115153	0.992	5840	tags=56%, list=28%, signal=78%
IVANOVSKA_MIR106B_TARGETS	IVANOVSKA_MIR106B_TARGETS		88	0.387283	1.70387	0.0120968	0.115384	0.993	5967	tags=41%, list=29%, signal=57%
BENPORATH_OCT4_TARGETS	BENPORATH_OCT4_TARGETS		281	0.387832	1.70369	0.00607287	0.11521	0.993	4176	tags=27%, list=20%, signal=33%
ZHU_CMV_8_HR_DN	ZHU_CMV_8_HR_DN		52	0.525554	1.70325	0.00978474	0.115255	0.993	3084	tags=33%, list=15%, signal=38%
PID_ERBB1_DOWNSTREAM_PATHWAY	PID_ERBB1_DOWNSTREAM_PATHWAY		104	0.318217	1.70266	0.0295749	0.115297	0.993	7914	tags=57%, list=39%, signal=92%
HAN_SATB1_TARGETS_DN	HAN_SATB1_TARGETS_DN		429	0.42869	1.70259	0	0.11499	0.993	4142	tags=35%, list=20%, signal=43%
DELYS_THYROID_CANCER_UP	DELYS_THYROID_CANCER_UP		441	0.52265	1.7018	0.00576923	0.115394	0.993	3678	tags=37%, list=18%, signal=44%
AMIT_EGF_RESPONSE_240_MCF10A	AMIT_EGF_RESPONSE_240_MCF10A		20	0.663976	1.70156	0.00400802	0.115236	0.993	2956	tags=45%, list=14%, signal=53%
TRAYNOR_RETT_SYNDROM_UP	TRAYNOR_RETT_SYNDROM_UP		43	0.702252	1.7014	0.0059761	0.115058	0.993	3412	tags=65%, list=17%, signal=78%
WOO_LIVER_CANCER_RECURRENCE_UP	WOO_LIVER_CANCER_RECURRENCE_UP		105	0.516829	1.70108	0.00793651	0.115	0.993	3414	tags=34%, list=17%, signal=41%
BROWNE_HCMV_INFECTION_48HR_DN	BROWNE_HCMV_INFECTION_48HR_DN		496	0.45133	1.70054	0.00193798	0.115137	0.993	3431	tags=30%, list=17%, signal=35%
BOQUEST_STEM_CELL_CULTURED_VS_FRESH_UP	BOQUEST_STEM_CELL_CULTURED_VS_FRESH_UP		423	0.557149	1.69951	0.00579151	0.115647	0.993	3376	tags=38%, list=16%, signal=44%
KIM_WT1_TARGETS_8HR_UP	KIM_WT1_TARGETS_8HR_UP		162	0.464072	1.69884	0.0197628	0.115863	0.993	4876	tags=41%, list=24%, signal=54%
REACTOME_COLLAGEN_FORMATION	REACTOME_COLLAGEN_FORMATION		58	0.713532	1.69599	0.0020284	0.118076	0.993	1569	tags=52%, list=8%, signal=56%
SENESE_HDAC1_AND_HDAC2_TARGETS_UP	SENESE_HDAC1_AND_HDAC2_TARGETS_UP		231	0.52038	1.69429	0.00387597	0.119239	0.994	4422	tags=45%, list=22%, signal=56%
REACTOME_OTHER_SEMAPHORIN_INTERACTIONS	REACTOME_OTHER_SEMAPHORIN_INTERACTIONS		15	0.723071	1.69398	0.00399202	0.119109	0.994	3513	tags=67%, list=17%, signal=80%
TAKEDA_TARGETS_OF_NUP98_HOXA9_FUSION_6HR_DN	TAKEDA_TARGETS_OF_NUP98_HOXA9_FUSION_6HR_DN		41	0.618531	1.69371	0.00585938	0.118989	0.994	2602	tags=37%, list=13%, signal=42%
BOYLAN_MULTIPLE_MYELOMA_C_DN	BOYLAN_MULTIPLE_MYELOMA_C_DN		55	0.523497	1.69288	0.00392927	0.119287	0.994	4637	tags=49%, list=23%, signal=63%
AMIT_EGF_RESPONSE_240_HELA	AMIT_EGF_RESPONSE_240_HELA		60	0.435532	1.69257	0.0191939	0.119205	0.994	1920	tags=15%, list=9%, signal=17%
MARCHINI_TRABECTEDIN_RESISTANCE_DN	MARCHINI_TRABECTEDIN_RESISTANCE_DN		48	0.496406	1.69243	0.0237154	0.118972	0.994	4898	tags=40%, list=24%, signal=52%
BONOME_OVARIAN_CANCER_SURVIVAL_SUBOPTIMAL_DEBULKING	BONOME_OVARIAN_CANCER_SURVIVAL_SUBOPTIMAL_DEBULKING		496	0.384328	1.69241	0.003861	0.118621	0.994	5127	tags=34%, list=25%, signal=44%
LIAO_HAVE_SOX4_BINDING_SITES	LIAO_HAVE_SOX4_BINDING_SITES		40	0.529289	1.6919	0.00193798	0.118771	0.994	2227	tags=33%, list=11%, signal=36%
BONOME_OVARIAN_CANCER_POOR_SURVIVAL_UP	BONOME_OVARIAN_CANCER_POOR_SURVIVAL_UP		30	0.699528	1.69128	0.0078125	0.118895	0.994	4185	tags=57%, list=20%, signal=71%
DURCHDEWALD_SKIN_CARCINOGENESIS_DN	DURCHDEWALD_SKIN_CARCINOGENESIS_DN		258	0.389674	1.69063	0.00197628	0.119162	0.994	5671	tags=46%, list=28%, signal=63%
QI_HYPOXIA_TARGETS_OF_HIF1A_AND_FOXA2	QI_HYPOXIA_TARGETS_OF_HIF1A_AND_FOXA2		37	0.4666	1.69014	0.0253411	0.119321	0.994	1710	tags=24%, list=8%, signal=26%
HERNANDEZ_ABERRANT_MITOSIS_BY_DOCETACEL_2NM_UP	HERNANDEZ_ABERRANT_MITOSIS_BY_DOCETACEL_2NM_UP		80	0.542049	1.6888	0.0020202	0.120125	0.994	4846	tags=51%, list=24%, signal=67%
REACTOME_SYNTHESIS_OF_PIPS_AT_THE_PLASMA_MEMBRANE	REACTOME_SYNTHESIS_OF_PIPS_AT_THE_PLASMA_MEMBRANE		30	0.541867	1.68791	0.0140562	0.120617	0.994	5768	tags=60%, list=28%, signal=83%
CAIRO_LIVER_DEVELOPMENT_UP	CAIRO_LIVER_DEVELOPMENT_UP		165	0.521244	1.68773	0.00809717	0.120418	0.994	3341	tags=34%, list=16%, signal=40%
BIOCARTA_MET_PATHWAY	BIOCARTA_MET_PATHWAY		37	0.457955	1.68576	0.0240964	0.121941	0.994	6564	tags=49%, list=32%, signal=71%
PID_SYNDECAN_2_PATHWAY	PID_SYNDECAN_2_PATHWAY		33	0.501712	1.68327	0.00773694	0.123868	0.994	4136	tags=42%, list=20%, signal=53%
NABA_ECM_GLYCOPROTEINS	NABA_ECM_GLYCOPROTEINS		189	0.609921	1.6832	0	0.123581	0.994	2814	tags=48%, list=14%, signal=55%
DAZARD_RESPONSE_TO_UV_SCC_DN	DAZARD_RESPONSE_TO_UV_SCC_DN		121	0.338971	1.68256	0.0159046	0.123796	0.994	5595	tags=32%, list=27%, signal=44%
SILIGAN_BOUND_BY_EWS_FLT1_FUSION	SILIGAN_BOUND_BY_EWS_FLT1_FUSION		47	0.603252	1.68159	0.00598802	0.12438	0.994	2797	tags=38%, list=14%, signal=44%
PID_ALK1_PATHWAY	PID_ALK1_PATHWAY		26	0.540019	1.68084	0.020202	0.124779	0.994	2694	tags=31%, list=13%, signal=35%
PETROVA_ENDOTHELIUM_LYMPHATIC_VS_BLOOD_DN	PETROVA_ENDOTHELIUM_LYMPHATIC_VS_BLOOD_DN		162	0.546636	1.68014	0.0121951	0.125149	0.994	3153	tags=35%, list=15%, signal=41%
XU_GH1_AUTOCRINE_TARGETS_DN	XU_GH1_AUTOCRINE_TARGETS_DN		135	0.454949	1.67925	0.0141988	0.125613	0.994	5039	tags=41%, list=25%, signal=55%
WENG_POR_TARGETS_LIVER_DN	WENG_POR_TARGETS_LIVER_DN		19	0.626313	1.67918	0.015625	0.125298	0.994	2986	tags=47%, list=15%, signal=55%
MISHRA_CARCINOMA_ASSOCIATED_FIBROBLAST_UP	MISHRA_CARCINOMA_ASSOCIATED_FIBROBLAST_UP		24	0.713545	1.67837	0.00204082	0.125661	0.994	1704	tags=46%, list=8%, signal=50%
MCCABE_HOXC6_TARGETS_DN	MCCABE_HOXC6_TARGETS_DN		21	0.708618	1.67747	0.00390625	0.126075	0.994	1722	tags=52%, list=8%, signal=57%
SUZUKI_AMPLIFIED_IN_ORAL_CANCER	SUZUKI_AMPLIFIED_IN_ORAL_CANCER		16	0.667794	1.67744	0.00980392	0.125724	0.994	4870	tags=63%, list=24%, signal=82%
REACTOME_AXON_GUIDANCE	REACTOME_AXON_GUIDANCE		240	0.472284	1.67705	0.0060241	0.125704	0.994	3376	tags=31%, list=16%, signal=36%
SEIDEN_ONCOGENESIS_BY_MET	SEIDEN_ONCOGENESIS_BY_MET		85	0.356083	1.67647	0.0496183	0.125915	0.994	6871	tags=40%, list=34%, signal=60%
OKUMURA_INFLAMMATORY_RESPONSE_LPS	OKUMURA_INFLAMMATORY_RESPONSE_LPS		181	0.430739	1.67573	0.002	0.12629	0.994	3356	tags=28%, list=16%, signal=33%
ZHENG_BOUND_BY_FOXP3	ZHENG_BOUND_BY_FOXP3		479	0.489708	1.67534	0.00813008	0.126369	0.994	4898	tags=41%, list=24%, signal=53%
PLASARI_TGFB1_TARGETS_10HR_UP	PLASARI_TGFB1_TARGETS_10HR_UP		197	0.557107	1.67528	0.00196078	0.126064	0.994	3105	tags=39%, list=15%, signal=45%
REACTOME_TRANS_GOLGI_NETWORK_VESICLE_BUDDING	REACTOME_TRANS_GOLGI_NETWORK_VESICLE_BUDDING		59	0.331287	1.67482	0.041502	0.126146	0.994	6302	tags=44%, list=31%, signal=63%
AMUNDSON_POOR_SURVIVAL_AFTER_GAMMA_RADIATION_8G	AMUNDSON_POOR_SURVIVAL_AFTER_GAMMA_RADIATION_8G		92	0.469955	1.67478	0.0177866	0.125831	0.994	5220	tags=49%, list=25%, signal=65%
MIKKELSEN_MEF_LCP_WITH_H3K4ME3	MIKKELSEN_MEF_LCP_WITH_H3K4ME3		125	0.544654	1.67457	0.00986193	0.12566	0.994	3430	tags=35%, list=17%, signal=42%
GAUSSMANN_MLL_AF4_FUSION_TARGETS_E_UP	GAUSSMANN_MLL_AF4_FUSION_TARGETS_E_UP		96	0.589224	1.67449	0.0060241	0.125334	0.994	3284	tags=48%, list=16%, signal=57%
BURTON_ADIPOGENESIS_PEAK_AT_0HR	BURTON_ADIPOGENESIS_PEAK_AT_0HR		62	0.596452	1.67399	0.0125	0.12545	0.994	3241	tags=42%, list=16%, signal=50%
BERENJENO_TRANSFORMED_BY_RHOA_FOREVER_DN	BERENJENO_TRANSFORMED_BY_RHOA_FOREVER_DN		31	0.606514	1.67341	0.00956023	0.125583	0.994	2011	tags=32%, list=10%, signal=36%
IGARASHI_ATF4_TARGETS_DN	IGARASHI_ATF4_TARGETS_DN		89	0.436482	1.67276	0.0116732	0.125865	0.994	4723	tags=38%, list=23%, signal=49%
ZIRN_TRETINOIN_RESPONSE_UP	ZIRN_TRETINOIN_RESPONSE_UP		19	0.671878	1.67168	0.00816326	0.126531	0.994	2188	tags=42%, list=11%, signal=47%
CUI_TCF21_TARGETS_UP	CUI_TCF21_TARGETS_UP		37	0.655793	1.66965	0.0038835	0.128143	0.994	2322	tags=51%, list=11%, signal=58%
SCHAEFFER_PROSTATE_DEVELOPMENT_48HR_DN	SCHAEFFER_PROSTATE_DEVELOPMENT_48HR_DN		422	0.548541	1.66955	0	0.127858	0.994	2773	tags=36%, list=14%, signal=41%
TRAYNOR_RETT_SYNDROM_DN	TRAYNOR_RETT_SYNDROM_DN		18	0.666352	1.66759	0.00796813	0.129618	0.994	2198	tags=50%, list=11%, signal=56%
BILD_SRC_ONCOGENIC_SIGNATURE	BILD_SRC_ONCOGENIC_SIGNATURE		59	0.40572	1.66741	0.0218688	0.129469	0.994	4981	tags=41%, list=24%, signal=54%
FARMER_BREAST_CANCER_CLUSTER_4	FARMER_BREAST_CANCER_CLUSTER_4		19	0.949275	1.6662	0	0.130269	0.994	1057	tags=100%, list=5%, signal=105%
VANTVEER_BREAST_CANCER_BRCA1_DN	VANTVEER_BREAST_CANCER_BRCA1_DN		42	0.600781	1.66568	0.022449	0.130417	0.994	3624	tags=50%, list=18%, signal=61%
BERTUCCI_MEDULLARY_VS_DUCTAL_BREAST_CANCER_DN	BERTUCCI_MEDULLARY_VS_DUCTAL_BREAST_CANCER_DN		163	0.563987	1.66556	0.0326531	0.13017	0.994	3536	tags=46%, list=17%, signal=55%
TOMLINS_METASTASIS_DN	TOMLINS_METASTASIS_DN		20	0.566582	1.66405	0.0236686	0.131384	0.995	4628	tags=40%, list=23%, signal=52%
KUNINGER_IGF1_VS_PDGFB_TARGETS_DN	KUNINGER_IGF1_VS_PDGFB_TARGETS_DN		46	0.568793	1.66357	0.0117417	0.131528	0.995	2736	tags=35%, list=13%, signal=40%
LINDGREN_BLADDER_CANCER_HIGH_RECURRENCE	LINDGREN_BLADDER_CANCER_HIGH_RECURRENCE		48	0.568659	1.6624	0.026	0.132505	0.995	1578	tags=33%, list=8%, signal=36%
GRANDVAUX_IRF3_TARGETS_DN	GRANDVAUX_IRF3_TARGETS_DN		19	0.632948	1.6624	0.0286885	0.132146	0.995	2935	tags=42%, list=14%, signal=49%
WONG_ENDMETRIUM_CANCER_DN	WONG_ENDMETRIUM_CANCER_DN		81	0.762159	1.66155	0.00397614	0.132746	0.995	2599	tags=63%, list=13%, signal=72%
WANG_CISPLATIN_RESPONSE_AND_XPC_DN	WANG_CISPLATIN_RESPONSE_AND_XPC_DN		224	0.353905	1.66093	0.022	0.132973	0.995	4330	tags=25%, list=21%, signal=32%
BIOCARTA_EIF4_PATHWAY	BIOCARTA_EIF4_PATHWAY		24	0.469248	1.66067	0.0300752	0.132887	0.995	6576	tags=63%, list=32%, signal=92%
VALK_AML_CLUSTER_11	VALK_AML_CLUSTER_11		36	0.564818	1.66038	0.011976	0.132866	0.995	4628	tags=53%, list=23%, signal=68%
BURTON_ADIPOGENESIS_12	BURTON_ADIPOGENESIS_12		34	0.492718	1.66037	0.0540541	0.132516	0.995	6307	tags=53%, list=31%, signal=76%
TOMLINS_PROSTATE_CANCER_DN	TOMLINS_PROSTATE_CANCER_DN		40	0.618701	1.66013	0.0223577	0.132474	0.995	4417	tags=60%, list=22%, signal=76%
KEGG_TGF_BETA_SIGNALING_PATHWAY	KEGG_TGF_BETA_SIGNALING_PATHWAY		85	0.527983	1.66001	0.00806452	0.132255	0.995	4590	tags=46%, list=22%, signal=59%
ZHAN_MULTIPLE_MYELOMA_MF_DN	ZHAN_MULTIPLE_MYELOMA_MF_DN		38	0.562358	1.65974	0.00819672	0.132235	0.995	5342	tags=53%, list=26%, signal=71%
VALK_AML_CLUSTER_10	VALK_AML_CLUSTER_10		31	0.606719	1.65908	0.0158416	0.132499	0.995	4754	tags=48%, list=23%, signal=63%
LANG_MYB_FAMILY_TARGETS	LANG_MYB_FAMILY_TARGETS		29	0.416003	1.6574	0.0344168	0.133643	0.995	5610	tags=41%, list=27%, signal=57%
BIOCARTA_PDGF_PATHWAY	BIOCARTA_PDGF_PATHWAY		32	0.515874	1.65738	0.028	0.133312	0.995	5579	tags=44%, list=27%, signal=60%
PID_TOLL_ENDOGENOUS_PATHWAY	PID_TOLL_ENDOGENOUS_PATHWAY		25	0.639383	1.65737	0.012	0.132975	0.995	2282	tags=36%, list=11%, signal=40%
PID_CERAMIDE_PATHWAY	PID_CERAMIDE_PATHWAY		48	0.384246	1.65734	0.0286885	0.132666	0.995	6564	tags=46%, list=32%, signal=67%
DUNNE_TARGETS_OF_AML1_MTG8_FUSION_DN	DUNNE_TARGETS_OF_AML1_MTG8_FUSION_DN		18	0.728624	1.65647	0.00390625	0.133185	0.995	2581	tags=50%, list=13%, signal=57%
REACTOME_CIRCADIAN_CLOCK	REACTOME_CIRCADIAN_CLOCK		52	0.432675	1.65644	0.0345528	0.132859	0.995	5523	tags=44%, list=27%, signal=60%
ZHAN_MULTIPLE_MYELOMA_CD1_DN	ZHAN_MULTIPLE_MYELOMA_CD1_DN		43	0.499659	1.65597	0.0160321	0.132966	0.995	5467	tags=53%, list=27%, signal=73%
RAGHAVACHARI_PLATELET_SPECIFIC_GENES	RAGHAVACHARI_PLATELET_SPECIFIC_GENES		70	0.476812	1.65554	0.00974659	0.133044	0.995	3741	tags=34%, list=18%, signal=42%
REACTOME_NETRIN1_SIGNALING	REACTOME_NETRIN1_SIGNALING		38	0.582454	1.65546	0.00982318	0.13282	0.995	1438	tags=24%, list=7%, signal=25%
BIOCARTA_NO1_PATHWAY	BIOCARTA_NO1_PATHWAY		30	0.612207	1.65444	0.0135922	0.133506	0.996	5303	tags=57%, list=26%, signal=76%
NIELSEN_GIST	NIELSEN_GIST		96	0.452645	1.65415	0.0137255	0.133451	0.996	5000	tags=42%, list=24%, signal=55%
PILON_KLF1_TARGETS_UP	PILON_KLF1_TARGETS_UP		495	0.392295	1.65412	0.0019084	0.133147	0.996	3650	tags=29%, list=18%, signal=34%
LINDVALL_IMMORTALIZED_BY_TERT_UP	LINDVALL_IMMORTALIZED_BY_TERT_UP		76	0.50367	1.65289	0.0177866	0.13412	0.996	2895	tags=30%, list=14%, signal=35%
STEARMAN_LUNG_CANCER_EARLY_VS_LATE_UP	STEARMAN_LUNG_CANCER_EARLY_VS_LATE_UP		124	0.316019	1.65281	0.0217391	0.133841	0.996	5676	tags=31%, list=28%, signal=43%
LI_CISPLATIN_RESISTANCE_UP	LI_CISPLATIN_RESISTANCE_UP		26	0.660141	1.65143	0.0039604	0.134893	0.996	2405	tags=50%, list=12%, signal=57%
BYSTROEM_CORRELATED_WITH_IL5_DN	BYSTROEM_CORRELATED_WITH_IL5_DN		63	0.473635	1.65041	0.0532544	0.13557	0.996	7339	tags=62%, list=36%, signal=96%
MORI_EMU_MYC_LYMPHOMA_BY_ONSET_TIME_DN	MORI_EMU_MYC_LYMPHOMA_BY_ONSET_TIME_DN		17	0.591476	1.65006	0.0141129	0.135626	0.996	2262	tags=29%, list=11%, signal=33%
NIELSEN_SCHWANNOMA_DN	NIELSEN_SCHWANNOMA_DN		17	0.734267	1.6492	0.00199601	0.136169	0.996	3119	tags=65%, list=15%, signal=76%
STARK_PREFRONTAL_CORTEX_22Q11_DELETION_UP	STARK_PREFRONTAL_CORTEX_22Q11_DELETION_UP		189	0.427108	1.64851	0.0217822	0.136552	0.996	4843	tags=35%, list=24%, signal=46%
PLASARI_TGFB1_TARGETS_10HR_DN	PLASARI_TGFB1_TARGETS_10HR_DN		243	0.547851	1.64702	0.00603622	0.137781	0.997	4593	tags=49%, list=22%, signal=62%
TSENG_ADIPOGENIC_POTENTIAL_DN	TSENG_ADIPOGENIC_POTENTIAL_DN		46	0.595681	1.64657	0.00811359	0.13795	0.997	2635	tags=43%, list=13%, signal=50%
THUM_MIR21_TARGETS_HEART_DISEASE_UP	THUM_MIR21_TARGETS_HEART_DISEASE_UP		17	0.827345	1.64592	0.00403226	0.138274	0.997	2531	tags=76%, list=12%, signal=87%
PID_CDC42_PATHWAY	PID_CDC42_PATHWAY		70	0.336187	1.64573	0.0346154	0.138134	0.997	6770	tags=49%, list=33%, signal=72%
ST_INTEGRIN_SIGNALING_PATHWAY	ST_INTEGRIN_SIGNALING_PATHWAY		81	0.435445	1.64548	0.0221774	0.138092	0.997	4664	tags=33%, list=23%, signal=43%
OUELLET_CULTURED_OVARIAN_CANCER_INVASIVE_VS_LMP_DN	OUELLET_CULTURED_OVARIAN_CANCER_INVASIVE_VS_LMP_DN		34	0.578281	1.64506	0.00590551	0.1382	0.997	3089	tags=41%, list=15%, signal=48%
YAO_TEMPORAL_RESPONSE_TO_PROGESTERONE_CLUSTER_8	YAO_TEMPORAL_RESPONSE_TO_PROGESTERONE_CLUSTER_8		48	0.509609	1.64475	0.00823045	0.13814	0.997	4035	tags=35%, list=20%, signal=44%
PETROVA_PROX1_TARGETS_DN	PETROVA_PROX1_TARGETS_DN		64	0.599421	1.6439	0.0257426	0.138601	0.997	3092	tags=38%, list=15%, signal=44%
FINETTI_BREAST_CANCERS_KINOME_GRAY	FINETTI_BREAST_CANCERS_KINOME_GRAY		15	0.657865	1.64355	0.00843882	0.138719	0.997	6370	tags=73%, list=31%, signal=106%
NABA_BASEMENT_MEMBRANES	NABA_BASEMENT_MEMBRANES		39	0.664029	1.643	0.00598802	0.139038	0.997	2072	tags=49%, list=10%, signal=54%
YAO_TEMPORAL_RESPONSE_TO_PROGESTERONE_CLUSTER_16	YAO_TEMPORAL_RESPONSE_TO_PROGESTERONE_CLUSTER_16		76	0.541408	1.64258	0.0306513	0.139083	0.997	3484	tags=43%, list=17%, signal=52%
KEGG_PANCREATIC_CANCER	KEGG_PANCREATIC_CANCER		70	0.416279	1.64248	0.0308285	0.138836	0.997	4664	tags=37%, list=23%, signal=48%
REACTOME_MEMBRANE_TRAFFICKING	REACTOME_MEMBRANE_TRAFFICKING		126	0.31499	1.64224	0.0295276	0.138725	0.998	4302	tags=23%, list=21%, signal=29%
GEORGANTAS_HSC_MARKERS	GEORGANTAS_HSC_MARKERS		65	0.58465	1.6419	0.0218688	0.138722	0.998	3323	tags=46%, list=16%, signal=55%
BASAKI_YBX1_TARGETS_DN	BASAKI_YBX1_TARGETS_DN		365	0.395971	1.64061	0.00806452	0.139648	0.999	3820	tags=28%, list=19%, signal=34%
HOLLERN_SOLID_NODULAR_BREAST_TUMOR_DN	HOLLERN_SOLID_NODULAR_BREAST_TUMOR_DN		30	0.675124	1.64027	0.00199601	0.139678	0.999	4035	tags=60%, list=20%, signal=75%
COLDREN_GEFITINIB_RESISTANCE_UP	COLDREN_GEFITINIB_RESISTANCE_UP		84	0.385503	1.63937	0.045283	0.140303	0.999	3846	tags=29%, list=19%, signal=35%
KEGG_LYSOSOME	KEGG_LYSOSOME		121	0.35691	1.63904	0.0529412	0.140307	0.999	6214	tags=39%, list=30%, signal=55%
GAL_LEUKEMIC_STEM_CELL_UP	GAL_LEUKEMIC_STEM_CELL_UP		127	0.392703	1.63883	0.00200401	0.140164	0.999	3802	tags=27%, list=19%, signal=33%
BURTON_ADIPOGENESIS_9	BURTON_ADIPOGENESIS_9		91	0.476112	1.63869	0.029703	0.139969	0.999	5425	tags=51%, list=26%, signal=68%
JOSEPH_RESPONSE_TO_SODIUM_BUTYRATE_DN	JOSEPH_RESPONSE_TO_SODIUM_BUTYRATE_DN		63	0.517357	1.63847	0.0196078	0.13989	0.999	3088	tags=30%, list=15%, signal=35%
REACTOME_SIGNAL_TRANSDUCTION_BY_L1	REACTOME_SIGNAL_TRANSDUCTION_BY_L1		34	0.495982	1.6379	0.0291262	0.140096	0.999	2921	tags=29%, list=14%, signal=34%
LINDGREN_BLADDER_CANCER_CLUSTER_2B	LINDGREN_BLADDER_CANCER_CLUSTER_2B		373	0.588517	1.63755	0.0301811	0.140099	0.999	3251	tags=45%, list=16%, signal=52%
KEGG_HYPERTROPHIC_CARDIOMYOPATHY_HCM	KEGG_HYPERTROPHIC_CARDIOMYOPATHY_HCM		83	0.58601	1.63738	0	0.139936	0.999	3092	tags=37%, list=15%, signal=44%
DAVICIONI_MOLECULAR_ARMS_VS_ERMS_DN	DAVICIONI_MOLECULAR_ARMS_VS_ERMS_DN		176	0.525732	1.63656	0.0142276	0.14051	0.999	3456	tags=36%, list=17%, signal=43%
BIOCARTA_IGF1_PATHWAY	BIOCARTA_IGF1_PATHWAY		21	0.531566	1.63636	0.0385396	0.140389	0.999	2412	tags=24%, list=12%, signal=27%
ENK_UV_RESPONSE_KERATINOCYTE_DN	ENK_UV_RESPONSE_KERATINOCYTE_DN		478	0.272991	1.63603	0.0365112	0.140415	0.999	5574	tags=31%, list=27%, signal=41%
KIM_MYCN_AMPLIFICATION_TARGETS_DN	KIM_MYCN_AMPLIFICATION_TARGETS_DN		98	0.412726	1.63577	0.0195695	0.1404	0.999	5623	tags=43%, list=27%, signal=59%
PEDERSEN_METASTASIS_BY_ERBB2_ISOFORM_4	PEDERSEN_METASTASIS_BY_ERBB2_ISOFORM_4		107	0.520911	1.63568	0.00400802	0.140179	0.999	4898	tags=52%, list=24%, signal=68%
SENESE_HDAC1_AND_HDAC2_TARGETS_DN	SENESE_HDAC1_AND_HDAC2_TARGETS_DN		221	0.517565	1.63519	0.016	0.140426	0.999	4693	tags=47%, list=23%, signal=60%
PID_SMAD2_3NUCLEAR_PATHWAY	PID_SMAD2_3NUCLEAR_PATHWAY		80	0.369527	1.63514	0.0120724	0.140148	0.999	2262	tags=18%, list=11%, signal=20%
PID_AR_PATHWAY	PID_AR_PATHWAY		60	0.386692	1.63503	0.0425532	0.139926	0.999	4437	tags=32%, list=22%, signal=40%
BEGUM_TARGETS_OF_PAX3_FOXO1_FUSION_UP	BEGUM_TARGETS_OF_PAX3_FOXO1_FUSION_UP		59	0.627892	1.63401	0.00808081	0.140658	0.999	3181	tags=47%, list=16%, signal=56%
KANG_DOXORUBICIN_RESISTANCE_DN	KANG_DOXORUBICIN_RESISTANCE_DN		19	0.511178	1.63174	0.0486381	0.142658	0.999	6567	tags=68%, list=32%, signal=101%
TSENG_IRS1_TARGETS_DN	TSENG_IRS1_TARGETS_DN		134	0.461944	1.63165	0.0176125	0.142426	0.999	4362	tags=38%, list=21%, signal=48%
PID_CDC42_REG_PATHWAY	PID_CDC42_REG_PATHWAY		29	0.450453	1.63104	0.032882	0.142741	0.999	5658	tags=45%, list=28%, signal=62%
YANAGIHARA_ESX1_TARGETS	YANAGIHARA_ESX1_TARGETS		28	0.579361	1.63095	0	0.142521	0.999	5841	tags=68%, list=28%, signal=95%
PID_ARF6_TRAFFICKING_PATHWAY	PID_ARF6_TRAFFICKING_PATHWAY		49	0.522746	1.6307	0.027833	0.142499	0.999	3329	tags=31%, list=16%, signal=36%
SEIDEN_MET_SIGNALING	SEIDEN_MET_SIGNALING		19	0.495243	1.62969	0.0384615	0.143242	0.999	6197	tags=42%, list=30%, signal=60%
WELCSH_BRCA1_TARGETS_UP	WELCSH_BRCA1_TARGETS_UP		194	0.296359	1.62966	0.0268714	0.14294	0.999	5655	tags=33%, list=28%, signal=45%
BOYLAN_MULTIPLE_MYELOMA_C_CLUSTER_DN	BOYLAN_MULTIPLE_MYELOMA_C_CLUSTER_DN		32	0.598432	1.62839	0.0101833	0.143904	0.999	3285	tags=47%, list=16%, signal=56%
KEGG_O_GLYCAN_BIOSYNTHESIS	KEGG_O_GLYCAN_BIOSYNTHESIS		30	0.636099	1.62818	0.00596422	0.143772	0.999	4281	tags=57%, list=21%, signal=72%
REACTOME_GRB2_SOS_PROVIDES_LINKAGE_TO_MAPK_SIGNALING_FOR_INTERGRINS_	REACTOME_GRB2_SOS_PROVIDES_LINKAGE_TO_MAPK_SIGNALING_FOR_INTERGRINS_		15	0.695257	1.62745	0.0257937	0.144259	0.999	2814	tags=47%, list=14%, signal=54%
PID_ANGIOPOIETIN_RECEPTOR_PATHWAY	PID_ANGIOPOIETIN_RECEPTOR_PATHWAY		50	0.476742	1.6272	0.0261044	0.144195	0.999	4268	tags=32%, list=21%, signal=40%
KEGG_DILATED_CARDIOMYOPATHY	KEGG_DILATED_CARDIOMYOPATHY		90	0.585004	1.62662	0.0019685	0.144552	0.999	3092	tags=39%, list=15%, signal=46%
HOSHIDA_LIVER_CANCER_SUBCLASS_S1	HOSHIDA_LIVER_CANCER_SUBCLASS_S1		228	0.484383	1.62534	0.0615385	0.14565	0.999	5284	tags=45%, list=26%, signal=60%
COWLING_MYCN_TARGETS	COWLING_MYCN_TARGETS		43	0.665298	1.62507	0.0119048	0.145611	0.999	3263	tags=56%, list=16%, signal=66%
REACTOME_SIGNALING_BY_EGFR_IN_CANCER	REACTOME_SIGNALING_BY_EGFR_IN_CANCER		105	0.345513	1.62492	0.023622	0.145428	0.999	5030	tags=31%, list=25%, signal=41%
FISCHER_DIRECT_P53_TARGETS_META_ANALYSIS	FISCHER_DIRECT_P53_TARGETS_META_ANALYSIS		295	0.381233	1.6243	0.00430108	0.145785	0.999	4389	tags=31%, list=21%, signal=39%
LEI_HOXC8_TARGETS_DN	LEI_HOXC8_TARGETS_DN		17	0.755801	1.62386	0.00584795	0.145895	0.999	3111	tags=65%, list=15%, signal=76%
STREICHER_LSM1_TARGETS_UP	STREICHER_LSM1_TARGETS_UP		44	0.48192	1.62308	0.00606061	0.146402	0.999	4590	tags=50%, list=22%, signal=64%
VERNELL_RETINOBLASTOMA_PATHWAY_DN	VERNELL_RETINOBLASTOMA_PATHWAY_DN		22	0.549547	1.62295	0.0219124	0.146196	0.999	5400	tags=55%, list=26%, signal=74%
TSAI_RESPONSE_TO_RADIATION_THERAPY	TSAI_RESPONSE_TO_RADIATION_THERAPY		32	0.653003	1.62211	0.0203252	0.146815	0.999	3217	tags=53%, list=16%, signal=63%
SCHRAETS_MLL_TARGETS_DN	SCHRAETS_MLL_TARGETS_DN		33	0.616101	1.62101	0.0141414	0.147771	0.999	2927	tags=42%, list=14%, signal=49%
REACTOME_MAPK_TARGETS_NUCLEAR_EVENTS_MEDIATED_BY_MAP_KINASES	REACTOME_MAPK_TARGETS_NUCLEAR_EVENTS_MEDIATED_BY_MAP_KINASES		30	0.458117	1.62071	0.0554455	0.147797	0.999	6109	tags=50%, list=30%, signal=71%
NABA_COLLAGENS	NABA_COLLAGENS		42	0.697199	1.62071	0.00808081	0.147474	0.999	1569	tags=57%, list=8%, signal=62%
WENDT_COHESIN_TARGETS_UP	WENDT_COHESIN_TARGETS_UP		29	0.449805	1.6205	0.0662651	0.147366	0.999	7342	tags=66%, list=36%, signal=102%
KEGG_FC_GAMMA_R_MEDIATED_PHAGOCYTOSIS	KEGG_FC_GAMMA_R_MEDIATED_PHAGOCYTOSIS		95	0.487616	1.61992	0.0433925	0.147615	0.999	5704	tags=44%, list=28%, signal=61%
VALK_AML_WITH_EVI1	VALK_AML_WITH_EVI1		23	0.577341	1.61981	0.0292398	0.147355	0.999	4754	tags=48%, list=23%, signal=62%
MAHADEVAN_IMATINIB_RESISTANCE_UP	MAHADEVAN_IMATINIB_RESISTANCE_UP		21	0.711264	1.61947	0.015748	0.147401	0.999	3846	tags=67%, list=19%, signal=82%
KYNG_DNA_DAMAGE_BY_GAMMA_AND_UV_RADIATION	KYNG_DNA_DAMAGE_BY_GAMMA_AND_UV_RADIATION		88	0.408701	1.61929	0.0133588	0.14728	0.999	4875	tags=38%, list=24%, signal=49%
AZARE_NEOPLASTIC_TRANSFORMATION_BY_STAT3_UP	AZARE_NEOPLASTIC_TRANSFORMATION_BY_STAT3_UP		120	0.546102	1.61896	0.0196464	0.147295	0.999	4430	tags=49%, list=22%, signal=62%
SIMBULAN_UV_RESPONSE_IMMORTALIZED_DN	SIMBULAN_UV_RESPONSE_IMMORTALIZED_DN		31	0.521863	1.6171	0.0324427	0.148957	0.999	3312	tags=45%, list=16%, signal=54%
BIOCARTA_TPO_PATHWAY	BIOCARTA_TPO_PATHWAY		24	0.542417	1.6167	0.0182556	0.149051	0.999	5777	tags=42%, list=28%, signal=58%
HUANG_DASATINIB_RESISTANCE_UP	HUANG_DASATINIB_RESISTANCE_UP		78	0.613468	1.61642	0.0247934	0.149045	0.999	3518	tags=45%, list=17%, signal=54%
CHEBOTAEV_GR_TARGETS_DN	CHEBOTAEV_GR_TARGETS_DN		117	0.58012	1.61524	0.00816326	0.150161	0.999	4284	tags=56%, list=21%, signal=70%
BRUNO_HEMATOPOIESIS	BRUNO_HEMATOPOIESIS		65	0.451694	1.61448	0.0157791	0.150723	0.999	4967	tags=46%, list=24%, signal=61%
OUILLETTE_CLL_13Q14_DELETION_DN	OUILLETTE_CLL_13Q14_DELETION_DN		56	0.450437	1.61358	0.00385356	0.151361	0.999	3547	tags=32%, list=17%, signal=39%
REACTOME_SIGNALING_BY_BMP	REACTOME_SIGNALING_BY_BMP		22	0.596484	1.61352	0.00990099	0.151135	0.999	7064	tags=68%, list=34%, signal=104%
NABA_ECM_REGULATORS	NABA_ECM_REGULATORS		230	0.539658	1.61229	0.00392157	0.152201	0.999	2409	tags=33%, list=12%, signal=38%
GARGALOVIC_RESPONSE_TO_OXIDIZED_PHOSPHOLIPIDS_BLACK_UP	GARGALOVIC_RESPONSE_TO_OXIDIZED_PHOSPHOLIPIDS_BLACK_UP		35	0.454368	1.61202	0.0392927	0.152204	0.999	6274	tags=46%, list=31%, signal=66%
BEGUM_TARGETS_OF_PAX3_FOXO1_FUSION_DN	BEGUM_TARGETS_OF_PAX3_FOXO1_FUSION_DN		45	0.586131	1.61185	0.028169	0.152114	0.999	2711	tags=40%, list=13%, signal=46%
TOMLINS_PROSTATE_CANCER_UP	TOMLINS_PROSTATE_CANCER_UP		40	0.385995	1.61163	0.0515873	0.152036	0.999	4924	tags=43%, list=24%, signal=56%
KEGG_SMALL_CELL_LUNG_CANCER	KEGG_SMALL_CELL_LUNG_CANCER		84	0.440685	1.61154	0.0196464	0.151803	0.999	4943	tags=42%, list=24%, signal=55%
JECHLINGER_EPITHELIAL_TO_MESENCHYMAL_TRANSITION_UP	JECHLINGER_EPITHELIAL_TO_MESENCHYMAL_TRANSITION_UP		71	0.621108	1.61099	0.0204918	0.152079	0.999	3030	tags=49%, list=15%, signal=58%
MURATA_VIRULENCE_OF_H_PILORI	MURATA_VIRULENCE_OF_H_PILORI		24	0.66809	1.61073	0.0214844	0.152074	0.999	3285	tags=50%, list=16%, signal=59%
PLASARI_TGFB1_SIGNALING_VIA_NFIC_1HR_DN	PLASARI_TGFB1_SIGNALING_VIA_NFIC_1HR_DN		105	0.503178	1.61057	0.00803213	0.15194	0.999	4846	tags=45%, list=24%, signal=58%
RUTELLA_RESPONSE_TO_HGF_UP	RUTELLA_RESPONSE_TO_HGF_UP		412	0.457888	1.60983	0.0413386	0.152384	0.999	4814	tags=38%, list=23%, signal=49%
NIELSEN_MALIGNAT_FIBROUS_HISTIOCYTOMA_UP	NIELSEN_MALIGNAT_FIBROUS_HISTIOCYTOMA_UP		18	0.774603	1.60945	0.00808081	0.152423	0.999	2669	tags=67%, list=13%, signal=77%
PANGAS_TUMOR_SUPPRESSION_BY_SMAD1_AND_SMAD5_UP	PANGAS_TUMOR_SUPPRESSION_BY_SMAD1_AND_SMAD5_UP		130	0.54776	1.60879	0.0143737	0.15279	0.999	4941	tags=57%, list=24%, signal=75%
SHEN_SMARCA2_TARGETS_UP	SHEN_SMARCA2_TARGETS_UP		413	0.350998	1.60864	0.109504	0.152675	0.999	7537	tags=49%, list=37%, signal=75%
LINDGREN_BLADDER_CANCER_CLUSTER_2A_DN	LINDGREN_BLADDER_CANCER_CLUSTER_2A_DN		139	0.417157	1.60687	0.0513834	0.154224	0.999	5036	tags=42%, list=25%, signal=56%
SERVITJA_ISLET_HNF1A_TARGETS_UP	SERVITJA_ISLET_HNF1A_TARGETS_UP		161	0.571863	1.60577	0.00833333	0.155191	0.999	3895	tags=47%, list=19%, signal=58%
DEBIASI_APOPTOSIS_BY_REOVIRUS_INFECTION_UP	DEBIASI_APOPTOSIS_BY_REOVIRUS_INFECTION_UP		306	0.379474	1.60358	0.0489362	0.157397	0.999	5617	tags=41%, list=27%, signal=55%
BILBAN_B_CLL_LPL_UP	BILBAN_B_CLL_LPL_UP		62	0.5146	1.60352	0.0216535	0.157122	0.999	5669	tags=50%, list=28%, signal=69%
CHIARADONNA_NEOPLASTIC_TRANSFORMATION_KRAS_UP	CHIARADONNA_NEOPLASTIC_TRANSFORMATION_KRAS_UP		124	0.458971	1.6032	0.0289575	0.157163	0.999	3060	tags=27%, list=15%, signal=31%
CUI_TCF21_TARGETS_DN	CUI_TCF21_TARGETS_DN		31	0.586969	1.60212	0.01222	0.157953	0.999	4295	tags=58%, list=21%, signal=73%
MILI_PSEUDOPODIA_HAPTOTAXIS_UP	MILI_PSEUDOPODIA_HAPTOTAXIS_UP		499	0.296711	1.60132	0.101365	0.158485	0.999	6186	tags=35%, list=30%, signal=49%
CHIANG_LIVER_CANCER_SUBCLASS_CTNNB1_DN	CHIANG_LIVER_CANCER_SUBCLASS_CTNNB1_DN		168	0.556535	1.60097	0.0116959	0.1586	0.999	2863	tags=37%, list=14%, signal=43%
CROMER_TUMORIGENESIS_UP	CROMER_TUMORIGENESIS_UP		63	0.638374	1.60079	0.00982318	0.158411	0.999	2197	tags=46%, list=11%, signal=51%
DAVICIONI_RHABDOMYOSARCOMA_PAX_FOXO1_FUSION_DN	DAVICIONI_RHABDOMYOSARCOMA_PAX_FOXO1_FUSION_DN		15	0.679884	1.59973	0.0233463	0.159309	0.999	2322	tags=40%, list=11%, signal=45%
REACTOME_INTEGRIN_ALPHAIIB_BETA3_SIGNALING	REACTOME_INTEGRIN_ALPHAIIB_BETA3_SIGNALING		27	0.546943	1.59897	0.0290135	0.159832	0.999	5675	tags=52%, list=28%, signal=72%
NAKAMURA_ADIPOGENESIS_LATE_UP	NAKAMURA_ADIPOGENESIS_LATE_UP		102	0.454996	1.59872	0.0428571	0.15977	0.999	4055	tags=34%, list=20%, signal=43%
TORCHIA_TARGETS_OF_EWSR1_FLI1_FUSION_UP	TORCHIA_TARGETS_OF_EWSR1_FLI1_FUSION_UP		266	0.421099	1.5986	0.0154739	0.159544	0.999	5039	tags=41%, list=25%, signal=53%
PID_NCADHERIN_PATHWAY	PID_NCADHERIN_PATHWAY		33	0.468075	1.59842	0.0414938	0.159401	0.999	7272	tags=58%, list=35%, signal=89%
REACTOME_PI_METABOLISM	REACTOME_PI_METABOLISM		47	0.420787	1.59829	0.0342742	0.159227	0.999	6138	tags=51%, list=30%, signal=73%
LUI_THYROID_CANCER_PAX8_PPARG_UP	LUI_THYROID_CANCER_PAX8_PPARG_UP		42	0.384969	1.59825	0.0173745	0.158931	0.999	7368	tags=50%, list=36%, signal=78%
LIU_SMARCA4_TARGETS	LIU_SMARCA4_TARGETS		61	0.551925	1.59585	0.0102249	0.16132	0.999	4116	tags=52%, list=20%, signal=65%
FRIDMAN_IMMORTALIZATION_DN	FRIDMAN_IMMORTALIZATION_DN		33	0.554992	1.59577	0.043222	0.161084	0.999	5483	tags=58%, list=27%, signal=78%
REACTOME_GLYCOSPHINGOLIPID_METABOLISM	REACTOME_GLYCOSPHINGOLIPID_METABOLISM		37	0.507086	1.59571	0.0204082	0.160831	0.999	3459	tags=35%, list=17%, signal=42%
KEGG_COLORECTAL_CANCER	KEGG_COLORECTAL_CANCER		62	0.387928	1.59562	0.0311284	0.160604	0.999	7235	tags=50%, list=35%, signal=77%
WANG_NEOPLASTIC_TRANSFORMATION_BY_CCND1_MYC	WANG_NEOPLASTIC_TRANSFORMATION_BY_CCND1_MYC		21	0.666368	1.59374	0.0141129	0.162503	0.999	2148	tags=38%, list=10%, signal=43%
MCCLUNG_COCAIN_REWARD_4WK	MCCLUNG_COCAIN_REWARD_4WK		75	0.458636	1.59293	0.012024	0.163113	0.999	3429	tags=25%, list=17%, signal=30%
CHANG_IMMORTALIZED_BY_HPV31_UP	CHANG_IMMORTALIZED_BY_HPV31_UP		79	0.445698	1.59291	0.01341	0.16282	0.999	3235	tags=29%, list=16%, signal=34%
TAKEDA_TARGETS_OF_NUP98_HOXA9_FUSION_6HR_UP	TAKEDA_TARGETS_OF_NUP98_HOXA9_FUSION_6HR_UP		81	0.612539	1.59227	0.002079	0.16323	0.999	4151	tags=52%, list=20%, signal=65%
BIOCARTA_MAPK_PATHWAY	BIOCARTA_MAPK_PATHWAY		86	0.331303	1.59054	0.0497018	0.164805	0.999	6564	tags=48%, list=32%, signal=70%
MARKEY_RB1_CHRONIC_LOF_UP	MARKEY_RB1_CHRONIC_LOF_UP		114	0.440626	1.5897	0.0232108	0.165485	0.999	2845	tags=25%, list=14%, signal=29%
LEE_CALORIE_RESTRICTION_NEOCORTEX_DN	LEE_CALORIE_RESTRICTION_NEOCORTEX_DN		87	0.378734	1.58952	0.00784314	0.165335	0.999	3052	tags=22%, list=15%, signal=26%
STEGER_ADIPOGENESIS_DN	STEGER_ADIPOGENESIS_DN		25	0.711229	1.58912	0.0268595	0.165507	0.999	1507	tags=56%, list=7%, signal=60%
DASU_IL6_SIGNALING_UP	DASU_IL6_SIGNALING_UP		58	0.523746	1.58902	0.0337972	0.165274	0.999	3514	tags=34%, list=17%, signal=41%
WESTON_VEGFA_TARGETS_12HR	WESTON_VEGFA_TARGETS_12HR		35	0.595214	1.58829	0.0337972	0.165828	0.999	2531	tags=37%, list=12%, signal=42%
KAMIKUBO_MYELOID_CEBPA_NETWORK	KAMIKUBO_MYELOID_CEBPA_NETWORK		28	0.665482	1.5881	0.0195312	0.165719	0.999	4885	tags=64%, list=24%, signal=84%
KYNG_DNA_DAMAGE_UP	KYNG_DNA_DAMAGE_UP		222	0.395014	1.5873	0.00787402	0.166271	0.999	5425	tags=37%, list=26%, signal=50%
NAKAYAMA_SOFT_TISSUE_TUMORS_PCA1_UP	NAKAYAMA_SOFT_TISSUE_TUMORS_PCA1_UP		69	0.722653	1.58713	0.0308285	0.1662	0.999	3202	tags=59%, list=16%, signal=70%
DAVIES_MULTIPLE_MYELOMA_VS_MGUS_DN	DAVIES_MULTIPLE_MYELOMA_VS_MGUS_DN		26	0.645307	1.58709	0.0313112	0.165922	0.999	5954	tags=77%, list=29%, signal=108%
LINDGREN_BLADDER_CANCER_WITH_LOH_IN_CHR9Q	LINDGREN_BLADDER_CANCER_WITH_LOH_IN_CHR9Q		113	0.363494	1.58696	0.0814664	0.165749	0.999	6620	tags=49%, list=32%, signal=71%
BIOCARTA_ARAP_PATHWAY	BIOCARTA_ARAP_PATHWAY		17	0.477111	1.58663	0.0608365	0.16577	0.999	3475	tags=29%, list=17%, signal=35%
KANG_IMMORTALIZED_BY_TERT_UP	KANG_IMMORTALIZED_BY_TERT_UP		89	0.517401	1.58651	0.0118343	0.165571	0.999	2543	tags=35%, list=12%, signal=40%
REACTOME_SEMA4D_IN_SEMAPHORIN_SIGNALING	REACTOME_SEMA4D_IN_SEMAPHORIN_SIGNALING		28	0.488692	1.58627	0.037422	0.165507	0.999	5153	tags=36%, list=25%, signal=48%
CHEN_ETV5_TARGETS_SERTOLI	CHEN_ETV5_TARGETS_SERTOLI		20	0.715514	1.58599	0.013834	0.165538	0.999	2677	tags=65%, list=13%, signal=75%
PID_TNF_PATHWAY	PID_TNF_PATHWAY		46	0.398689	1.58526	0.0611855	0.166019	1	5511	tags=46%, list=27%, signal=62%
KEGG_APOPTOSIS	KEGG_APOPTOSIS		87	0.450184	1.58469	0.0487805	0.166432	1	5530	tags=43%, list=27%, signal=58%
REACTOME_REGULATION_OF_SIGNALING_BY_CBL	REACTOME_REGULATION_OF_SIGNALING_BY_CBL		18	0.580577	1.58448	0.0552268	0.166333	1	8068	tags=78%, list=39%, signal=128%
HELLEBREKERS_SILENCED_DURING_TUMOR_ANGIOGENESIS	HELLEBREKERS_SILENCED_DURING_TUMOR_ANGIOGENESIS		79	0.564567	1.58368	0.00809717	0.167022	1	3332	tags=38%, list=16%, signal=45%
WAMUNYOKOLI_OVARIAN_CANCER_GRADES_1_2_UP	WAMUNYOKOLI_OVARIAN_CANCER_GRADES_1_2_UP		137	0.39479	1.58286	0.0331263	0.167592	1	4695	tags=35%, list=23%, signal=45%
SANA_TNF_SIGNALING_UP	SANA_TNF_SIGNALING_UP		80	0.62782	1.58242	0.0343434	0.167825	1	5510	tags=70%, list=27%, signal=95%
SNIJDERS_AMPLIFIED_IN_HEAD_AND_NECK_TUMORS	SNIJDERS_AMPLIFIED_IN_HEAD_AND_NECK_TUMORS		37	0.533202	1.58242	0.0250965	0.167505	1	3692	tags=35%, list=18%, signal=43%
KRASNOSELSKAYA_ILF3_TARGETS_UP	KRASNOSELSKAYA_ILF3_TARGETS_UP		37	0.668804	1.5824	0.0524194	0.167216	1	4620	tags=68%, list=23%, signal=87%
ZHENG_FOXP3_TARGETS_IN_T_LYMPHOCYTE_DN	ZHENG_FOXP3_TARGETS_IN_T_LYMPHOCYTE_DN		36	0.618251	1.58223	0.0180723	0.167075	1	4829	tags=67%, list=24%, signal=87%
AMIT_SERUM_RESPONSE_60_MCF10A	AMIT_SERUM_RESPONSE_60_MCF10A		57	0.530069	1.58216	0.046332	0.166841	1	4062	tags=39%, list=20%, signal=48%
REACTOME_L1CAM_INTERACTIONS	REACTOME_L1CAM_INTERACTIONS		84	0.489453	1.58214	0.0304878	0.166555	1	2921	tags=32%, list=14%, signal=37%
EPPERT_HSC_R	EPPERT_HSC_R		116	0.481448	1.5821	0.0337302	0.166275	1	4667	tags=47%, list=23%, signal=60%
GARGALOVIC_RESPONSE_TO_OXIDIZED_PHOSPHOLIPIDS_GREEN_UP	GARGALOVIC_RESPONSE_TO_OXIDIZED_PHOSPHOLIPIDS_GREEN_UP		23	0.557421	1.581	0.0420842	0.167173	1	3297	tags=35%, list=16%, signal=41%
BLALOCK_ALZHEIMERS_DISEASE_INCIPIENT_UP	BLALOCK_ALZHEIMERS_DISEASE_INCIPIENT_UP		385	0.335925	1.58055	0.0101626	0.167433	1	5146	tags=33%, list=25%, signal=43%
PID_MET_PATHWAY	PID_MET_PATHWAY		79	0.28808	1.58002	0.032197	0.167822	1	6632	tags=43%, list=32%, signal=63%
SMIRNOV_RESPONSE_TO_IR_6HR_UP	SMIRNOV_RESPONSE_TO_IR_6HR_UP		158	0.374615	1.57974	0.0229167	0.167884	1	5398	tags=37%, list=26%, signal=50%
MARTIN_INTERACT_WITH_HDAC	MARTIN_INTERACT_WITH_HDAC		43	0.377258	1.57965	0.0368098	0.167694	1	5969	tags=37%, list=29%, signal=52%
SANA_RESPONSE_TO_IFNG_DN	SANA_RESPONSE_TO_IFNG_DN		85	0.377014	1.57811	0.0673077	0.169174	1	2814	tags=19%, list=14%, signal=22%
DURAND_STROMA_NS_UP	DURAND_STROMA_NS_UP		160	0.466256	1.5779	0.00588235	0.169151	1	3901	tags=39%, list=19%, signal=48%
PID_AJDISS_2PATHWAY	PID_AJDISS_2PATHWAY		48	0.456814	1.57672	0.0218688	0.170236	1	6379	tags=46%, list=31%, signal=66%
LINDSTEDT_DENDRITIC_CELL_MATURATION_D	LINDSTEDT_DENDRITIC_CELL_MATURATION_D		65	0.538888	1.57626	0.0625	0.170445	1	4682	tags=49%, list=23%, signal=64%
PID_SYNDECAN_4_PATHWAY	PID_SYNDECAN_4_PATHWAY		32	0.553889	1.57593	0.016129	0.17053	1	1518	tags=28%, list=7%, signal=30%
SAMOLS_TARGETS_OF_KHSV_MIRNAS_DN	SAMOLS_TARGETS_OF_KHSV_MIRNAS_DN		59	0.476691	1.57535	0.0233918	0.170849	1	3271	tags=34%, list=16%, signal=40%
TIEN_INTESTINE_PROBIOTICS_6HR_DN	TIEN_INTESTINE_PROBIOTICS_6HR_DN		161	0.290539	1.57535	0.0413386	0.170536	1	6387	tags=36%, list=31%, signal=52%
BEIER_GLIOMA_STEM_CELL_DN	BEIER_GLIOMA_STEM_CELL_DN		57	0.431566	1.57475	0.026694	0.170919	1	3781	tags=30%, list=18%, signal=36%
PEDERSEN_TARGETS_OF_611CTF_ISOFORM_OF_ERBB2	PEDERSEN_TARGETS_OF_611CTF_ISOFORM_OF_ERBB2		76	0.540213	1.57461	0.0198807	0.17078	1	2927	tags=37%, list=14%, signal=43%
CLASPER_LYMPHATIC_VESSELS_DURING_METASTASIS_UP	CLASPER_LYMPHATIC_VESSELS_DURING_METASTASIS_UP		20	0.668201	1.57424	0.0101833	0.170945	1	3830	tags=55%, list=19%, signal=68%
GAVIN_FOXP3_TARGETS_CLUSTER_P7	GAVIN_FOXP3_TARGETS_CLUSTER_P7		87	0.535942	1.57404	0.00623701	0.170826	1	3888	tags=45%, list=19%, signal=55%
CHICAS_RB1_TARGETS_GROWING	CHICAS_RB1_TARGETS_GROWING		238	0.486419	1.57362	0.0419847	0.170983	1	2755	tags=27%, list=13%, signal=31%
MYLLYKANGAS_AMPLIFICATION_HOT_SPOT_17	MYLLYKANGAS_AMPLIFICATION_HOT_SPOT_17		19	0.562661	1.57356	0.0441767	0.170741	1	5364	tags=53%, list=26%, signal=71%
LA_MEN1_TARGETS	LA_MEN1_TARGETS		24	0.62013	1.57164	0.015748	0.172699	1	4163	tags=58%, list=20%, signal=73%
VERHAAK_AML_WITH_NPM1_MUTATED_UP	VERHAAK_AML_WITH_NPM1_MUTATED_UP		181	0.584544	1.57156	0.0273438	0.172456	1	3642	tags=47%, list=18%, signal=57%
ZWANG_EGF_PERSISTENTLY_DN	ZWANG_EGF_PERSISTENTLY_DN		55	0.408904	1.57118	0.0193424	0.172627	1	3083	tags=24%, list=15%, signal=28%
GAUSSMANN_MLL_AF4_FUSION_TARGETS_G_DN	GAUSSMANN_MLL_AF4_FUSION_TARGETS_G_DN		35	0.494601	1.57111	0.0143737	0.172388	1	2738	tags=31%, list=13%, signal=36%
WINTER_HYPOXIA_METAGENE	WINTER_HYPOXIA_METAGENE		237	0.414021	1.57102	0.0275049	0.172162	1	4838	tags=35%, list=24%, signal=45%
CHIARADONNA_NEOPLASTIC_TRANSFORMATION_KRAS_CDC25_DN	CHIARADONNA_NEOPLASTIC_TRANSFORMATION_KRAS_CDC25_DN		51	0.632289	1.57084	0.036	0.17209	1	2459	tags=47%, list=12%, signal=53%
LIN_NPAS4_TARGETS_UP	LIN_NPAS4_TARGETS_UP		155	0.382721	1.57026	0.0144033	0.172481	1	4759	tags=28%, list=23%, signal=36%
KEGG_AXON_GUIDANCE	KEGG_AXON_GUIDANCE		129	0.468796	1.56822	0.0275591	0.174688	1	3001	tags=22%, list=15%, signal=26%
XU_HGF_SIGNALING_NOT_VIA_AKT1_6HR	XU_HGF_SIGNALING_NOT_VIA_AKT1_6HR		26	0.537321	1.56819	0.0454545	0.174405	1	1323	tags=19%, list=6%, signal=21%
GALLUZZI_PREVENT_MITOCHONDIAL_PERMEABILIZATION	GALLUZZI_PREVENT_MITOCHONDIAL_PERMEABILIZATION		22	0.452809	1.56775	0.0580913	0.174635	1	2090	tags=14%, list=10%, signal=15%
KAAB_HEART_ATRIUM_VS_VENTRICLE_UP	KAAB_HEART_ATRIUM_VS_VENTRICLE_UP		247	0.470543	1.56723	0.0289017	0.174954	1	3492	tags=33%, list=17%, signal=40%
HOOI_ST7_TARGETS_UP	HOOI_ST7_TARGETS_UP		87	0.50978	1.56711	0.0162602	0.174775	1	3879	tags=39%, list=19%, signal=48%
NABA_PROTEOGLYCANS	NABA_PROTEOGLYCANS		35	0.663949	1.56641	0.0196464	0.175364	1	2383	tags=54%, list=12%, signal=61%
RUTELLA_RESPONSE_TO_HGF_VS_CSF2RB_AND_IL4_UP	RUTELLA_RESPONSE_TO_HGF_VS_CSF2RB_AND_IL4_UP		401	0.472193	1.56622	0.0543689	0.175308	1	4814	tags=41%, list=23%, signal=53%
KEGG_MELANOMA	KEGG_MELANOMA		71	0.509209	1.56609	0.0255403	0.175144	1	3233	tags=32%, list=16%, signal=38%
TSUNODA_CISPLATIN_RESISTANCE_UP	TSUNODA_CISPLATIN_RESISTANCE_UP		15	0.682416	1.566	0.016129	0.174952	1	3055	tags=53%, list=15%, signal=63%
SCHAEFFER_PROSTATE_DEVELOPMENT_12HR_UP	SCHAEFFER_PROSTATE_DEVELOPMENT_12HR_UP		115	0.534761	1.56522	0.0244898	0.175557	1	3756	tags=44%, list=18%, signal=54%
REACTOME_PHOSPHOLIPID_METABOLISM	REACTOME_PHOSPHOLIPID_METABOLISM		190	0.353539	1.56497	0.00965251	0.175569	1	5957	tags=39%, list=29%, signal=55%
TOOKER_GEMCITABINE_RESISTANCE_DN	TOOKER_GEMCITABINE_RESISTANCE_DN		122	0.313748	1.56497	0.0441767	0.175259	1	4791	tags=28%, list=23%, signal=36%
RUTELLA_RESPONSE_TO_CSF2RB_AND_IL4_UP	RUTELLA_RESPONSE_TO_CSF2RB_AND_IL4_UP		332	0.412309	1.56483	0.0535714	0.1751	1	5183	tags=36%, list=25%, signal=47%
PID_INTEGRIN2_PATHWAY	PID_INTEGRIN2_PATHWAY		29	0.685547	1.56311	0.0330739	0.176902	1	2672	tags=55%, list=13%, signal=63%
VALK_AML_CLUSTER_5	VALK_AML_CLUSTER_5		33	0.713986	1.56218	0.0348162	0.177677	1	3866	tags=67%, list=19%, signal=82%
VALK_AML_CLUSTER_15	VALK_AML_CLUSTER_15		30	0.552745	1.56163	0.0270833	0.177957	1	4538	tags=53%, list=22%, signal=68%
ZWANG_CLASS_3_TRANSIENTLY_INDUCED_BY_EGF	ZWANG_CLASS_3_TRANSIENTLY_INDUCED_BY_EGF		215	0.462453	1.56152	0.061144	0.177805	1	5658	tags=47%, list=28%, signal=64%
IZADPANAH_STEM_CELL_ADIPOSE_VS_BONE_UP	IZADPANAH_STEM_CELL_ADIPOSE_VS_BONE_UP		121	0.479006	1.56146	0.035503	0.177573	1	3117	tags=30%, list=15%, signal=35%
WEIGEL_OXIDATIVE_STRESS_BY_TBH_AND_H2O2	WEIGEL_OXIDATIVE_STRESS_BY_TBH_AND_H2O2		34	0.441762	1.56129	0.0555556	0.177444	1	3305	tags=32%, list=16%, signal=39%
ZHANG_TLX_TARGETS_60HR_UP	ZHANG_TLX_TARGETS_60HR_UP		292	0.402456	1.5588	0.0239521	0.180358	1	5075	tags=39%, list=25%, signal=51%
CERVERA_SDHB_TARGETS_2	CERVERA_SDHB_TARGETS_2		111	0.526337	1.55859	0.00399202	0.180286	1	2928	tags=38%, list=14%, signal=44%
IVANOVA_HEMATOPOIESIS_MATURE_CELL	IVANOVA_HEMATOPOIESIS_MATURE_CELL		284	0.340092	1.55836	0.0139165	0.180214	1	4847	tags=29%, list=24%, signal=37%
NIELSEN_GIST_VS_SYNOVIAL_SARCOMA_UP	NIELSEN_GIST_VS_SYNOVIAL_SARCOMA_UP		18	0.691356	1.55823	0.0238095	0.180059	1	1237	tags=44%, list=6%, signal=47%
JAZAERI_BREAST_CANCER_BRCA1_VS_BRCA2_DN	JAZAERI_BREAST_CANCER_BRCA1_VS_BRCA2_DN		40	0.513904	1.5574	0.0181087	0.180734	1	2342	tags=33%, list=11%, signal=37%
ROSS_ACUTE_MYELOID_LEUKEMIA_CBF	ROSS_ACUTE_MYELOID_LEUKEMIA_CBF		78	0.486564	1.55629	0.0181087	0.181754	1	2103	tags=26%, list=10%, signal=28%
MIKKELSEN_NPC_ICP_WITH_H3K4ME3	MIKKELSEN_NPC_ICP_WITH_H3K4ME3		436	0.3967	1.55415	0.0141414	0.184026	1	4176	tags=31%, list=20%, signal=39%
JIANG_TIP30_TARGETS_UP	JIANG_TIP30_TARGETS_UP		46	0.458492	1.55391	0.0421456	0.184021	1	2407	tags=24%, list=12%, signal=27%
VANHARANTA_UTERINE_FIBROID_WITH_7Q_DELETION_DN	VANHARANTA_UTERINE_FIBROID_WITH_7Q_DELETION_DN		35	0.39154	1.55263	0.0705882	0.185387	1	5316	tags=43%, list=26%, signal=58%
PEDERSEN_METASTASIS_BY_ERBB2_ISOFORM_3	PEDERSEN_METASTASIS_BY_ERBB2_ISOFORM_3		17	0.620662	1.55177	0.0348837	0.186148	1	4935	tags=65%, list=24%, signal=85%
SENGUPTA_NASOPHARYNGEAL_CARCINOMA_WITH_LMP1_UP	SENGUPTA_NASOPHARYNGEAL_CARCINOMA_WITH_LMP1_UP		390	0.435101	1.55169	0.0123711	0.185929	1	3297	tags=28%, list=16%, signal=33%
WESTON_VEGFA_TARGETS	WESTON_VEGFA_TARGETS		108	0.503249	1.55119	0.0321285	0.186187	1	3638	tags=37%, list=18%, signal=45%
FUJII_YBX1_TARGETS_UP	FUJII_YBX1_TARGETS_UP		42	0.550916	1.55037	0.0178218	0.186928	1	4394	tags=48%, list=21%, signal=60%
PID_ERBB1_INTERNALIZATION_PATHWAY	PID_ERBB1_INTERNALIZATION_PATHWAY		40	0.371986	1.55016	0.0449219	0.186889	1	8055	tags=60%, list=39%, signal=99%
BIOCARTA_HER2_PATHWAY	BIOCARTA_HER2_PATHWAY		22	0.542746	1.54939	0.0402414	0.187692	1	2602	tags=23%, list=13%, signal=26%
PID_BETA_CATENIN_NUC_PATHWAY	PID_BETA_CATENIN_NUC_PATHWAY		79	0.448678	1.54819	0.0138614	0.188869	1	3285	tags=30%, list=16%, signal=36%
BERENJENO_TRANSFORMED_BY_RHOA_FOREVER_UP	BERENJENO_TRANSFORMED_BY_RHOA_FOREVER_UP		19	0.650768	1.5477	0.0331384	0.189172	1	2476	tags=37%, list=12%, signal=42%
REACTOME_GOLGI_ASSOCIATED_VESICLE_BIOGENESIS	REACTOME_GOLGI_ASSOCIATED_VESICLE_BIOGENESIS		52	0.314609	1.54752	0.0800781	0.189107	1	6302	tags=44%, list=31%, signal=64%
OZANNE_AP1_TARGETS_UP	OZANNE_AP1_TARGETS_UP		17	0.641505	1.54707	0.0263692	0.189358	1	3116	tags=35%, list=15%, signal=42%
PEDERSEN_METASTASIS_BY_ERBB2_ISOFORM_7	PEDERSEN_METASTASIS_BY_ERBB2_ISOFORM_7		385	0.356338	1.5467	0.00972763	0.189517	1	4176	tags=31%, list=20%, signal=39%
VART_KSHV_INFECTION_ANGIOGENIC_MARKERS_UP	VART_KSHV_INFECTION_ANGIOGENIC_MARKERS_UP		164	0.535409	1.54599	0.0217822	0.189992	1	2652	tags=37%, list=13%, signal=42%
KEGG_PATHWAYS_IN_CANCER	KEGG_PATHWAYS_IN_CANCER		324	0.414338	1.54542	0.0218688	0.190348	1	4943	tags=38%, list=24%, signal=49%
CROONQUIST_STROMAL_STIMULATION_UP	CROONQUIST_STROMAL_STIMULATION_UP		57	0.579086	1.5451	0.0386179	0.190445	1	3111	tags=40%, list=15%, signal=47%
TERAO_AOX4_TARGETS_HG_UP	TERAO_AOX4_TARGETS_HG_UP		26	0.411125	1.54352	0.0914634	0.192145	1	7122	tags=54%, list=35%, signal=82%
REACTOME_P130CAS_LINKAGE_TO_MAPK_SIGNALING_FOR_INTEGRINS	REACTOME_P130CAS_LINKAGE_TO_MAPK_SIGNALING_FOR_INTEGRINS		15	0.658199	1.5431	0.0529412	0.19234	1	2814	tags=47%, list=14%, signal=54%
BIOCARTA_RARRXR_PATHWAY	BIOCARTA_RARRXR_PATHWAY		15	0.508103	1.54257	0.0612245	0.192737	1	3837	tags=33%, list=19%, signal=41%
HENDRICKS_SMARCA4_TARGETS_UP	HENDRICKS_SMARCA4_TARGETS_UP		56	0.519297	1.54138	0.0499002	0.193843	1	4872	tags=48%, list=24%, signal=63%
BIOCARTA_NTHI_PATHWAY	BIOCARTA_NTHI_PATHWAY		24	0.52244	1.54054	0.0470588	0.194641	1	7139	tags=71%, list=35%, signal=109%
HAN_SATB1_TARGETS_UP	HAN_SATB1_TARGETS_UP		384	0.400925	1.53939	0.0181087	0.195836	1	3753	tags=28%, list=18%, signal=34%
ST_G_ALPHA_S_PATHWAY	ST_G_ALPHA_S_PATHWAY		16	0.559029	1.53903	0.0412371	0.195962	1	6564	tags=56%, list=32%, signal=83%
NAKAMURA_CANCER_MICROENVIRONMENT_UP	NAKAMURA_CANCER_MICROENVIRONMENT_UP		25	0.575219	1.53851	0.0260521	0.196309	1	1651	tags=28%, list=8%, signal=30%
MULLIGHAN_NPM1_MUTATED_SIGNATURE_2_UP	MULLIGHAN_NPM1_MUTATED_SIGNATURE_2_UP		132	0.363824	1.53764	0.0176817	0.197105	1	4183	tags=22%, list=20%, signal=27%
WANG_MLL_TARGETS	WANG_MLL_TARGETS		280	0.549933	1.53694	0.0205339	0.197692	1	2826	tags=41%, list=14%, signal=47%
HOELZEL_NF1_TARGETS_UP	HOELZEL_NF1_TARGETS_UP		134	0.533373	1.53674	0.0163934	0.197606	1	3257	tags=47%, list=16%, signal=56%
BIOCARTA_CALCINEURIN_PATHWAY	BIOCARTA_CALCINEURIN_PATHWAY		18	0.54737	1.53655	0.0527344	0.197538	1	6844	tags=61%, list=33%, signal=92%
WAMUNYOKOLI_OVARIAN_CANCER_GRADES_1_2_DN	WAMUNYOKOLI_OVARIAN_CANCER_GRADES_1_2_DN		63	0.543939	1.53652	0.0568627	0.197266	1	5104	tags=56%, list=25%, signal=74%
GROSS_HYPOXIA_VIA_HIF1A_DN	GROSS_HYPOXIA_VIA_HIF1A_DN		110	0.409017	1.53648	0.04	0.196993	1	3112	tags=26%, list=15%, signal=31%
ABDELMOHSEN_ELAVL4_TARGETS	ABDELMOHSEN_ELAVL4_TARGETS		16	0.558426	1.53597	0.0657084	0.197294	1	5445	tags=56%, list=27%, signal=77%
PID_ECADHERIN_KERATINOCYTE_PATHWAY	PID_ECADHERIN_KERATINOCYTE_PATHWAY		21	0.47517	1.53485	0.0658683	0.198428	1	8068	tags=57%, list=39%, signal=94%
RODWELL_AGING_KIDNEY_UP	RODWELL_AGING_KIDNEY_UP		454	0.496391	1.53391	0.0704501	0.199284	1	4056	tags=41%, list=20%, signal=50%
FRASOR_RESPONSE_TO_ESTRADIOL_DN	FRASOR_RESPONSE_TO_ESTRADIOL_DN		82	0.475145	1.53365	0.0298211	0.199332	1	5285	tags=45%, list=26%, signal=61%
KEGG_ENDOCYTOSIS	KEGG_ENDOCYTOSIS		174	0.322153	1.53313	0.0239521	0.19975	1	5423	tags=33%, list=26%, signal=45%
YAGI_AML_FAB_MARKERS	YAGI_AML_FAB_MARKERS		190	0.416268	1.53271	0.0234375	0.199994	1	5144	tags=45%, list=25%, signal=59%
PID_GLYPICAN_1PATHWAY	PID_GLYPICAN_1PATHWAY		27	0.628235	1.53238	0.0255906	0.200074	1	2992	tags=41%, list=15%, signal=48%
REACTOME_JNK_C_JUN_KINASES_PHOSPHORYLATION_AND_ACTIVATION_MEDIATED_BY_ACTIVATED_HUMAN_TAK1	REACTOME_JNK_C_JUN_KINASES_PHOSPHORYLATION_AND_ACTIVATION_MEDIATED_BY_ACTIVATED_HUMAN_TAK1		16	0.48157	1.53223	0.0567951	0.199932	1	6496	tags=63%, list=32%, signal=91%
GENTILE_UV_RESPONSE_CLUSTER_D9	GENTILE_UV_RESPONSE_CLUSTER_D9		24	0.439212	1.53153	0.0437376	0.200469	1	3934	tags=33%, list=19%, signal=41%
EBAUER_TARGETS_OF_PAX3_FOXO1_FUSION_DN	EBAUER_TARGETS_OF_PAX3_FOXO1_FUSION_DN		47	0.487701	1.53076	0.0204082	0.201201	1	4434	tags=45%, list=22%, signal=57%
CHIARADONNA_NEOPLASTIC_TRANSFORMATION_KRAS_CDC25_UP	CHIARADONNA_NEOPLASTIC_TRANSFORMATION_KRAS_CDC25_UP		56	0.486439	1.5306	0.0533597	0.201081	1	3489	tags=34%, list=17%, signal=41%
SIMBULAN_UV_RESPONSE_NORMAL_DN	SIMBULAN_UV_RESPONSE_NORMAL_DN		32	0.529844	1.52987	0.054326	0.201784	1	2532	tags=25%, list=12%, signal=28%
MOROSETTI_FACIOSCAPULOHUMERAL_MUSCULAR_DISTROPHY_UP	MOROSETTI_FACIOSCAPULOHUMERAL_MUSCULAR_DISTROPHY_UP		20	0.70151	1.52951	0.0303644	0.201993	1	1125	tags=40%, list=5%, signal=42%
FRIDMAN_SENESCENCE_UP	FRIDMAN_SENESCENCE_UP		77	0.437495	1.5295	0.0626223	0.201685	1	3941	tags=34%, list=19%, signal=42%
PID_ECADHERIN_STABILIZATION_PATHWAY	PID_ECADHERIN_STABILIZATION_PATHWAY		41	0.458419	1.52935	0.0645161	0.201592	1	5425	tags=44%, list=26%, signal=60%
AMIT_SERUM_RESPONSE_240_MCF10A	AMIT_SERUM_RESPONSE_240_MCF10A		57	0.508573	1.52931	0.0452756	0.201301	1	3398	tags=35%, list=17%, signal=42%
KAYO_CALORIE_RESTRICTION_MUSCLE_UP	KAYO_CALORIE_RESTRICTION_MUSCLE_UP		95	0.472142	1.52879	0.0457256	0.201697	1	2484	tags=27%, list=12%, signal=31%
BROWNE_HCMV_INFECTION_1HR_UP	BROWNE_HCMV_INFECTION_1HR_UP		60	0.515362	1.5285	0.0135659	0.201767	1	3186	tags=37%, list=16%, signal=43%
REACTOME_TRANSCRIPTIONAL_ACTIVITY_OF_SMAD2_SMAD3_SMAD4_HETEROTRIMER	REACTOME_TRANSCRIPTIONAL_ACTIVITY_OF_SMAD2_SMAD3_SMAD4_HETEROTRIMER		36	0.388571	1.52836	0.0921569	0.201602	1	5892	tags=39%, list=29%, signal=54%
KEGG_SPHINGOLIPID_METABOLISM	KEGG_SPHINGOLIPID_METABOLISM		39	0.46623	1.52755	0.0261569	0.2024	1	4225	tags=38%, list=21%, signal=48%
LEE_INTRATHYMIC_T_PROGENITOR	LEE_INTRATHYMIC_T_PROGENITOR		21	0.629453	1.52705	0.0164271	0.202686	1	4075	tags=48%, list=20%, signal=59%
NIELSEN_LEIOMYOSARCOMA_CNN1_DN	NIELSEN_LEIOMYOSARCOMA_CNN1_DN		19	0.664308	1.52674	0.0419162	0.202827	1	4176	tags=53%, list=20%, signal=66%
SCHOEN_NFKB_SIGNALING	SCHOEN_NFKB_SIGNALING		34	0.644541	1.52671	0.0285714	0.202533	1	3237	tags=44%, list=16%, signal=52%
DING_LUNG_CANCER_BY_MUTATION_RATE	DING_LUNG_CANCER_BY_MUTATION_RATE		20	0.621963	1.52665	0.0482897	0.202289	1	3106	tags=50%, list=15%, signal=59%
JI_METASTASIS_REPRESSED_BY_STK11	JI_METASTASIS_REPRESSED_BY_STK11		27	0.599372	1.52653	0.0355731	0.202109	1	3319	tags=59%, list=16%, signal=71%
LIU_VAV3_PROSTATE_CARCINOGENESIS_UP	LIU_VAV3_PROSTATE_CARCINOGENESIS_UP		86	0.568722	1.52608	0.0389105	0.202405	1	3343	tags=44%, list=16%, signal=53%
PHONG_TNF_RESPONSE_VIA_P38_PARTIAL	PHONG_TNF_RESPONSE_VIA_P38_PARTIAL		159	0.473782	1.5256	0.0514851	0.202719	1	4171	tags=36%, list=20%, signal=45%
MACAEVA_PBMC_RESPONSE_TO_IR	MACAEVA_PBMC_RESPONSE_TO_IR		100	0.398349	1.52507	0.0343434	0.203084	1	4076	tags=27%, list=20%, signal=34%
SENESE_HDAC2_TARGETS_DN	SENESE_HDAC2_TARGETS_DN		123	0.518379	1.52496	0.0423387	0.202902	1	2379	tags=29%, list=12%, signal=33%
LU_AGING_BRAIN_UP	LU_AGING_BRAIN_UP		258	0.399094	1.52469	0.0529412	0.202868	1	5759	tags=46%, list=28%, signal=63%
JIANG_HYPOXIA_NORMAL	JIANG_HYPOXIA_NORMAL		304	0.272233	1.52337	0.0339321	0.204232	1	5147	tags=27%, list=25%, signal=35%
HUANG_FOXA2_TARGETS_DN	HUANG_FOXA2_TARGETS_DN		36	0.596676	1.52305	0.0576541	0.204302	1	4314	tags=56%, list=21%, signal=70%
CROMER_METASTASIS_UP	CROMER_METASTASIS_UP		78	0.322659	1.52283	0.0448598	0.204286	1	5204	tags=29%, list=25%, signal=39%
HASLINGER_B_CLL_WITH_CHROMOSOME_12_TRISOMY	HASLINGER_B_CLL_WITH_CHROMOSOME_12_TRISOMY		23	0.469936	1.52275	0.0690335	0.204103	1	4341	tags=39%, list=21%, signal=50%
PARENT_MTOR_SIGNALING_DN	PARENT_MTOR_SIGNALING_DN		45	0.528397	1.52204	0.0164271	0.204693	1	3105	tags=38%, list=15%, signal=44%
TAKEDA_TARGETS_OF_NUP98_HOXA9_FUSION_8D_DN	TAKEDA_TARGETS_OF_NUP98_HOXA9_FUSION_8D_DN		197	0.566108	1.5212	0.0259481	0.205495	1	4595	tags=51%, list=22%, signal=65%
PAPASPYRIDONOS_UNSTABLE_ATEROSCLEROTIC_PLAQUE_UP	PAPASPYRIDONOS_UNSTABLE_ATEROSCLEROTIC_PLAQUE_UP		51	0.56826	1.5204	0.0679612	0.206227	1	5555	tags=53%, list=27%, signal=72%
YAGI_AML_WITH_T_9_11_TRANSLOCATION	YAGI_AML_WITH_T_9_11_TRANSLOCATION		128	0.35304	1.5193	0.0263692	0.207297	1	4477	tags=27%, list=22%, signal=35%
ELVIDGE_HYPOXIA_BY_DMOG_UP	ELVIDGE_HYPOXIA_BY_DMOG_UP		127	0.477596	1.51804	0.0607287	0.208693	1	4838	tags=37%, list=24%, signal=48%
PID_LYSOPHOSPHOLIPID_PATHWAY	PID_LYSOPHOSPHOLIPID_PATHWAY		66	0.441032	1.51699	0.041502	0.209831	1	5597	tags=42%, list=27%, signal=58%
BIOCARTA_CREB_PATHWAY	BIOCARTA_CREB_PATHWAY		27	0.476364	1.51615	0.0420842	0.210718	1	5850	tags=52%, list=29%, signal=72%
SETLUR_PROSTATE_CANCER_TMPRSS2_ERG_FUSION_UP	SETLUR_PROSTATE_CANCER_TMPRSS2_ERG_FUSION_UP		66	0.371914	1.5161	0.0245747	0.210446	1	3477	tags=29%, list=17%, signal=35%
WILLERT_WNT_SIGNALING	WILLERT_WNT_SIGNALING		22	0.501688	1.51609	0.0561122	0.21014	1	3531	tags=32%, list=17%, signal=38%
HUMMERICH_SKIN_CANCER_PROGRESSION_UP	HUMMERICH_SKIN_CANCER_PROGRESSION_UP		87	0.465786	1.51604	0.0544747	0.209875	1	3222	tags=29%, list=16%, signal=34%
LINDSTEDT_DENDRITIC_CELL_MATURATION_C	LINDSTEDT_DENDRITIC_CELL_MATURATION_C		67	0.486579	1.51571	0.0508806	0.209967	1	5465	tags=51%, list=27%, signal=69%
HAHTOLA_MYCOSIS_FUNGOIDES_SKIN_UP	HAHTOLA_MYCOSIS_FUNGOIDES_SKIN_UP		171	0.348926	1.5157	0.0998043	0.209656	1	3959	tags=26%, list=19%, signal=32%
IWANAGA_CARCINOGENESIS_BY_KRAS_PTEN_DN	IWANAGA_CARCINOGENESIS_BY_KRAS_PTEN_DN		344	0.401749	1.51487	0.0249042	0.210368	1	3363	tags=28%, list=16%, signal=34%
SIG_CHEMOTAXIS	SIG_CHEMOTAXIS		45	0.445591	1.51081	0.0725806	0.215537	1	5552	tags=40%, list=27%, signal=55%
PID_RAC1_PATHWAY	PID_RAC1_PATHWAY		53	0.368136	1.51019	0.0665399	0.215947	1	6770	tags=47%, list=33%, signal=70%
DORSEY_GAB2_TARGETS	DORSEY_GAB2_TARGETS		31	0.560354	1.50994	0.0251938	0.215974	1	1926	tags=32%, list=9%, signal=36%
REACTOME_ASPARAGINE_N_LINKED_GLYCOSYLATION	REACTOME_ASPARAGINE_N_LINKED_GLYCOSYLATION		80	0.325461	1.50981	0.0736434	0.215847	1	5926	tags=36%, list=29%, signal=51%
BROWNE_HCMV_INFECTION_12HR_UP	BROWNE_HCMV_INFECTION_12HR_UP		108	0.379378	1.50969	0.0496894	0.215673	1	5124	tags=36%, list=25%, signal=48%
LEIN_CHOROID_PLEXUS_MARKERS	LEIN_CHOROID_PLEXUS_MARKERS		102	0.479342	1.50957	0.0160966	0.215569	1	3453	tags=34%, list=17%, signal=41%
BROWNE_HCMV_INFECTION_14HR_DN	BROWNE_HCMV_INFECTION_14HR_DN		293	0.378922	1.50931	0.0299401	0.215574	1	4394	tags=32%, list=21%, signal=40%
KORKOLA_YOLK_SAC_TUMOR	KORKOLA_YOLK_SAC_TUMOR		59	0.551683	1.50891	0.0182556	0.215756	1	2481	tags=39%, list=12%, signal=44%
DACOSTA_LOW_DOSE_UV_RESPONSE_VIA_ERCC3_XPCS_UP	DACOSTA_LOW_DOSE_UV_RESPONSE_VIA_ERCC3_XPCS_UP		18	0.6057	1.50775	0.0339703	0.217043	1	5396	tags=61%, list=26%, signal=83%
ST_ADRENERGIC	ST_ADRENERGIC		36	0.505831	1.50733	0.031185	0.217335	1	5874	tags=50%, list=29%, signal=70%
KEGG_ENDOMETRIAL_CANCER	KEGG_ENDOMETRIAL_CANCER		52	0.370762	1.50705	0.0486381	0.217411	1	7235	tags=52%, list=35%, signal=80%
REACTOME_ANTIGEN_PRESENTATION_FOLDING_ASSEMBLY_AND_PEPTIDE_LOADING_OF_CLASS_I_MHC	REACTOME_ANTIGEN_PRESENTATION_FOLDING_ASSEMBLY_AND_PEPTIDE_LOADING_OF_CLASS_I_MHC		15	0.536077	1.50672	0.0959184	0.217548	1	5610	tags=47%, list=27%, signal=64%
LIAN_NEUTROPHIL_GRANULE_CONSTITUENTS	LIAN_NEUTROPHIL_GRANULE_CONSTITUENTS		25	0.613978	1.50656	0.0455446	0.21749	1	4304	tags=48%, list=21%, signal=61%
PID_FGF_PATHWAY	PID_FGF_PATHWAY		55	0.479124	1.50493	0.0438931	0.219485	1	4664	tags=40%, list=23%, signal=52%
BROCKE_APOPTOSIS_REVERSED_BY_IL6	BROCKE_APOPTOSIS_REVERSED_BY_IL6		142	0.424226	1.50472	0.101796	0.219471	1	5945	tags=46%, list=29%, signal=65%
TAKEDA_TARGETS_OF_NUP98_HOXA9_FUSION_3D_UP	TAKEDA_TARGETS_OF_NUP98_HOXA9_FUSION_3D_UP		174	0.528053	1.50441	0.048	0.219549	1	4196	tags=50%, list=20%, signal=62%
SENGUPTA_NASOPHARYNGEAL_CARCINOMA_UP	SENGUPTA_NASOPHARYNGEAL_CARCINOMA_UP		283	0.480057	1.50432	0.0941176	0.219354	1	3868	tags=31%, list=19%, signal=38%
DACOSTA_ERCC3_ALLELE_XPCS_VS_TTD_DN	DACOSTA_ERCC3_ALLELE_XPCS_VS_TTD_DN		36	0.60953	1.50424	0.0412371	0.21913	1	3298	tags=44%, list=16%, signal=53%
SCHAEFFER_PROSTATE_DEVELOPMENT_6HR_UP	SCHAEFFER_PROSTATE_DEVELOPMENT_6HR_UP		173	0.403802	1.50388	0.0482897	0.219351	1	4666	tags=35%, list=23%, signal=45%
IWANAGA_CARCINOGENESIS_BY_KRAS_UP	IWANAGA_CARCINOGENESIS_BY_KRAS_UP		167	0.371512	1.50375	0.00795229	0.219195	1	3107	tags=27%, list=15%, signal=32%
REACTOME_SIGNALLING_BY_NGF	REACTOME_SIGNALLING_BY_NGF		212	0.315995	1.50373	0.0419162	0.2189	1	6609	tags=44%, list=32%, signal=64%
MISHRA_CARCINOMA_ASSOCIATED_FIBROBLAST_DN	MISHRA_CARCINOMA_ASSOCIATED_FIBROBLAST_DN		24	0.559478	1.50373	0.0556701	0.218588	1	1914	tags=25%, list=9%, signal=28%
ELVIDGE_HYPOXIA_UP	ELVIDGE_HYPOXIA_UP		168	0.447516	1.50367	0.0610998	0.218342	1	4973	tags=38%, list=24%, signal=49%
LIU_PROSTATE_CANCER_DN	LIU_PROSTATE_CANCER_DN		466	0.519238	1.50312	0.0515873	0.218763	1	3285	tags=40%, list=16%, signal=47%
MASRI_RESISTANCE_TO_TAMOXIFEN_AND_AROMATASE_INHIBITORS_DN	MASRI_RESISTANCE_TO_TAMOXIFEN_AND_AROMATASE_INHIBITORS_DN		19	0.684716	1.5031	0.0365112	0.218469	1	2796	tags=58%, list=14%, signal=67%
ZHENG_IL22_SIGNALING_DN	ZHENG_IL22_SIGNALING_DN		42	0.51794	1.50283	0.0342612	0.218473	1	3481	tags=29%, list=17%, signal=34%
SIMBULAN_PARP1_TARGETS_UP	SIMBULAN_PARP1_TARGETS_UP		31	0.617177	1.5023	0.068	0.218897	1	3670	tags=42%, list=18%, signal=51%
BIOCARTA_CDC42RAC_PATHWAY	BIOCARTA_CDC42RAC_PATHWAY		16	0.463723	1.50204	0.0625	0.218968	1	5552	tags=44%, list=27%, signal=60%
BIOCARTA_BCELLSURVIVAL_PATHWAY	BIOCARTA_BCELLSURVIVAL_PATHWAY		16	0.46905	1.50152	0.0743494	0.219346	1	5445	tags=44%, list=27%, signal=60%
HOEBEKE_LYMPHOID_STEM_CELL_UP	HOEBEKE_LYMPHOID_STEM_CELL_UP		92	0.477485	1.50144	0.0628803	0.219142	1	5804	tags=48%, list=28%, signal=66%
KEGG_GLYCOSAMINOGLYCAN_BIOSYNTHESIS_CHONDROITIN_SULFATE	KEGG_GLYCOSAMINOGLYCAN_BIOSYNTHESIS_CHONDROITIN_SULFATE		22	0.570934	1.50076	0.0684105	0.219756	1	2592	tags=41%, list=13%, signal=47%
REACTOME_POST_TRANSLATIONAL_PROTEIN_MODIFICATION	REACTOME_POST_TRANSLATIONAL_PROTEIN_MODIFICATION		180	0.377039	1.50033	0.0155039	0.220054	1	4314	tags=28%, list=21%, signal=36%
CHIANG_LIVER_CANCER_SUBCLASS_POLYSOMY7_DN	CHIANG_LIVER_CANCER_SUBCLASS_POLYSOMY7_DN		22	0.600513	1.50015	0.0394477	0.219999	1	3457	tags=50%, list=17%, signal=60%
BIOCARTA_INTEGRIN_PATHWAY	BIOCARTA_INTEGRIN_PATHWAY		38	0.392374	1.49887	0.0885312	0.221406	1	6564	tags=47%, list=32%, signal=70%
OXFORD_RALA_OR_RALB_TARGETS_DN	OXFORD_RALA_OR_RALB_TARGETS_DN		24	0.506734	1.49611	0.0583501	0.224855	1	4593	tags=46%, list=22%, signal=59%
REACTOME_GLYCOSAMINOGLYCAN_METABOLISM	REACTOME_GLYCOSAMINOGLYCAN_METABOLISM		108	0.487023	1.49571	0.0550098	0.225085	1	3022	tags=33%, list=15%, signal=39%
JISON_SICKLE_CELL_DISEASE_UP	JISON_SICKLE_CELL_DISEASE_UP		179	0.437026	1.4956	0.066	0.224922	1	3439	tags=30%, list=17%, signal=35%
BROWNE_HCMV_INFECTION_20HR_UP	BROWNE_HCMV_INFECTION_20HR_UP		234	0.326059	1.49429	0.00604839	0.2264	1	4480	tags=27%, list=22%, signal=35%
MOHANKUMAR_HOXA1_TARGETS_DN	MOHANKUMAR_HOXA1_TARGETS_DN		181	0.512641	1.49389	0.0200401	0.226664	1	4709	tags=50%, list=23%, signal=64%
PID_IL1_PATHWAY	PID_IL1_PATHWAY		34	0.457846	1.4932	0.0910853	0.227306	1	6531	tags=56%, list=32%, signal=82%
KANG_GIST_WITH_PDGFRA_UP	KANG_GIST_WITH_PDGFRA_UP		50	0.577669	1.49319	0.0416667	0.227008	1	3670	tags=52%, list=18%, signal=63%
ST_GA13_PATHWAY	ST_GA13_PATHWAY		36	0.412	1.49312	0.0555556	0.226779	1	3878	tags=31%, list=19%, signal=38%
PID_IFNG_PATHWAY	PID_IFNG_PATHWAY		40	0.429055	1.49306	0.0959184	0.226521	1	6785	tags=58%, list=33%, signal=86%
HIRSCH_CELLULAR_TRANSFORMATION_SIGNATURE_UP	HIRSCH_CELLULAR_TRANSFORMATION_SIGNATURE_UP		241	0.398141	1.49291	0.0811359	0.22639	1	4600	tags=29%, list=22%, signal=37%
JOHNSTONE_PARVB_TARGETS_2_UP	JOHNSTONE_PARVB_TARGETS_2_UP		133	0.369503	1.49285	0.0719844	0.226151	1	3820	tags=23%, list=19%, signal=28%
LU_TUMOR_ANGIOGENESIS_UP	LU_TUMOR_ANGIOGENESIS_UP		25	0.541296	1.49261	0.0529532	0.226073	1	3439	tags=32%, list=17%, signal=38%
PID_HIF2PATHWAY	PID_HIF2PATHWAY		34	0.414596	1.49239	0.0731225	0.22605	1	5840	tags=44%, list=28%, signal=62%
BONOME_OVARIAN_CANCER_SURVIVAL_OPTIMAL_DEBULKING	BONOME_OVARIAN_CANCER_SURVIVAL_OPTIMAL_DEBULKING		242	0.34534	1.49168	0.0262626	0.226727	1	5747	tags=39%, list=28%, signal=53%
VALK_AML_CLUSTER_3	VALK_AML_CLUSTER_3		31	0.487848	1.49127	0.034413	0.22708	1	2109	tags=23%, list=10%, signal=25%
REACTOME_RORA_ACTIVATES_CIRCADIAN_EXPRESSION	REACTOME_RORA_ACTIVATES_CIRCADIAN_EXPRESSION		24	0.466695	1.49089	0.0974155	0.22729	1	6785	tags=63%, list=33%, signal=93%
ZWANG_CLASS_2_TRANSIENTLY_INDUCED_BY_EGF	ZWANG_CLASS_2_TRANSIENTLY_INDUCED_BY_EGF		49	0.5519	1.49068	0.043299	0.227261	1	3416	tags=39%, list=17%, signal=46%
GRABARCZYK_BCL11B_TARGETS_UP	GRABARCZYK_BCL11B_TARGETS_UP		74	0.414699	1.49008	0.0576541	0.227784	1	6767	tags=59%, list=33%, signal=88%
GROSS_HYPOXIA_VIA_ELK3_AND_HIF1A_DN	GROSS_HYPOXIA_VIA_ELK3_AND_HIF1A_DN		98	0.33246	1.48969	0.0704762	0.228012	1	5445	tags=38%, list=27%, signal=51%
BARIS_THYROID_CANCER_DN	BARIS_THYROID_CANCER_DN		59	0.373265	1.48883	0.0658683	0.228903	1	5704	tags=44%, list=28%, signal=61%
REACTOME_ENOS_ACTIVATION_AND_REGULATION	REACTOME_ENOS_ACTIVATION_AND_REGULATION		19	0.483771	1.48836	0.0673469	0.229181	1	5104	tags=37%, list=25%, signal=49%
VALK_AML_WITH_CEBPA	VALK_AML_WITH_CEBPA		35	0.52649	1.48834	0.0411765	0.228886	1	4538	tags=40%, list=22%, signal=51%
HAHTOLA_CTCL_CUTANEOUS	HAHTOLA_CTCL_CUTANEOUS		26	0.542677	1.48795	0.0524194	0.229121	1	3634	tags=46%, list=18%, signal=56%
SWEET_LUNG_CANCER_KRAS_DN	SWEET_LUNG_CANCER_KRAS_DN		430	0.494839	1.48775	0.0718563	0.229096	1	4227	tags=42%, list=21%, signal=52%
KEGG_MAPK_SIGNALING_PATHWAY	KEGG_MAPK_SIGNALING_PATHWAY		264	0.400512	1.48752	0.0220884	0.229076	1	4482	tags=33%, list=22%, signal=41%
GROSS_HYPOXIA_VIA_ELK3_DN	GROSS_HYPOXIA_VIA_ELK3_DN		155	0.440745	1.48695	0.0682731	0.22955	1	3806	tags=34%, list=19%, signal=41%
LEIN_LOCALIZED_TO_DISTAL_AND_PROXIMAL_DENDRITES	LEIN_LOCALIZED_TO_DISTAL_AND_PROXIMAL_DENDRITES		17	0.611066	1.48645	0.0521042	0.229913	1	5874	tags=59%, list=29%, signal=82%
VISALA_RESPONSE_TO_HEAT_SHOCK_AND_AGING_UP	VISALA_RESPONSE_TO_HEAT_SHOCK_AND_AGING_UP		15	0.504698	1.48625	0.0682731	0.229841	1	5028	tags=53%, list=25%, signal=71%
ZWANG_EGF_PERSISTENTLY_UP	ZWANG_EGF_PERSISTENTLY_UP		31	0.459147	1.48604	0.0419162	0.2298	1	3429	tags=26%, list=17%, signal=31%
ALONSO_METASTASIS_UP	ALONSO_METASTASIS_UP		196	0.280019	1.48601	0.0673077	0.229515	1	4437	tags=25%, list=22%, signal=32%
SARTIPY_BLUNTED_BY_INSULIN_RESISTANCE_UP	SARTIPY_BLUNTED_BY_INSULIN_RESISTANCE_UP		18	0.534733	1.48558	0.0715706	0.229759	1	2048	tags=33%, list=10%, signal=37%
RORIE_TARGETS_OF_EWSR1_FLI1_FUSION_UP	RORIE_TARGETS_OF_EWSR1_FLI1_FUSION_UP		28	0.524327	1.4847	0.0678295	0.230707	1	3414	tags=46%, list=17%, signal=56%
BOYAULT_LIVER_CANCER_SUBCLASS_G2	BOYAULT_LIVER_CANCER_SUBCLASS_G2		26	0.517151	1.4844	0.0401606	0.230819	1	3259	tags=38%, list=16%, signal=46%
GYORFFY_DOXORUBICIN_RESISTANCE	GYORFFY_DOXORUBICIN_RESISTANCE		50	0.513161	1.48427	0.0457256	0.230711	1	5124	tags=46%, list=25%, signal=61%
FRASOR_RESPONSE_TO_ESTRADIOL_UP	FRASOR_RESPONSE_TO_ESTRADIOL_UP		37	0.636566	1.4836	0.0400802	0.231304	1	3866	tags=54%, list=19%, signal=66%
TAKEDA_TARGETS_OF_NUP98_HOXA9_FUSION_3D_DN	TAKEDA_TARGETS_OF_NUP98_HOXA9_FUSION_3D_DN		30	0.643385	1.48345	0.0550098	0.231181	1	4911	tags=57%, list=24%, signal=74%
BROWNE_HCMV_INFECTION_18HR_UP	BROWNE_HCMV_INFECTION_18HR_UP		176	0.334032	1.48289	0.020284	0.231656	1	5942	tags=39%, list=29%, signal=54%
HUMMERICH_SKIN_CANCER_PROGRESSION_DN	HUMMERICH_SKIN_CANCER_PROGRESSION_DN		99	0.441658	1.48262	0.0823529	0.231692	1	3303	tags=27%, list=16%, signal=32%
PID_ANTHRAX_PATHWAY	PID_ANTHRAX_PATHWAY		17	0.604628	1.48196	0.0677291	0.232304	1	5579	tags=59%, list=27%, signal=81%
REACTOME_TOLL_RECEPTOR_CASCADES	REACTOME_TOLL_RECEPTOR_CASCADES		113	0.397215	1.48158	0.110454	0.232578	1	6109	tags=44%, list=30%, signal=63%
REACTOME_SMOOTH_MUSCLE_CONTRACTION	REACTOME_SMOOTH_MUSCLE_CONTRACTION		23	0.587922	1.48131	0.109589	0.232645	1	3121	tags=48%, list=15%, signal=56%
BIOCARTA_EGF_PATHWAY	BIOCARTA_EGF_PATHWAY		31	0.442371	1.48017	0.0901961	0.23386	1	6109	tags=45%, list=30%, signal=64%
RIGGI_EWING_SARCOMA_PROGENITOR_UP	RIGGI_EWING_SARCOMA_PROGENITOR_UP		414	0.485515	1.48011	0.0219561	0.233636	1	3570	tags=36%, list=17%, signal=43%
KYNG_DNA_DAMAGE_BY_UV	KYNG_DNA_DAMAGE_BY_UV		61	0.417746	1.48009	0.0415842	0.233341	1	4511	tags=34%, list=22%, signal=44%
YANG_BCL3_TARGETS_UP	YANG_BCL3_TARGETS_UP		360	0.437791	1.48004	0.0237154	0.233071	1	3298	tags=29%, list=16%, signal=34%
MATTHEWS_SKIN_CARCINOGENESIS_VIA_JUN	MATTHEWS_SKIN_CARCINOGENESIS_VIA_JUN		16	0.583802	1.47897	0.0591716	0.234252	1	2465	tags=44%, list=12%, signal=50%
RASHI_RESPONSE_TO_IONIZING_RADIATION_5	RASHI_RESPONSE_TO_IONIZING_RADIATION_5		143	0.328468	1.47761	0.029703	0.235903	1	5498	tags=33%, list=27%, signal=45%
REACTOME_CGMP_EFFECTS	REACTOME_CGMP_EFFECTS		19	0.709642	1.47738	0.0441767	0.235919	1	1006	tags=47%, list=5%, signal=50%
BREUHAHN_GROWTH_FACTOR_SIGNALING_IN_LIVER_CANCER	BREUHAHN_GROWTH_FACTOR_SIGNALING_IN_LIVER_CANCER		22	0.555184	1.47732	0.0735587	0.235682	1	2231	tags=32%, list=11%, signal=36%
NADLER_OBESITY_UP	NADLER_OBESITY_UP		61	0.506335	1.47712	0.122137	0.235645	1	5184	tags=51%, list=25%, signal=68%
CHEN_LVAD_SUPPORT_OF_FAILING_HEART_DN	CHEN_LVAD_SUPPORT_OF_FAILING_HEART_DN		41	0.557596	1.47648	0.0474308	0.236256	1	4287	tags=49%, list=21%, signal=62%
SANA_TNF_SIGNALING_DN	SANA_TNF_SIGNALING_DN		88	0.481131	1.47615	0.0949495	0.236435	1	4816	tags=45%, list=23%, signal=59%
BIOCARTA_RELA_PATHWAY	BIOCARTA_RELA_PATHWAY		16	0.469278	1.47568	0.0839844	0.236765	1	8788	tags=69%, list=43%, signal=120%
TONKS_TARGETS_OF_RUNX1_RUNX1T1_FUSION_MONOCYTE_DN	TONKS_TARGETS_OF_RUNX1_RUNX1T1_FUSION_MONOCYTE_DN		53	0.580156	1.47564	0.0780287	0.236492	1	3065	tags=36%, list=15%, signal=42%
IKEDA_MIR30_TARGETS_DN	IKEDA_MIR30_TARGETS_DN		26	0.561383	1.47552	0.0591837	0.236355	1	2802	tags=42%, list=14%, signal=49%
RUAN_RESPONSE_TO_TNF_TROGLITAZONE_UP	RUAN_RESPONSE_TO_TNF_TROGLITAZONE_UP		17	0.638243	1.47535	0.0507099	0.236285	1	2947	tags=35%, list=14%, signal=41%
BIOCARTA_AT1R_PATHWAY	BIOCARTA_AT1R_PATHWAY		32	0.390226	1.4744	0.0884615	0.237267	1	7654	tags=53%, list=37%, signal=85%
PID_FRA_PATHWAY	PID_FRA_PATHWAY		37	0.537362	1.47417	0.0633397	0.237301	1	3233	tags=41%, list=16%, signal=48%
JAATINEN_HEMATOPOIETIC_STEM_CELL_UP	JAATINEN_HEMATOPOIETIC_STEM_CELL_UP		304	0.422726	1.47399	0.0464646	0.237232	1	4417	tags=37%, list=22%, signal=47%
BIOCARTA_PTEN_PATHWAY	BIOCARTA_PTEN_PATHWAY		18	0.404756	1.47393	0.0748031	0.237045	1	8055	tags=61%, list=39%, signal=101%
BROWN_MYELOID_CELL_DEVELOPMENT_UP	BROWN_MYELOID_CELL_DEVELOPMENT_UP		161	0.514896	1.47385	0.0849802	0.236826	1	4738	tags=46%, list=23%, signal=59%
YAO_HOXA10_TARGETS_VIA_PROGESTERONE_DN	YAO_HOXA10_TARGETS_VIA_PROGESTERONE_DN		18	0.637209	1.47357	0.0565657	0.236919	1	1850	tags=50%, list=9%, signal=55%
GENTILE_UV_RESPONSE_CLUSTER_D8	GENTILE_UV_RESPONSE_CLUSTER_D8		40	0.417529	1.47349	0.100193	0.236714	1	5848	tags=43%, list=29%, signal=59%
NAKAYAMA_FGF2_TARGETS	NAKAYAMA_FGF2_TARGETS		27	0.531615	1.47329	0.0755814	0.236684	1	3111	tags=41%, list=15%, signal=48%
ELVIDGE_HIF1A_AND_HIF2A_TARGETS_DN	ELVIDGE_HIF1A_AND_HIF2A_TARGETS_DN		102	0.443018	1.47261	0.0797665	0.237285	1	3298	tags=29%, list=16%, signal=35%
MCDOWELL_ACUTE_LUNG_INJURY_UP	MCDOWELL_ACUTE_LUNG_INJURY_UP		45	0.548461	1.47185	0.0692464	0.238029	1	2531	tags=31%, list=12%, signal=35%
GAVIN_FOXP3_TARGETS_CLUSTER_P3	GAVIN_FOXP3_TARGETS_CLUSTER_P3		156	0.46017	1.47178	0.0455487	0.237812	1	3741	tags=35%, list=18%, signal=43%
GRAESSMANN_RESPONSE_TO_MC_AND_SERUM_DEPRIVATION_UP	GRAESSMANN_RESPONSE_TO_MC_AND_SERUM_DEPRIVATION_UP		205	0.435379	1.47142	0.0575397	0.238005	1	3760	tags=37%, list=18%, signal=45%
ZHOU_INFLAMMATORY_RESPONSE_FIMA_UP	ZHOU_INFLAMMATORY_RESPONSE_FIMA_UP		499	0.426306	1.47139	0.00988142	0.237729	1	3638	tags=32%, list=18%, signal=38%
DORSAM_HOXA9_TARGETS_DN	DORSAM_HOXA9_TARGETS_DN		31	0.418709	1.47116	0.0805785	0.237705	1	5597	tags=45%, list=27%, signal=62%
MEDINA_SMARCA4_TARGETS	MEDINA_SMARCA4_TARGETS		44	0.395298	1.47109	0.0568627	0.237504	1	4015	tags=23%, list=20%, signal=28%
GARGALOVIC_RESPONSE_TO_OXIDIZED_PHOSPHOLIPIDS_MAGENTA_UP	GARGALOVIC_RESPONSE_TO_OXIDIZED_PHOSPHOLIPIDS_MAGENTA_UP		27	0.433598	1.47107	0.12	0.237218	1	5474	tags=44%, list=27%, signal=61%
HOLLERN_ADENOMYOEPITHELIAL_BREAST_TUMOR	HOLLERN_ADENOMYOEPITHELIAL_BREAST_TUMOR		17	0.635865	1.47057	0.0750507	0.237677	1	3121	tags=53%, list=15%, signal=62%
LIU_BREAST_CANCER	LIU_BREAST_CANCER		24	0.496294	1.47052	0.046	0.237438	1	4341	tags=42%, list=21%, signal=53%
REACTOME_CHONDROITIN_SULFATE_DERMATAN_SULFATE_METABOLISM	REACTOME_CHONDROITIN_SULFATE_DERMATAN_SULFATE_METABOLISM		47	0.511261	1.47037	0.0688259	0.237343	1	3022	tags=38%, list=15%, signal=45%
FIRESTEIN_CTNNB1_PATHWAY	FIRESTEIN_CTNNB1_PATHWAY		32	0.465403	1.4697	0.0612648	0.23792	1	1347	tags=19%, list=7%, signal=20%
REACTOME_NITRIC_OXIDE_STIMULATES_GUANYLATE_CYCLASE	REACTOME_NITRIC_OXIDE_STIMULATES_GUANYLATE_CYCLASE		25	0.67414	1.46916	0.054	0.238352	1	2070	tags=48%, list=10%, signal=53%
PID_P38_ALPHA_BETA_DOWNSTREAM_PATHWAY	PID_P38_ALPHA_BETA_DOWNSTREAM_PATHWAY		38	0.361272	1.4689	0.0735587	0.238398	1	6260	tags=45%, list=31%, signal=64%
HESS_TARGETS_OF_HOXA9_AND_MEIS1_DN	HESS_TARGETS_OF_HOXA9_AND_MEIS1_DN		76	0.591699	1.46843	0.0944882	0.238729	1	2536	tags=39%, list=12%, signal=45%
PUIFFE_INVASION_INHIBITED_BY_ASCITES_DN	PUIFFE_INVASION_INHIBITED_BY_ASCITES_DN		142	0.289992	1.46819	0.0712831	0.238728	1	4646	tags=27%, list=23%, signal=35%
BOYAULT_LIVER_CANCER_SUBCLASS_G56_DN	BOYAULT_LIVER_CANCER_SUBCLASS_G56_DN		17	0.540375	1.46785	0.0810811	0.238853	1	3997	tags=41%, list=19%, signal=51%
KEGG_ACUTE_MYELOID_LEUKEMIA	KEGG_ACUTE_MYELOID_LEUKEMIA		57	0.392058	1.46777	0.086444	0.238641	1	4664	tags=33%, list=23%, signal=43%
OSADA_ASCL1_TARGETS_DN	OSADA_ASCL1_TARGETS_DN		24	0.609122	1.46769	0.052	0.23844	1	3237	tags=50%, list=16%, signal=59%
AMUNDSON_DNA_DAMAGE_RESPONSE_TP53	AMUNDSON_DNA_DAMAGE_RESPONSE_TP53		16	0.535456	1.46706	0.0922432	0.239	1	6010	tags=50%, list=29%, signal=71%
REACTOME_NGF_SIGNALLING_VIA_TRKA_FROM_THE_PLASMA_MEMBRANE	REACTOME_NGF_SIGNALLING_VIA_TRKA_FROM_THE_PLASMA_MEMBRANE		134	0.327162	1.46699	0.0731225	0.238791	1	6609	tags=45%, list=32%, signal=66%
FALVELLA_SMOKERS_WITH_LUNG_CANCER	FALVELLA_SMOKERS_WITH_LUNG_CANCER		77	0.438262	1.46632	0.0574257	0.2394	1	1698	tags=16%, list=8%, signal=17%
INGRAM_SHH_TARGETS_DN	INGRAM_SHH_TARGETS_DN		62	0.499301	1.46627	0.0517928	0.239146	1	3119	tags=34%, list=15%, signal=40%
PID_FCER1_PATHWAY	PID_FCER1_PATHWAY		61	0.506564	1.46605	0.108871	0.239149	1	6564	tags=54%, list=32%, signal=79%
IVANOVA_HEMATOPOIESIS_STEM_CELL_LONG_TERM	IVANOVA_HEMATOPOIESIS_STEM_CELL_LONG_TERM		296	0.394012	1.46512	0.0441767	0.240054	1	3300	tags=30%, list=16%, signal=36%
CLIMENT_BREAST_CANCER_COPY_NUMBER_UP	CLIMENT_BREAST_CANCER_COPY_NUMBER_UP		23	0.523879	1.4651	0.0443548	0.239773	1	3233	tags=35%, list=16%, signal=41%
TERAMOTO_OPN_TARGETS_CLUSTER_6	TERAMOTO_OPN_TARGETS_CLUSTER_6		27	0.490738	1.46438	0.0678643	0.24055	1	2791	tags=33%, list=14%, signal=39%
TSUNODA_CISPLATIN_RESISTANCE_DN	TSUNODA_CISPLATIN_RESISTANCE_DN		48	0.493139	1.46368	0.0462777	0.241225	1	4588	tags=44%, list=22%, signal=56%
TSENG_IRS1_TARGETS_UP	TSENG_IRS1_TARGETS_UP		113	0.407091	1.46343	0.0742188	0.241269	1	3084	tags=24%, list=15%, signal=28%
CASORELLI_APL_SECONDARY_VS_DE_NOVO_UP	CASORELLI_APL_SECONDARY_VS_DE_NOVO_UP		38	0.501142	1.46312	0.0632653	0.241384	1	2796	tags=34%, list=14%, signal=40%
KEGG_RENAL_CELL_CARCINOMA	KEGG_RENAL_CELL_CARCINOMA		70	0.349894	1.46142	0.119284	0.243568	1	6965	tags=49%, list=34%, signal=73%
WEINMANN_ADAPTATION_TO_HYPOXIA_DN	WEINMANN_ADAPTATION_TO_HYPOXIA_DN		41	0.533304	1.4613	0.059761	0.243423	1	5217	tags=56%, list=25%, signal=75%
HE_PTEN_TARGETS_UP	HE_PTEN_TARGETS_UP		16	0.577926	1.46057	0.0714286	0.244156	1	5191	tags=56%, list=25%, signal=75%
WOTTON_RUNX_TARGETS_UP	WOTTON_RUNX_TARGETS_UP		21	0.577708	1.46038	0.0534653	0.244089	1	3718	tags=52%, list=18%, signal=64%
BIOCARTA_COMP_PATHWAY	BIOCARTA_COMP_PATHWAY		18	0.659297	1.45914	0.0446602	0.245479	1	5184	tags=67%, list=25%, signal=89%
BOYLAN_MULTIPLE_MYELOMA_C_D_DN	BOYLAN_MULTIPLE_MYELOMA_C_D_DN		249	0.501989	1.45865	0.0554455	0.245826	1	4959	tags=50%, list=24%, signal=65%
LABBE_TGFB1_TARGETS_UP	LABBE_TGFB1_TARGETS_UP		101	0.440555	1.45863	0.0323887	0.245545	1	4876	tags=43%, list=24%, signal=56%
WANG_IMMORTALIZED_BY_HOXA9_AND_MEIS1_DN	WANG_IMMORTALIZED_BY_HOXA9_AND_MEIS1_DN		24	0.629824	1.45841	0.0905512	0.245593	1	3052	tags=50%, list=15%, signal=59%
MONNIER_POSTRADIATION_TUMOR_ESCAPE_DN	MONNIER_POSTRADIATION_TUMOR_ESCAPE_DN		356	0.288877	1.45818	0.0309917	0.2456	1	4411	tags=26%, list=22%, signal=33%
ZHANG_RESPONSE_TO_IKK_INHIBITOR_AND_TNF_UP	ZHANG_RESPONSE_TO_IKK_INHIBITOR_AND_TNF_UP		219	0.484652	1.45632	0.0813492	0.247912	1	3457	tags=32%, list=17%, signal=37%
MIKKELSEN_ES_HCP_WITH_H3K27ME3	MIKKELSEN_ES_HCP_WITH_H3K27ME3		41	0.623755	1.45566	0.0325203	0.248536	1	2573	tags=49%, list=13%, signal=56%
DOANE_RESPONSE_TO_ANDROGEN_DN	DOANE_RESPONSE_TO_ANDROGEN_DN		233	0.339457	1.45517	0.0473485	0.248894	1	4872	tags=34%, list=24%, signal=45%
ZHAN_MULTIPLE_MYELOMA_MS_UP	ZHAN_MULTIPLE_MYELOMA_MS_UP		47	0.545613	1.45497	0.0688259	0.248856	1	4241	tags=53%, list=21%, signal=67%
PID_IL8_CXCR1_PATHWAY	PID_IL8_CXCR1_PATHWAY		28	0.581244	1.4549	0.0861057	0.248658	1	3878	tags=46%, list=19%, signal=57%
TONKS_TARGETS_OF_RUNX1_RUNX1T1_FUSION_SUSTAINDED_IN_ERYTHROCYTE_UP	TONKS_TARGETS_OF_RUNX1_RUNX1T1_FUSION_SUSTAINDED_IN_ERYTHROCYTE_UP		44	0.493511	1.45258	0.0644531	0.251427	1	5736	tags=50%, list=28%, signal=69%
KEGG_GLYCOSAMINOGLYCAN_DEGRADATION	KEGG_GLYCOSAMINOGLYCAN_DEGRADATION		21	0.534942	1.45246	0.0701754	0.251303	1	1758	tags=24%, list=9%, signal=26%
NIELSEN_GIST_AND_SYNOVIAL_SARCOMA_DN	NIELSEN_GIST_AND_SYNOVIAL_SARCOMA_DN		20	0.70425	1.45159	0.0801527	0.252204	1	3047	tags=65%, list=15%, signal=76%
CERVERA_SDHB_TARGETS_1_UP	CERVERA_SDHB_TARGETS_1_UP		118	0.490903	1.45155	0.024	0.251963	1	3638	tags=43%, list=18%, signal=52%
REACTOME_CIRCADIAN_REPRESSION_OF_EXPRESSION_BY_REV_ERBA	REACTOME_CIRCADIAN_REPRESSION_OF_EXPRESSION_BY_REV_ERBA		23	0.472973	1.45119	0.0993915	0.252217	1	5244	tags=48%, list=26%, signal=64%
REACTOME_HEMOSTASIS	REACTOME_HEMOSTASIS		446	0.399691	1.45072	0.0410156	0.252592	1	4614	tags=34%, list=23%, signal=43%
CONCANNON_APOPTOSIS_BY_EPOXOMICIN_UP	CONCANNON_APOPTOSIS_BY_EPOXOMICIN_UP		235	0.352803	1.45036	0.0513347	0.252776	1	4672	tags=30%, list=23%, signal=39%
BIOCARTA_PITX2_PATHWAY	BIOCARTA_PITX2_PATHWAY		15	0.485402	1.45008	0.0847784	0.252835	1	6114	tags=60%, list=30%, signal=85%
DAUER_STAT3_TARGETS_DN	DAUER_STAT3_TARGETS_DN		50	0.599607	1.44989	0.140206	0.252817	1	5427	tags=68%, list=26%, signal=92%
YAO_TEMPORAL_RESPONSE_TO_PROGESTERONE_CLUSTER_15	YAO_TEMPORAL_RESPONSE_TO_PROGESTERONE_CLUSTER_15		35	0.482804	1.44974	0.045977	0.25273	1	1949	tags=26%, list=10%, signal=28%
VANASSE_BCL2_TARGETS_DN	VANASSE_BCL2_TARGETS_DN		73	0.469408	1.44961	0.0571429	0.252597	1	2271	tags=25%, list=11%, signal=28%
MULLIGHAN_NPM1_SIGNATURE_3_UP	MULLIGHAN_NPM1_SIGNATURE_3_UP		326	0.319588	1.44953	0.0273973	0.252374	1	5373	tags=33%, list=26%, signal=44%
GEISS_RESPONSE_TO_DSRNA_UP	GEISS_RESPONSE_TO_DSRNA_UP		38	0.500106	1.44854	0.0881148	0.253408	1	5560	tags=58%, list=27%, signal=79%
MARTINEZ_RESPONSE_TO_TRABECTEDIN_DN	MARTINEZ_RESPONSE_TO_TRABECTEDIN_DN		266	0.276484	1.44793	0.136015	0.25395	1	6986	tags=41%, list=34%, signal=61%
BIOCARTA_NDKDYNAMIN_PATHWAY	BIOCARTA_NDKDYNAMIN_PATHWAY		18	0.431558	1.44749	0.109804	0.254236	1	2145	tags=11%, list=10%, signal=12%
LEE_NEURAL_CREST_STEM_CELL_UP	LEE_NEURAL_CREST_STEM_CELL_UP		146	0.488755	1.44683	0.0633663	0.254832	1	2699	tags=37%, list=13%, signal=42%
RUTELLA_RESPONSE_TO_CSF2RB_AND_IL4_DN	RUTELLA_RESPONSE_TO_CSF2RB_AND_IL4_DN		308	0.456837	1.44657	0.105675	0.254903	1	5002	tags=43%, list=24%, signal=55%
REACTOME_DEVELOPMENTAL_BIOLOGY	REACTOME_DEVELOPMENTAL_BIOLOGY		381	0.381148	1.44555	0.0524194	0.256103	1	3552	tags=25%, list=17%, signal=30%
LUI_THYROID_CANCER_CLUSTER_2	LUI_THYROID_CANCER_CLUSTER_2		42	0.45585	1.44507	0.064	0.256462	1	3874	tags=31%, list=19%, signal=38%
PEDERSEN_METASTASIS_BY_ERBB2_ISOFORM_6	PEDERSEN_METASTASIS_BY_ERBB2_ISOFORM_6		29	0.588422	1.44499	0.0593047	0.256291	1	4307	tags=69%, list=21%, signal=87%
HENDRICKS_SMARCA4_TARGETS_DN	HENDRICKS_SMARCA4_TARGETS_DN		47	0.477117	1.44462	0.0697674	0.256473	1	3833	tags=34%, list=19%, signal=42%
INGRAM_SHH_TARGETS_UP	INGRAM_SHH_TARGETS_UP		125	0.448633	1.44455	0.0782779	0.256274	1	3670	tags=35%, list=18%, signal=43%
GAZDA_DIAMOND_BLACKFAN_ANEMIA_ERYTHROID_UP	GAZDA_DIAMOND_BLACKFAN_ANEMIA_ERYTHROID_UP		25	0.397623	1.44454	0.110454	0.25597	1	3830	tags=28%, list=19%, signal=34%
LABBE_TARGETS_OF_TGFB1_AND_WNT3A_UP	LABBE_TARGETS_OF_TGFB1_AND_WNT3A_UP		110	0.471407	1.44428	0.044	0.256019	1	3283	tags=34%, list=16%, signal=40%
BAKKER_FOXO3_TARGETS_UP	BAKKER_FOXO3_TARGETS_UP		60	0.389387	1.44378	0.0971074	0.256449	1	5040	tags=42%, list=25%, signal=55%
KEGG_MTOR_SIGNALING_PATHWAY	KEGG_MTOR_SIGNALING_PATHWAY		52	0.349718	1.44329	0.0763209	0.256832	1	7204	tags=50%, list=35%, signal=77%
RAMPON_ENRICHED_LEARNING_ENVIRONMENT_EARLY_UP	RAMPON_ENRICHED_LEARNING_ENVIRONMENT_EARLY_UP		15	0.507218	1.44282	0.110417	0.257114	1	5495	tags=33%, list=27%, signal=46%
WAGNER_APO2_SENSITIVITY	WAGNER_APO2_SENSITIVITY		25	0.573464	1.44279	0.035503	0.25684	1	3810	tags=48%, list=19%, signal=59%
REACTOME_NUCLEAR_EVENTS_KINASE_AND_TRANSCRIPTION_FACTOR_ACTIVATION	REACTOME_NUCLEAR_EVENTS_KINASE_AND_TRANSCRIPTION_FACTOR_ACTIVATION		24	0.416919	1.44258	0.111546	0.256848	1	6564	tags=50%, list=32%, signal=73%
LINDGREN_BLADDER_CANCER_CLUSTER_3_DN	LINDGREN_BLADDER_CANCER_CLUSTER_3_DN		220	0.353325	1.44168	0.0557851	0.257798	1	4805	tags=34%, list=23%, signal=44%
BIOCARTA_UCALPAIN_PATHWAY	BIOCARTA_UCALPAIN_PATHWAY		18	0.53262	1.44149	0.102564	0.257735	1	5153	tags=50%, list=25%, signal=67%
CAIRO_HEPATOBLASTOMA_CLASSES_DN	CAIRO_HEPATOBLASTOMA_CLASSES_DN		208	0.4684	1.44145	0.0704501	0.257482	1	3815	tags=34%, list=19%, signal=42%
HARRIS_BRAIN_CANCER_PROGENITORS	HARRIS_BRAIN_CANCER_PROGENITORS		42	0.570862	1.44141	0.0680934	0.257222	1	2493	tags=45%, list=12%, signal=51%
KEGG_CHRONIC_MYELOID_LEUKEMIA	KEGG_CHRONIC_MYELOID_LEUKEMIA		73	0.315075	1.441	0.0746269	0.257478	1	6564	tags=44%, list=32%, signal=64%
CHANDRAN_METASTASIS_UP	CHANDRAN_METASTASIS_UP		209	0.260958	1.44027	0.0362903	0.258298	1	6806	tags=41%, list=33%, signal=60%
KEGG_OTHER_GLYCAN_DEGRADATION	KEGG_OTHER_GLYCAN_DEGRADATION		16	0.467102	1.4397	0.0856574	0.258843	1	5896	tags=44%, list=29%, signal=61%
GENTLES_LEUKEMIC_STEM_CELL_UP	GENTLES_LEUKEMIC_STEM_CELL_UP		28	0.603643	1.43951	0.0823293	0.258781	1	4156	tags=46%, list=20%, signal=58%
PID_IL6_7_PATHWAY	PID_IL6_7_PATHWAY		47	0.458117	1.43878	0.115768	0.259487	1	5777	tags=49%, list=28%, signal=68%
UDAYAKUMAR_MED1_TARGETS_DN	UDAYAKUMAR_MED1_TARGETS_DN		229	0.300751	1.43842	0.0715706	0.25964	1	6186	tags=38%, list=30%, signal=54%
PARK_APL_PATHOGENESIS_DN	PARK_APL_PATHOGENESIS_DN		50	0.467149	1.43791	0.121857	0.26007	1	5886	tags=52%, list=29%, signal=73%
GOTTWEIN_TARGETS_OF_KSHV_MIR_K12_11	GOTTWEIN_TARGETS_OF_KSHV_MIR_K12_11		63	0.346555	1.43662	0.0852713	0.261624	1	5981	tags=38%, list=29%, signal=54%
LIM_MAMMARY_STEM_CELL_UP	LIM_MAMMARY_STEM_CELL_UP		483	0.547173	1.43657	0.0961924	0.261386	1	3402	tags=44%, list=17%, signal=51%
KEGG_CELL_ADHESION_MOLECULES_CAMS	KEGG_CELL_ADHESION_MOLECULES_CAMS		113	0.532296	1.43629	0.0891473	0.261465	1	3332	tags=39%, list=16%, signal=46%
PID_CXCR4_PATHWAY	PID_CXCR4_PATHWAY		100	0.44808	1.43497	0.129412	0.263065	1	5777	tags=45%, list=28%, signal=62%
SHARMA_PILOCYTIC_ASTROCYTOMA_LOCATION_UP	SHARMA_PILOCYTIC_ASTROCYTOMA_LOCATION_UP		25	0.538779	1.43487	0.0727273	0.262876	1	2010	tags=32%, list=10%, signal=35%
PID_PTP1B_PATHWAY	PID_PTP1B_PATHWAY		52	0.469091	1.43475	0.0846154	0.262723	1	5777	tags=50%, list=28%, signal=69%
BIOCARTA_RAS_PATHWAY	BIOCARTA_RAS_PATHWAY		23	0.368554	1.43424	0.08413	0.263146	1	5153	tags=26%, list=25%, signal=35%
SEITZ_NEOPLASTIC_TRANSFORMATION_BY_8P_DELETION_DN	SEITZ_NEOPLASTIC_TRANSFORMATION_BY_8P_DELETION_DN		30	0.52622	1.43367	0.0850622	0.263723	1	2829	tags=33%, list=14%, signal=39%
DER_IFN_BETA_RESPONSE_UP	DER_IFN_BETA_RESPONSE_UP		98	0.436493	1.43322	0.170431	0.26401	1	5560	tags=45%, list=27%, signal=61%
BIOCARTA_NFKB_PATHWAY	BIOCARTA_NFKB_PATHWAY		23	0.466587	1.43319	0.144289	0.26374	1	7139	tags=52%, list=35%, signal=80%
WARTERS_RESPONSE_TO_IR_SKIN	WARTERS_RESPONSE_TO_IR_SKIN		77	0.423117	1.43139	0.0531697	0.266033	1	4269	tags=35%, list=21%, signal=44%
REACTOME_PLATELET_ACTIVATION_SIGNALING_AND_AGGREGATION	REACTOME_PLATELET_ACTIVATION_SIGNALING_AND_AGGREGATION		195	0.424175	1.43123	0.0836576	0.265934	1	3821	tags=30%, list=19%, signal=37%
VERHAAK_AML_WITH_NPM1_MUTATED_DN	VERHAAK_AML_WITH_NPM1_MUTATED_DN		238	0.478984	1.43104	0.0701754	0.265942	1	5500	tags=51%, list=27%, signal=69%
FLORIO_NEOCORTEX_BASAL_RADIAL_GLIA_UP	FLORIO_NEOCORTEX_BASAL_RADIAL_GLIA_UP		334	0.483103	1.43098	0.020284	0.265689	1	3102	tags=35%, list=15%, signal=41%
PID_IL8_CXCR2_PATHWAY	PID_IL8_CXCR2_PATHWAY		34	0.561653	1.43082	0.106299	0.265616	1	3721	tags=38%, list=18%, signal=47%
MATTHEWS_AP1_TARGETS	MATTHEWS_AP1_TARGETS		17	0.609509	1.43034	0.0787879	0.266014	1	1303	tags=29%, list=6%, signal=31%
BILANGES_SERUM_SENSITIVE_VIA_TSC2	BILANGES_SERUM_SENSITIVE_VIA_TSC2		39	0.385425	1.42981	0.0933333	0.266514	1	5671	tags=49%, list=28%, signal=67%
BIOCARTA_MCALPAIN_PATHWAY	BIOCARTA_MCALPAIN_PATHWAY		25	0.47838	1.42962	0.07393	0.266501	1	4725	tags=48%, list=23%, signal=62%
REACTOME_ACTIVATED_TLR4_SIGNALLING	REACTOME_ACTIVATED_TLR4_SIGNALLING		90	0.353014	1.42957	0.116601	0.266279	1	6564	tags=46%, list=32%, signal=67%
PEPPER_CHRONIC_LYMPHOCYTIC_LEUKEMIA_UP	PEPPER_CHRONIC_LYMPHOCYTIC_LEUKEMIA_UP		33	0.566064	1.42944	0.0558882	0.266145	1	1828	tags=30%, list=9%, signal=33%
ZHAN_VARIABLE_EARLY_DIFFERENTIATION_GENES_UP	ZHAN_VARIABLE_EARLY_DIFFERENTIATION_GENES_UP		15	0.569039	1.42843	0.0735587	0.267333	1	2450	tags=33%, list=12%, signal=38%
HUTTMANN_B_CLL_POOR_SURVIVAL_DN	HUTTMANN_B_CLL_POOR_SURVIVAL_DN		59	0.495382	1.42652	0.0802469	0.269839	1	5557	tags=58%, list=27%, signal=79%
MALONEY_RESPONSE_TO_17AAG_UP	MALONEY_RESPONSE_TO_17AAG_UP		41	0.420075	1.42581	0.130705	0.270547	1	4455	tags=32%, list=22%, signal=40%
WIERENGA_STAT5A_TARGETS_GROUP2	WIERENGA_STAT5A_TARGETS_GROUP2		59	0.582589	1.42575	0.0952381	0.27033	1	3592	tags=44%, list=18%, signal=53%
NEMETH_INFLAMMATORY_RESPONSE_LPS_UP	NEMETH_INFLAMMATORY_RESPONSE_LPS_UP		88	0.467181	1.42538	0.141748	0.270561	1	3601	tags=32%, list=18%, signal=38%
REACTOME_CELL_SURFACE_INTERACTIONS_AT_THE_VASCULAR_WALL	REACTOME_CELL_SURFACE_INTERACTIONS_AT_THE_VASCULAR_WALL		84	0.490341	1.42514	0.0860421	0.270582	1	3042	tags=31%, list=15%, signal=36%
YAO_TEMPORAL_RESPONSE_TO_PROGESTERONE_CLUSTER_0	YAO_TEMPORAL_RESPONSE_TO_PROGESTERONE_CLUSTER_0		74	0.449242	1.42413	0.0981964	0.271765	1	4444	tags=36%, list=22%, signal=46%
GARCIA_TARGETS_OF_FLI1_AND_DAX1_UP	GARCIA_TARGETS_OF_FLI1_AND_DAX1_UP		55	0.394996	1.42384	0.104208	0.271918	1	5039	tags=42%, list=25%, signal=55%
GAVIN_FOXP3_TARGETS_CLUSTER_T4	GAVIN_FOXP3_TARGETS_CLUSTER_T4		90	0.423482	1.42365	0.128968	0.271931	1	4784	tags=36%, list=23%, signal=46%
BONCI_TARGETS_OF_MIR15A_AND_MIR16_1	BONCI_TARGETS_OF_MIR15A_AND_MIR16_1		90	0.448126	1.42288	0.0657371	0.272747	1	5648	tags=42%, list=28%, signal=58%
COATES_MACROPHAGE_M1_VS_M2_UP	COATES_MACROPHAGE_M1_VS_M2_UP		80	0.422416	1.42281	0.0707071	0.272543	1	1970	tags=24%, list=10%, signal=26%
VALK_AML_WITH_FLT3_ITD	VALK_AML_WITH_FLT3_ITD		39	0.548828	1.42238	0.0416667	0.272838	1	2380	tags=36%, list=12%, signal=41%
BUCKANOVICH_T_LYMPHOCYTE_HOMING_ON_TUMOR_UP	BUCKANOVICH_T_LYMPHOCYTE_HOMING_ON_TUMOR_UP		22	0.490011	1.42227	0.10495	0.27268	1	3037	tags=41%, list=15%, signal=48%
REACTOME_PLATELET_AGGREGATION_PLUG_FORMATION	REACTOME_PLATELET_AGGREGATION_PLUG_FORMATION		35	0.501917	1.4214	0.061657	0.273666	1	2814	tags=31%, list=14%, signal=36%
NOJIMA_SFRP2_TARGETS_UP	NOJIMA_SFRP2_TARGETS_UP		31	0.495644	1.42073	0.10119	0.274377	1	2452	tags=26%, list=12%, signal=29%
CHANGOLKAR_H2AFY_TARGETS_UP	CHANGOLKAR_H2AFY_TARGETS_UP		47	0.36831	1.42061	0.0525292	0.27426	1	6095	tags=49%, list=30%, signal=69%
KANG_AR_TARGETS_UP	KANG_AR_TARGETS_UP		17	0.584339	1.41981	0.0755467	0.275089	1	4359	tags=65%, list=21%, signal=82%
GARGALOVIC_RESPONSE_TO_OXIDIZED_PHOSPHOLIPIDS_BLUE_DN	GARGALOVIC_RESPONSE_TO_OXIDIZED_PHOSPHOLIPIDS_BLUE_DN		58	0.442369	1.41976	0.0767635	0.274821	1	4321	tags=34%, list=21%, signal=44%
BROWNE_HCMV_INFECTION_2HR_DN	BROWNE_HCMV_INFECTION_2HR_DN		49	0.455763	1.41937	0.0710059	0.275082	1	4598	tags=41%, list=22%, signal=52%
REACTOME_SIGNALING_BY_FGFR1_FUSION_MUTANTS	REACTOME_SIGNALING_BY_FGFR1_FUSION_MUTANTS		17	0.402272	1.4192	0.124498	0.27501	1	5745	tags=41%, list=28%, signal=57%
IWANAGA_CARCINOGENESIS_BY_KRAS_DN	IWANAGA_CARCINOGENESIS_BY_KRAS_DN		118	0.38647	1.4187	0.0613497	0.275422	1	4459	tags=30%, list=22%, signal=38%
SMID_BREAST_CANCER_LUMINAL_A_UP	SMID_BREAST_CANCER_LUMINAL_A_UP		83	0.69464	1.41838	0.12249	0.27555	1	2780	tags=51%, list=14%, signal=58%
UEDA_PERIFERAL_CLOCK	UEDA_PERIFERAL_CLOCK		166	0.279532	1.41795	0.042471	0.275864	1	4984	tags=24%, list=24%, signal=32%
JAEGER_METASTASIS_UP	JAEGER_METASTASIS_UP		43	0.530539	1.41728	0.0862745	0.276548	1	2087	tags=35%, list=10%, signal=39%
GRESHOCK_CANCER_COPY_NUMBER_UP	GRESHOCK_CANCER_COPY_NUMBER_UP		318	0.334689	1.41721	0.0569745	0.276346	1	4917	tags=32%, list=24%, signal=42%
BERNARD_PPAPDC1B_TARGETS_DN	BERNARD_PPAPDC1B_TARGETS_DN		55	0.43463	1.4167	0.0607843	0.276848	1	4176	tags=44%, list=20%, signal=55%
PID_ARF6_PATHWAY	PID_ARF6_PATHWAY		35	0.509682	1.41636	0.0943026	0.276987	1	4836	tags=43%, list=24%, signal=56%
TAKEDA_TARGETS_OF_NUP98_HOXA9_FUSION_10D_DN	TAKEDA_TARGETS_OF_NUP98_HOXA9_FUSION_10D_DN		136	0.536079	1.41602	0.0767717	0.277212	1	3076	tags=38%, list=15%, signal=44%
ZHANG_RESPONSE_TO_CANTHARIDIN_UP	ZHANG_RESPONSE_TO_CANTHARIDIN_UP		19	0.556008	1.41593	0.109504	0.277023	1	5846	tags=58%, list=29%, signal=81%
MIYAGAWA_TARGETS_OF_EWSR1_ETS_FUSIONS_UP	MIYAGAWA_TARGETS_OF_EWSR1_ETS_FUSIONS_UP		250	0.413869	1.41566	0.0524194	0.277097	1	4539	tags=36%, list=22%, signal=45%
REACTOME_CTLA4_INHIBITORY_SIGNALING	REACTOME_CTLA4_INHIBITORY_SIGNALING		21	0.519258	1.41559	0.154426	0.276878	1	4447	tags=29%, list=22%, signal=36%
MULLIGHAN_NPM1_MUTATED_SIGNATURE_1_UP	MULLIGHAN_NPM1_MUTATED_SIGNATURE_1_UP		264	0.33033	1.41466	0.0387597	0.277911	1	4310	tags=27%, list=21%, signal=34%
MARTORIATI_MDM4_TARGETS_NEUROEPITHELIUM_UP	MARTORIATI_MDM4_TARGETS_NEUROEPITHELIUM_UP		170	0.360766	1.41408	0.0525292	0.27843	1	3385	tags=24%, list=17%, signal=28%
LEE_TARGETS_OF_PTCH1_AND_SUFU_DN	LEE_TARGETS_OF_PTCH1_AND_SUFU_DN		82	0.486288	1.41402	0.048583	0.278219	1	1481	tags=23%, list=7%, signal=25%
BIOCARTA_TOLL_PATHWAY	BIOCARTA_TOLL_PATHWAY		37	0.455681	1.41383	0.145098	0.278175	1	6496	tags=51%, list=32%, signal=75%
PID_EPO_PATHWAY	PID_EPO_PATHWAY		34	0.404415	1.41293	0.118774	0.279263	1	8055	tags=76%, list=39%, signal=126%
RICKMAN_HEAD_AND_NECK_CANCER_B	RICKMAN_HEAD_AND_NECK_CANCER_B		43	0.576425	1.41288	0.0482897	0.279038	1	590	tags=26%, list=3%, signal=26%
STEIN_ESRRA_TARGETS_RESPONSIVE_TO_ESTROGEN_UP	STEIN_ESRRA_TARGETS_RESPONSIVE_TO_ESTROGEN_UP		31	0.429027	1.41263	0.0629921	0.279102	1	3714	tags=26%, list=18%, signal=31%
DITTMER_PTHLH_TARGETS_UP	DITTMER_PTHLH_TARGETS_UP		110	0.266527	1.41234	0.107075	0.279286	1	2569	tags=14%, list=13%, signal=16%
BREDEMEYER_RAG_SIGNALING_VIA_ATM_NOT_VIA_NFKB_DN	BREDEMEYER_RAG_SIGNALING_VIA_ATM_NOT_VIA_NFKB_DN		36	0.401245	1.412	0.0795918	0.279453	1	6701	tags=58%, list=33%, signal=87%
PAPASPYRIDONOS_UNSTABLE_ATEROSCLEROTIC_PLAQUE_DN	PAPASPYRIDONOS_UNSTABLE_ATEROSCLEROTIC_PLAQUE_DN		43	0.567646	1.41129	0.118474	0.280201	1	3351	tags=47%, list=16%, signal=55%
ODONNELL_TARGETS_OF_MYC_AND_TFRC_UP	ODONNELL_TARGETS_OF_MYC_AND_TFRC_UP		79	0.512755	1.41124	0.131313	0.279968	1	5310	tags=53%, list=26%, signal=71%
ONDER_CDH1_TARGETS_3_UP	ONDER_CDH1_TARGETS_3_UP		17	0.578767	1.41108	0.109312	0.279886	1	4972	tags=59%, list=24%, signal=78%
AMUNDSON_POOR_SURVIVAL_AFTER_GAMMA_RADIATION_2G	AMUNDSON_POOR_SURVIVAL_AFTER_GAMMA_RADIATION_2G		162	0.33181	1.41093	0.122568	0.279767	1	5000	tags=34%, list=24%, signal=45%
RAO_BOUND_BY_SALL4	RAO_BOUND_BY_SALL4		221	0.349296	1.40983	0.0371901	0.281015	1	4236	tags=30%, list=21%, signal=37%
REACTOME_RESPONSE_TO_ELEVATED_PLATELET_CYTOSOLIC_CA2_	REACTOME_RESPONSE_TO_ELEVATED_PLATELET_CYTOSOLIC_CA2_		79	0.46049	1.4097	0.0796813	0.28092	1	3489	tags=35%, list=17%, signal=43%
COLIN_PILOCYTIC_ASTROCYTOMA_VS_GLIOBLASTOMA_DN	COLIN_PILOCYTIC_ASTROCYTOMA_VS_GLIOBLASTOMA_DN		28	0.482046	1.40922	0.123288	0.281333	1	2571	tags=29%, list=13%, signal=33%
WINZEN_DEGRADED_VIA_KHSRP	WINZEN_DEGRADED_VIA_KHSRP		99	0.537248	1.40877	0.0707071	0.28169	1	3491	tags=36%, list=17%, signal=44%
BOYLAN_MULTIPLE_MYELOMA_PCA1_UP	BOYLAN_MULTIPLE_MYELOMA_PCA1_UP		99	0.521764	1.40874	0.0951456	0.281421	1	4694	tags=51%, list=23%, signal=65%
MCMURRAY_TP53_HRAS_COOPERATION_RESPONSE_DN	MCMURRAY_TP53_HRAS_COOPERATION_RESPONSE_DN		66	0.476044	1.40757	0.0517598	0.282759	1	2929	tags=32%, list=14%, signal=37%
PLASARI_TGFB1_SIGNALING_VIA_NFIC_10HR_UP	PLASARI_TGFB1_SIGNALING_VIA_NFIC_10HR_UP		53	0.531845	1.40746	0.0565657	0.282632	1	2440	tags=34%, list=12%, signal=38%
AIGNER_ZEB1_TARGETS	AIGNER_ZEB1_TARGETS		35	0.506446	1.40713	0.0891089	0.282789	1	3143	tags=34%, list=15%, signal=40%
BOHN_PRIMARY_IMMUNODEFICIENCY_SYNDROM_DN	BOHN_PRIMARY_IMMUNODEFICIENCY_SYNDROM_DN		40	0.487929	1.40588	0.136821	0.284436	1	3062	tags=35%, list=15%, signal=41%
KYNG_DNA_DAMAGE_BY_GAMMA_RADIATION	KYNG_DNA_DAMAGE_BY_GAMMA_RADIATION		79	0.426822	1.40548	0.0522088	0.284728	1	4943	tags=37%, list=24%, signal=48%
HOWLIN_PUBERTAL_MAMMARY_GLAND	HOWLIN_PUBERTAL_MAMMARY_GLAND		68	0.517937	1.4052	0.0813492	0.284788	1	2736	tags=37%, list=13%, signal=42%
ACEVEDO_LIVER_CANCER_WITH_H3K27ME3_UP	ACEVEDO_LIVER_CANCER_WITH_H3K27ME3_UP		276	0.46197	1.40497	0.0305499	0.284791	1	3010	tags=35%, list=15%, signal=40%
GROSS_HYPOXIA_VIA_ELK3_UP	GROSS_HYPOXIA_VIA_ELK3_UP		202	0.297129	1.40467	0.100775	0.284886	1	5590	tags=35%, list=27%, signal=47%
DAUER_STAT3_TARGETS_UP	DAUER_STAT3_TARGETS_UP		48	0.506294	1.40443	0.116959	0.284932	1	4171	tags=46%, list=20%, signal=57%
ELLWOOD_MYC_TARGETS_DN	ELLWOOD_MYC_TARGETS_DN		38	0.39251	1.40419	0.124528	0.284976	1	5836	tags=42%, list=28%, signal=59%
NAKAMURA_ADIPOGENESIS_EARLY_UP	NAKAMURA_ADIPOGENESIS_EARLY_UP		65	0.468234	1.40414	0.0725806	0.28473	1	3351	tags=34%, list=16%, signal=40%
LIAN_LIPA_TARGETS_6M	LIAN_LIPA_TARGETS_6M		73	0.56308	1.40411	0.0967118	0.284478	1	4187	tags=53%, list=20%, signal=67%
BOYAULT_LIVER_CANCER_SUBCLASS_G6_DN	BOYAULT_LIVER_CANCER_SUBCLASS_G6_DN		19	0.453806	1.40353	0.0959184	0.285022	1	5128	tags=42%, list=25%, signal=56%
THUM_SYSTOLIC_HEART_FAILURE_DN	THUM_SYSTOLIC_HEART_FAILURE_DN		223	0.339542	1.40328	0.0711382	0.285123	1	4038	tags=29%, list=20%, signal=35%
REACTOME_CREB_PHOSPHORYLATION_THROUGH_THE_ACTIVATION_OF_RAS	REACTOME_CREB_PHOSPHORYLATION_THROUGH_THE_ACTIVATION_OF_RAS		27	0.503349	1.40318	0.0833333	0.284933	1	2508	tags=26%, list=12%, signal=30%
LEE_METASTASIS_AND_ALTERNATIVE_SPLICING_UP	LEE_METASTASIS_AND_ALTERNATIVE_SPLICING_UP		74	0.431388	1.40227	0.0813492	0.286064	1	3944	tags=35%, list=19%, signal=43%
PID_ERBB2_ERBB3_PATHWAY	PID_ERBB2_ERBB3_PATHWAY		44	0.329016	1.40137	0.112903	0.287137	1	7656	tags=57%, list=37%, signal=90%
MCLACHLAN_DENTAL_CARIES_DN	MCLACHLAN_DENTAL_CARIES_DN		82	0.515477	1.4012	0.0874752	0.287101	1	2296	tags=28%, list=11%, signal=31%
TAKEDA_TARGETS_OF_NUP98_HOXA9_FUSION_8D_UP	TAKEDA_TARGETS_OF_NUP98_HOXA9_FUSION_8D_UP		152	0.486004	1.4009	0.0682261	0.287224	1	4156	tags=49%, list=20%, signal=61%
NIELSEN_LIPOSARCOMA_DN	NIELSEN_LIPOSARCOMA_DN		19	0.524971	1.40049	0.109375	0.287528	1	3010	tags=37%, list=15%, signal=43%
FONTAINE_FOLLICULAR_THYROID_ADENOMA_DN	FONTAINE_FOLLICULAR_THYROID_ADENOMA_DN		67	0.458619	1.40033	0.0976096	0.287439	1	2411	tags=25%, list=12%, signal=29%
BIOCARTA_FAS_PATHWAY	BIOCARTA_FAS_PATHWAY		30	0.380948	1.40028	0.133981	0.287209	1	6784	tags=50%, list=33%, signal=75%
SEITZ_NEOPLASTIC_TRANSFORMATION_BY_8P_DELETION_UP	SEITZ_NEOPLASTIC_TRANSFORMATION_BY_8P_DELETION_UP		73	0.562849	1.39989	0.10303	0.28752	1	3671	tags=49%, list=18%, signal=60%
QUINTENS_EMBRYONIC_BRAIN_RESPONSE_TO_IR	QUINTENS_EMBRYONIC_BRAIN_RESPONSE_TO_IR		80	0.36185	1.39963	0.0391753	0.287573	1	4083	tags=25%, list=20%, signal=31%
TAKEDA_TARGETS_OF_NUP98_HOXA9_FUSION_10D_UP	TAKEDA_TARGETS_OF_NUP98_HOXA9_FUSION_10D_UP		188	0.517103	1.39932	0.0882353	0.287699	1	4457	tags=51%, list=22%, signal=64%
MCBRYAN_PUBERTAL_BREAST_6_7WK_UP	MCBRYAN_PUBERTAL_BREAST_6_7WK_UP		192	0.334349	1.3992	0.115914	0.287589	1	4451	tags=31%, list=22%, signal=40%
GYORFFY_MITOXANTRONE_RESISTANCE	GYORFFY_MITOXANTRONE_RESISTANCE		53	0.464023	1.39772	0.0744467	0.289587	1	3299	tags=34%, list=16%, signal=40%
CHEN_LVAD_SUPPORT_OF_FAILING_HEART_UP	CHEN_LVAD_SUPPORT_OF_FAILING_HEART_UP		102	0.455853	1.39759	0.124752	0.289454	1	3818	tags=37%, list=19%, signal=46%
BIOCARTA_ERK5_PATHWAY	BIOCARTA_ERK5_PATHWAY		17	0.444124	1.39753	0.136273	0.289217	1	6762	tags=47%, list=33%, signal=70%
PID_AMB2_NEUTROPHILS_PATHWAY	PID_AMB2_NEUTROPHILS_PATHWAY		41	0.519779	1.3972	0.127451	0.28938	1	2622	tags=39%, list=13%, signal=45%
LEE_LIVER_CANCER_CIPROFIBRATE_UP	LEE_LIVER_CANCER_CIPROFIBRATE_UP		59	0.473377	1.39676	0.0760456	0.289701	1	5905	tags=59%, list=29%, signal=83%
LIU_TARGETS_OF_VMYB_VS_CMYB_UP	LIU_TARGETS_OF_VMYB_VS_CMYB_UP		19	0.521297	1.39623	0.0800821	0.290163	1	2536	tags=32%, list=12%, signal=36%
KEGG_GAP_JUNCTION	KEGG_GAP_JUNCTION		87	0.420144	1.39622	0.0740741	0.289884	1	4725	tags=37%, list=23%, signal=48%
HARRIS_HYPOXIA	HARRIS_HYPOXIA		81	0.435709	1.39618	0.104364	0.289646	1	4289	tags=36%, list=21%, signal=45%
PID_RHOA_PATHWAY	PID_RHOA_PATHWAY		45	0.365383	1.3954	0.101392	0.290518	1	6621	tags=49%, list=32%, signal=72%
WU_ALZHEIMER_DISEASE_DN	WU_ALZHEIMER_DISEASE_DN		19	0.544444	1.39436	0.0895238	0.291677	1	5230	tags=53%, list=26%, signal=71%
RIZ_ERYTHROID_DIFFERENTIATION_APOBEC2	RIZ_ERYTHROID_DIFFERENTIATION_APOBEC2		27	0.54734	1.39413	0.0752033	0.291725	1	1621	tags=33%, list=8%, signal=36%
KEGG_N_GLYCAN_BIOSYNTHESIS	KEGG_N_GLYCAN_BIOSYNTHESIS		46	0.332523	1.39345	0.12549	0.292447	1	2922	tags=17%, list=14%, signal=20%
REACTOME_HS_GAG_DEGRADATION	REACTOME_HS_GAG_DEGRADATION		20	0.510433	1.39315	0.10664	0.292531	1	4420	tags=45%, list=22%, signal=57%
REACTOME_METABOLISM_OF_CARBOHYDRATES	REACTOME_METABOLISM_OF_CARBOHYDRATES		234	0.351904	1.39083	0.0535714	0.295615	1	3022	tags=21%, list=15%, signal=24%
BIOCARTA_LAIR_PATHWAY	BIOCARTA_LAIR_PATHWAY		17	0.671298	1.39078	0.0991735	0.29537	1	4557	tags=65%, list=22%, signal=83%
OZEN_MIR125B1_TARGETS	OZEN_MIR125B1_TARGETS		25	0.360396	1.39042	0.101167	0.295611	1	5096	tags=40%, list=25%, signal=53%
CHANDRAN_METASTASIS_DN	CHANDRAN_METASTASIS_DN		295	0.431875	1.39026	0.0961924	0.295542	1	3573	tags=32%, list=17%, signal=38%
NADERI_BREAST_CANCER_PROGNOSIS_DN	NADERI_BREAST_CANCER_PROGNOSIS_DN		18	0.561109	1.39004	0.137795	0.295508	1	2658	tags=44%, list=13%, signal=51%
REACTOME_POST_NMDA_RECEPTOR_ACTIVATION_EVENTS	REACTOME_POST_NMDA_RECEPTOR_ACTIVATION_EVENTS		33	0.483247	1.39001	0.083004	0.295255	1	2508	tags=24%, list=12%, signal=28%
RAY_TARGETS_OF_P210_BCR_ABL_FUSION_UP	RAY_TARGETS_OF_P210_BCR_ABL_FUSION_UP		15	0.505155	1.38998	0.108216	0.294988	1	5108	tags=60%, list=25%, signal=80%
CHYLA_CBFA2T3_TARGETS_UP	CHYLA_CBFA2T3_TARGETS_UP		377	0.42736	1.38968	0.0866935	0.295125	1	3688	tags=32%, list=18%, signal=38%
BROWNE_HCMV_INFECTION_16HR_UP	BROWNE_HCMV_INFECTION_16HR_UP		222	0.308308	1.38906	0.0626263	0.295749	1	6886	tags=45%, list=34%, signal=67%
EPPERT_LSC_R	EPPERT_LSC_R		40	0.351741	1.38892	0.120079	0.29563	1	6496	tags=43%, list=32%, signal=62%
BROWNE_INTERFERON_RESPONSIVE_GENES	BROWNE_INTERFERON_RESPONSIVE_GENES		67	0.617384	1.38885	0.17004	0.295452	1	5560	tags=72%, list=27%, signal=98%
DELASERNA_MYOD_TARGETS_UP	DELASERNA_MYOD_TARGETS_UP		89	0.408468	1.38856	0.0658915	0.295606	1	3382	tags=28%, list=16%, signal=33%
MCCLUNG_DELTA_FOSB_TARGETS_8WK	MCCLUNG_DELTA_FOSB_TARGETS_8WK		46	0.450572	1.38541	0.0805785	0.299968	1	5920	tags=50%, list=29%, signal=70%
BIOCARTA_BAD_PATHWAY	BIOCARTA_BAD_PATHWAY		26	0.498815	1.38523	0.0961145	0.299944	1	5030	tags=46%, list=25%, signal=61%
STARK_HYPPOCAMPUS_22Q11_DELETION_UP	STARK_HYPPOCAMPUS_22Q11_DELETION_UP		50	0.409932	1.38505	0.0969072	0.29992	1	3653	tags=28%, list=18%, signal=34%
REACTOME_SIGNALING_BY_FGFR_IN_DISEASE	REACTOME_SIGNALING_BY_FGFR_IN_DISEASE		121	0.342731	1.38487	0.0988142	0.299881	1	5405	tags=35%, list=26%, signal=47%
SCHRAETS_MLL_TARGETS_UP	SCHRAETS_MLL_TARGETS_UP		34	0.524537	1.38456	0.0873016	0.300066	1	3414	tags=41%, list=17%, signal=49%
MAHAJAN_RESPONSE_TO_IL1A_UP	MAHAJAN_RESPONSE_TO_IL1A_UP		81	0.477073	1.38426	0.0817121	0.300241	1	3990	tags=38%, list=19%, signal=47%
HOELZEL_NF1_TARGETS_DN	HOELZEL_NF1_TARGETS_DN		111	0.50649	1.38357	0.0959184	0.301038	1	3119	tags=40%, list=15%, signal=46%
SCHEIDEREIT_IKK_TARGETS	SCHEIDEREIT_IKK_TARGETS		17	0.475524	1.38336	0.130785	0.301063	1	4808	tags=47%, list=23%, signal=61%
DITTMER_PTHLH_TARGETS_DN	DITTMER_PTHLH_TARGETS_DN		73	0.306989	1.38316	0.132184	0.30106	1	5953	tags=38%, list=29%, signal=54%
ST_WNT_BETA_CATENIN_PATHWAY	ST_WNT_BETA_CATENIN_PATHWAY		34	0.475452	1.38292	0.116505	0.301136	1	3535	tags=41%, list=17%, signal=50%
SAKAI_TUMOR_INFILTRATING_MONOCYTES_UP	SAKAI_TUMOR_INFILTRATING_MONOCYTES_UP		27	0.474085	1.38271	0.101562	0.301159	1	4745	tags=41%, list=23%, signal=53%
PID_ARF6_DOWNSTREAM_PATHWAY	PID_ARF6_DOWNSTREAM_PATHWAY		15	0.41689	1.38271	0.11619	0.300867	1	6564	tags=40%, list=32%, signal=59%
GAUSSMANN_MLL_AF4_FUSION_TARGETS_C_DN	GAUSSMANN_MLL_AF4_FUSION_TARGETS_C_DN		19	0.572553	1.38215	0.0833333	0.301368	1	2044	tags=32%, list=10%, signal=35%
ZHANG_PROLIFERATING_VS_QUIESCENT	ZHANG_PROLIFERATING_VS_QUIESCENT		51	0.363487	1.38205	0.136194	0.301232	1	3285	tags=24%, list=16%, signal=28%
REACTOME_DOWNSTREAM_SIGNALING_OF_ACTIVATED_FGFR	REACTOME_DOWNSTREAM_SIGNALING_OF_ACTIVATED_FGFR		97	0.378064	1.38184	0.086	0.30124	1	4725	tags=34%, list=23%, signal=44%
GEISS_RESPONSE_TO_DSRNA_DN	GEISS_RESPONSE_TO_DSRNA_DN		16	0.533159	1.38031	0.106212	0.303262	1	3668	tags=38%, list=18%, signal=46%
PID_WNT_SIGNALING_PATHWAY	PID_WNT_SIGNALING_PATHWAY		28	0.533266	1.38018	0.0848126	0.303125	1	3670	tags=39%, list=18%, signal=48%
ST_GRANULE_CELL_SURVIVAL_PATHWAY	ST_GRANULE_CELL_SURVIVAL_PATHWAY		27	0.43598	1.37989	0.117063	0.303254	1	6109	tags=59%, list=30%, signal=84%
PID_KIT_PATHWAY	PID_KIT_PATHWAY		52	0.413794	1.37984	0.137931	0.303025	1	6114	tags=54%, list=30%, signal=77%
PID_MAPK_TRK_PATHWAY	PID_MAPK_TRK_PATHWAY		34	0.336899	1.37974	0.112205	0.302875	1	6564	tags=44%, list=32%, signal=65%
APPEL_IMATINIB_RESPONSE	APPEL_IMATINIB_RESPONSE		33	0.513769	1.37901	0.162476	0.303633	1	4187	tags=36%, list=20%, signal=46%
REACTOME_GPVI_MEDIATED_ACTIVATION_CASCADE	REACTOME_GPVI_MEDIATED_ACTIVATION_CASCADE		31	0.540697	1.37895	0.194779	0.303428	1	5153	tags=45%, list=25%, signal=60%
TING_SILENCED_BY_DICER	TING_SILENCED_BY_DICER		30	0.541669	1.37884	0.0934959	0.303284	1	4801	tags=63%, list=23%, signal=83%
APRELIKOVA_BRCA1_TARGETS	APRELIKOVA_BRCA1_TARGETS		49	0.396556	1.37882	0.105263	0.302991	1	3697	tags=31%, list=18%, signal=37%
LIN_MELANOMA_COPY_NUMBER_UP	LIN_MELANOMA_COPY_NUMBER_UP		68	0.351203	1.37855	0.105155	0.303116	1	2105	tags=13%, list=10%, signal=15%
GUTIERREZ_CHRONIC_LYMPHOCYTIC_LEUKEMIA_DN	GUTIERREZ_CHRONIC_LYMPHOCYTIC_LEUKEMIA_DN		54	0.474239	1.37808	0.110891	0.303517	1	3914	tags=41%, list=19%, signal=50%
BIOCARTA_AKAPCENTROSOME_PATHWAY	BIOCARTA_AKAPCENTROSOME_PATHWAY		15	0.494606	1.37777	0.104294	0.30372	1	5153	tags=40%, list=25%, signal=53%
PARK_HSC_VS_MULTIPOTENT_PROGENITORS_UP	PARK_HSC_VS_MULTIPOTENT_PROGENITORS_UP		19	0.386792	1.37759	0.134021	0.303677	1	5302	tags=37%, list=26%, signal=50%
BROWNE_HCMV_INFECTION_30MIN_DN	BROWNE_HCMV_INFECTION_30MIN_DN		149	0.384237	1.37705	0.0543689	0.304216	1	4304	tags=33%, list=21%, signal=41%
KARAKAS_TGFB1_SIGNALING	KARAKAS_TGFB1_SIGNALING		18	0.609232	1.37666	0.123016	0.304513	1	3286	tags=44%, list=16%, signal=53%
PID_NOTCH_PATHWAY	PID_NOTCH_PATHWAY		59	0.354448	1.3765	0.103718	0.304408	1	5851	tags=41%, list=29%, signal=57%
YAGI_AML_WITH_11Q23_REARRANGED	YAGI_AML_WITH_11Q23_REARRANGED		344	0.313299	1.37629	0.0954274	0.304441	1	5740	tags=35%, list=28%, signal=48%
PANGAS_TUMOR_SUPPRESSION_BY_SMAD1_AND_SMAD5_DN	PANGAS_TUMOR_SUPPRESSION_BY_SMAD1_AND_SMAD5_DN		152	0.328251	1.37621	0.061657	0.30424	1	5224	tags=34%, list=25%, signal=46%
DING_LUNG_CANCER_MUTATED_SIGNIFICANTLY	DING_LUNG_CANCER_MUTATED_SIGNIFICANTLY		26	0.530978	1.37541	0.0862745	0.305134	1	3504	tags=42%, list=17%, signal=51%
ZHENG_RESPONSE_TO_ARSENITE_DN	ZHENG_RESPONSE_TO_ARSENITE_DN		17	0.541093	1.37507	0.118217	0.305319	1	1550	tags=24%, list=8%, signal=25%
BIOCARTA_VIP_PATHWAY	BIOCARTA_VIP_PATHWAY		26	0.467542	1.37462	0.122807	0.30573	1	4725	tags=38%, list=23%, signal=50%
BIOCARTA_IGF1R_PATHWAY	BIOCARTA_IGF1R_PATHWAY		23	0.426802	1.37456	0.135189	0.305501	1	5030	tags=39%, list=25%, signal=52%
HERNANDEZ_MITOTIC_ARREST_BY_DOCETAXEL_2_UP	HERNANDEZ_MITOTIC_ARREST_BY_DOCETAXEL_2_UP		62	0.43818	1.37443	0.0974155	0.305361	1	2584	tags=29%, list=13%, signal=33%
BIOCARTA_ERYTH_PATHWAY	BIOCARTA_ERYTH_PATHWAY		15	0.624378	1.37373	0.103175	0.306129	1	2235	tags=47%, list=11%, signal=52%
REACTOME_NUCLEOTIDE_LIKE_PURINERGIC_RECEPTORS	REACTOME_NUCLEOTIDE_LIKE_PURINERGIC_RECEPTORS		16	0.658642	1.37312	0.097166	0.30672	1	1319	tags=31%, list=6%, signal=33%
MULLIGHAN_MLL_SIGNATURE_2_DN	MULLIGHAN_MLL_SIGNATURE_2_DN		273	0.362333	1.3722	0.0997963	0.307694	1	4846	tags=33%, list=24%, signal=42%
JACKSON_DNMT1_TARGETS_DN	JACKSON_DNMT1_TARGETS_DN		25	0.511952	1.37148	0.141732	0.308481	1	1045	tags=20%, list=5%, signal=21%
REACTOME_PTM_GAMMA_CARBOXYLATION_HYPUSINE_FORMATION_AND_ARYLSULFATASE_ACTIVATION	REACTOME_PTM_GAMMA_CARBOXYLATION_HYPUSINE_FORMATION_AND_ARYLSULFATASE_ACTIVATION		26	0.516379	1.36986	0.10099	0.310691	1	3017	tags=38%, list=15%, signal=45%
BIOCARTA_ALK_PATHWAY	BIOCARTA_ALK_PATHWAY		36	0.464883	1.36939	0.0925197	0.311062	1	6629	tags=69%, list=32%, signal=102%
THEILGAARD_NEUTROPHIL_AT_SKIN_WOUND_DN	THEILGAARD_NEUTROPHIL_AT_SKIN_WOUND_DN		223	0.291017	1.36899	0.177734	0.311328	1	6573	tags=42%, list=32%, signal=61%
MARKEY_RB1_ACUTE_LOF_DN	MARKEY_RB1_ACUTE_LOF_DN		219	0.473545	1.36789	0.143701	0.31271	1	5284	tags=46%, list=26%, signal=61%
CHIARADONNA_NEOPLASTIC_TRANSFORMATION_CDC25_DN	CHIARADONNA_NEOPLASTIC_TRANSFORMATION_CDC25_DN		153	0.350077	1.36772	0.100971	0.312657	1	4349	tags=28%, list=21%, signal=35%
SA_B_CELL_RECEPTOR_COMPLEXES	SA_B_CELL_RECEPTOR_COMPLEXES		24	0.40918	1.367	0.144	0.313448	1	4452	tags=25%, list=22%, signal=32%
REACTOME_CYTOKINE_SIGNALING_IN_IMMUNE_SYSTEM	REACTOME_CYTOKINE_SIGNALING_IN_IMMUNE_SYSTEM		251	0.398494	1.36682	0.153846	0.313421	1	5930	tags=42%, list=29%, signal=58%
FRASOR_RESPONSE_TO_SERM_OR_FULVESTRANT_UP	FRASOR_RESPONSE_TO_SERM_OR_FULVESTRANT_UP		22	0.465299	1.36621	0.116466	0.314046	1	5482	tags=55%, list=27%, signal=74%
ASTON_MAJOR_DEPRESSIVE_DISORDER_UP	ASTON_MAJOR_DEPRESSIVE_DISORDER_UP		48	0.440008	1.36606	0.108317	0.313951	1	3531	tags=35%, list=17%, signal=43%
BOSCO_ALLERGEN_INDUCED_TH2_ASSOCIATED_MODULE	BOSCO_ALLERGEN_INDUCED_TH2_ASSOCIATED_MODULE		144	0.464572	1.36589	0.132924	0.313866	1	4516	tags=37%, list=22%, signal=47%
LABBE_TARGETS_OF_TGFB1_AND_WNT3A_DN	LABBE_TARGETS_OF_TGFB1_AND_WNT3A_DN		107	0.404297	1.36583	0.0416667	0.313625	1	4563	tags=36%, list=22%, signal=47%
SCHAEFFER_SOX9_TARGETS_IN_PROSTATE_DEVELOPMENT_DN	SCHAEFFER_SOX9_TARGETS_IN_PROSTATE_DEVELOPMENT_DN		44	0.457445	1.36561	0.131524	0.313638	1	3039	tags=30%, list=15%, signal=35%
MYLLYKANGAS_AMPLIFICATION_HOT_SPOT_23	MYLLYKANGAS_AMPLIFICATION_HOT_SPOT_23		19	0.492412	1.36544	0.149105	0.313574	1	5605	tags=58%, list=27%, signal=80%
RODRIGUES_NTN1_TARGETS_UP	RODRIGUES_NTN1_TARGETS_UP		16	0.59944	1.3652	0.0922131	0.31358	1	2917	tags=44%, list=14%, signal=51%
ZHAN_MULTIPLE_MYELOMA_PR_DN	ZHAN_MULTIPLE_MYELOMA_PR_DN		43	0.480325	1.36493	0.134172	0.313703	1	4674	tags=47%, list=23%, signal=60%
KYNG_DNA_DAMAGE_BY_4NQO	KYNG_DNA_DAMAGE_BY_4NQO		37	0.405131	1.36463	0.102564	0.313878	1	4605	tags=38%, list=22%, signal=49%
CHUNG_BLISTER_CYTOTOXICITY_DN	CHUNG_BLISTER_CYTOTOXICITY_DN		43	0.48693	1.36428	0.149901	0.31417	1	5719	tags=56%, list=28%, signal=77%
WEST_ADRENOCORTICAL_TUMOR_MARKERS_DN	WEST_ADRENOCORTICAL_TUMOR_MARKERS_DN		20	0.628035	1.36423	0.125984	0.313935	1	2658	tags=45%, list=13%, signal=52%
KEGG_VIRAL_MYOCARDITIS	KEGG_VIRAL_MYOCARDITIS		50	0.516783	1.36401	0.115464	0.313961	1	5562	tags=56%, list=27%, signal=77%
REACTOME_PKA_MEDIATED_PHOSPHORYLATION_OF_CREB	REACTOME_PKA_MEDIATED_PHOSPHORYLATION_OF_CREB		17	0.536634	1.36371	0.126819	0.314093	1	5030	tags=65%, list=25%, signal=86%
REACTOME_CD28_CO_STIMULATION	REACTOME_CD28_CO_STIMULATION		31	0.476889	1.36343	0.195609	0.314222	1	4664	tags=32%, list=23%, signal=42%
PID_THROMBIN_PAR4_PATHWAY	PID_THROMBIN_PAR4_PATHWAY		15	0.560629	1.36314	0.110887	0.314344	1	3357	tags=47%, list=16%, signal=56%
REACTOME_CD28_DEPENDENT_PI3K_AKT_SIGNALING	REACTOME_CD28_DEPENDENT_PI3K_AKT_SIGNALING		21	0.50885	1.36305	0.175869	0.314172	1	4664	tags=33%, list=23%, signal=43%
RAO_BOUND_BY_SALL4_ISOFORM_A	RAO_BOUND_BY_SALL4_ISOFORM_A		177	0.366456	1.36247	0.0460922	0.31471	1	4017	tags=31%, list=20%, signal=38%
REACTOME_SIGNALING_BY_ERBB2	REACTOME_SIGNALING_BY_ERBB2		97	0.324316	1.36244	0.103448	0.314479	1	5231	tags=34%, list=26%, signal=45%
KEGG_COMPLEMENT_AND_COAGULATION_CASCADES	KEGG_COMPLEMENT_AND_COAGULATION_CASCADES		68	0.50738	1.36209	0.0802348	0.314671	1	3560	tags=44%, list=17%, signal=53%
KARLSSON_TGFB1_TARGETS_UP	KARLSSON_TGFB1_TARGETS_UP		125	0.31267	1.36186	0.175299	0.314706	1	2032	tags=13%, list=10%, signal=14%
XU_HGF_SIGNALING_NOT_VIA_AKT1_48HR_UP	XU_HGF_SIGNALING_NOT_VIA_AKT1_48HR_UP		35	0.436123	1.36156	0.131274	0.314884	1	1110	tags=17%, list=5%, signal=18%
ROESSLER_LIVER_CANCER_METASTASIS_DN	ROESSLER_LIVER_CANCER_METASTASIS_DN		49	0.311735	1.36145	0.106472	0.314756	1	4104	tags=22%, list=20%, signal=28%
SCHAEFFER_PROSTATE_DEVELOPMENT_AND_CANCER_BOX1_UP	SCHAEFFER_PROSTATE_DEVELOPMENT_AND_CANCER_BOX1_UP		15	0.400344	1.36128	0.129921	0.314702	1	8850	tags=80%, list=43%, signal=141%
COLLIS_PRKDC_REGULATORS	COLLIS_PRKDC_REGULATORS		15	0.400812	1.36069	0.107784	0.315243	1	5655	tags=40%, list=28%, signal=55%
KIM_WT1_TARGETS_8HR_DN	KIM_WT1_TARGETS_8HR_DN		126	0.3434	1.36028	0.0670498	0.315644	1	3868	tags=27%, list=19%, signal=33%
GARGALOVIC_RESPONSE_TO_OXIDIZED_PHOSPHOLIPIDS_YELLOW_DN	GARGALOVIC_RESPONSE_TO_OXIDIZED_PHOSPHOLIPIDS_YELLOW_DN		23	0.367204	1.3599	0.123106	0.315931	1	3119	tags=22%, list=15%, signal=26%
MATTIOLI_MULTIPLE_MYELOMA_WITH_14Q32_TRANSLOCATIONS	MATTIOLI_MULTIPLE_MYELOMA_WITH_14Q32_TRANSLOCATIONS		36	0.481983	1.35915	0.154309	0.316749	1	4459	tags=47%, list=22%, signal=60%
AFFAR_YY1_TARGETS_DN	AFFAR_YY1_TARGETS_DN		229	0.410793	1.35886	0.0873786	0.316885	1	2276	tags=20%, list=11%, signal=22%
NIELSEN_SYNOVIAL_SARCOMA_DN	NIELSEN_SYNOVIAL_SARCOMA_DN		19	0.601196	1.35883	0.200393	0.31661	1	6012	tags=74%, list=29%, signal=104%
ZHANG_BREAST_CANCER_PROGENITORS_DN	ZHANG_BREAST_CANCER_PROGENITORS_DN		142	0.271383	1.35819	0.0742188	0.317331	1	3165	tags=16%, list=15%, signal=19%
MCDOWELL_ACUTE_LUNG_INJURY_DN	MCDOWELL_ACUTE_LUNG_INJURY_DN		46	0.453084	1.35801	0.0977131	0.317311	1	3242	tags=35%, list=16%, signal=41%
PETRETTO_HEART_MASS_QTL_CIS_DN	PETRETTO_HEART_MASS_QTL_CIS_DN		22	0.365917	1.35792	0.111789	0.31714	1	2405	tags=23%, list=12%, signal=26%
WHITFIELD_CELL_CYCLE_M_G1	WHITFIELD_CELL_CYCLE_M_G1		137	0.252838	1.35763	0.158954	0.317268	1	4492	tags=24%, list=22%, signal=31%
BIOCARTA_FCER1_PATHWAY	BIOCARTA_FCER1_PATHWAY		38	0.450337	1.35685	0.177778	0.318249	1	6886	tags=47%, list=34%, signal=71%
GROSS_ELK3_TARGETS_UP	GROSS_ELK3_TARGETS_UP		27	0.478895	1.35649	0.133981	0.318489	1	4159	tags=48%, list=20%, signal=60%
WANG_CLIM2_TARGETS_UP	WANG_CLIM2_TARGETS_UP		247	0.281913	1.35645	0.0563674	0.318249	1	5177	tags=31%, list=25%, signal=41%
BIOCARTA_IL1R_PATHWAY	BIOCARTA_IL1R_PATHWAY		33	0.470776	1.35644	0.163148	0.317948	1	3649	tags=33%, list=18%, signal=40%
VILIMAS_NOTCH1_TARGETS_DN	VILIMAS_NOTCH1_TARGETS_DN		20	0.654489	1.35533	0.134653	0.319331	1	5383	tags=75%, list=26%, signal=102%
SEKI_INFLAMMATORY_RESPONSE_LPS_UP	SEKI_INFLAMMATORY_RESPONSE_LPS_UP		76	0.526079	1.35527	0.156942	0.319115	1	2947	tags=34%, list=14%, signal=40%
TONKS_TARGETS_OF_RUNX1_RUNX1T1_FUSION_GRANULOCYTE_DN	TONKS_TARGETS_OF_RUNX1_RUNX1T1_FUSION_GRANULOCYTE_DN		17	0.633013	1.3552	0.138	0.318902	1	4595	tags=65%, list=22%, signal=83%
BIOCARTA_SPRY_PATHWAY	BIOCARTA_SPRY_PATHWAY		18	0.458007	1.35419	0.15879	0.3201	1	4754	tags=39%, list=23%, signal=51%
IVANOVA_HEMATOPOIESIS_STEM_CELL	IVANOVA_HEMATOPOIESIS_STEM_CELL		244	0.354575	1.35413	0.0741483	0.319874	1	3441	tags=24%, list=17%, signal=28%
PEDRIOLI_MIR31_TARGETS_DN	PEDRIOLI_MIR31_TARGETS_DN		398	0.401073	1.3533	0.0803213	0.320811	1	4038	tags=34%, list=20%, signal=42%
REACTOME_MYD88_MAL_CASCADE_INITIATED_ON_PLASMA_MEMBRANE	REACTOME_MYD88_MAL_CASCADE_INITIATED_ON_PLASMA_MEMBRANE		80	0.332011	1.35261	0.162162	0.321538	1	6564	tags=45%, list=32%, signal=66%
PID_WNT_CANONICAL_PATHWAY	PID_WNT_CANONICAL_PATHWAY		20	0.409483	1.35221	0.143149	0.321858	1	6472	tags=55%, list=32%, signal=80%
EINAV_INTERFERON_SIGNATURE_IN_CANCER	EINAV_INTERFERON_SIGNATURE_IN_CANCER		27	0.637324	1.35182	0.191268	0.322199	1	5578	tags=74%, list=27%, signal=102%
BOYLAN_MULTIPLE_MYELOMA_PCA3_UP	BOYLAN_MULTIPLE_MYELOMA_PCA3_UP		76	0.413516	1.35175	0.054326	0.322001	1	5010	tags=47%, list=24%, signal=62%
BACOLOD_RESISTANCE_TO_ALKYLATING_AGENTS_UP	BACOLOD_RESISTANCE_TO_ALKYLATING_AGENTS_UP		25	0.532233	1.35152	0.126459	0.322017	1	3092	tags=40%, list=15%, signal=47%
DIRMEIER_LMP1_RESPONSE_LATE_UP	DIRMEIER_LMP1_RESPONSE_LATE_UP		56	0.400892	1.35146	0.180747	0.321823	1	5597	tags=43%, list=27%, signal=59%
ZHANG_RESPONSE_TO_IKK_INHIBITOR_AND_TNF_DN	ZHANG_RESPONSE_TO_IKK_INHIBITOR_AND_TNF_DN		98	0.334648	1.3512	0.0841683	0.321902	1	4341	tags=28%, list=21%, signal=35%
SHEDDEN_LUNG_CANCER_GOOD_SURVIVAL_A4	SHEDDEN_LUNG_CANCER_GOOD_SURVIVAL_A4		192	0.364023	1.35115	0.0763209	0.321658	1	4978	tags=38%, list=24%, signal=50%
AMIT_EGF_RESPONSE_60_HELA	AMIT_EGF_RESPONSE_60_HELA		45	0.413202	1.35104	0.162933	0.321516	1	6086	tags=49%, list=30%, signal=69%
PID_ER_NONGENOMIC_PATHWAY	PID_ER_NONGENOMIC_PATHWAY		41	0.412434	1.35094	0.125737	0.321371	1	5233	tags=41%, list=26%, signal=56%
BOYAULT_LIVER_CANCER_SUBCLASS_G5_DN	BOYAULT_LIVER_CANCER_SUBCLASS_G5_DN		25	0.585082	1.35087	0.181087	0.32118	1	3678	tags=56%, list=18%, signal=68%
AMUNDSON_RESPONSE_TO_ARSENITE	AMUNDSON_RESPONSE_TO_ARSENITE		215	0.283221	1.35069	0.118952	0.321123	1	6151	tags=37%, list=30%, signal=52%
BOYAULT_LIVER_CANCER_SUBCLASS_G6_UP	BOYAULT_LIVER_CANCER_SUBCLASS_G6_UP		64	0.375495	1.35015	0.0790021	0.321636	1	3311	tags=27%, list=16%, signal=32%
MCBRYAN_PUBERTAL_BREAST_5_6WK_UP	MCBRYAN_PUBERTAL_BREAST_5_6WK_UP		114	0.359865	1.3497	0.103113	0.32199	1	2915	tags=23%, list=14%, signal=26%
DAVICIONI_TARGETS_OF_PAX_FOXO1_FUSIONS_DN	DAVICIONI_TARGETS_OF_PAX_FOXO1_FUSIONS_DN		66	0.458807	1.34966	0.0740741	0.321748	1	4287	tags=41%, list=21%, signal=52%
ZHAN_MULTIPLE_MYELOMA_MF_UP	ZHAN_MULTIPLE_MYELOMA_MF_UP		45	0.464738	1.34948	0.105368	0.321715	1	1159	tags=24%, list=6%, signal=26%
HERNANDEZ_MITOTIC_ARREST_BY_DOCETAXEL_1_DN	HERNANDEZ_MITOTIC_ARREST_BY_DOCETAXEL_1_DN		37	0.459301	1.34943	0.126679	0.32149	1	2290	tags=27%, list=11%, signal=30%
TONKS_TARGETS_OF_RUNX1_RUNX1T1_FUSION_SUSTAINED_IN_MONOCYTE_UP	TONKS_TARGETS_OF_RUNX1_RUNX1T1_FUSION_SUSTAINED_IN_MONOCYTE_UP		21	0.546941	1.34908	0.115768	0.321658	1	2736	tags=33%, list=13%, signal=38%
ZHENG_FOXP3_TARGETS_UP	ZHENG_FOXP3_TARGETS_UP		26	0.516692	1.34874	0.175889	0.321892	1	6773	tags=62%, list=33%, signal=92%
REACTOME_SIGNALING_BY_FGFR	REACTOME_SIGNALING_BY_FGFR		108	0.355856	1.34868	0.115152	0.321672	1	4725	tags=31%, list=23%, signal=41%
NAKAYAMA_FRA2_TARGETS	NAKAYAMA_FRA2_TARGETS		42	0.406205	1.34852	0.142857	0.32162	1	3740	tags=31%, list=18%, signal=38%
PLASARI_NFIC_TARGETS_BASAL_DN	PLASARI_NFIC_TARGETS_BASAL_DN		18	0.632971	1.34834	0.126984	0.321577	1	2142	tags=44%, list=10%, signal=50%
VALK_AML_CLUSTER_13	VALK_AML_CLUSTER_13		30	0.486542	1.3478	0.10757	0.322095	1	5104	tags=53%, list=25%, signal=71%
REACTOME_INTERFERON_GAMMA_SIGNALING	REACTOME_INTERFERON_GAMMA_SIGNALING		48	0.554503	1.34736	0.164969	0.322472	1	5850	tags=60%, list=29%, signal=84%
KENNY_CTNNB1_TARGETS_UP	KENNY_CTNNB1_TARGETS_UP		49	0.398549	1.34701	0.162476	0.322732	1	2743	tags=22%, list=13%, signal=26%
LENAOUR_DENDRITIC_CELL_MATURATION_DN	LENAOUR_DENDRITIC_CELL_MATURATION_DN		127	0.47759	1.34676	0.153242	0.322811	1	4712	tags=42%, list=23%, signal=54%
HEIDENBLAD_AMPLICON_8Q24_DN	HEIDENBLAD_AMPLICON_8Q24_DN		43	0.349794	1.34655	0.135294	0.322823	1	4330	tags=28%, list=21%, signal=35%
PID_ERBB4_PATHWAY	PID_ERBB4_PATHWAY		38	0.412362	1.34649	0.0818363	0.322636	1	5335	tags=53%, list=26%, signal=71%
KORKOLA_EMBRYONIC_CARCINOMA_VS_SEMINOMA_UP	KORKOLA_EMBRYONIC_CARCINOMA_VS_SEMINOMA_UP		22	0.537108	1.34588	0.0846774	0.32327	1	2578	tags=32%, list=13%, signal=36%
VANHARANTA_UTERINE_FIBROID_DN	VANHARANTA_UTERINE_FIBROID_DN		67	0.487464	1.34508	0.161417	0.324212	1	4501	tags=46%, list=22%, signal=59%
CAVARD_LIVER_CANCER_MALIGNANT_VS_BENIGN	CAVARD_LIVER_CANCER_MALIGNANT_VS_BENIGN		30	0.514269	1.34493	0.108871	0.324131	1	3634	tags=33%, list=18%, signal=40%
NAKAJIMA_MAST_CELL	NAKAJIMA_MAST_CELL		46	0.522433	1.34381	0.130522	0.325605	1	4806	tags=43%, list=23%, signal=57%
BIOCARTA_NFAT_PATHWAY	BIOCARTA_NFAT_PATHWAY		52	0.424091	1.34371	0.105159	0.325447	1	4725	tags=37%, list=23%, signal=47%
REACTOME_DAG_AND_IP3_SIGNALING	REACTOME_DAG_AND_IP3_SIGNALING		31	0.474918	1.34356	0.155556	0.325386	1	5030	tags=48%, list=25%, signal=64%
SEKI_INFLAMMATORY_RESPONSE_LPS_DN	SEKI_INFLAMMATORY_RESPONSE_LPS_DN		23	0.56774	1.34355	0.126789	0.32511	1	3004	tags=35%, list=15%, signal=41%
WNT_SIGNALING	WNT_SIGNALING		89	0.405905	1.34335	0.105691	0.325134	1	3653	tags=31%, list=18%, signal=38%
REACTOME_CHONDROITIN_SULFATE_BIOSYNTHESIS	REACTOME_CHONDROITIN_SULFATE_BIOSYNTHESIS		19	0.551068	1.3433	0.139442	0.324902	1	3021	tags=53%, list=15%, signal=62%
REACTOME_IL1_SIGNALING	REACTOME_IL1_SIGNALING		38	0.40967	1.34304	0.150794	0.325015	1	5579	tags=39%, list=27%, signal=54%
GERY_CEBP_TARGETS	GERY_CEBP_TARGETS		125	0.412609	1.34261	0.118236	0.325383	1	3269	tags=26%, list=16%, signal=30%
KIM_MYC_AMPLIFICATION_TARGETS_DN	KIM_MYC_AMPLIFICATION_TARGETS_DN		95	0.395653	1.34249	0.102784	0.325256	1	4849	tags=41%, list=24%, signal=54%
NGUYEN_NOTCH1_TARGETS_UP	NGUYEN_NOTCH1_TARGETS_UP		29	0.421861	1.3416	0.111776	0.326264	1	3286	tags=34%, list=16%, signal=41%
BIOCARTA_CARDIACEGF_PATHWAY	BIOCARTA_CARDIACEGF_PATHWAY		18	0.571649	1.34149	0.129666	0.326105	1	1257	tags=22%, list=6%, signal=24%
REACTOME_CA_DEPENDENT_EVENTS	REACTOME_CA_DEPENDENT_EVENTS		29	0.491293	1.34139	0.147705	0.325946	1	5030	tags=52%, list=25%, signal=68%
DORN_ADENOVIRUS_INFECTION_24HR_DN	DORN_ADENOVIRUS_INFECTION_24HR_DN		41	0.410763	1.34115	0.170297	0.326034	1	6373	tags=41%, list=31%, signal=60%
REACTOME_INNATE_IMMUNE_SYSTEM	REACTOME_INNATE_IMMUNE_SYSTEM		259	0.371113	1.34074	0.173307	0.326381	1	5225	tags=35%, list=25%, signal=46%
PID_A6B1_A6B4_INTEGRIN_PATHWAY	PID_A6B1_A6B4_INTEGRIN_PATHWAY		46	0.442827	1.34045	0.163636	0.326533	1	4876	tags=39%, list=24%, signal=51%
GAVIN_PDE3B_TARGETS	GAVIN_PDE3B_TARGETS		22	0.641059	1.33985	0.167677	0.327062	1	2072	tags=45%, list=10%, signal=51%
DIAZ_CHRONIC_MEYLOGENOUS_LEUKEMIA_DN	DIAZ_CHRONIC_MEYLOGENOUS_LEUKEMIA_DN		113	0.468314	1.33919	0.187135	0.32772	1	5439	tags=54%, list=27%, signal=73%
RUTELLA_RESPONSE_TO_HGF_VS_CSF2RB_AND_IL4_DN	RUTELLA_RESPONSE_TO_HGF_VS_CSF2RB_AND_IL4_DN		239	0.361494	1.33909	0.168986	0.327542	1	5053	tags=31%, list=25%, signal=41%
POOLA_INVASIVE_BREAST_CANCER_UP	POOLA_INVASIVE_BREAST_CANCER_UP		272	0.562269	1.33908	0.186312	0.327269	1	3134	tags=40%, list=15%, signal=47%
COATES_MACROPHAGE_M1_VS_M2_DN	COATES_MACROPHAGE_M1_VS_M2_DN		77	0.39764	1.33862	0.0836653	0.327725	1	3259	tags=30%, list=16%, signal=35%
BIOCARTA_HIVNEF_PATHWAY	BIOCARTA_HIVNEF_PATHWAY		58	0.311	1.3386	0.173653	0.327445	1	7139	tags=47%, list=35%, signal=71%
BIOCARTA_EDG1_PATHWAY	BIOCARTA_EDG1_PATHWAY		27	0.491838	1.33825	0.142857	0.327702	1	1361	tags=22%, list=7%, signal=24%
CROONQUIST_IL6_DEPRIVATION_UP	CROONQUIST_IL6_DEPRIVATION_UP		20	0.55869	1.33722	0.155378	0.328967	1	3430	tags=50%, list=17%, signal=60%
PODAR_RESPONSE_TO_ADAPHOSTIN_DN	PODAR_RESPONSE_TO_ADAPHOSTIN_DN		17	0.512973	1.33663	0.131679	0.329569	1	4055	tags=41%, list=20%, signal=51%
HU_GENOTOXIN_ACTION_DIRECT_VS_INDIRECT_4HR	HU_GENOTOXIN_ACTION_DIRECT_VS_INDIRECT_4HR		37	0.394282	1.33527	0.155206	0.331339	1	2814	tags=24%, list=14%, signal=28%
KRASNOSELSKAYA_ILF3_TARGETS_DN	KRASNOSELSKAYA_ILF3_TARGETS_DN		45	0.444769	1.33491	0.123552	0.3316	1	2602	tags=31%, list=13%, signal=36%
ZHOU_INFLAMMATORY_RESPONSE_LIVE_UP	ZHOU_INFLAMMATORY_RESPONSE_LIVE_UP		446	0.384308	1.33435	0.0677618	0.332234	1	3619	tags=29%, list=18%, signal=34%
CUI_TCF21_TARGETS_2_UP	CUI_TCF21_TARGETS_2_UP		421	0.363883	1.3342	0.0984252	0.332144	1	2429	tags=20%, list=12%, signal=22%
MOSERLE_IFNA_RESPONSE	MOSERLE_IFNA_RESPONSE		31	0.722957	1.33351	0.190871	0.332937	1	5427	tags=94%, list=26%, signal=127%
YORDY_RECIPROCAL_REGULATION_BY_ETS1_AND_SP100_DN	YORDY_RECIPROCAL_REGULATION_BY_ETS1_AND_SP100_DN		83	0.413633	1.3333	0.1002	0.332988	1	3723	tags=34%, list=18%, signal=41%
BENNETT_SYSTEMIC_LUPUS_ERYTHEMATOSUS	BENNETT_SYSTEMIC_LUPUS_ERYTHEMATOSUS		29	0.638777	1.33312	0.216842	0.332984	1	5560	tags=72%, list=27%, signal=99%
BRIDEAU_IMPRINTED_GENES	BRIDEAU_IMPRINTED_GENES		61	0.474208	1.33032	0.120921	0.336936	1	3175	tags=34%, list=15%, signal=41%
SA_MMP_CYTOKINE_CONNECTION	SA_MMP_CYTOKINE_CONNECTION		15	0.675191	1.33031	0.142857	0.336645	1	2602	tags=47%, list=13%, signal=53%
HIRSCH_CELLULAR_TRANSFORMATION_SIGNATURE_DN	HIRSCH_CELLULAR_TRANSFORMATION_SIGNATURE_DN		99	0.316839	1.33009	0.143137	0.336689	1	4820	tags=33%, list=24%, signal=43%
ENGELMANN_CANCER_PROGENITORS_UP	ENGELMANN_CANCER_PROGENITORS_UP		47	0.424029	1.32953	0.125969	0.337224	1	3721	tags=38%, list=18%, signal=47%
WANG_PROSTATE_CANCER_ANDROGEN_INDEPENDENT	WANG_PROSTATE_CANCER_ANDROGEN_INDEPENDENT		62	0.335948	1.32862	0.109804	0.338326	1	3761	tags=24%, list=18%, signal=30%
KEGG_LEUKOCYTE_TRANSENDOTHELIAL_MIGRATION	KEGG_LEUKOCYTE_TRANSENDOTHELIAL_MIGRATION		115	0.417973	1.32861	0.136456	0.33804	1	5538	tags=41%, list=27%, signal=56%
MACLACHLAN_BRCA1_TARGETS_DN	MACLACHLAN_BRCA1_TARGETS_DN		16	0.497705	1.32842	0.166667	0.338034	1	1280	tags=13%, list=6%, signal=13%
REACTOME_ADHERENS_JUNCTIONS_INTERACTIONS	REACTOME_ADHERENS_JUNCTIONS_INTERACTIONS		27	0.514105	1.32833	0.116803	0.337855	1	3496	tags=30%, list=17%, signal=36%
FARMER_BREAST_CANCER_APOCRINE_VS_LUMINAL	FARMER_BREAST_CANCER_APOCRINE_VS_LUMINAL		317	0.345128	1.32814	0.0710059	0.337847	1	4885	tags=35%, list=24%, signal=45%
ABRAHAM_ALPC_VS_MULTIPLE_MYELOMA_DN	ABRAHAM_ALPC_VS_MULTIPLE_MYELOMA_DN		19	0.375998	1.32785	0.151874	0.338018	1	3646	tags=26%, list=18%, signal=32%
GAUSSMANN_MLL_AF4_FUSION_TARGETS_F_DN	GAUSSMANN_MLL_AF4_FUSION_TARGETS_F_DN		33	0.502437	1.32784	0.133733	0.337722	1	4116	tags=45%, list=20%, signal=57%
VANTVEER_BREAST_CANCER_POOR_PROGNOSIS	VANTVEER_BREAST_CANCER_POOR_PROGNOSIS		50	0.426022	1.32784	0.114878	0.337427	1	2903	tags=26%, list=14%, signal=30%
RICKMAN_HEAD_AND_NECK_CANCER_F	RICKMAN_HEAD_AND_NECK_CANCER_F		54	0.588262	1.32774	0.116466	0.337272	1	3116	tags=48%, list=15%, signal=57%
NAKAMURA_TUMOR_ZONE_PERIPHERAL_VS_CENTRAL_UP	NAKAMURA_TUMOR_ZONE_PERIPHERAL_VS_CENTRAL_UP		280	0.343228	1.32733	0.169884	0.337613	1	3194	tags=23%, list=16%, signal=26%
REACTOME_TIE2_SIGNALING	REACTOME_TIE2_SIGNALING		17	0.491829	1.32705	0.144231	0.337752	1	4664	tags=41%, list=23%, signal=53%
STOSSI_RESPONSE_TO_ESTRADIOL	STOSSI_RESPONSE_TO_ESTRADIOL		50	0.499613	1.32628	0.113821	0.338589	1	4165	tags=44%, list=20%, signal=55%
REACTOME_N_GLYCAN_ANTENNAE_ELONGATION_IN_THE_MEDIAL_TRANS_GOLGI	REACTOME_N_GLYCAN_ANTENNAE_ELONGATION_IN_THE_MEDIAL_TRANS_GOLGI		18	0.508379	1.32605	0.141732	0.338658	1	4314	tags=44%, list=21%, signal=56%
SPIELMAN_LYMPHOBLAST_EUROPEAN_VS_ASIAN_2FC_DN	SPIELMAN_LYMPHOBLAST_EUROPEAN_VS_ASIAN_2FC_DN		20	0.582925	1.32592	0.16499	0.338588	1	5122	tags=70%, list=25%, signal=93%
HINATA_NFKB_TARGETS_FIBROBLAST_UP	HINATA_NFKB_TARGETS_FIBROBLAST_UP		84	0.452842	1.32582	0.1611	0.338456	1	3275	tags=25%, list=16%, signal=30%
MULLIGHAN_MLL_SIGNATURE_2_UP	MULLIGHAN_MLL_SIGNATURE_2_UP		407	0.312328	1.32561	0.164436	0.338505	1	5794	tags=34%, list=28%, signal=47%
REACTOME_PLATELET_HOMEOSTASIS	REACTOME_PLATELET_HOMEOSTASIS		76	0.464442	1.32554	0.121514	0.338338	1	2118	tags=24%, list=10%, signal=26%
REACTOME_INTERFERON_SIGNALING	REACTOME_INTERFERON_SIGNALING		142	0.404885	1.3252	0.225152	0.338567	1	5930	tags=42%, list=29%, signal=59%
ROSS_LEUKEMIA_WITH_MLL_FUSIONS	ROSS_LEUKEMIA_WITH_MLL_FUSIONS		77	0.424204	1.32473	0.156823	0.33903	1	5526	tags=45%, list=27%, signal=62%
WANG_RESPONSE_TO_GSK3_INHIBITOR_SB216763_UP	WANG_RESPONSE_TO_GSK3_INHIBITOR_SB216763_UP		368	0.368851	1.32448	0.158635	0.339115	1	4982	tags=37%, list=24%, signal=48%
SMITH_TERT_TARGETS_DN	SMITH_TERT_TARGETS_DN		87	0.354091	1.32433	0.157685	0.339047	1	3008	tags=21%, list=15%, signal=24%
ICHIBA_GRAFT_VERSUS_HOST_DISEASE_35D_DN	ICHIBA_GRAFT_VERSUS_HOST_DISEASE_35D_DN		48	0.455617	1.32421	0.0958084	0.338933	1	3130	tags=29%, list=15%, signal=34%
BOQUEST_STEM_CELL_CULTURED_VS_FRESH_DN	BOQUEST_STEM_CELL_CULTURED_VS_FRESH_DN		31	0.651182	1.32413	0.166998	0.338733	1	3126	tags=42%, list=15%, signal=49%
BOSCO_INTERFERON_INDUCED_ANTIVIRAL_MODULE	BOSCO_INTERFERON_INDUCED_ANTIVIRAL_MODULE		75	0.560869	1.32366	0.207661	0.339192	1	4949	tags=56%, list=24%, signal=74%
QI_HYPOXIA	QI_HYPOXIA		138	0.327373	1.32328	0.102041	0.339488	1	4090	tags=26%, list=20%, signal=32%
DAVICIONI_PAX_FOXO1_SIGNATURE_IN_ARMS_UP	DAVICIONI_PAX_FOXO1_SIGNATURE_IN_ARMS_UP		59	0.423816	1.32158	0.126733	0.341844	1	3895	tags=39%, list=19%, signal=48%
TAKEDA_TARGETS_OF_NUP98_HOXA9_FUSION_16D_UP	TAKEDA_TARGETS_OF_NUP98_HOXA9_FUSION_16D_UP		169	0.51961	1.32149	0.143434	0.341684	1	4500	tags=49%, list=22%, signal=62%
BOYLAN_MULTIPLE_MYELOMA_PCA3_DN	BOYLAN_MULTIPLE_MYELOMA_PCA3_DN		66	0.4183	1.32106	0.146245	0.34199	1	5590	tags=50%, list=27%, signal=69%
WU_SILENCED_BY_METHYLATION_IN_BLADDER_CANCER	WU_SILENCED_BY_METHYLATION_IN_BLADDER_CANCER		53	0.533331	1.31953	0.166667	0.343988	1	2662	tags=38%, list=13%, signal=43%
WU_CELL_MIGRATION	WU_CELL_MIGRATION		182	0.421743	1.31951	0.135827	0.343717	1	4367	tags=40%, list=21%, signal=51%
VETTER_TARGETS_OF_PRKCA_AND_ETS1_UP	VETTER_TARGETS_OF_PRKCA_AND_ETS1_UP		16	0.488211	1.31933	0.192157	0.343684	1	2886	tags=38%, list=14%, signal=44%
REACTOME_PHOSPHOLIPASE_C_MEDIATED_CASCADE	REACTOME_PHOSPHOLIPASE_C_MEDIATED_CASCADE		53	0.472841	1.31925	0.118236	0.343512	1	1707	tags=26%, list=8%, signal=29%
TAVOR_CEBPA_TARGETS_DN	TAVOR_CEBPA_TARGETS_DN		30	0.47519	1.31856	0.152	0.344263	1	4558	tags=47%, list=22%, signal=60%
PID_LPA4_PATHWAY	PID_LPA4_PATHWAY		15	0.569424	1.31681	0.176829	0.346647	1	2331	tags=33%, list=11%, signal=38%
NOUSHMEHR_GBM_SILENCED_BY_METHYLATION	NOUSHMEHR_GBM_SILENCED_BY_METHYLATION		50	0.509363	1.31678	0.132114	0.346394	1	2267	tags=34%, list=11%, signal=38%
PLASARI_NFIC_TARGETS_BASAL_UP	PLASARI_NFIC_TARGETS_BASAL_UP		27	0.556618	1.31675	0.121756	0.346158	1	1749	tags=37%, list=9%, signal=40%
SHIPP_DLBCL_CURED_VS_FATAL_UP	SHIPP_DLBCL_CURED_VS_FATAL_UP		39	0.514567	1.31655	0.0876494	0.346179	1	2355	tags=33%, list=11%, signal=38%
KAAB_HEART_ATRIUM_VS_VENTRICLE_DN	KAAB_HEART_ATRIUM_VS_VENTRICLE_DN		258	0.307266	1.3159	0.114625	0.34691	1	4338	tags=25%, list=21%, signal=32%
WEIGEL_OXIDATIVE_STRESS_BY_HNE_AND_TBH	WEIGEL_OXIDATIVE_STRESS_BY_HNE_AND_TBH		60	0.30806	1.31462	0.120408	0.348655	1	5597	tags=32%, list=27%, signal=43%
MENSE_HYPOXIA_UP	MENSE_HYPOXIA_UP		96	0.339579	1.31392	0.156556	0.349505	1	5058	tags=33%, list=25%, signal=44%
ZHANG_TARGETS_OF_EWSR1_FLI1_FUSION	ZHANG_TARGETS_OF_EWSR1_FLI1_FUSION		86	0.379757	1.31374	0.134122	0.349453	1	5104	tags=38%, list=25%, signal=51%
SANSOM_WNT_PATHWAY_REQUIRE_MYC	SANSOM_WNT_PATHWAY_REQUIRE_MYC		57	0.427749	1.31369	0.122	0.349225	1	4180	tags=32%, list=20%, signal=40%
BIOCARTA_SHH_PATHWAY	BIOCARTA_SHH_PATHWAY		16	0.527444	1.31361	0.152964	0.349055	1	4917	tags=56%, list=24%, signal=74%
REACTOME_INFLAMMASOMES	REACTOME_INFLAMMASOMES		16	0.612055	1.31355	0.208171	0.348805	1	3311	tags=44%, list=16%, signal=52%
ST_DIFFERENTIATION_PATHWAY_IN_PC12_CELLS	ST_DIFFERENTIATION_PATHWAY_IN_PC12_CELLS		45	0.376659	1.31306	0.140977	0.349247	1	6564	tags=56%, list=32%, signal=82%
REACTOME_CELL_JUNCTION_ORGANIZATION	REACTOME_CELL_JUNCTION_ORGANIZATION		77	0.424754	1.31292	0.112621	0.349164	1	4876	tags=34%, list=24%, signal=44%
LIANG_SILENCED_BY_METHYLATION_UP	LIANG_SILENCED_BY_METHYLATION_UP		32	0.538511	1.31262	0.140351	0.349344	1	4859	tags=53%, list=24%, signal=70%
OUYANG_PROSTATE_CANCER_MARKERS	OUYANG_PROSTATE_CANCER_MARKERS		19	0.452491	1.31228	0.138402	0.349526	1	4070	tags=37%, list=20%, signal=46%
HOSHIDA_LIVER_CANCER_LATE_RECURRENCE_UP	HOSHIDA_LIVER_CANCER_LATE_RECURRENCE_UP		61	0.450143	1.31196	0.174897	0.349753	1	2099	tags=25%, list=10%, signal=27%
GOBERT_CORE_OLIGODENDROCYTE_DIFFERENTIATION	GOBERT_CORE_OLIGODENDROCYTE_DIFFERENTIATION		40	0.439621	1.31175	0.13253	0.349776	1	2602	tags=33%, list=13%, signal=37%
TAKEDA_TARGETS_OF_NUP98_HOXA9_FUSION_16D_DN	TAKEDA_TARGETS_OF_NUP98_HOXA9_FUSION_16D_DN		134	0.429099	1.3114	0.112871	0.350024	1	3319	tags=28%, list=16%, signal=34%
KUMAR_AUTOPHAGY_NETWORK	KUMAR_AUTOPHAGY_NETWORK		70	0.3804	1.31136	0.120388	0.349767	1	2497	tags=20%, list=12%, signal=23%
ACEVEDO_LIVER_CANCER_WITH_H3K9ME3_UP	ACEVEDO_LIVER_CANCER_WITH_H3K9ME3_UP		126	0.429471	1.311	0.08	0.350016	1	4096	tags=34%, list=20%, signal=42%
WANG_RESPONSE_TO_BEXAROTENE_DN	WANG_RESPONSE_TO_BEXAROTENE_DN		29	0.522924	1.3109	0.149901	0.349878	1	675	tags=17%, list=3%, signal=18%
REACTOME_NCAM_SIGNALING_FOR_NEURITE_OUT_GROWTH	REACTOME_NCAM_SIGNALING_FOR_NEURITE_OUT_GROWTH		64	0.424859	1.31081	0.122807	0.34974	1	2331	tags=28%, list=11%, signal=32%
REACTOME_PYRUVATE_METABOLISM	REACTOME_PYRUVATE_METABOLISM		18	0.42952	1.31078	0.154876	0.349478	1	2526	tags=28%, list=12%, signal=32%
WANG_TUMOR_INVASIVENESS_DN	WANG_TUMOR_INVASIVENESS_DN		208	0.194348	1.31052	0.12253	0.349593	1	6476	tags=30%, list=32%, signal=43%
BIOCARTA_HDAC_PATHWAY	BIOCARTA_HDAC_PATHWAY		28	0.412562	1.31028	0.18146	0.349681	1	2278	tags=14%, list=11%, signal=16%
REACTOME_MHC_CLASS_II_ANTIGEN_PRESENTATION	REACTOME_MHC_CLASS_II_ANTIGEN_PRESENTATION		80	0.328828	1.3095	0.194707	0.350566	1	5611	tags=34%, list=27%, signal=46%
RASHI_RESPONSE_TO_IONIZING_RADIATION_2	RASHI_RESPONSE_TO_IONIZING_RADIATION_2		127	0.349082	1.30914	0.160494	0.350803	1	6141	tags=39%, list=30%, signal=56%
REACTOME_GAB1_SIGNALOSOME	REACTOME_GAB1_SIGNALOSOME		36	0.310419	1.30908	0.15879	0.35058	1	4954	tags=31%, list=24%, signal=40%
RUTELLA_RESPONSE_TO_HGF_DN	RUTELLA_RESPONSE_TO_HGF_DN		228	0.398016	1.30888	0.208333	0.350568	1	5045	tags=37%, list=25%, signal=48%
MASRI_RESISTANCE_TO_TAMOXIFEN_AND_AROMATASE_INHIBITORS_UP	MASRI_RESISTANCE_TO_TAMOXIFEN_AND_AROMATASE_INHIBITORS_UP		20	0.612398	1.30859	0.150515	0.350695	1	2394	tags=50%, list=12%, signal=57%
BOYLAN_MULTIPLE_MYELOMA_D_DN	BOYLAN_MULTIPLE_MYELOMA_D_DN		76	0.419267	1.30828	0.180583	0.350914	1	5013	tags=41%, list=24%, signal=54%
DELACROIX_RARG_BOUND_MEF	DELACROIX_RARG_BOUND_MEF		362	0.3098	1.30803	0.113949	0.350997	1	3345	tags=22%, list=16%, signal=26%
DOANE_BREAST_CANCER_ESR1_UP	DOANE_BREAST_CANCER_ESR1_UP		110	0.674322	1.30749	0.236735	0.351522	1	4640	tags=67%, list=23%, signal=86%
NING_CHRONIC_OBSTRUCTIVE_PULMONARY_DISEASE_DN	NING_CHRONIC_OBSTRUCTIVE_PULMONARY_DISEASE_DN		120	0.312156	1.30562	0.198428	0.354092	1	4996	tags=33%, list=24%, signal=43%
REACTOME_SMAD2_SMAD3_SMAD4_HETEROTRIMER_REGULATES_TRANSCRIPTION	REACTOME_SMAD2_SMAD3_SMAD4_HETEROTRIMER_REGULATES_TRANSCRIPTION		25	0.375587	1.30561	0.184314	0.353814	1	1737	tags=16%, list=8%, signal=17%
GAVIN_FOXP3_TARGETS_CLUSTER_P2	GAVIN_FOXP3_TARGETS_CLUSTER_P2		78	0.44572	1.30558	0.149194	0.353554	1	3885	tags=36%, list=19%, signal=44%
PID_PI3K_PLC_TRK_PATHWAY	PID_PI3K_PLC_TRK_PATHWAY		36	0.3582	1.30439	0.184971	0.355039	1	5405	tags=33%, list=26%, signal=45%
WANG_IMMORTALIZED_BY_HOXA9_AND_MEIS1_UP	WANG_IMMORTALIZED_BY_HOXA9_AND_MEIS1_UP		31	0.503579	1.30403	0.143725	0.3553	1	3449	tags=42%, list=17%, signal=50%
NGUYEN_NOTCH1_TARGETS_DN	NGUYEN_NOTCH1_TARGETS_DN		86	0.315768	1.30401	0.145349	0.35503	1	5590	tags=37%, list=27%, signal=51%
MCLACHLAN_DENTAL_CARIES_UP	MCLACHLAN_DENTAL_CARIES_UP		227	0.533416	1.30365	0.211881	0.355304	1	4575	tags=50%, list=22%, signal=64%
STEARMAN_TUMOR_FIELD_EFFECT_UP	STEARMAN_TUMOR_FIELD_EFFECT_UP		35	0.513328	1.30328	0.165339	0.355599	1	5676	tags=54%, list=28%, signal=75%
SMID_BREAST_CANCER_RELAPSE_IN_LUNG_DN	SMID_BREAST_CANCER_RELAPSE_IN_LUNG_DN		37	0.662643	1.30319	0.189409	0.355423	1	3050	tags=57%, list=15%, signal=67%
REACTOME_EFFECTS_OF_PIP2_HYDROLYSIS	REACTOME_EFFECTS_OF_PIP2_HYDROLYSIS		23	0.510015	1.30315	0.149402	0.355192	1	519	tags=13%, list=3%, signal=13%
KEGG_VASCULAR_SMOOTH_MUSCLE_CONTRACTION	KEGG_VASCULAR_SMOOTH_MUSCLE_CONTRACTION		113	0.413066	1.3024	0.120968	0.356068	1	4459	tags=35%, list=22%, signal=45%
HADDAD_T_LYMPHOCYTE_AND_NK_PROGENITOR_DN	HADDAD_T_LYMPHOCYTE_AND_NK_PROGENITOR_DN		63	0.527724	1.30236	0.163347	0.355851	1	4705	tags=48%, list=23%, signal=62%
KIM_LIVER_CANCER_POOR_SURVIVAL_UP	KIM_LIVER_CANCER_POOR_SURVIVAL_UP		22	0.46049	1.30227	0.220755	0.35569	1	1436	tags=18%, list=7%, signal=20%
REACTOME_RAS_ACTIVATION_UOPN_CA2_INFUX_THROUGH_NMDA_RECEPTOR	REACTOME_RAS_ACTIVATION_UOPN_CA2_INFUX_THROUGH_NMDA_RECEPTOR		17	0.549004	1.30184	0.144869	0.356073	1	2508	tags=29%, list=12%, signal=33%
REACTOME_KERATAN_SULFATE_KERATIN_METABOLISM	REACTOME_KERATAN_SULFATE_KERATIN_METABOLISM		30	0.490159	1.30175	0.161736	0.355916	1	2980	tags=33%, list=15%, signal=39%
NELSON_RESPONSE_TO_ANDROGEN_DN	NELSON_RESPONSE_TO_ANDROGEN_DN		19	0.492771	1.3016	0.166667	0.355846	1	4068	tags=42%, list=20%, signal=52%
KEGG_RENIN_ANGIOTENSIN_SYSTEM	KEGG_RENIN_ANGIOTENSIN_SYSTEM		17	0.581716	1.30122	0.15102	0.356146	1	2627	tags=47%, list=13%, signal=54%
BOGNI_TREATMENT_RELATED_MYELOID_LEUKEMIA_DN	BOGNI_TREATMENT_RELATED_MYELOID_LEUKEMIA_DN		29	0.344812	1.30039	0.179012	0.357078	1	4068	tags=28%, list=20%, signal=34%
AMIT_SERUM_RESPONSE_120_MCF10A	AMIT_SERUM_RESPONSE_120_MCF10A		64	0.39126	1.29971	0.197959	0.357837	1	3865	tags=30%, list=19%, signal=36%
BROWNE_HCMV_INFECTION_8HR_DN	BROWNE_HCMV_INFECTION_8HR_DN		46	0.420896	1.29965	0.121457	0.357639	1	3749	tags=30%, list=18%, signal=37%
DELACROIX_RAR_TARGETS_DN	DELACROIX_RAR_TARGETS_DN		24	0.480295	1.29896	0.153398	0.358366	1	4271	tags=54%, list=21%, signal=68%
CHESLER_BRAIN_QTL_CIS	CHESLER_BRAIN_QTL_CIS		74	0.280719	1.29799	0.104126	0.359685	1	1095	tags=8%, list=5%, signal=9%
ZHONG_RESPONSE_TO_AZACITIDINE_AND_TSA_UP	ZHONG_RESPONSE_TO_AZACITIDINE_AND_TSA_UP		181	0.334365	1.29794	0.10119	0.359457	1	6151	tags=45%, list=30%, signal=63%
AMIT_EGF_RESPONSE_60_MCF10A	AMIT_EGF_RESPONSE_60_MCF10A		39	0.481521	1.2974	0.202783	0.359975	1	3163	tags=31%, list=15%, signal=36%
ZHAN_V2_LATE_DIFFERENTIATION_GENES	ZHAN_V2_LATE_DIFFERENTIATION_GENES		43	0.339928	1.2965	0.200787	0.361129	1	5360	tags=35%, list=26%, signal=47%
OSWALD_HEMATOPOIETIC_STEM_CELL_IN_COLLAGEN_GEL_DN	OSWALD_HEMATOPOIETIC_STEM_CELL_IN_COLLAGEN_GEL_DN		261	0.299596	1.29614	0.15213	0.36136	1	6037	tags=39%, list=29%, signal=55%
KIM_PTEN_TARGETS_UP	KIM_PTEN_TARGETS_UP		18	0.487234	1.29599	0.161157	0.361281	1	3878	tags=39%, list=19%, signal=48%
JUBAN_TARGETS_OF_SPI1_AND_FLI1_UP	JUBAN_TARGETS_OF_SPI1_AND_FLI1_UP		114	0.240575	1.29568	0.123506	0.361461	1	4183	tags=20%, list=20%, signal=25%
APPIERTO_RESPONSE_TO_FENRETINIDE_UP	APPIERTO_RESPONSE_TO_FENRETINIDE_UP		38	0.369657	1.29542	0.164634	0.361561	1	5581	tags=47%, list=27%, signal=65%
BIOCARTA_AMI_PATHWAY	BIOCARTA_AMI_PATHWAY		20	0.566394	1.29507	0.131274	0.3618	1	3017	tags=50%, list=15%, signal=59%
PEDERSEN_METASTASIS_BY_ERBB2_ISOFORM_1	PEDERSEN_METASTASIS_BY_ERBB2_ISOFORM_1		46	0.490328	1.29456	0.171484	0.3623	1	2669	tags=30%, list=13%, signal=35%
YAUCH_HEDGEHOG_SIGNALING_PARACRINE_UP	YAUCH_HEDGEHOG_SIGNALING_PARACRINE_UP		144	0.437647	1.2942	0.13215	0.362546	1	1918	tags=22%, list=9%, signal=24%
HERNANDEZ_MITOTIC_ARREST_BY_DOCETAXEL_1_UP	HERNANDEZ_MITOTIC_ARREST_BY_DOCETAXEL_1_UP		34	0.497686	1.29398	0.117409	0.362575	1	4296	tags=44%, list=21%, signal=56%
POS_HISTAMINE_RESPONSE_NETWORK	POS_HISTAMINE_RESPONSE_NETWORK		32	0.448108	1.2937	0.152642	0.362727	1	2630	tags=28%, list=13%, signal=32%
LEE_CALORIE_RESTRICTION_MUSCLE_DN	LEE_CALORIE_RESTRICTION_MUSCLE_DN		50	0.29298	1.29368	0.134538	0.362463	1	6089	tags=34%, list=30%, signal=48%
REACTOME_AMINO_ACID_TRANSPORT_ACROSS_THE_PLASMA_MEMBRANE	REACTOME_AMINO_ACID_TRANSPORT_ACROSS_THE_PLASMA_MEMBRANE		31	0.466534	1.29354	0.107632	0.362367	1	2461	tags=29%, list=12%, signal=33%
REACTOME_HEPARAN_SULFATE_HEPARIN_HS_GAG_METABOLISM	REACTOME_HEPARAN_SULFATE_HEPARIN_HS_GAG_METABOLISM		51	0.430118	1.29337	0.161355	0.362326	1	3414	tags=31%, list=17%, signal=38%
REACTOME_ACTIVATION_OF_NMDA_RECEPTOR_UPON_GLUTAMATE_BINDING_AND_POSTSYNAPTIC_EVENTS	REACTOME_ACTIVATION_OF_NMDA_RECEPTOR_UPON_GLUTAMATE_BINDING_AND_POSTSYNAPTIC_EVENTS		37	0.459873	1.29334	0.129741	0.362071	1	2508	tags=24%, list=12%, signal=28%
BIOCARTA_GCR_PATHWAY	BIOCARTA_GCR_PATHWAY		19	0.471932	1.2932	0.185629	0.36201	1	4682	tags=37%, list=23%, signal=48%
ST_P38_MAPK_PATHWAY	ST_P38_MAPK_PATHWAY		37	0.307652	1.29302	0.196532	0.361987	1	6564	tags=51%, list=32%, signal=75%
KERLEY_RESPONSE_TO_CISPLATIN_UP	KERLEY_RESPONSE_TO_CISPLATIN_UP		43	0.441125	1.29271	0.204499	0.362177	1	5940	tags=53%, list=29%, signal=75%
NUMATA_CSF3_SIGNALING_VIA_STAT3	NUMATA_CSF3_SIGNALING_VIA_STAT3		22	0.443832	1.29211	0.144269	0.362823	1	4117	tags=45%, list=20%, signal=57%
FIRESTEIN_PROLIFERATION	FIRESTEIN_PROLIFERATION		169	0.35707	1.29098	0.110664	0.364372	1	2398	tags=18%, list=12%, signal=21%
CHANDRAN_METASTASIS_TOP50_UP	CHANDRAN_METASTASIS_TOP50_UP		35	0.333532	1.29088	0.193018	0.364248	1	3005	tags=14%, list=15%, signal=17%
GUO_TARGETS_OF_IRS1_AND_IRS2	GUO_TARGETS_OF_IRS1_AND_IRS2		94	0.305616	1.29088	0.103792	0.363951	1	4843	tags=31%, list=24%, signal=40%
COULOUARN_TEMPORAL_TGFB1_SIGNATURE_DN	COULOUARN_TEMPORAL_TGFB1_SIGNATURE_DN		136	0.322041	1.29083	0.0961924	0.363714	1	4026	tags=26%, list=20%, signal=33%
WONG_IFNA2_RESISTANCE_DN	WONG_IFNA2_RESISTANCE_DN		33	0.407342	1.28979	0.164659	0.365071	1	2656	tags=18%, list=13%, signal=21%
REACTOME_GAP_JUNCTION_TRAFFICKING	REACTOME_GAP_JUNCTION_TRAFFICKING		27	0.519338	1.28846	0.170341	0.366774	1	3225	tags=37%, list=16%, signal=44%
DEBIASI_APOPTOSIS_BY_REOVIRUS_INFECTION_DN	DEBIASI_APOPTOSIS_BY_REOVIRUS_INFECTION_DN		283	0.253395	1.28764	0.1611	0.367694	1	5563	tags=29%, list=27%, signal=40%
MATZUK_EMBRYONIC_GERM_CELL	MATZUK_EMBRYONIC_GERM_CELL		19	0.52062	1.28651	0.132114	0.369111	1	3087	tags=37%, list=15%, signal=43%
DEMAGALHAES_AGING_UP	DEMAGALHAES_AGING_UP		54	0.441984	1.28636	0.19057	0.369028	1	5233	tags=54%, list=26%, signal=72%
REACTOME_REGULATION_OF_INSULIN_LIKE_GROWTH_FACTOR_IGF_ACTIVITY_BY_INSULIN_LIKE_GROWTH_FACTOR_BINDING_PROTEINS_IGFBPS	REACTOME_REGULATION_OF_INSULIN_LIKE_GROWTH_FACTOR_IGF_ACTIVITY_BY_INSULIN_LIKE_GROWTH_FACTOR_BINDING_PROTEINS_IGFBPS		16	0.576021	1.28576	0.164634	0.369672	1	3670	tags=56%, list=18%, signal=68%
HOEGERKORP_CD44_TARGETS_DIRECT_UP	HOEGERKORP_CD44_TARGETS_DIRECT_UP		26	0.481394	1.28562	0.153242	0.369579	1	3171	tags=31%, list=15%, signal=36%
REACTOME_PI_3K_CASCADE	REACTOME_PI_3K_CASCADE		54	0.396511	1.28541	0.132265	0.369575	1	4664	tags=35%, list=23%, signal=45%
ZIRN_TRETINOIN_RESPONSE_WT1_UP	ZIRN_TRETINOIN_RESPONSE_WT1_UP		23	0.535139	1.28531	0.194059	0.369387	1	1783	tags=30%, list=9%, signal=33%
REACTOME_NCAM1_INTERACTIONS	REACTOME_NCAM1_INTERACTIONS		39	0.488001	1.2847	0.140078	0.370086	1	2087	tags=41%, list=10%, signal=46%
PID_S1P_S1P1_PATHWAY	PID_S1P_S1P1_PATHWAY		21	0.459033	1.28434	0.181474	0.370348	1	3105	tags=29%, list=15%, signal=34%
WOTTON_RUNX_TARGETS_DN	WOTTON_RUNX_TARGETS_DN		29	0.449152	1.28376	0.162055	0.370938	1	5152	tags=52%, list=25%, signal=69%
ZHAN_LATE_DIFFERENTIATION_GENES_UP	ZHAN_LATE_DIFFERENTIATION_GENES_UP		32	0.444916	1.28376	0.205534	0.370639	1	5832	tags=59%, list=28%, signal=83%
FOSTER_TOLERANT_MACROPHAGE_UP	FOSTER_TOLERANT_MACROPHAGE_UP		152	0.390398	1.28333	0.162	0.370969	1	3321	tags=25%, list=16%, signal=30%
LI_WILMS_TUMOR_VS_FETAL_KIDNEY_2_UP	LI_WILMS_TUMOR_VS_FETAL_KIDNEY_2_UP		30	0.488456	1.2832	0.153693	0.370877	1	2462	tags=30%, list=12%, signal=34%
GAJATE_RESPONSE_TO_TRABECTEDIN_UP	GAJATE_RESPONSE_TO_TRABECTEDIN_UP		64	0.399564	1.28311	0.172	0.370715	1	5822	tags=48%, list=28%, signal=67%
MAINA_VHL_TARGETS_DN	MAINA_VHL_TARGETS_DN		18	0.451858	1.28307	0.172	0.370473	1	3233	tags=39%, list=16%, signal=46%
REACTOME_NUCLEOTIDE_BINDING_DOMAIN_LEUCINE_RICH_REPEAT_CONTAINING_RECEPTOR_NLR_SIGNALING_PATHWAYS	REACTOME_NUCLEOTIDE_BINDING_DOMAIN_LEUCINE_RICH_REPEAT_CONTAINING_RECEPTOR_NLR_SIGNALING_PATHWAYS		44	0.430465	1.28271	0.247126	0.370758	1	5776	tags=48%, list=28%, signal=66%
PID_IGF1_PATHWAY	PID_IGF1_PATHWAY		30	0.335939	1.28239	0.180556	0.370983	1	6309	tags=43%, list=31%, signal=63%
PID_GMCSF_PATHWAY	PID_GMCSF_PATHWAY		37	0.421455	1.28199	0.235756	0.371285	1	5777	tags=43%, list=28%, signal=60%
BIOCARTA_CERAMIDE_PATHWAY	BIOCARTA_CERAMIDE_PATHWAY		22	0.325512	1.28176	0.186	0.371384	1	6564	tags=36%, list=32%, signal=53%
LINDSTEDT_DENDRITIC_CELL_MATURATION_B	LINDSTEDT_DENDRITIC_CELL_MATURATION_B		52	0.480726	1.28166	0.22549	0.371235	1	5770	tags=50%, list=28%, signal=69%
RIGGINS_TAMOXIFEN_RESISTANCE_UP	RIGGINS_TAMOXIFEN_RESISTANCE_UP		66	0.447684	1.28139	0.153693	0.371366	1	4160	tags=36%, list=20%, signal=45%
REACTOME_RECYCLING_PATHWAY_OF_L1	REACTOME_RECYCLING_PATHWAY_OF_L1		27	0.388192	1.28121	0.174242	0.371353	1	6564	tags=52%, list=32%, signal=76%
REACTOME_COMPLEMENT_CASCADE	REACTOME_COMPLEMENT_CASCADE		29	0.543679	1.28109	0.170341	0.371243	1	5184	tags=59%, list=25%, signal=78%
UEDA_CENTRAL_CLOCK	UEDA_CENTRAL_CLOCK		85	0.303381	1.28101	0.14313	0.371077	1	1140	tags=11%, list=6%, signal=11%
CHIBA_RESPONSE_TO_TSA_UP	CHIBA_RESPONSE_TO_TSA_UP		51	0.447736	1.27928	0.178138	0.373542	1	2796	tags=27%, list=14%, signal=32%
YANG_BREAST_CANCER_ESR1_UP	YANG_BREAST_CANCER_ESR1_UP		36	0.676371	1.27907	0.272912	0.373585	1	4040	tags=61%, list=20%, signal=76%
PLASARI_TGFB1_SIGNALING_VIA_NFIC_10HR_DN	PLASARI_TGFB1_SIGNALING_VIA_NFIC_10HR_DN		30	0.505396	1.27896	0.18254	0.373467	1	3575	tags=43%, list=17%, signal=52%
STEARMAN_LUNG_CANCER_EARLY_VS_LATE_DN	STEARMAN_LUNG_CANCER_EARLY_VS_LATE_DN		59	0.404607	1.27883	0.196597	0.373368	1	4478	tags=34%, list=22%, signal=43%
RAMASWAMY_METASTASIS_DN	RAMASWAMY_METASTASIS_DN		59	0.44088	1.27876	0.160079	0.373185	1	3303	tags=31%, list=16%, signal=36%
GRANDVAUX_IRF3_TARGETS_UP	GRANDVAUX_IRF3_TARGETS_UP		15	0.628713	1.27863	0.24197	0.373092	1	5111	tags=67%, list=25%, signal=89%
VALK_AML_CLUSTER_4	VALK_AML_CLUSTER_4		29	0.481468	1.27822	0.226	0.373439	1	4648	tags=41%, list=23%, signal=53%
ABBUD_LIF_SIGNALING_1_UP	ABBUD_LIF_SIGNALING_1_UP		46	0.451091	1.27763	0.177551	0.37412	1	6271	tags=54%, list=31%, signal=78%
YAO_TEMPORAL_RESPONSE_TO_PROGESTERONE_CLUSTER_6	YAO_TEMPORAL_RESPONSE_TO_PROGESTERONE_CLUSTER_6		74	0.396951	1.27649	0.148148	0.375618	1	3649	tags=23%, list=18%, signal=28%
KYNG_WERNER_SYNDROM_UP	KYNG_WERNER_SYNDROM_UP		18	0.40771	1.27614	0.215569	0.375829	1	2764	tags=22%, list=13%, signal=26%
SUZUKI_RESPONSE_TO_TSA_AND_DECITABINE_1B	SUZUKI_RESPONSE_TO_TSA_AND_DECITABINE_1B		23	0.517699	1.27566	0.133333	0.376318	1	5070	tags=52%, list=25%, signal=69%
BIOCARTA_GLEEVEC_PATHWAY	BIOCARTA_GLEEVEC_PATHWAY		23	0.357861	1.2755	0.206759	0.376275	1	6109	tags=35%, list=30%, signal=49%
PID_EPHA2_FWD_PATHWAY	PID_EPHA2_FWD_PATHWAY		18	0.356186	1.27542	0.182731	0.376105	1	8055	tags=56%, list=39%, signal=91%
VALK_AML_CLUSTER_6	VALK_AML_CLUSTER_6		29	0.421269	1.27524	0.180392	0.376069	1	2518	tags=24%, list=12%, signal=27%
ZHAN_MULTIPLE_MYELOMA_HP_DN	ZHAN_MULTIPLE_MYELOMA_HP_DN		43	0.372856	1.27512	0.206564	0.375946	1	4436	tags=33%, list=22%, signal=41%
BIOCARTA_CHEMICAL_PATHWAY	BIOCARTA_CHEMICAL_PATHWAY		22	0.341931	1.275	0.172345	0.375835	1	7882	tags=59%, list=38%, signal=96%
MARKEY_RB1_CHRONIC_LOF_DN	MARKEY_RB1_CHRONIC_LOF_DN		117	0.43342	1.27483	0.209213	0.375838	1	5385	tags=48%, list=26%, signal=65%
KAYO_AGING_MUSCLE_UP	KAYO_AGING_MUSCLE_UP		240	0.366852	1.27483	0.125	0.375543	1	3629	tags=26%, list=18%, signal=32%
REACTOME_SIGNALING_BY_ILS	REACTOME_SIGNALING_BY_ILS		105	0.411636	1.27465	0.26506	0.375548	1	5597	tags=38%, list=27%, signal=52%
REACTOME_HS_GAG_BIOSYNTHESIS	REACTOME_HS_GAG_BIOSYNTHESIS		30	0.479901	1.27463	0.181452	0.375289	1	5124	tags=50%, list=25%, signal=67%
BIOCARTA_PAR1_PATHWAY	BIOCARTA_PAR1_PATHWAY		37	0.400192	1.27454	0.176	0.375144	1	5854	tags=49%, list=29%, signal=68%
FARMER_BREAST_CANCER_BASAL_VS_LULMINAL	FARMER_BREAST_CANCER_BASAL_VS_LULMINAL		325	0.317873	1.27451	0.123314	0.374902	1	4404	tags=33%, list=21%, signal=41%
LI_CISPLATIN_RESISTANCE_DN	LI_CISPLATIN_RESISTANCE_DN		35	0.49444	1.27428	0.120968	0.374996	1	3218	tags=34%, list=16%, signal=41%
ICHIBA_GRAFT_VERSUS_HOST_DISEASE_D7_UP	ICHIBA_GRAFT_VERSUS_HOST_DISEASE_D7_UP		100	0.480294	1.27407	0.21	0.374987	1	5276	tags=49%, list=26%, signal=66%
DELACROIX_RAR_TARGETS_UP	DELACROIX_RAR_TARGETS_UP		48	0.409697	1.27378	0.178357	0.375124	1	2876	tags=27%, list=14%, signal=31%
PID_HIF1_TFPATHWAY	PID_HIF1_TFPATHWAY		66	0.358679	1.27358	0.180791	0.375152	1	4954	tags=35%, list=24%, signal=46%
CASTELLANO_NRAS_TARGETS_UP	CASTELLANO_NRAS_TARGETS_UP		67	0.418501	1.27332	0.179959	0.37524	1	5375	tags=42%, list=26%, signal=56%
REACTOME_NFKB_AND_MAP_KINASES_ACTIVATION_MEDIATED_BY_TLR4_SIGNALING_REPERTOIRE	REACTOME_NFKB_AND_MAP_KINASES_ACTIVATION_MEDIATED_BY_TLR4_SIGNALING_REPERTOIRE		70	0.304252	1.27303	0.211946	0.375435	1	6564	tags=43%, list=32%, signal=63%
BROWNE_HCMV_INFECTION_14HR_UP	BROWNE_HCMV_INFECTION_14HR_UP		151	0.254092	1.27289	0.140625	0.37537	1	6800	tags=39%, list=33%, signal=58%
AMBROSINI_FLAVOPIRIDOL_TREATMENT_TP53	AMBROSINI_FLAVOPIRIDOL_TREATMENT_TP53		108	0.320467	1.27257	0.120724	0.375566	1	3792	tags=26%, list=18%, signal=32%
ZHANG_ANTIVIRAL_RESPONSE_TO_RIBAVIRIN_UP	ZHANG_ANTIVIRAL_RESPONSE_TO_RIBAVIRIN_UP		29	0.483694	1.27252	0.191235	0.375336	1	4430	tags=48%, list=22%, signal=61%
HALMOS_CEBPA_TARGETS_DN	HALMOS_CEBPA_TARGETS_DN		43	0.396756	1.27242	0.156057	0.375222	1	2739	tags=26%, list=13%, signal=29%
FARMER_BREAST_CANCER_CLUSTER_7	FARMER_BREAST_CANCER_CLUSTER_7		19	0.601388	1.27198	0.245361	0.375678	1	4610	tags=53%, list=22%, signal=68%
BEIER_GLIOMA_STEM_CELL_UP	BEIER_GLIOMA_STEM_CELL_UP		36	0.438881	1.27195	0.13253	0.37544	1	3089	tags=25%, list=15%, signal=29%
BIOCARTA_CD40_PATHWAY	BIOCARTA_CD40_PATHWAY		15	0.47393	1.2713	0.24	0.376102	1	7139	tags=60%, list=35%, signal=92%
XU_HGF_TARGETS_INDUCED_BY_AKT1_6HR	XU_HGF_TARGETS_INDUCED_BY_AKT1_6HR		19	0.508331	1.27127	0.259481	0.375863	1	7604	tags=84%, list=37%, signal=134%
NAGASHIMA_NRG1_SIGNALING_DN	NAGASHIMA_NRG1_SIGNALING_DN		54	0.355255	1.27104	0.153846	0.375908	1	3868	tags=24%, list=19%, signal=30%
WILLIAMS_ESR2_TARGETS_UP	WILLIAMS_ESR2_TARGETS_UP		27	0.413657	1.27091	0.19833	0.375817	1	7539	tags=56%, list=37%, signal=88%
KOYAMA_SEMA3B_TARGETS_UP	KOYAMA_SEMA3B_TARGETS_UP		278	0.322901	1.26986	0.108268	0.377168	1	4991	tags=33%, list=24%, signal=44%
MCCLUNG_CREB1_TARGETS_DN	MCCLUNG_CREB1_TARGETS_DN		57	0.388319	1.26938	0.173469	0.377654	1	4781	tags=32%, list=23%, signal=41%
REACTOME_A_TETRASACCHARIDE_LINKER_SEQUENCE_IS_REQUIRED_FOR_GAG_SYNTHESIS	REACTOME_A_TETRASACCHARIDE_LINKER_SEQUENCE_IS_REQUIRED_FOR_GAG_SYNTHESIS		25	0.484843	1.26862	0.190965	0.378535	1	3414	tags=40%, list=17%, signal=48%
ACEVEDO_FGFR1_TARGETS_IN_PROSTATE_CANCER_MODEL_DN	ACEVEDO_FGFR1_TARGETS_IN_PROSTATE_CANCER_MODEL_DN		300	0.424285	1.26843	0.149515	0.378508	1	3288	tags=34%, list=16%, signal=40%
BIOCARTA_INTRINSIC_PATHWAY	BIOCARTA_INTRINSIC_PATHWAY		23	0.519681	1.26843	0.169625	0.37822	1	2800	tags=48%, list=14%, signal=55%
BIOCARTA_IL10_PATHWAY	BIOCARTA_IL10_PATHWAY		17	0.550014	1.26793	0.236735	0.378669	1	5335	tags=53%, list=26%, signal=72%
BILD_HRAS_ONCOGENIC_SIGNATURE	BILD_HRAS_ONCOGENIC_SIGNATURE		253	0.391842	1.2679	0.196498	0.37844	1	3536	tags=29%, list=17%, signal=34%
MEISSNER_NPC_HCP_WITH_H3K4ME3_AND_H3K27ME3	MEISSNER_NPC_HCP_WITH_H3K4ME3_AND_H3K27ME3		139	0.433978	1.2669	0.13253	0.379692	1	2976	tags=29%, list=15%, signal=34%
MCCLUNG_CREB1_TARGETS_UP	MCCLUNG_CREB1_TARGETS_UP		100	0.368556	1.26689	0.129412	0.379422	1	2126	tags=22%, list=10%, signal=24%
PID_BMP_PATHWAY	PID_BMP_PATHWAY		42	0.428208	1.26677	0.200401	0.379327	1	6629	tags=62%, list=32%, signal=91%
WHITEHURST_PACLITAXEL_SENSITIVITY	WHITEHURST_PACLITAXEL_SENSITIVITY		38	0.42773	1.26664	0.128571	0.379252	1	3627	tags=37%, list=18%, signal=45%
ULE_SPLICING_VIA_NOVA2	ULE_SPLICING_VIA_NOVA2		43	0.396104	1.26631	0.174349	0.379506	1	4160	tags=37%, list=20%, signal=47%
LIAN_LIPA_TARGETS_3M	LIAN_LIPA_TARGETS_3M		58	0.537137	1.2658	0.227184	0.37999	1	5184	tags=62%, list=25%, signal=83%
ST_GA12_PATHWAY	ST_GA12_PATHWAY		23	0.466862	1.26559	0.193347	0.380001	1	2740	tags=26%, list=13%, signal=30%
HOWLIN_CITED1_TARGETS_2_DN	HOWLIN_CITED1_TARGETS_2_DN		17	0.482078	1.26551	0.162272	0.379843	1	5220	tags=59%, list=25%, signal=79%
GENTILE_UV_RESPONSE_CLUSTER_D1	GENTILE_UV_RESPONSE_CLUSTER_D1		18	0.397997	1.26529	0.211462	0.379865	1	3672	tags=22%, list=18%, signal=27%
SMID_BREAST_CANCER_RELAPSE_IN_BONE_UP	SMID_BREAST_CANCER_RELAPSE_IN_BONE_UP		95	0.618155	1.26438	0.238193	0.380928	1	4947	tags=65%, list=24%, signal=86%
REACTOME_KERATAN_SULFATE_BIOSYNTHESIS	REACTOME_KERATAN_SULFATE_BIOSYNTHESIS		26	0.503871	1.26394	0.188119	0.381355	1	2963	tags=35%, list=14%, signal=40%
KATSANOU_ELAVL1_TARGETS_UP	KATSANOU_ELAVL1_TARGETS_UP		166	0.401492	1.26301	0.173152	0.382378	1	4473	tags=39%, list=22%, signal=49%
KANNAN_TP53_TARGETS_UP	KANNAN_TP53_TARGETS_UP		58	0.377486	1.26247	0.205645	0.3829	1	5822	tags=40%, list=28%, signal=55%
LEE_AGING_NEOCORTEX_DN	LEE_AGING_NEOCORTEX_DN		77	0.379086	1.26208	0.147929	0.383197	1	4982	tags=35%, list=24%, signal=46%
YAO_TEMPORAL_RESPONSE_TO_PROGESTERONE_CLUSTER_5	YAO_TEMPORAL_RESPONSE_TO_PROGESTERONE_CLUSTER_5		28	0.472455	1.26176	0.170297	0.383394	1	2711	tags=29%, list=13%, signal=33%
MARSON_FOXP3_TARGETS_UP	MARSON_FOXP3_TARGETS_UP		66	0.396743	1.26133	0.224949	0.38378	1	6920	tags=48%, list=34%, signal=73%
BIOCARTA_GATA3_PATHWAY	BIOCARTA_GATA3_PATHWAY		16	0.491822	1.2608	0.206827	0.384302	1	4725	tags=50%, list=23%, signal=65%
GRADE_COLON_CANCER_DN	GRADE_COLON_CANCER_DN		32	0.404335	1.26077	0.208251	0.384072	1	2226	tags=22%, list=11%, signal=25%
YAGI_AML_WITH_T_8_21_TRANSLOCATION	YAGI_AML_WITH_T_8_21_TRANSLOCATION		354	0.288233	1.26037	0.174089	0.384439	1	4596	tags=25%, list=22%, signal=32%
SAGIV_CD24_TARGETS_DN	SAGIV_CD24_TARGETS_DN		46	0.426025	1.26027	0.201161	0.384319	1	5886	tags=54%, list=29%, signal=76%
WEIGEL_OXIDATIVE_STRESS_BY_HNE_AND_H2O2	WEIGEL_OXIDATIVE_STRESS_BY_HNE_AND_H2O2		39	0.373767	1.25871	0.175701	0.386527	1	1874	tags=15%, list=9%, signal=17%
HASLINGER_B_CLL_WITH_11Q23_DELETION	HASLINGER_B_CLL_WITH_11Q23_DELETION		23	0.405726	1.25862	0.183267	0.386392	1	7000	tags=65%, list=34%, signal=99%
NIELSEN_LEIOMYOSARCOMA_UP	NIELSEN_LEIOMYOSARCOMA_UP		17	0.549629	1.2586	0.210317	0.386122	1	2514	tags=35%, list=12%, signal=40%
TANG_SENESCENCE_TP53_TARGETS_UP	TANG_SENESCENCE_TP53_TARGETS_UP		33	0.496303	1.25859	0.195266	0.385853	1	3550	tags=42%, list=17%, signal=51%
MOHANKUMAR_HOXA1_TARGETS_UP	MOHANKUMAR_HOXA1_TARGETS_UP		407	0.232088	1.25825	0.169625	0.386091	1	5911	tags=27%, list=29%, signal=37%
GOZGIT_ESR1_TARGETS_UP	GOZGIT_ESR1_TARGETS_UP		142	0.398938	1.25811	0.155378	0.386017	1	4414	tags=36%, list=22%, signal=45%
PID_THROMBIN_PAR1_PATHWAY	PID_THROMBIN_PAR1_PATHWAY		43	0.387606	1.25788	0.201581	0.386087	1	6750	tags=56%, list=33%, signal=83%
PID_TXA2PATHWAY	PID_TXA2PATHWAY		57	0.460162	1.25716	0.251497	0.386946	1	4459	tags=35%, list=22%, signal=45%
KEGG_VALINE_LEUCINE_AND_ISOLEUCINE_DEGRADATION	KEGG_VALINE_LEUCINE_AND_ISOLEUCINE_DEGRADATION		44	0.35101	1.25707	0.195918	0.386823	1	4411	tags=23%, list=22%, signal=29%
ST_ERK1_ERK2_MAPK_PATHWAY	ST_ERK1_ERK2_MAPK_PATHWAY		32	0.326512	1.25701	0.225681	0.386641	1	6886	tags=50%, list=34%, signal=75%
TONKS_TARGETS_OF_RUNX1_RUNX1T1_FUSION_GRANULOCYTE_UP	TONKS_TARGETS_OF_RUNX1_RUNX1T1_FUSION_GRANULOCYTE_UP		53	0.421389	1.2565	0.177866	0.387162	1	4385	tags=40%, list=21%, signal=50%
REACTOME_SIGNALING_BY_FGFR_MUTANTS	REACTOME_SIGNALING_BY_FGFR_MUTANTS		42	0.394072	1.25596	0.160232	0.387716	1	5363	tags=43%, list=26%, signal=58%
REACTOME_TRAFFICKING_OF_AMPA_RECEPTORS	REACTOME_TRAFFICKING_OF_AMPA_RECEPTORS		27	0.466611	1.25564	0.165669	0.387913	1	1308	tags=22%, list=6%, signal=24%
CHEN_LIVER_METABOLISM_QTL_CIS	CHEN_LIVER_METABOLISM_QTL_CIS		93	0.356462	1.25549	0.173307	0.387845	1	3421	tags=24%, list=17%, signal=28%
MATTIOLI_MGUS_VS_MULTIPLE_MYELOMA	MATTIOLI_MGUS_VS_MULTIPLE_MYELOMA		15	0.406416	1.25453	0.217054	0.38896	1	5881	tags=40%, list=29%, signal=56%
ZHOU_INFLAMMATORY_RESPONSE_LPS_UP	ZHOU_INFLAMMATORY_RESPONSE_LPS_UP		392	0.370391	1.25448	0.116	0.38873	1	3514	tags=30%, list=17%, signal=36%
THEODOROU_MAMMARY_TUMORIGENESIS	THEODOROU_MAMMARY_TUMORIGENESIS		31	0.489464	1.25374	0.175403	0.38955	1	4563	tags=55%, list=22%, signal=70%
ACEVEDO_LIVER_CANCER_WITH_H3K27ME3_DN	ACEVEDO_LIVER_CANCER_WITH_H3K27ME3_DN		204	0.375705	1.25349	0.14664	0.389625	1	3655	tags=30%, list=18%, signal=36%
AKL_HTLV1_INFECTION_DN	AKL_HTLV1_INFECTION_DN		65	0.434428	1.25339	0.236328	0.389489	1	3202	tags=31%, list=16%, signal=36%
HERNANDEZ_ABERRANT_MITOSIS_BY_DOCETACEL_2NM_DN	HERNANDEZ_ABERRANT_MITOSIS_BY_DOCETACEL_2NM_DN		25	0.492554	1.25324	0.195918	0.389431	1	4746	tags=48%, list=23%, signal=62%
DEMAGALHAES_AGING_DN	DEMAGALHAES_AGING_DN		16	0.456487	1.25312	0.210204	0.389329	1	3119	tags=31%, list=15%, signal=37%
BYSTRYKH_HEMATOPOIESIS_STEM_CELL_SCP2_QTL_TRANS	BYSTRYKH_HEMATOPOIESIS_STEM_CELL_SCP2_QTL_TRANS		22	0.481502	1.25271	0.187629	0.389643	1	4535	tags=45%, list=22%, signal=58%
ROSS_AML_WITH_MLL_FUSIONS	ROSS_AML_WITH_MLL_FUSIONS		76	0.397496	1.25261	0.220238	0.389506	1	5832	tags=43%, list=28%, signal=60%
BANDRES_RESPONSE_TO_CARMUSTIN_WITHOUT_MGMT_48HR_UP	BANDRES_RESPONSE_TO_CARMUSTIN_WITHOUT_MGMT_48HR_UP		18	0.473019	1.25186	0.192534	0.390409	1	2702	tags=22%, list=13%, signal=26%
KEGG_ABC_TRANSPORTERS	KEGG_ABC_TRANSPORTERS		44	0.472174	1.2512	0.193294	0.391139	1	4671	tags=45%, list=23%, signal=59%
PID_AP1_PATHWAY	PID_AP1_PATHWAY		69	0.40859	1.24978	0.197292	0.393018	1	4954	tags=39%, list=24%, signal=51%
REACTOME_ACTIVATED_POINT_MUTANTS_OF_FGFR2	REACTOME_ACTIVATED_POINT_MUTANTS_OF_FGFR2		16	0.569435	1.24964	0.157895	0.39297	1	2626	tags=44%, list=13%, signal=50%
PID_HDAC_CLASSII_PATHWAY	PID_HDAC_CLASSII_PATHWAY		34	0.334603	1.24877	0.226908	0.393987	1	5108	tags=29%, list=25%, signal=39%
STAMBOLSKY_TARGETS_OF_MUTATED_TP53_DN	STAMBOLSKY_TARGETS_OF_MUTATED_TP53_DN		49	0.449216	1.24764	0.238589	0.39543	1	4430	tags=47%, list=22%, signal=60%
BIOCARTA_TNFR1_PATHWAY	BIOCARTA_TNFR1_PATHWAY		29	0.310276	1.24623	0.203593	0.397434	1	6978	tags=48%, list=34%, signal=73%
TAVOR_CEBPA_TARGETS_UP	TAVOR_CEBPA_TARGETS_UP		47	0.431756	1.24621	0.204365	0.397173	1	4885	tags=49%, list=24%, signal=64%
PID_ILK_PATHWAY	PID_ILK_PATHWAY		45	0.308689	1.24602	0.258687	0.397206	1	5008	tags=36%, list=24%, signal=47%
JOHANSSON_BRAIN_CANCER_EARLY_VS_LATE_DN	JOHANSSON_BRAIN_CANCER_EARLY_VS_LATE_DN		45	0.369311	1.24598	0.192534	0.396959	1	3670	tags=29%, list=18%, signal=35%
REACTOME_PRE_NOTCH_TRANSCRIPTION_AND_TRANSLATION	REACTOME_PRE_NOTCH_TRANSCRIPTION_AND_TRANSLATION		27	0.333396	1.24595	0.234615	0.396709	1	5340	tags=41%, list=26%, signal=55%
KEGG_PROGESTERONE_MEDIATED_OOCYTE_MATURATION	KEGG_PROGESTERONE_MEDIATED_OOCYTE_MATURATION		85	0.341561	1.24578	0.172676	0.39666	1	2457	tags=18%, list=12%, signal=20%
PID_INSULIN_PATHWAY	PID_INSULIN_PATHWAY		45	0.27774	1.24499	0.195736	0.39767	1	5704	tags=40%, list=28%, signal=55%
CASORELLI_ACUTE_PROMYELOCYTIC_LEUKEMIA_UP	CASORELLI_ACUTE_PROMYELOCYTIC_LEUKEMIA_UP		168	0.363916	1.24477	0.237805	0.397723	1	5314	tags=37%, list=26%, signal=49%
HINATA_NFKB_TARGETS_KERATINOCYTE_UP	HINATA_NFKB_TARGETS_KERATINOCYTE_UP		91	0.470007	1.24438	0.237548	0.398048	1	3275	tags=27%, list=16%, signal=33%
ZHAN_MULTIPLE_MYELOMA_LB_DN	ZHAN_MULTIPLE_MYELOMA_LB_DN		39	0.489001	1.24356	0.242915	0.399106	1	5737	tags=59%, list=28%, signal=82%
GRABARCZYK_BCL11B_TARGETS_DN	GRABARCZYK_BCL11B_TARGETS_DN		51	0.385349	1.2432	0.189621	0.399344	1	3525	tags=29%, list=17%, signal=35%
HOFFMANN_PRE_BI_TO_LARGE_PRE_BII_LYMPHOCYTE_DN	HOFFMANN_PRE_BI_TO_LARGE_PRE_BII_LYMPHOCYTE_DN		74	0.381177	1.24243	0.185484	0.400285	1	4691	tags=32%, list=23%, signal=42%
TORCHIA_TARGETS_OF_EWSR1_FLI1_FUSION_DN	TORCHIA_TARGETS_OF_EWSR1_FLI1_FUSION_DN		313	0.334641	1.2424	0.2	0.400034	1	5099	tags=35%, list=25%, signal=46%
CHEMNITZ_RESPONSE_TO_PROSTAGLANDIN_E2_DN	CHEMNITZ_RESPONSE_TO_PROSTAGLANDIN_E2_DN		365	0.332149	1.24187	0.150905	0.400594	1	4526	tags=29%, list=22%, signal=37%
MULLIGHAN_MLL_SIGNATURE_1_DN	MULLIGHAN_MLL_SIGNATURE_1_DN		234	0.352425	1.24161	0.199203	0.400724	1	4846	tags=32%, list=24%, signal=41%
MOLENAAR_TARGETS_OF_CCND1_AND_CDK4_UP	MOLENAAR_TARGETS_OF_CCND1_AND_CDK4_UP		64	0.38093	1.24138	0.183716	0.400781	1	4193	tags=30%, list=20%, signal=37%
DER_IFN_ALPHA_RESPONSE_UP	DER_IFN_ALPHA_RESPONSE_UP		70	0.439243	1.24113	0.283058	0.400809	1	5560	tags=44%, list=27%, signal=61%
FARMER_BREAST_CANCER_CLUSTER_6	FARMER_BREAST_CANCER_CLUSTER_6		15	0.688087	1.24105	0.290984	0.400636	1	5791	tags=80%, list=28%, signal=111%
BOYAULT_LIVER_CANCER_SUBCLASS_G12_UP	BOYAULT_LIVER_CANCER_SUBCLASS_G12_UP		38	0.296438	1.24092	0.205479	0.400549	1	1161	tags=8%, list=6%, signal=8%
ODONNELL_TFRC_TARGETS_UP	ODONNELL_TFRC_TARGETS_UP		399	0.353936	1.24073	0.169772	0.400519	1	4544	tags=32%, list=22%, signal=40%
SAFFORD_T_LYMPHOCYTE_ANERGY	SAFFORD_T_LYMPHOCYTE_ANERGY		87	0.394695	1.24027	0.17495	0.400909	1	4888	tags=32%, list=24%, signal=42%
PID_RAS_PATHWAY	PID_RAS_PATHWAY		30	0.431582	1.23924	0.188213	0.402229	1	4705	tags=33%, list=23%, signal=43%
KEGG_WNT_SIGNALING_PATHWAY	KEGG_WNT_SIGNALING_PATHWAY		150	0.347339	1.23899	0.160321	0.402352	1	3653	tags=24%, list=18%, signal=29%
KUROZUMI_RESPONSE_TO_ONCOCYTIC_VIRUS_AND_CYCLIC_RGD	KUROZUMI_RESPONSE_TO_ONCOCYTIC_VIRUS_AND_CYCLIC_RGD		20	0.695188	1.23886	0.268775	0.402244	1	2151	tags=50%, list=10%, signal=56%
KEGG_HEDGEHOG_SIGNALING_PATHWAY	KEGG_HEDGEHOG_SIGNALING_PATHWAY		56	0.471212	1.23877	0.20122	0.402092	1	2697	tags=30%, list=13%, signal=35%
KEGG_PANTOTHENATE_AND_COA_BIOSYNTHESIS	KEGG_PANTOTHENATE_AND_COA_BIOSYNTHESIS		16	0.502235	1.23794	0.220339	0.403141	1	2863	tags=44%, list=14%, signal=51%
REACTOME_NEUROTRANSMITTER_RECEPTOR_BINDING_AND_DOWNSTREAM_TRANSMISSION_IN_THE_POSTSYNAPTIC_CELL	REACTOME_NEUROTRANSMITTER_RECEPTOR_BINDING_AND_DOWNSTREAM_TRANSMISSION_IN_THE_POSTSYNAPTIC_CELL		135	0.404531	1.2378	0.144578	0.403056	1	2508	tags=23%, list=12%, signal=26%
DELPUECH_FOXO3_TARGETS_UP	DELPUECH_FOXO3_TARGETS_UP		68	0.350839	1.23745	0.200795	0.403269	1	5835	tags=44%, list=28%, signal=61%
PID_P38_ALPHA_BETA_PATHWAY	PID_P38_ALPHA_BETA_PATHWAY		31	0.404321	1.23639	0.221557	0.404655	1	5776	tags=39%, list=28%, signal=54%
BIOCARTA_CARM_ER_PATHWAY	BIOCARTA_CARM_ER_PATHWAY		35	0.330036	1.23619	0.213836	0.404679	1	3286	tags=26%, list=16%, signal=31%
REACTOME_PPARA_ACTIVATES_GENE_EXPRESSION	REACTOME_PPARA_ACTIVATES_GENE_EXPRESSION		104	0.285015	1.23593	0.198864	0.404806	1	4130	tags=23%, list=20%, signal=29%
WIERENGA_STAT5A_TARGETS_UP	WIERENGA_STAT5A_TARGETS_UP		213	0.401147	1.23573	0.210938	0.404854	1	4296	tags=37%, list=21%, signal=46%
BRUINS_UVC_RESPONSE_EARLY_LATE	BRUINS_UVC_RESPONSE_EARLY_LATE		306	0.225504	1.23542	0.125	0.405077	1	4300	tags=19%, list=21%, signal=24%
MCGARVEY_SILENCED_BY_METHYLATION_IN_COLON_CANCER	MCGARVEY_SILENCED_BY_METHYLATION_IN_COLON_CANCER		42	0.483435	1.23528	0.173664	0.405007	1	2560	tags=36%, list=12%, signal=41%
WANG_RESPONSE_TO_ANDROGEN_UP	WANG_RESPONSE_TO_ANDROGEN_UP		29	0.373422	1.23504	0.206751	0.405082	1	5442	tags=41%, list=27%, signal=56%
SCHAEFFER_PROSTATE_DEVELOPMENT_12HR_DN	SCHAEFFER_PROSTATE_DEVELOPMENT_12HR_DN		57	0.459415	1.23461	0.186747	0.405506	1	1881	tags=28%, list=9%, signal=31%
KEGG_LONG_TERM_DEPRESSION	KEGG_LONG_TERM_DEPRESSION		67	0.400787	1.23398	0.181275	0.406194	1	3844	tags=27%, list=19%, signal=33%
LABBE_WNT3A_TARGETS_DN	LABBE_WNT3A_TARGETS_DN		93	0.393855	1.23256	0.16501	0.408023	1	3247	tags=30%, list=16%, signal=36%
LENAOUR_DENDRITIC_CELL_MATURATION_UP	LENAOUR_DENDRITIC_CELL_MATURATION_UP		110	0.426455	1.23251	0.248	0.40782	1	5276	tags=39%, list=26%, signal=52%
IWANAGA_CARCINOGENESIS_BY_KRAS_PTEN_UP	IWANAGA_CARCINOGENESIS_BY_KRAS_PTEN_UP		177	0.312712	1.2318	0.119374	0.408645	1	3561	tags=23%, list=17%, signal=28%
SMIRNOV_RESPONSE_TO_IR_2HR_UP	SMIRNOV_RESPONSE_TO_IR_2HR_UP		49	0.372743	1.2314	0.242171	0.408961	1	3578	tags=24%, list=17%, signal=30%
ZHANG_ANTIVIRAL_RESPONSE_TO_RIBAVIRIN_DN	ZHANG_ANTIVIRAL_RESPONSE_TO_RIBAVIRIN_DN		51	0.435645	1.23114	0.228106	0.409074	1	4279	tags=39%, list=21%, signal=49%
MIKKELSEN_IPS_HCP_WITH_H3_UNMETHYLATED	MIKKELSEN_IPS_HCP_WITH_H3_UNMETHYLATED		78	0.438848	1.23105	0.148676	0.408948	1	4011	tags=36%, list=20%, signal=44%
LEE_LIVER_CANCER_DENA_UP	LEE_LIVER_CANCER_DENA_UP		59	0.411112	1.23099	0.201923	0.408748	1	4885	tags=44%, list=24%, signal=58%
FIGUEROA_AML_METHYLATION_CLUSTER_5_DN	FIGUEROA_AML_METHYLATION_CLUSTER_5_DN		46	0.458378	1.23098	0.173737	0.408486	1	4325	tags=37%, list=21%, signal=47%
REACTOME_SIGNALING_BY_ROBO_RECEPTOR	REACTOME_SIGNALING_BY_ROBO_RECEPTOR		29	0.367118	1.23067	0.213573	0.408672	1	5454	tags=38%, list=27%, signal=52%
SUZUKI_RESPONSE_TO_TSA	SUZUKI_RESPONSE_TO_TSA		20	0.420673	1.23065	0.19305	0.408418	1	3934	tags=30%, list=19%, signal=37%
MITSIADES_RESPONSE_TO_APLIDIN_UP	MITSIADES_RESPONSE_TO_APLIDIN_UP		423	0.258728	1.23028	0.215352	0.408688	1	5974	tags=33%, list=29%, signal=46%
MCCABE_HOXC6_TARGETS_CANCER_DN	MCCABE_HOXC6_TARGETS_CANCER_DN		19	0.333295	1.22972	0.212121	0.409283	1	2285	tags=21%, list=11%, signal=24%
SHIN_B_CELL_LYMPHOMA_CLUSTER_3	SHIN_B_CELL_LYMPHOMA_CLUSTER_3		28	0.505388	1.22971	0.270059	0.409018	1	4340	tags=43%, list=21%, signal=54%
FIGUEROA_AML_METHYLATION_CLUSTER_2_UP	FIGUEROA_AML_METHYLATION_CLUSTER_2_UP		53	0.399474	1.22892	0.195565	0.40999	1	1161	tags=17%, list=6%, signal=18%
WIKMAN_ASBESTOS_LUNG_CANCER_DN	WIKMAN_ASBESTOS_LUNG_CANCER_DN		27	0.467115	1.22862	0.300199	0.410189	1	4464	tags=37%, list=22%, signal=47%
GAZDA_DIAMOND_BLACKFAN_ANEMIA_PROGENITOR_UP	GAZDA_DIAMOND_BLACKFAN_ANEMIA_PROGENITOR_UP		36	0.379984	1.22789	0.263918	0.411049	1	4714	tags=33%, list=23%, signal=43%
KASLER_HDAC7_TARGETS_1_UP	KASLER_HDAC7_TARGETS_1_UP		190	0.314019	1.22762	0.235294	0.411165	1	3453	tags=22%, list=17%, signal=26%
REACTOME_TRANSPORT_OF_INORGANIC_CATIONS_ANIONS_AND_AMINO_ACIDS_OLIGOPEPTIDES	REACTOME_TRANSPORT_OF_INORGANIC_CATIONS_ANIONS_AND_AMINO_ACIDS_OLIGOPEPTIDES		93	0.390477	1.22755	0.133858	0.41099	1	2573	tags=24%, list=13%, signal=27%
SHAFFER_IRF4_MULTIPLE_MYELOMA_PROGRAM	SHAFFER_IRF4_MULTIPLE_MYELOMA_PROGRAM		36	0.423682	1.227	0.262646	0.411605	1	5519	tags=47%, list=27%, signal=65%
XU_RESPONSE_TO_TRETINOIN_UP	XU_RESPONSE_TO_TRETINOIN_UP		15	0.481535	1.2269	0.276265	0.41148	1	4511	tags=33%, list=22%, signal=43%
KASLER_HDAC7_TARGETS_2_DN	KASLER_HDAC7_TARGETS_2_DN		32	0.416394	1.22676	0.232323	0.411434	1	5840	tags=38%, list=28%, signal=52%
FIGUEROA_AML_METHYLATION_CLUSTER_3_UP	FIGUEROA_AML_METHYLATION_CLUSTER_3_UP		165	0.340112	1.22631	0.186879	0.411865	1	2831	tags=21%, list=14%, signal=24%
HAHTOLA_SEZARY_SYNDROM_UP	HAHTOLA_SEZARY_SYNDROM_UP		98	0.395264	1.22591	0.22428	0.412205	1	4628	tags=36%, list=23%, signal=46%
KYNG_ENVIRONMENTAL_STRESS_RESPONSE_NOT_BY_UV_IN_OLD	KYNG_ENVIRONMENTAL_STRESS_RESPONSE_NOT_BY_UV_IN_OLD		23	0.373566	1.22554	0.245283	0.412455	1	217	tags=9%, list=1%, signal=9%
BRUINS_UVC_RESPONSE_VIA_TP53_GROUP_D	BRUINS_UVC_RESPONSE_VIA_TP53_GROUP_D		272	0.333214	1.22539	0.122951	0.412395	1	3492	tags=23%, list=17%, signal=28%
REACTOME_ERK_MAPK_TARGETS	REACTOME_ERK_MAPK_TARGETS		21	0.377708	1.22493	0.267717	0.41281	1	6564	tags=43%, list=32%, signal=63%
KEGG_BETA_ALANINE_METABOLISM	KEGG_BETA_ALANINE_METABOLISM		22	0.4283	1.22435	0.214141	0.413465	1	2523	tags=27%, list=12%, signal=31%
REACTOME_FORMATION_OF_INCISION_COMPLEX_IN_GG_NER	REACTOME_FORMATION_OF_INCISION_COMPLEX_IN_GG_NER		21	0.380021	1.22382	0.262136	0.413965	1	2891	tags=19%, list=14%, signal=22%
HAN_JNK_SINGALING_DN	HAN_JNK_SINGALING_DN		39	0.48089	1.22368	0.235887	0.413895	1	2288	tags=36%, list=11%, signal=40%
BIOCARTA_AKT_PATHWAY	BIOCARTA_AKT_PATHWAY		22	0.396939	1.223	0.261297	0.414685	1	3721	tags=27%, list=18%, signal=33%
PID_ENDOTHELIN_PATHWAY	PID_ENDOTHELIN_PATHWAY		63	0.392411	1.22263	0.222437	0.414963	1	1545	tags=16%, list=8%, signal=17%
NEWMAN_ERCC6_TARGETS_UP	NEWMAN_ERCC6_TARGETS_UP		26	0.500121	1.22222	0.220648	0.415297	1	3217	tags=35%, list=16%, signal=41%
ISSAEVA_MLL2_TARGETS	ISSAEVA_MLL2_TARGETS		61	0.454896	1.22211	0.204724	0.415185	1	2407	tags=28%, list=12%, signal=31%
SANA_RESPONSE_TO_IFNG_UP	SANA_RESPONSE_TO_IFNG_UP		65	0.52322	1.22208	0.286853	0.414933	1	5419	tags=65%, list=26%, signal=88%
KEGG_BASAL_TRANSCRIPTION_FACTORS	KEGG_BASAL_TRANSCRIPTION_FACTORS		35	0.342336	1.2212	0.239923	0.416018	1	1511	tags=14%, list=7%, signal=15%
REACTOME_O_LINKED_GLYCOSYLATION_OF_MUCINS	REACTOME_O_LINKED_GLYCOSYLATION_OF_MUCINS		53	0.455136	1.22101	0.175781	0.416042	1	4314	tags=40%, list=21%, signal=50%
TONKS_TARGETS_OF_RUNX1_RUNX1T1_FUSION_MONOCYTE_UP	TONKS_TARGETS_OF_RUNX1_RUNX1T1_FUSION_MONOCYTE_UP		200	0.326875	1.22085	0.243083	0.416015	1	5026	tags=31%, list=25%, signal=40%
ZHAN_MULTIPLE_MYELOMA_CD1_AND_CD2_DN	ZHAN_MULTIPLE_MYELOMA_CD1_AND_CD2_DN		49	0.350105	1.22032	0.219802	0.416541	1	5345	tags=37%, list=26%, signal=50%
PID_EPHRINB_REV_PATHWAY	PID_EPHRINB_REV_PATHWAY		30	0.456386	1.22025	0.250471	0.416374	1	2672	tags=27%, list=13%, signal=31%
VANTVEER_BREAST_CANCER_METASTASIS_UP	VANTVEER_BREAST_CANCER_METASTASIS_UP		55	0.532371	1.21972	0.307851	0.41688	1	4132	tags=36%, list=20%, signal=45%
PICCALUGA_ANGIOIMMUNOBLASTIC_LYMPHOMA_DN	PICCALUGA_ANGIOIMMUNOBLASTIC_LYMPHOMA_DN		133	0.303037	1.21957	0.278656	0.416839	1	7014	tags=44%, list=34%, signal=66%
KEGG_TOLL_LIKE_RECEPTOR_SIGNALING_PATHWAY	KEGG_TOLL_LIKE_RECEPTOR_SIGNALING_PATHWAY		102	0.412825	1.21947	0.262	0.416693	1	3436	tags=25%, list=17%, signal=29%
KYNG_NORMAL_AGING_DN	KYNG_NORMAL_AGING_DN		29	0.344651	1.21853	0.189621	0.417869	1	6254	tags=48%, list=31%, signal=69%
HANSON_HRAS_SIGNALING_VIA_NFKB	HANSON_HRAS_SIGNALING_VIA_NFKB		21	0.473917	1.21795	0.207921	0.418493	1	3924	tags=57%, list=19%, signal=71%
ST_MYOCYTE_AD_PATHWAY	ST_MYOCYTE_AD_PATHWAY		27	0.445132	1.21751	0.188377	0.418867	1	5874	tags=48%, list=29%, signal=67%
LIM_MAMMARY_LUMINAL_MATURE_UP	LIM_MAMMARY_LUMINAL_MATURE_UP		115	0.460873	1.21745	0.270833	0.418695	1	5010	tags=43%, list=24%, signal=57%
RIZKI_TUMOR_INVASIVENESS_2D_DN	RIZKI_TUMOR_INVASIVENESS_2D_DN		62	0.321197	1.21639	0.184109	0.420069	1	3354	tags=21%, list=16%, signal=25%
SIG_REGULATION_OF_THE_ACTIN_CYTOSKELETON_BY_RHO_GTPASES	SIG_REGULATION_OF_THE_ACTIN_CYTOSKELETON_BY_RHO_GTPASES		35	0.398167	1.21598	0.238956	0.420478	1	4598	tags=31%, list=22%, signal=40%
BIOCARTA_ETS_PATHWAY	BIOCARTA_ETS_PATHWAY		18	0.382726	1.2153	0.244275	0.421297	1	3978	tags=33%, list=19%, signal=41%
PID_MYC_REPRESS_PATHWAY	PID_MYC_REPRESS_PATHWAY		63	0.303858	1.21489	0.204545	0.421641	1	4954	tags=30%, list=24%, signal=40%
GARGALOVIC_RESPONSE_TO_OXIDIZED_PHOSPHOLIPIDS_BLUE_UP	GARGALOVIC_RESPONSE_TO_OXIDIZED_PHOSPHOLIPIDS_BLUE_UP		133	0.275841	1.21447	0.22807	0.422001	1	6150	tags=36%, list=30%, signal=51%
BOYLAN_MULTIPLE_MYELOMA_D_CLUSTER_DN	BOYLAN_MULTIPLE_MYELOMA_D_CLUSTER_DN		40	0.337602	1.21411	0.228516	0.422257	1	4896	tags=35%, list=24%, signal=46%
RAY_TUMORIGENESIS_BY_ERBB2_CDC25A_UP	RAY_TUMORIGENESIS_BY_ERBB2_CDC25A_UP		103	0.360257	1.21402	0.159004	0.422109	1	4055	tags=32%, list=20%, signal=40%
MIKKELSEN_IPS_ICP_WITH_H3K4ME3_AND_H327ME3	MIKKELSEN_IPS_ICP_WITH_H3K4ME3_AND_H327ME3		125	0.441162	1.21399	0.178715	0.421887	1	3001	tags=38%, list=15%, signal=44%
YOKOE_CANCER_TESTIS_ANTIGENS	YOKOE_CANCER_TESTIS_ANTIGENS		33	0.412164	1.21351	0.192149	0.422389	1	2394	tags=21%, list=12%, signal=24%
DAVICIONI_PAX_FOXO1_SIGNATURE_IN_ARMS_DN	DAVICIONI_PAX_FOXO1_SIGNATURE_IN_ARMS_DN		20	0.502859	1.21332	0.223553	0.422411	1	4526	tags=45%, list=22%, signal=58%
BUCKANOVICH_T_LYMPHOCYTE_HOMING_ON_TUMOR_DN	BUCKANOVICH_T_LYMPHOCYTE_HOMING_ON_TUMOR_DN		23	0.42292	1.21322	0.221344	0.422282	1	2839	tags=26%, list=14%, signal=30%
MATSUDA_NATURAL_KILLER_DIFFERENTIATION	MATSUDA_NATURAL_KILLER_DIFFERENTIATION		472	0.327952	1.21307	0.225743	0.422244	1	4069	tags=26%, list=20%, signal=32%
SMID_BREAST_CANCER_RELAPSE_IN_BRAIN_DN	SMID_BREAST_CANCER_RELAPSE_IN_BRAIN_DN		79	0.580716	1.21264	0.319106	0.422637	1	4389	tags=51%, list=21%, signal=64%
FARMER_BREAST_CANCER_APOCRINE_VS_BASAL	FARMER_BREAST_CANCER_APOCRINE_VS_BASAL		323	0.312877	1.21187	0.166667	0.42357	1	4897	tags=32%, list=24%, signal=41%
GAUSSMANN_MLL_AF4_FUSION_TARGETS_B_UP	GAUSSMANN_MLL_AF4_FUSION_TARGETS_B_UP		26	0.466614	1.21171	0.213178	0.423535	1	2932	tags=27%, list=14%, signal=31%
AMIT_EGF_RESPONSE_480_MCF10A	AMIT_EGF_RESPONSE_480_MCF10A		43	0.380194	1.21168	0.205479	0.423285	1	3032	tags=21%, list=15%, signal=25%
FAELT_B_CLL_WITH_VH_REARRANGEMENTS_UP	FAELT_B_CLL_WITH_VH_REARRANGEMENTS_UP		46	0.339658	1.21165	0.242126	0.423042	1	6373	tags=43%, list=31%, signal=63%
ROSS_AML_WITH_CBFB_MYH11_FUSION	ROSS_AML_WITH_CBFB_MYH11_FUSION		51	0.478126	1.21144	0.292969	0.423077	1	3150	tags=37%, list=15%, signal=44%
RATTENBACHER_BOUND_BY_CELF1	RATTENBACHER_BOUND_BY_CELF1		421	0.279075	1.21138	0.137214	0.422872	1	3200	tags=19%, list=16%, signal=22%
PID_RHOA_REG_PATHWAY	PID_RHOA_REG_PATHWAY		44	0.33574	1.21115	0.23374	0.422934	1	5191	tags=41%, list=25%, signal=55%
GROSS_HYPOXIA_VIA_HIF1A_UP	GROSS_HYPOXIA_VIA_HIF1A_UP		73	0.239539	1.21095	0.227364	0.422979	1	3752	tags=14%, list=18%, signal=17%
REACTOME_SLC_MEDIATED_TRANSMEMBRANE_TRANSPORT	REACTOME_SLC_MEDIATED_TRANSMEMBRANE_TRANSPORT		240	0.345695	1.21043	0.117296	0.42356	1	2681	tags=22%, list=13%, signal=25%
VART_KSHV_INFECTION_ANGIOGENIC_MARKERS_DN	VART_KSHV_INFECTION_ANGIOGENIC_MARKERS_DN		137	0.414977	1.21016	0.200803	0.423684	1	4795	tags=46%, list=23%, signal=60%
KEGG_LEISHMANIA_INFECTION	KEGG_LEISHMANIA_INFECTION		58	0.461188	1.21001	0.288235	0.423578	1	3275	tags=31%, list=16%, signal=37%
KEGG_INOSITOL_PHOSPHATE_METABOLISM	KEGG_INOSITOL_PHOSPHATE_METABOLISM		54	0.316204	1.20975	0.215953	0.423711	1	5741	tags=43%, list=28%, signal=59%
REACTOME_TRANSMISSION_ACROSS_CHEMICAL_SYNAPSES	REACTOME_TRANSMISSION_ACROSS_CHEMICAL_SYNAPSES		184	0.389937	1.20918	0.16499	0.424372	1	2508	tags=23%, list=12%, signal=26%
BOQUEST_STEM_CELL_DN	BOQUEST_STEM_CELL_DN		205	0.424615	1.20865	0.306748	0.424935	1	4428	tags=39%, list=22%, signal=49%
TORCHIA_TARGETS_OF_EWSR1_FLI1_FUSION_TOP20_DN	TORCHIA_TARGETS_OF_EWSR1_FLI1_FUSION_TOP20_DN		18	0.464296	1.20841	0.25	0.425059	1	4705	tags=44%, list=23%, signal=58%
ELVIDGE_HIF1A_TARGETS_DN	ELVIDGE_HIF1A_TARGETS_DN		89	0.375554	1.20807	0.243564	0.425321	1	3298	tags=27%, list=16%, signal=32%
SHETH_LIVER_CANCER_VS_TXNIP_LOSS_PAM1	SHETH_LIVER_CANCER_VS_TXNIP_LOSS_PAM1		226	0.283247	1.20753	0.146199	0.425849	1	3796	tags=24%, list=19%, signal=29%
BIOCARTA_PML_PATHWAY	BIOCARTA_PML_PATHWAY		17	0.452959	1.2071	0.292308	0.426247	1	4858	tags=41%, list=24%, signal=54%
STAMBOLSKY_RESPONSE_TO_VITAMIN_D3_UP	STAMBOLSKY_RESPONSE_TO_VITAMIN_D3_UP		82	0.356722	1.20706	0.164461	0.426034	1	6541	tags=51%, list=32%, signal=75%
ST_G_ALPHA_I_PATHWAY	ST_G_ALPHA_I_PATHWAY		35	0.392552	1.20675	0.211268	0.426215	1	7654	tags=63%, list=37%, signal=100%
TAVAZOIE_METASTASIS	TAVAZOIE_METASTASIS		104	0.397331	1.20604	0.160321	0.427041	1	4429	tags=43%, list=22%, signal=55%
REACTOME_FORMATION_OF_FIBRIN_CLOT_CLOTTING_CASCADE	REACTOME_FORMATION_OF_FIBRIN_CLOT_CLOTTING_CASCADE		31	0.475708	1.20451	0.194118	0.429225	1	3017	tags=39%, list=15%, signal=45%
KEGG_PROPANOATE_METABOLISM	KEGG_PROPANOATE_METABOLISM		32	0.367295	1.20356	0.240816	0.430408	1	4574	tags=31%, list=22%, signal=40%
KEGG_BLADDER_CANCER	KEGG_BLADDER_CANCER		42	0.353401	1.20313	0.213725	0.430782	1	4296	tags=33%, list=21%, signal=42%
GRAHAM_NORMAL_QUIESCENT_VS_NORMAL_DIVIDING_UP	GRAHAM_NORMAL_QUIESCENT_VS_NORMAL_DIVIDING_UP		65	0.457482	1.2031	0.283433	0.430529	1	3846	tags=37%, list=19%, signal=45%
HOLLMANN_APOPTOSIS_VIA_CD40_DN	HOLLMANN_APOPTOSIS_VIA_CD40_DN		248	0.259762	1.2027	0.217054	0.430909	1	5735	tags=34%, list=28%, signal=46%
DEURIG_T_CELL_PROLYMPHOCYTIC_LEUKEMIA_DN	DEURIG_T_CELL_PROLYMPHOCYTIC_LEUKEMIA_DN		304	0.365409	1.20249	0.318091	0.430943	1	4494	tags=31%, list=22%, signal=39%
KANG_IMMORTALIZED_BY_TERT_DN	KANG_IMMORTALIZED_BY_TERT_DN		101	0.415152	1.20148	0.196154	0.432287	1	2404	tags=27%, list=12%, signal=30%
MANTOVANI_NFKB_TARGETS_UP	MANTOVANI_NFKB_TARGETS_UP		43	0.437529	1.20122	0.248016	0.432437	1	2903	tags=35%, list=14%, signal=41%
ZHAN_MULTIPLE_MYELOMA_UP	ZHAN_MULTIPLE_MYELOMA_UP		64	0.271539	1.20116	0.239583	0.432257	1	5822	tags=33%, list=28%, signal=46%
PEPPER_CHRONIC_LYMPHOCYTIC_LEUKEMIA_DN	PEPPER_CHRONIC_LYMPHOCYTIC_LEUKEMIA_DN		21	0.491696	1.19999	0.201961	0.433814	1	2982	tags=33%, list=15%, signal=39%
JAZAG_TGFB1_SIGNALING_UP	JAZAG_TGFB1_SIGNALING_UP		105	0.314009	1.19981	0.184261	0.433818	1	3033	tags=20%, list=15%, signal=23%
BIOCARTA_HIF_PATHWAY	BIOCARTA_HIF_PATHWAY		15	0.422848	1.19953	0.273743	0.433943	1	8528	tags=73%, list=42%, signal=125%
YAMASHITA_METHYLATED_IN_PROSTATE_CANCER	YAMASHITA_METHYLATED_IN_PROSTATE_CANCER		57	0.453563	1.19952	0.22093	0.43368	1	2617	tags=32%, list=13%, signal=36%
SIG_PIP3_SIGNALING_IN_B_LYMPHOCYTES	SIG_PIP3_SIGNALING_IN_B_LYMPHOCYTES		36	0.412886	1.19945	0.27621	0.433489	1	4114	tags=39%, list=20%, signal=49%
KEGG_CALCIUM_SIGNALING_PATHWAY	KEGG_CALCIUM_SIGNALING_PATHWAY		177	0.407109	1.19885	0.198819	0.434139	1	2310	tags=24%, list=11%, signal=27%
RADAEVA_RESPONSE_TO_IFNA1_UP	RADAEVA_RESPONSE_TO_IFNA1_UP		50	0.48741	1.19885	0.316973	0.433851	1	5445	tags=56%, list=27%, signal=76%
CHIANG_LIVER_CANCER_SUBCLASS_CTNNB1_UP	CHIANG_LIVER_CANCER_SUBCLASS_CTNNB1_UP		171	0.388444	1.19829	0.195565	0.434458	1	2785	tags=25%, list=14%, signal=28%
PYEON_CANCER_HEAD_AND_NECK_VS_CERVICAL_DN	PYEON_CANCER_HEAD_AND_NECK_VS_CERVICAL_DN		28	0.539377	1.19814	0.236111	0.434418	1	2447	tags=36%, list=12%, signal=40%
YAN_ESCAPE_FROM_ANOIKIS	YAN_ESCAPE_FROM_ANOIKIS		22	0.535422	1.19807	0.320158	0.43423	1	3996	tags=55%, list=19%, signal=68%
SABATES_COLORECTAL_ADENOMA_SIZE_UP	SABATES_COLORECTAL_ADENOMA_SIZE_UP		22	0.400356	1.198	0.221053	0.434081	1	3538	tags=27%, list=17%, signal=33%
MA_PITUITARY_FETAL_VS_ADULT_DN	MA_PITUITARY_FETAL_VS_ADULT_DN		19	0.404791	1.19783	0.270633	0.434072	1	685	tags=11%, list=3%, signal=11%
ST_TUMOR_NECROSIS_FACTOR_PATHWAY	ST_TUMOR_NECROSIS_FACTOR_PATHWAY		28	0.372666	1.19718	0.304	0.434875	1	6496	tags=50%, list=32%, signal=73%
VALK_AML_CLUSTER_1	VALK_AML_CLUSTER_1		27	0.500349	1.19714	0.265873	0.434652	1	3323	tags=37%, list=16%, signal=44%
REACTOME_ACTIVATED_TAK1_MEDIATES_P38_MAPK_ACTIVATION	REACTOME_ACTIVATED_TAK1_MEDIATES_P38_MAPK_ACTIVATION		17	0.39314	1.19709	0.271984	0.434444	1	6496	tags=53%, list=32%, signal=77%
GAL_LEUKEMIC_STEM_CELL_DN	GAL_LEUKEMIC_STEM_CELL_DN		235	0.408712	1.19704	0.260038	0.434235	1	2584	tags=28%, list=13%, signal=32%
FONTAINE_THYROID_TUMOR_UNCERTAIN_MALIGNANCY_DN	FONTAINE_THYROID_TUMOR_UNCERTAIN_MALIGNANCY_DN		26	0.479	1.19695	0.244489	0.434094	1	4711	tags=46%, list=23%, signal=60%
WATTEL_AUTONOMOUS_THYROID_ADENOMA_DN	WATTEL_AUTONOMOUS_THYROID_ADENOMA_DN		54	0.441371	1.19691	0.273092	0.433889	1	1846	tags=20%, list=9%, signal=22%
LABBE_TGFB1_TARGETS_DN	LABBE_TGFB1_TARGETS_DN		107	0.365132	1.19677	0.170974	0.433821	1	3231	tags=25%, list=16%, signal=30%
KAAB_FAILED_HEART_ATRIUM_DN	KAAB_FAILED_HEART_ATRIUM_DN		140	0.212677	1.19673	0.239604	0.43359	1	5081	tags=27%, list=25%, signal=36%
BIOCARTA_INSULIN_PATHWAY	BIOCARTA_INSULIN_PATHWAY		22	0.354046	1.19652	0.273622	0.433662	1	2412	tags=14%, list=12%, signal=15%
PID_HEDGEHOG_2PATHWAY	PID_HEDGEHOG_2PATHWAY		22	0.48821	1.1964	0.254369	0.43356	1	3527	tags=36%, list=17%, signal=44%
XU_RESPONSE_TO_TRETINOIN_AND_NSC682994_UP	XU_RESPONSE_TO_TRETINOIN_AND_NSC682994_UP		17	0.452001	1.1963	0.288306	0.433438	1	4743	tags=53%, list=23%, signal=69%
REACTOME_DIABETES_PATHWAYS	REACTOME_DIABETES_PATHWAYS		128	0.25508	1.19543	0.219885	0.434523	1	4710	tags=27%, list=23%, signal=35%
MODY_HIPPOCAMPUS_NEONATAL	MODY_HIPPOCAMPUS_NEONATAL		35	0.43885	1.19473	0.268102	0.435328	1	3626	tags=31%, list=18%, signal=38%
WANG_HCP_PROSTATE_CANCER	WANG_HCP_PROSTATE_CANCER		110	0.322793	1.19473	0.199195	0.435042	1	4418	tags=28%, list=22%, signal=36%
BIOCARTA_VEGF_PATHWAY	BIOCARTA_VEGF_PATHWAY		29	0.347753	1.19435	0.29771	0.435317	1	8055	tags=55%, list=39%, signal=91%
BOYLAN_MULTIPLE_MYELOMA_D_UP	BOYLAN_MULTIPLE_MYELOMA_D_UP		87	0.297923	1.19402	0.2	0.43553	1	3314	tags=25%, list=16%, signal=30%
LINDGREN_BLADDER_CANCER_CLUSTER_1_UP	LINDGREN_BLADDER_CANCER_CLUSTER_1_UP		116	0.277959	1.19358	0.220676	0.435948	1	5599	tags=36%, list=27%, signal=50%
XU_GH1_EXOGENOUS_TARGETS_DN	XU_GH1_EXOGENOUS_TARGETS_DN		118	0.353879	1.19349	0.162978	0.435802	1	2346	tags=19%, list=11%, signal=22%
REACTOME_RAP1_SIGNALLING	REACTOME_RAP1_SIGNALLING		16	0.472697	1.19324	0.239437	0.435887	1	641	tags=13%, list=3%, signal=13%
KIM_MYCN_AMPLIFICATION_TARGETS_UP	KIM_MYCN_AMPLIFICATION_TARGETS_UP		92	0.379126	1.19296	0.206413	0.436082	1	4509	tags=39%, list=22%, signal=50%
REACTOME_FGFR_LIGAND_BINDING_AND_ACTIVATION	REACTOME_FGFR_LIGAND_BINDING_AND_ACTIVATION		22	0.514456	1.19291	0.186139	0.435869	1	1707	tags=32%, list=8%, signal=35%
KYNG_DNA_DAMAGE_DN	KYNG_DNA_DAMAGE_DN		193	0.29238	1.19049	0.258893	0.439448	1	4205	tags=23%, list=21%, signal=29%
WANG_LMO4_TARGETS_UP	WANG_LMO4_TARGETS_UP		348	0.203376	1.1898	0.190196	0.440272	1	5351	tags=26%, list=26%, signal=34%
KEGG_PHOSPHATIDYLINOSITOL_SIGNALING_SYSTEM	KEGG_PHOSPHATIDYLINOSITOL_SIGNALING_SYSTEM		76	0.329619	1.18964	0.224949	0.44028	1	6261	tags=43%, list=31%, signal=62%
HWANG_PROSTATE_CANCER_MARKERS	HWANG_PROSTATE_CANCER_MARKERS		28	0.352388	1.18944	0.264822	0.440285	1	4808	tags=39%, list=23%, signal=51%
HAHTOLA_MYCOSIS_FUNGOIDES_CD4_UP	HAHTOLA_MYCOSIS_FUNGOIDES_CD4_UP		62	0.433947	1.18911	0.316306	0.440537	1	3153	tags=31%, list=15%, signal=36%
HELLER_HDAC_TARGETS_SILENCED_BY_METHYLATION_DN	HELLER_HDAC_TARGETS_SILENCED_BY_METHYLATION_DN		274	0.339282	1.18884	0.270059	0.440668	1	4538	tags=31%, list=22%, signal=39%
ZHOU_INFLAMMATORY_RESPONSE_FIMA_DN	ZHOU_INFLAMMATORY_RESPONSE_FIMA_DN		265	0.298761	1.18879	0.202811	0.440453	1	5073	tags=32%, list=25%, signal=42%
KYNG_ENVIRONMENTAL_STRESS_RESPONSE_UP	KYNG_ENVIRONMENTAL_STRESS_RESPONSE_UP		55	0.302059	1.18812	0.252988	0.441231	1	2179	tags=15%, list=11%, signal=16%
TAYLOR_METHYLATED_IN_ACUTE_LYMPHOBLASTIC_LEUKEMIA	TAYLOR_METHYLATED_IN_ACUTE_LYMPHOBLASTIC_LEUKEMIA		74	0.334285	1.18787	0.194605	0.441304	1	3012	tags=20%, list=15%, signal=24%
REACTOME_SHC_MEDIATED_CASCADE	REACTOME_SHC_MEDIATED_CASCADE		28	0.467604	1.18754	0.194059	0.441548	1	1707	tags=25%, list=8%, signal=27%
BARIS_THYROID_CANCER_UP	BARIS_THYROID_CANCER_UP		23	0.345813	1.18741	0.257085	0.441454	1	5798	tags=39%, list=28%, signal=54%
SHETH_LIVER_CANCER_VS_TXNIP_LOSS_PAM3	SHETH_LIVER_CANCER_VS_TXNIP_LOSS_PAM3		69	0.38694	1.1874	0.207767	0.441188	1	3350	tags=30%, list=16%, signal=36%
GOLDRATH_HOMEOSTATIC_PROLIFERATION	GOLDRATH_HOMEOSTATIC_PROLIFERATION		169	0.197291	1.18726	0.242188	0.441127	1	5321	tags=25%, list=26%, signal=33%
ROZANOV_MMP14_TARGETS_DN	ROZANOV_MMP14_TARGETS_DN		35	0.42709	1.18719	0.23299	0.440949	1	3525	tags=37%, list=17%, signal=45%
SPIRA_SMOKERS_LUNG_CANCER_DN	SPIRA_SMOKERS_LUNG_CANCER_DN		21	0.418588	1.1869	0.261569	0.441095	1	2353	tags=24%, list=11%, signal=27%
FONTAINE_PAPILLARY_THYROID_CARCINOMA_UP	FONTAINE_PAPILLARY_THYROID_CARCINOMA_UP		62	0.378961	1.18665	0.245509	0.4412	1	3062	tags=24%, list=15%, signal=28%
MIDORIKAWA_AMPLIFIED_IN_LIVER_CANCER	MIDORIKAWA_AMPLIFIED_IN_LIVER_CANCER		53	0.37028	1.18608	0.256757	0.441838	1	6731	tags=55%, list=33%, signal=81%
REACTOME_NEGATIVE_REGULATORS_OF_RIG_I_MDA5_SIGNALING	REACTOME_NEGATIVE_REGULATORS_OF_RIG_I_MDA5_SIGNALING		30	0.370399	1.1853	0.299376	0.442775	1	5930	tags=43%, list=29%, signal=61%
LEIN_PONS_MARKERS	LEIN_PONS_MARKERS		89	0.362154	1.18527	0.190574	0.442557	1	2601	tags=24%, list=13%, signal=27%
KEGG_GLYCOSAMINOGLYCAN_BIOSYNTHESIS_HEPARAN_SULFATE	KEGG_GLYCOSAMINOGLYCAN_BIOSYNTHESIS_HEPARAN_SULFATE		26	0.430027	1.18524	0.260618	0.442315	1	5124	tags=42%, list=25%, signal=56%
PID_NEPHRIN_NEPH1_PATHWAY	PID_NEPHRIN_NEPH1_PATHWAY		31	0.329706	1.1833	0.242	0.44513	1	7204	tags=48%, list=35%, signal=74%
AMIT_EGF_RESPONSE_480_HELA	AMIT_EGF_RESPONSE_480_HELA		161	0.298162	1.18295	0.306985	0.445384	1	5681	tags=35%, list=28%, signal=49%
SU_PLACENTA	SU_PLACENTA		29	0.441383	1.18287	0.180747	0.445236	1	3372	tags=38%, list=16%, signal=45%
VALK_AML_CLUSTER_9	VALK_AML_CLUSTER_9		35	0.478126	1.18255	0.294118	0.445483	1	4067	tags=46%, list=20%, signal=57%
PARK_TRETINOIN_RESPONSE_AND_PML_RARA_FUSION	PARK_TRETINOIN_RESPONSE_AND_PML_RARA_FUSION		30	0.476389	1.18238	0.345238	0.445458	1	5483	tags=47%, list=27%, signal=64%
RAMALHO_STEMNESS_DN	RAMALHO_STEMNESS_DN		74	0.413708	1.18158	0.293307	0.446433	1	4737	tags=39%, list=23%, signal=51%
SMID_BREAST_CANCER_LUMINAL_B_UP	SMID_BREAST_CANCER_LUMINAL_B_UP		169	0.548679	1.18156	0.334016	0.446165	1	4193	tags=50%, list=20%, signal=62%
LEE_NAIVE_T_LYMPHOCYTE	LEE_NAIVE_T_LYMPHOCYTE		19	0.514538	1.1812	0.268482	0.44641	1	6151	tags=63%, list=30%, signal=90%
BRUECKNER_TARGETS_OF_MIRLET7A3_UP	BRUECKNER_TARGETS_OF_MIRLET7A3_UP		111	0.321674	1.18042	0.225049	0.447368	1	5360	tags=38%, list=26%, signal=51%
REACTOME_AMINO_ACID_AND_OLIGOPEPTIDE_SLC_TRANSPORTERS	REACTOME_AMINO_ACID_AND_OLIGOPEPTIDE_SLC_TRANSPORTERS		49	0.414143	1.18032	0.21124	0.447228	1	2573	tags=27%, list=13%, signal=30%
REACTOME_TRANSPORT_OF_GLUCOSE_AND_OTHER_SUGARS_BILE_SALTS_AND_ORGANIC_ACIDS_METAL_IONS_AND_AMINE_COMPOUNDS	REACTOME_TRANSPORT_OF_GLUCOSE_AND_OTHER_SUGARS_BILE_SALTS_AND_ORGANIC_ACIDS_METAL_IONS_AND_AMINE_COMPOUNDS		89	0.39233	1.18021	0.162698	0.447112	1	2681	tags=30%, list=13%, signal=35%
BIOCARTA_MYOSIN_PATHWAY	BIOCARTA_MYOSIN_PATHWAY		31	0.37638	1.17979	0.276289	0.447535	1	4459	tags=39%, list=22%, signal=49%
BIOCARTA_STRESS_PATHWAY	BIOCARTA_STRESS_PATHWAY		25	0.343629	1.17975	0.286869	0.447305	1	6298	tags=40%, list=31%, signal=58%
MORI_LARGE_PRE_BII_LYMPHOCYTE_DN	MORI_LARGE_PRE_BII_LYMPHOCYTE_DN		55	0.484139	1.179	0.364356	0.448258	1	4558	tags=49%, list=22%, signal=63%
KYNG_WERNER_SYNDROM_AND_NORMAL_AGING_UP	KYNG_WERNER_SYNDROM_AND_NORMAL_AGING_UP		91	0.286083	1.17868	0.237525	0.448467	1	4915	tags=26%, list=24%, signal=35%
LIANG_HEMATOPOIESIS_STEM_CELL_NUMBER_LARGE_VS_TINY_UP	LIANG_HEMATOPOIESIS_STEM_CELL_NUMBER_LARGE_VS_TINY_UP		43	0.363067	1.17829	0.246753	0.448806	1	3897	tags=30%, list=19%, signal=37%
ALONSO_METASTASIS_DN	ALONSO_METASTASIS_DN		26	0.48327	1.17824	0.270428	0.448602	1	4420	tags=50%, list=22%, signal=64%
ST_GAQ_PATHWAY	ST_GAQ_PATHWAY		27	0.344505	1.17819	0.262956	0.448386	1	5396	tags=37%, list=26%, signal=50%
MARIADASON_REGULATED_BY_HISTONE_ACETYLATION_DN	MARIADASON_REGULATED_BY_HISTONE_ACETYLATION_DN		50	0.278047	1.17745	0.235887	0.449272	1	693	tags=6%, list=3%, signal=6%
BIOCARTA_GPCR_PATHWAY	BIOCARTA_GPCR_PATHWAY		34	0.356249	1.17737	0.25636	0.449094	1	5538	tags=35%, list=27%, signal=48%
ZHAN_MULTIPLE_MYELOMA_CD1_AND_CD2_UP	ZHAN_MULTIPLE_MYELOMA_CD1_AND_CD2_UP		85	0.302771	1.17719	0.286004	0.449071	1	6026	tags=40%, list=29%, signal=56%
GUILLAUMOND_KLF10_TARGETS_DN	GUILLAUMOND_KLF10_TARGETS_DN		27	0.433694	1.17718	0.286573	0.448797	1	3167	tags=26%, list=15%, signal=31%
KEGG_DORSO_VENTRAL_AXIS_FORMATION	KEGG_DORSO_VENTRAL_AXIS_FORMATION		24	0.410635	1.17705	0.276423	0.448734	1	6886	tags=58%, list=34%, signal=88%
GROSS_ELK3_TARGETS_DN	GROSS_ELK3_TARGETS_DN		32	0.43474	1.17677	0.281746	0.448911	1	3298	tags=31%, list=16%, signal=37%
VERHAAK_GLIOBLASTOMA_CLASSICAL	VERHAAK_GLIOBLASTOMA_CLASSICAL		162	0.341689	1.17614	0.26494	0.449651	1	4004	tags=25%, list=20%, signal=31%
BURTON_ADIPOGENESIS_10	BURTON_ADIPOGENESIS_10		29	0.339086	1.17599	0.284519	0.449606	1	6773	tags=48%, list=33%, signal=72%
MIKKELSEN_ES_ICP_WITH_H3K4ME3_AND_H3K27ME3	MIKKELSEN_ES_ICP_WITH_H3K4ME3_AND_H3K27ME3		134	0.415827	1.17548	0.219608	0.450077	1	2477	tags=31%, list=12%, signal=35%
TAKAO_RESPONSE_TO_UVB_RADIATION_DN	TAKAO_RESPONSE_TO_UVB_RADIATION_DN		97	0.244426	1.17525	0.283809	0.450177	1	4843	tags=21%, list=24%, signal=27%
REACTOME_SIGNALING_BY_FGFR1_MUTANTS	REACTOME_SIGNALING_BY_FGFR1_MUTANTS		28	0.388699	1.17512	0.272031	0.450077	1	5745	tags=43%, list=28%, signal=59%
GERHOLD_ADIPOGENESIS_UP	GERHOLD_ADIPOGENESIS_UP		49	0.411943	1.17386	0.282	0.451786	1	4805	tags=41%, list=23%, signal=53%
BOWIE_RESPONSE_TO_TAMOXIFEN	BOWIE_RESPONSE_TO_TAMOXIFEN		18	0.648933	1.1735	0.356688	0.452098	1	5287	tags=67%, list=26%, signal=90%
BIOCARTA_PYK2_PATHWAY	BIOCARTA_PYK2_PATHWAY		28	0.28581	1.17345	0.238835	0.451883	1	8090	tags=46%, list=39%, signal=77%
DOANE_BREAST_CANCER_CLASSES_UP	DOANE_BREAST_CANCER_CLASSES_UP		70	0.539112	1.17344	0.316327	0.45161	1	4736	tags=56%, list=23%, signal=72%
PID_S1P_META_PATHWAY	PID_S1P_META_PATHWAY		21	0.415258	1.17343	0.278557	0.451328	1	4459	tags=43%, list=22%, signal=55%
LE_NEURONAL_DIFFERENTIATION_UP	LE_NEURONAL_DIFFERENTIATION_UP		18	0.514816	1.17277	0.269155	0.452043	1	803	tags=22%, list=4%, signal=23%
ALFANO_MYC_TARGETS	ALFANO_MYC_TARGETS		237	0.250313	1.17256	0.225191	0.452103	1	4289	tags=23%, list=21%, signal=28%
BIOCARTA_PTDINS_PATHWAY	BIOCARTA_PTDINS_PATHWAY		23	0.299555	1.17249	0.258893	0.45191	1	6127	tags=39%, list=30%, signal=56%
EBAUER_MYOGENIC_TARGETS_OF_PAX3_FOXO1_FUSION	EBAUER_MYOGENIC_TARGETS_OF_PAX3_FOXO1_FUSION		49	0.475539	1.1724	0.290389	0.451764	1	4156	tags=45%, list=20%, signal=56%
PODAR_RESPONSE_TO_ADAPHOSTIN_UP	PODAR_RESPONSE_TO_ADAPHOSTIN_UP		144	0.293888	1.17217	0.269939	0.451837	1	5357	tags=33%, list=26%, signal=44%
CROONQUIST_NRAS_VS_STROMAL_STIMULATION_UP	CROONQUIST_NRAS_VS_STROMAL_STIMULATION_UP		39	0.431585	1.17149	0.282651	0.452593	1	4658	tags=46%, list=23%, signal=60%
REACTOME_NEUROTRANSMITTER_RELEASE_CYCLE	REACTOME_NEUROTRANSMITTER_RELEASE_CYCLE		34	0.454365	1.17092	0.240246	0.453279	1	2346	tags=32%, list=11%, signal=36%
NAGASHIMA_NRG1_SIGNALING_UP	NAGASHIMA_NRG1_SIGNALING_UP		174	0.343012	1.17091	0.28125	0.453001	1	3163	tags=20%, list=15%, signal=24%
HAHTOLA_MYCOSIS_FUNGOIDES_CD4_DN	HAHTOLA_MYCOSIS_FUNGOIDES_CD4_DN		114	0.207991	1.17055	0.288577	0.453269	1	6871	tags=30%, list=34%, signal=45%
MAHADEVAN_IMATINIB_RESISTANCE_DN	MAHADEVAN_IMATINIB_RESISTANCE_DN		20	0.533338	1.17039	0.293886	0.45323	1	2600	tags=45%, list=13%, signal=51%
FARMER_BREAST_CANCER_CLUSTER_5	FARMER_BREAST_CANCER_CLUSTER_5		17	0.539276	1.17012	0.381663	0.453399	1	7797	tags=71%, list=38%, signal=114%
DORN_ADENOVIRUS_INFECTION_12HR_DN	DORN_ADENOVIRUS_INFECTION_12HR_DN		32	0.362899	1.16989	0.274747	0.453487	1	3233	tags=19%, list=16%, signal=22%
BAE_BRCA1_TARGETS_UP	BAE_BRCA1_TARGETS_UP		73	0.270625	1.16975	0.259635	0.453392	1	6134	tags=38%, list=30%, signal=55%
FINETTI_BREAST_CANCERS_KINOME_BLUE	FINETTI_BREAST_CANCERS_KINOME_BLUE		21	0.570283	1.16961	0.349174	0.453343	1	2621	tags=33%, list=13%, signal=38%
CHARAFE_BREAST_CANCER_LUMINAL_VS_BASAL_DN	CHARAFE_BREAST_CANCER_LUMINAL_VS_BASAL_DN		442	0.426306	1.16831	0.318548	0.455181	1	4440	tags=38%, list=22%, signal=47%
PRAMOONJAGO_SOX4_TARGETS_UP	PRAMOONJAGO_SOX4_TARGETS_UP		51	0.329431	1.16754	0.277328	0.456102	1	6333	tags=39%, list=31%, signal=57%
REACTOME_CELL_CELL_COMMUNICATION	REACTOME_CELL_CELL_COMMUNICATION		118	0.339607	1.16754	0.234714	0.455818	1	4876	tags=30%, list=24%, signal=39%
NATSUME_RESPONSE_TO_INTERFERON_BETA_UP	NATSUME_RESPONSE_TO_INTERFERON_BETA_UP		69	0.361257	1.1668	0.251037	0.456735	1	3888	tags=29%, list=19%, signal=36%
WANG_ESOPHAGUS_CANCER_VS_NORMAL_DN	WANG_ESOPHAGUS_CANCER_VS_NORMAL_DN		100	0.267314	1.16668	0.256654	0.456642	1	2935	tags=13%, list=14%, signal=15%
MANTOVANI_VIRAL_GPCR_SIGNALING_UP	MANTOVANI_VIRAL_GPCR_SIGNALING_UP		85	0.38577	1.1663	0.233333	0.456982	1	4648	tags=44%, list=23%, signal=56%
SMID_BREAST_CANCER_ERBB2_UP	SMID_BREAST_CANCER_ERBB2_UP		137	0.441181	1.16545	0.295547	0.458079	1	4909	tags=44%, list=24%, signal=57%
ZHANG_TLX_TARGETS_36HR_UP	ZHANG_TLX_TARGETS_36HR_UP		220	0.27991	1.16486	0.257085	0.458746	1	5822	tags=32%, list=28%, signal=45%
SCHAEFFER_PROSTATE_DEVELOPMENT_48HR_UP	SCHAEFFER_PROSTATE_DEVELOPMENT_48HR_UP		478	0.331806	1.16482	0.184	0.45852	1	3654	tags=26%, list=18%, signal=31%
WANG_TNF_TARGETS	WANG_TNF_TARGETS		24	0.482485	1.16473	0.279297	0.458399	1	2584	tags=25%, list=13%, signal=29%
LEE_RECENT_THYMIC_EMIGRANT	LEE_RECENT_THYMIC_EMIGRANT		217	0.302962	1.16453	0.285437	0.458434	1	4620	tags=30%, list=23%, signal=39%
REACTOME_NEGATIVE_REGULATION_OF_FGFR_SIGNALING	REACTOME_NEGATIVE_REGULATION_OF_FGFR_SIGNALING		36	0.423044	1.16448	0.24165	0.45821	1	1707	tags=19%, list=8%, signal=21%
GARGALOVIC_RESPONSE_TO_OXIDIZED_PHOSPHOLIPIDS_GREY_DN	GARGALOVIC_RESPONSE_TO_OXIDIZED_PHOSPHOLIPIDS_GREY_DN		71	0.396798	1.1636	0.257732	0.459308	1	3638	tags=37%, list=18%, signal=44%
GARGALOVIC_RESPONSE_TO_OXIDIZED_PHOSPHOLIPIDS_RED_DN	GARGALOVIC_RESPONSE_TO_OXIDIZED_PHOSPHOLIPIDS_RED_DN		25	0.433504	1.16344	0.322709	0.459262	1	7527	tags=68%, list=37%, signal=107%
WIERENGA_STAT5A_TARGETS_DN	WIERENGA_STAT5A_TARGETS_DN		207	0.366737	1.16321	0.27767	0.459348	1	3233	tags=26%, list=16%, signal=31%
DAVICIONI_RHABDOMYOSARCOMA_PAX_FOXO1_FUSION_UP	DAVICIONI_RHABDOMYOSARCOMA_PAX_FOXO1_FUSION_UP		64	0.362525	1.163	0.2249	0.459393	1	3895	tags=31%, list=19%, signal=38%
WANG_RESPONSE_TO_FORSKOLIN_UP	WANG_RESPONSE_TO_FORSKOLIN_UP		23	0.381546	1.16196	0.301205	0.460772	1	3386	tags=26%, list=17%, signal=31%
REACTOME_GABA_SYNTHESIS_RELEASE_REUPTAKE_AND_DEGRADATION	REACTOME_GABA_SYNTHESIS_RELEASE_REUPTAKE_AND_DEGRADATION		17	0.484423	1.16178	0.258873	0.460786	1	2346	tags=29%, list=11%, signal=33%
BIOCARTA_MTOR_PATHWAY	BIOCARTA_MTOR_PATHWAY		23	0.29354	1.16166	0.220408	0.46067	1	6604	tags=52%, list=32%, signal=77%
YAMASHITA_LIVER_CANCER_WITH_EPCAM_DN	YAMASHITA_LIVER_CANCER_WITH_EPCAM_DN		16	0.515248	1.16138	0.262231	0.460829	1	2329	tags=31%, list=11%, signal=35%
ST_INTERLEUKIN_4_PATHWAY	ST_INTERLEUKIN_4_PATHWAY		26	0.374111	1.15958	0.310757	0.463411	1	4666	tags=35%, list=23%, signal=45%
ALONSO_METASTASIS_NEURAL_UP	ALONSO_METASTASIS_NEURAL_UP		18	0.454183	1.15936	0.325253	0.463459	1	2766	tags=39%, list=13%, signal=45%
BIOCARTA_IGF1MTOR_PATHWAY	BIOCARTA_IGF1MTOR_PATHWAY		20	0.322506	1.15878	0.272912	0.464114	1	6641	tags=50%, list=32%, signal=74%
LEE_AGING_CEREBELLUM_UP	LEE_AGING_CEREBELLUM_UP		82	0.338275	1.15842	0.265469	0.464423	1	5385	tags=39%, list=26%, signal=53%
TONKS_TARGETS_OF_RUNX1_RUNX1T1_FUSION_ERYTHROCYTE_DN	TONKS_TARGETS_OF_RUNX1_RUNX1T1_FUSION_ERYTHROCYTE_DN		16	0.479208	1.1582	0.278884	0.464461	1	3121	tags=31%, list=15%, signal=37%
LEIN_MEDULLA_MARKERS	LEIN_MEDULLA_MARKERS		80	0.343092	1.15789	0.21875	0.464689	1	3591	tags=28%, list=18%, signal=33%
ZHAN_MULTIPLE_MYELOMA_CD1_VS_CD2_UP	ZHAN_MULTIPLE_MYELOMA_CD1_VS_CD2_UP		64	0.393477	1.15755	0.263581	0.464976	1	3016	tags=31%, list=15%, signal=37%
VALK_AML_CLUSTER_12	VALK_AML_CLUSTER_12		29	0.464358	1.15742	0.309572	0.464908	1	5229	tags=45%, list=26%, signal=60%
LIANG_SILENCED_BY_METHYLATION_2	LIANG_SILENCED_BY_METHYLATION_2		53	0.475089	1.15737	0.29783	0.464711	1	4846	tags=49%, list=24%, signal=64%
MEISSNER_BRAIN_HCP_WITH_H3K4ME2_AND_H3K27ME3	MEISSNER_BRAIN_HCP_WITH_H3K4ME2_AND_H3K27ME3		59	0.430459	1.15625	0.223092	0.466263	1	2911	tags=34%, list=14%, signal=39%
WEINMANN_ADAPTATION_TO_HYPOXIA_UP	WEINMANN_ADAPTATION_TO_HYPOXIA_UP		29	0.409589	1.15602	0.277778	0.466311	1	5590	tags=52%, list=27%, signal=71%
XU_AKT1_TARGETS_6HR	XU_AKT1_TARGETS_6HR		26	0.458427	1.15592	0.346555	0.466174	1	4430	tags=42%, list=22%, signal=54%
LEIN_NEURON_MARKERS	LEIN_NEURON_MARKERS		69	0.404831	1.15575	0.240084	0.466143	1	2138	tags=23%, list=10%, signal=26%
ANDERSEN_CHOLANGIOCARCINOMA_CLASS2	ANDERSEN_CHOLANGIOCARCINOMA_CLASS2		173	0.411254	1.15563	0.253359	0.46605	1	2543	tags=27%, list=12%, signal=30%
YAGI_AML_WITH_INV_16_TRANSLOCATION	YAGI_AML_WITH_INV_16_TRANSLOCATION		411	0.257888	1.15559	0.241379	0.465823	1	3098	tags=15%, list=15%, signal=18%
NIELSEN_MALIGNAT_FIBROUS_HISTIOCYTOMA_DN	NIELSEN_MALIGNAT_FIBROUS_HISTIOCYTOMA_DN		18	0.416045	1.15514	0.294979	0.46621	1	714	tags=11%, list=3%, signal=12%
BIOCARTA_41BB_PATHWAY	BIOCARTA_41BB_PATHWAY		17	0.431016	1.15503	0.335984	0.466086	1	6109	tags=53%, list=30%, signal=75%
IVANOVA_HEMATOPOIESIS_STEM_CELL_SHORT_TERM	IVANOVA_HEMATOPOIESIS_STEM_CELL_SHORT_TERM		32	0.374611	1.15448	0.232824	0.466702	1	3463	tags=31%, list=17%, signal=38%
FRASOR_TAMOXIFEN_RESPONSE_UP	FRASOR_TAMOXIFEN_RESPONSE_UP		49	0.304903	1.15387	0.273834	0.467323	1	3489	tags=20%, list=17%, signal=25%
REACTOME_CELL_CELL_JUNCTION_ORGANIZATION	REACTOME_CELL_CELL_JUNCTION_ORGANIZATION		56	0.385762	1.15386	0.251004	0.467046	1	3496	tags=23%, list=17%, signal=28%
ALTEMEIER_RESPONSE_TO_LPS_WITH_MECHANICAL_VENTILATION	ALTEMEIER_RESPONSE_TO_LPS_WITH_MECHANICAL_VENTILATION		126	0.484561	1.15242	0.34004	0.469062	1	3430	tags=40%, list=17%, signal=47%
REACTOME_PI3K_AKT_ACTIVATION	REACTOME_PI3K_AKT_ACTIVATION		36	0.294709	1.15173	0.289628	0.469822	1	5153	tags=33%, list=25%, signal=44%
GRAHAM_CML_DIVIDING_VS_NORMAL_QUIESCENT_DN	GRAHAM_CML_DIVIDING_VS_NORMAL_QUIESCENT_DN		90	0.429683	1.1515	0.336756	0.469874	1	5530	tags=52%, list=27%, signal=71%
HOFMANN_CELL_LYMPHOMA_UP	HOFMANN_CELL_LYMPHOMA_UP		50	0.332467	1.15128	0.27381	0.469939	1	3390	tags=26%, list=17%, signal=31%
EBAUER_TARGETS_OF_PAX3_FOXO1_FUSION_UP	EBAUER_TARGETS_OF_PAX3_FOXO1_FUSION_UP		198	0.354356	1.15127	0.253086	0.469674	1	4582	tags=38%, list=22%, signal=49%
GAUSSMANN_MLL_AF4_FUSION_TARGETS_A_DN	GAUSSMANN_MLL_AF4_FUSION_TARGETS_A_DN		86	0.373131	1.15119	0.244489	0.469505	1	3210	tags=29%, list=16%, signal=34%
MORI_SMALL_PRE_BII_LYMPHOCYTE_UP	MORI_SMALL_PRE_BII_LYMPHOCYTE_UP		86	0.314516	1.15067	0.28937	0.470076	1	4221	tags=28%, list=21%, signal=35%
PID_NFKAPPAB_ATYPICAL_PATHWAY	PID_NFKAPPAB_ATYPICAL_PATHWAY		17	0.372068	1.15035	0.316206	0.470282	1	5776	tags=29%, list=28%, signal=41%
TONKS_TARGETS_OF_RUNX1_RUNX1T1_FUSION_HSC_DN	TONKS_TARGETS_OF_RUNX1_RUNX1T1_FUSION_HSC_DN		184	0.403034	1.15034	0.322	0.470008	1	4973	tags=45%, list=24%, signal=59%
KOBAYASHI_RESPONSE_TO_ROMIDEPSIN	KOBAYASHI_RESPONSE_TO_ROMIDEPSIN		18	0.453677	1.15015	0.310204	0.47004	1	3339	tags=28%, list=16%, signal=33%
KEGG_NICOTINATE_AND_NICOTINAMIDE_METABOLISM	KEGG_NICOTINATE_AND_NICOTINAMIDE_METABOLISM		24	0.383131	1.14997	0.250958	0.470013	1	2976	tags=29%, list=15%, signal=34%
HECKER_IFNB1_TARGETS	HECKER_IFNB1_TARGETS		92	0.49676	1.14954	0.322245	0.470437	1	5287	tags=58%, list=26%, signal=77%
LABBE_WNT3A_TARGETS_UP	LABBE_WNT3A_TARGETS_UP		112	0.336763	1.14932	0.260536	0.470487	1	5299	tags=37%, list=26%, signal=49%
KEGG_TIGHT_JUNCTION	KEGG_TIGHT_JUNCTION		132	0.320307	1.14885	0.270661	0.470939	1	4639	tags=30%, list=23%, signal=38%
DACOSTA_ERCC3_ALLELE_XPCS_VS_TTD_UP	DACOSTA_ERCC3_ALLELE_XPCS_VS_TTD_UP		28	0.438135	1.14883	0.288577	0.470678	1	1987	tags=25%, list=10%, signal=28%
ROSS_AML_WITH_AML1_ETO_FUSION	ROSS_AML_WITH_AML1_ETO_FUSION		75	0.336221	1.14829	0.22332	0.471234	1	5104	tags=37%, list=25%, signal=50%
VANTVEER_BREAST_CANCER_ESR1_UP	VANTVEER_BREAST_CANCER_ESR1_UP		160	0.508755	1.14814	0.409465	0.471207	1	5900	tags=57%, list=29%, signal=79%
NIKOLSKY_BREAST_CANCER_12Q13_Q21_AMPLICON	NIKOLSKY_BREAST_CANCER_12Q13_Q21_AMPLICON		44	0.377171	1.1479	0.307229	0.471318	1	4429	tags=32%, list=22%, signal=40%
KEGG_HEMATOPOIETIC_CELL_LINEAGE	KEGG_HEMATOPOIETIC_CELL_LINEAGE		81	0.505181	1.14772	0.359438	0.4713	1	3131	tags=38%, list=15%, signal=45%
BOCHKIS_FOXA2_TARGETS	BOCHKIS_FOXA2_TARGETS		420	0.23885	1.14746	0.215292	0.471387	1	4286	tags=23%, list=21%, signal=28%
WANG_ESOPHAGUS_CANCER_VS_NORMAL_UP	WANG_ESOPHAGUS_CANCER_VS_NORMAL_UP		117	0.349224	1.14744	0.291165	0.471143	1	2729	tags=23%, list=13%, signal=26%
NAKAYAMA_SOFT_TISSUE_TUMORS_PCA2_UP	NAKAYAMA_SOFT_TISSUE_TUMORS_PCA2_UP		87	0.470852	1.14712	0.338983	0.471332	1	1518	tags=23%, list=7%, signal=25%
RICKMAN_HEAD_AND_NECK_CANCER_C	RICKMAN_HEAD_AND_NECK_CANCER_C		101	0.45619	1.14656	0.251004	0.471922	1	2653	tags=33%, list=13%, signal=37%
KUMAR_PATHOGEN_LOAD_BY_MACROPHAGES	KUMAR_PATHOGEN_LOAD_BY_MACROPHAGES		266	0.272745	1.14638	0.192308	0.471913	1	2921	tags=18%, list=14%, signal=20%
DOANE_RESPONSE_TO_ANDROGEN_UP	DOANE_RESPONSE_TO_ANDROGEN_UP		176	0.315863	1.14572	0.268994	0.472646	1	4499	tags=31%, list=22%, signal=39%
PID_P53_DOWNSTREAM_PATHWAY	PID_P53_DOWNSTREAM_PATHWAY		135	0.29059	1.14557	0.267717	0.472576	1	4020	tags=22%, list=20%, signal=27%
REACTOME_ABC_FAMILY_PROTEINS_MEDIATED_TRANSPORT	REACTOME_ABC_FAMILY_PROTEINS_MEDIATED_TRANSPORT		33	0.45568	1.14528	0.300195	0.47278	1	4671	tags=48%, list=23%, signal=63%
BOWIE_RESPONSE_TO_EXTRACELLULAR_MATRIX	BOWIE_RESPONSE_TO_EXTRACELLULAR_MATRIX		17	0.616282	1.14525	0.386831	0.472534	1	5287	tags=59%, list=26%, signal=79%
SIG_INSULIN_RECEPTOR_PATHWAY_IN_CARDIAC_MYOCYTES	SIG_INSULIN_RECEPTOR_PATHWAY_IN_CARDIAC_MYOCYTES		51	0.285153	1.14499	0.30814	0.472646	1	4664	tags=27%, list=23%, signal=35%
TERAMOTO_OPN_TARGETS_CLUSTER_7	TERAMOTO_OPN_TARGETS_CLUSTER_7		18	0.408723	1.14473	0.267925	0.4728	1	934	tags=17%, list=5%, signal=17%
BECKER_TAMOXIFEN_RESISTANCE_UP	BECKER_TAMOXIFEN_RESISTANCE_UP		50	0.392846	1.14459	0.282744	0.472716	1	5276	tags=44%, list=26%, signal=59%
HINATA_NFKB_TARGETS_KERATINOCYTE_DN	HINATA_NFKB_TARGETS_KERATINOCYTE_DN		23	0.463874	1.14411	0.290258	0.473245	1	2533	tags=35%, list=12%, signal=40%
REACTOME_TRIF_MEDIATED_TLR3_SIGNALING	REACTOME_TRIF_MEDIATED_TLR3_SIGNALING		72	0.270791	1.14335	0.309859	0.47413	1	6564	tags=42%, list=32%, signal=61%
PLASARI_TGFB1_SIGNALING_VIA_NFIC_1HR_UP	PLASARI_TGFB1_SIGNALING_VIA_NFIC_1HR_UP		33	0.438098	1.14288	0.310547	0.474615	1	3624	tags=42%, list=18%, signal=51%
BANDRES_RESPONSE_TO_CARMUSTIN_MGMT_48HR_UP	BANDRES_RESPONSE_TO_CARMUSTIN_MGMT_48HR_UP		18	0.415524	1.14245	0.300195	0.475003	1	1554	tags=22%, list=8%, signal=24%
BIOCARTA_TOB1_PATHWAY	BIOCARTA_TOB1_PATHWAY		19	0.555795	1.14222	0.39243	0.475092	1	2451	tags=42%, list=12%, signal=48%
LINDSTEDT_DENDRITIC_CELL_MATURATION_A	LINDSTEDT_DENDRITIC_CELL_MATURATION_A		66	0.497751	1.14217	0.37451	0.474915	1	3986	tags=39%, list=19%, signal=49%
KEGG_UBIQUITIN_MEDIATED_PROTEOLYSIS	KEGG_UBIQUITIN_MEDIATED_PROTEOLYSIS		134	0.183662	1.14135	0.279528	0.47595	1	6533	tags=37%, list=32%, signal=54%
WALLACE_PROSTATE_CANCER_RACE_UP	WALLACE_PROSTATE_CANCER_RACE_UP		273	0.48694	1.14133	0.373469	0.475688	1	4430	tags=46%, list=22%, signal=58%
CHYLA_CBFA2T3_TARGETS_DN	CHYLA_CBFA2T3_TARGETS_DN		232	0.301081	1.14094	0.167677	0.475999	1	5034	tags=35%, list=25%, signal=46%
DAWSON_METHYLATED_IN_LYMPHOMA_TCL1	DAWSON_METHYLATED_IN_LYMPHOMA_TCL1		58	0.446339	1.14048	0.295409	0.476471	1	3139	tags=33%, list=15%, signal=39%
HELLER_HDAC_TARGETS_SILENCED_BY_METHYLATION_UP	HELLER_HDAC_TARGETS_SILENCED_BY_METHYLATION_UP		439	0.304872	1.14019	0.230303	0.476655	1	4299	tags=31%, list=21%, signal=38%
MCBRYAN_PUBERTAL_BREAST_4_5WK_DN	MCBRYAN_PUBERTAL_BREAST_4_5WK_DN		189	0.290036	1.13997	0.302144	0.476713	1	4805	tags=28%, list=23%, signal=36%
RIZ_ERYTHROID_DIFFERENTIATION_HEMGN	RIZ_ERYTHROID_DIFFERENTIATION_HEMGN		30	0.415786	1.13913	0.269841	0.477775	1	3955	tags=33%, list=19%, signal=41%
KEGG_BASAL_CELL_CARCINOMA	KEGG_BASAL_CELL_CARCINOMA		55	0.421674	1.13881	0.294695	0.477954	1	3527	tags=36%, list=17%, signal=44%
SAKAI_CHRONIC_HEPATITIS_VS_LIVER_CANCER_DN	SAKAI_CHRONIC_HEPATITIS_VS_LIVER_CANCER_DN		34	0.389679	1.13822	0.252016	0.478588	1	2904	tags=29%, list=14%, signal=34%
ROME_INSULIN_TARGETS_IN_MUSCLE_UP	ROME_INSULIN_TARGETS_IN_MUSCLE_UP		431	0.168428	1.13802	0.287698	0.478617	1	6227	tags=27%, list=30%, signal=38%
REACTOME_METABOLISM_OF_LIPIDS_AND_LIPOPROTEINS	REACTOME_METABOLISM_OF_LIPIDS_AND_LIPOPROTEINS		464	0.252512	1.13785	0.205426	0.478603	1	4784	tags=25%, list=23%, signal=32%
TANAKA_METHYLATED_IN_ESOPHAGEAL_CARCINOMA	TANAKA_METHYLATED_IN_ESOPHAGEAL_CARCINOMA		100	0.341894	1.13776	0.218623	0.478443	1	3138	tags=22%, list=15%, signal=26%
MARTORIATI_MDM4_TARGETS_NEUROEPITHELIUM_DN	MARTORIATI_MDM4_TARGETS_NEUROEPITHELIUM_DN		159	0.385812	1.13716	0.27572	0.479099	1	4141	tags=37%, list=20%, signal=46%
REACTOME_METAL_ION_SLC_TRANSPORTERS	REACTOME_METAL_ION_SLC_TRANSPORTERS		22	0.40724	1.13705	0.297244	0.478992	1	4710	tags=50%, list=23%, signal=65%
YANG_BREAST_CANCER_ESR1_LASER_UP	YANG_BREAST_CANCER_ESR1_LASER_UP		31	0.504048	1.13668	0.410309	0.479293	1	3958	tags=32%, list=19%, signal=40%
PID_PDGFRA_PATHWAY	PID_PDGFRA_PATHWAY		22	0.365619	1.1364	0.337423	0.479494	1	5475	tags=32%, list=27%, signal=43%
HELLER_HDAC_TARGETS_DN	HELLER_HDAC_TARGETS_DN		284	0.323594	1.13558	0.317025	0.48048	1	3874	tags=25%, list=19%, signal=30%
REACTOME_PI3K_CASCADE	REACTOME_PI3K_CASCADE		68	0.326257	1.135	0.273267	0.481102	1	4852	tags=32%, list=24%, signal=42%
ROVERSI_GLIOMA_LOH_REGIONS	ROVERSI_GLIOMA_LOH_REGIONS		44	0.389037	1.13483	0.284872	0.481123	1	5830	tags=48%, list=28%, signal=67%
SANSOM_APC_TARGETS	SANSOM_APC_TARGETS		203	0.26975	1.13476	0.236893	0.48094	1	2955	tags=19%, list=14%, signal=22%
FONTAINE_PAPILLARY_THYROID_CARCINOMA_DN	FONTAINE_PAPILLARY_THYROID_CARCINOMA_DN		74	0.368665	1.13456	0.262745	0.48095	1	5074	tags=39%, list=25%, signal=52%
SUZUKI_RESPONSE_TO_TSA_AND_DECITABINE_1A	SUZUKI_RESPONSE_TO_TSA_AND_DECITABINE_1A		22	0.458146	1.1345	0.296443	0.480776	1	1162	tags=27%, list=6%, signal=29%
HELLER_SILENCED_BY_METHYLATION_UP	HELLER_SILENCED_BY_METHYLATION_UP		265	0.381932	1.13408	0.317121	0.481207	1	4609	tags=40%, list=22%, signal=50%
POMEROY_MEDULLOBLASTOMA_DESMOPLASIC_VS_CLASSIC_DN	POMEROY_MEDULLOBLASTOMA_DESMOPLASIC_VS_CLASSIC_DN		59	0.365915	1.13393	0.302	0.481181	1	2148	tags=24%, list=10%, signal=26%
LEIN_LOCALIZED_TO_PROXIMAL_DENDRITES	LEIN_LOCALIZED_TO_PROXIMAL_DENDRITES		36	0.407408	1.13375	0.256917	0.481203	1	2126	tags=22%, list=10%, signal=25%
TARTE_PLASMA_CELL_VS_PLASMABLAST_UP	TARTE_PLASMA_CELL_VS_PLASMABLAST_UP		382	0.33418	1.13367	0.254	0.481053	1	4330	tags=31%, list=21%, signal=38%
STEIN_ESR1_TARGETS	STEIN_ESR1_TARGETS		85	0.341174	1.13271	0.289883	0.482257	1	5386	tags=34%, list=26%, signal=46%
HUMMEL_BURKITTS_LYMPHOMA_UP	HUMMEL_BURKITTS_LYMPHOMA_UP		43	0.379467	1.13235	0.31893	0.482572	1	3697	tags=33%, list=18%, signal=40%
HU_ANGIOGENESIS_UP	HU_ANGIOGENESIS_UP		20	0.438063	1.13189	0.319361	0.483054	1	1686	tags=15%, list=8%, signal=16%
PURBEY_TARGETS_OF_CTBP1_AND_SATB1_DN	PURBEY_TARGETS_OF_CTBP1_AND_SATB1_DN		175	0.241991	1.13181	0.225296	0.48288	1	4084	tags=21%, list=20%, signal=25%
HU_GENOTOXIN_ACTION_DIRECT_VS_INDIRECT_24HR	HU_GENOTOXIN_ACTION_DIRECT_VS_INDIRECT_24HR		53	0.23985	1.13138	0.303675	0.483233	1	3777	tags=19%, list=18%, signal=23%
BECKER_TAMOXIFEN_RESISTANCE_DN	BECKER_TAMOXIFEN_RESISTANCE_DN		50	0.370375	1.13115	0.279441	0.483278	1	3490	tags=32%, list=17%, signal=38%
HASLINGER_B_CLL_WITH_13Q14_DELETION	HASLINGER_B_CLL_WITH_13Q14_DELETION		23	0.375208	1.1307	0.295499	0.483727	1	3775	tags=39%, list=18%, signal=48%
FINAK_BREAST_CANCER_SDPP_SIGNATURE	FINAK_BREAST_CANCER_SDPP_SIGNATURE		24	0.534078	1.1305	0.323944	0.483788	1	2414	tags=38%, list=12%, signal=42%
PID_ATF2_PATHWAY	PID_ATF2_PATHWAY		59	0.349969	1.13021	0.288032	0.483955	1	3450	tags=25%, list=17%, signal=30%
BIOCARTA_IL7_PATHWAY	BIOCARTA_IL7_PATHWAY		17	0.540127	1.1299	0.398357	0.484172	1	5335	tags=41%, list=26%, signal=56%
ICHIBA_GRAFT_VERSUS_HOST_DISEASE_35D_UP	ICHIBA_GRAFT_VERSUS_HOST_DISEASE_35D_UP		125	0.422769	1.1299	0.365422	0.483893	1	5219	tags=46%, list=25%, signal=61%
KEGG_GNRH_SIGNALING_PATHWAY	KEGG_GNRH_SIGNALING_PATHWAY		99	0.312194	1.12924	0.259332	0.484685	1	4725	tags=27%, list=23%, signal=35%
HATADA_METHYLATED_IN_LUNG_CANCER_UP	HATADA_METHYLATED_IN_LUNG_CANCER_UP		383	0.358044	1.12918	0.27668	0.484496	1	2767	tags=25%, list=13%, signal=28%
MASSARWEH_RESPONSE_TO_ESTRADIOL	MASSARWEH_RESPONSE_TO_ESTRADIOL		59	0.419043	1.12907	0.338057	0.484423	1	3113	tags=31%, list=15%, signal=36%
GRAHAM_CML_QUIESCENT_VS_NORMAL_DIVIDING_UP	GRAHAM_CML_QUIESCENT_VS_NORMAL_DIVIDING_UP		56	0.437917	1.12903	0.297787	0.484203	1	4085	tags=32%, list=20%, signal=40%
RHEIN_ALL_GLUCOCORTICOID_THERAPY_UP	RHEIN_ALL_GLUCOCORTICOID_THERAPY_UP		75	0.413432	1.12879	0.359596	0.484299	1	4420	tags=39%, list=22%, signal=49%
REACTOME_INSULIN_SYNTHESIS_AND_PROCESSING	REACTOME_INSULIN_SYNTHESIS_AND_PROCESSING		20	0.399833	1.12765	0.34879	0.485863	1	7625	tags=75%, list=37%, signal=119%
MCBRYAN_PUBERTAL_BREAST_3_4WK_UP	MCBRYAN_PUBERTAL_BREAST_3_4WK_UP		213	0.317876	1.12651	0.267465	0.487418	1	3153	tags=25%, list=15%, signal=30%
WILENSKY_RESPONSE_TO_DARAPLADIB	WILENSKY_RESPONSE_TO_DARAPLADIB		28	0.572557	1.12552	0.409639	0.488715	1	3118	tags=43%, list=15%, signal=50%
ROSS_AML_WITH_PML_RARA_FUSION	ROSS_AML_WITH_PML_RARA_FUSION		74	0.354129	1.12547	0.310139	0.488491	1	4043	tags=28%, list=20%, signal=35%
WESTON_VEGFA_TARGETS_3HR	WESTON_VEGFA_TARGETS_3HR		74	0.369384	1.12487	0.290514	0.489142	1	3638	tags=32%, list=18%, signal=39%
REACTOME_ANTIVIRAL_MECHANISM_BY_IFN_STIMULATED_GENES	REACTOME_ANTIVIRAL_MECHANISM_BY_IFN_STIMULATED_GENES		65	0.290336	1.12453	0.364562	0.489421	1	8241	tags=54%, list=40%, signal=90%
REACTOME_G_ALPHA1213_SIGNALLING_EVENTS	REACTOME_G_ALPHA1213_SIGNALLING_EVENTS		73	0.303625	1.12413	0.292636	0.489794	1	4674	tags=32%, list=23%, signal=41%
IIZUKA_LIVER_CANCER_PROGRESSION_G2_G3_UP	IIZUKA_LIVER_CANCER_PROGRESSION_G2_G3_UP		28	0.354409	1.12396	0.324324	0.489775	1	3653	tags=29%, list=18%, signal=35%
DUNNE_TARGETS_OF_AML1_MTG8_FUSION_UP	DUNNE_TARGETS_OF_AML1_MTG8_FUSION_UP		50	0.452644	1.12344	0.366733	0.490304	1	4840	tags=46%, list=24%, signal=60%
PEDRIOLI_MIR31_TARGETS_UP	PEDRIOLI_MIR31_TARGETS_UP		207	0.339052	1.12296	0.24558	0.490802	1	2462	tags=19%, list=12%, signal=22%
BARRIER_CANCER_RELAPSE_NORMAL_SAMPLE_UP	BARRIER_CANCER_RELAPSE_NORMAL_SAMPLE_UP		31	0.415488	1.12292	0.327236	0.490582	1	3431	tags=29%, list=17%, signal=35%
DING_LUNG_CANCER_EXPRESSION_BY_COPY_NUMBER	DING_LUNG_CANCER_EXPRESSION_BY_COPY_NUMBER		99	0.251917	1.12276	0.33463	0.490554	1	7388	tags=44%, list=36%, signal=69%
LIM_MAMMARY_LUMINAL_MATURE_DN	LIM_MAMMARY_LUMINAL_MATURE_DN		98	0.462711	1.1227	0.38477	0.490354	1	3967	tags=49%, list=19%, signal=60%
VERNOCHET_ADIPOGENESIS	VERNOCHET_ADIPOGENESIS		19	0.487985	1.12184	0.306163	0.491409	1	4130	tags=47%, list=20%, signal=59%
MIKKELSEN_NPC_HCP_WITH_H3K4ME3_AND_H3K27ME3	MIKKELSEN_NPC_HCP_WITH_H3K4ME3_AND_H3K27ME3		209	0.376494	1.12141	0.244048	0.491779	1	2799	tags=27%, list=14%, signal=31%
KYNG_NORMAL_AGING_UP	KYNG_NORMAL_AGING_UP		17	0.374336	1.12137	0.324111	0.491539	1	2149	tags=18%, list=10%, signal=20%
TSENG_ADIPOGENIC_POTENTIAL_UP	TSENG_ADIPOGENIC_POTENTIAL_UP		30	0.422895	1.12129	0.320641	0.491361	1	2134	tags=23%, list=10%, signal=26%
PURBEY_TARGETS_OF_CTBP1_NOT_SATB1_DN	PURBEY_TARGETS_OF_CTBP1_NOT_SATB1_DN		430	0.265461	1.12084	0.248566	0.491772	1	2524	tags=15%, list=12%, signal=16%
MULLIGHAN_MLL_SIGNATURE_1_UP	MULLIGHAN_MLL_SIGNATURE_1_UP		371	0.275737	1.12062	0.346899	0.491804	1	4705	tags=25%, list=23%, signal=32%
REACTOME_EICOSANOID_LIGAND_BINDING_RECEPTORS	REACTOME_EICOSANOID_LIGAND_BINDING_RECEPTORS		15	0.551335	1.12048	0.353282	0.491745	1	2349	tags=47%, list=11%, signal=53%
SAKAI_CHRONIC_HEPATITIS_VS_LIVER_CANCER_UP	SAKAI_CHRONIC_HEPATITIS_VS_LIVER_CANCER_UP		79	0.24808	1.12006	0.33463	0.492156	1	6965	tags=41%, list=34%, signal=61%
HUMMERICH_BENIGN_SKIN_TUMOR_DN	HUMMERICH_BENIGN_SKIN_TUMOR_DN		18	0.539817	1.11987	0.332008	0.492175	1	4461	tags=50%, list=22%, signal=64%
KEGG_NEUROTROPHIN_SIGNALING_PATHWAY	KEGG_NEUROTROPHIN_SIGNALING_PATHWAY		126	0.260054	1.1197	0.306122	0.492165	1	6116	tags=36%, list=30%, signal=51%
LU_IL4_SIGNALING	LU_IL4_SIGNALING		90	0.402703	1.11934	0.351626	0.492439	1	5924	tags=56%, list=29%, signal=78%
NUTT_GBM_VS_AO_GLIOMA_UP	NUTT_GBM_VS_AO_GLIOMA_UP		45	0.305454	1.11913	0.354251	0.492487	1	5663	tags=36%, list=28%, signal=49%
KORKOLA_TERATOMA	KORKOLA_TERATOMA		39	0.403495	1.11842	0.296296	0.493377	1	3044	tags=28%, list=15%, signal=33%
REACTOME_NRAGE_SIGNALS_DEATH_THROUGH_JNK	REACTOME_NRAGE_SIGNALS_DEATH_THROUGH_JNK		43	0.339333	1.1183	0.311891	0.493292	1	4674	tags=33%, list=23%, signal=42%
ZHU_CMV_24_HR_UP	ZHU_CMV_24_HR_UP		91	0.312296	1.11729	0.334021	0.494608	1	5842	tags=34%, list=28%, signal=47%
HALMOS_CEBPA_TARGETS_UP	HALMOS_CEBPA_TARGETS_UP		51	0.401118	1.11686	0.323017	0.495008	1	3271	tags=31%, list=16%, signal=37%
KEGG_NEUROACTIVE_LIGAND_RECEPTOR_INTERACTION	KEGG_NEUROACTIVE_LIGAND_RECEPTOR_INTERACTION		271	0.389382	1.11627	0.253465	0.495669	1	2868	tags=30%, list=14%, signal=34%
DUAN_PRDM5_TARGETS	DUAN_PRDM5_TARGETS		78	0.336933	1.11485	0.273486	0.497705	1	3119	tags=19%, list=15%, signal=23%
KEGG_GLIOMA	KEGG_GLIOMA		65	0.317473	1.11478	0.320388	0.497536	1	4664	tags=28%, list=23%, signal=36%
CAFFAREL_RESPONSE_TO_THC_8HR_5_UP	CAFFAREL_RESPONSE_TO_THC_8HR_5_UP		16	0.302572	1.11465	0.289683	0.497467	1	6916	tags=50%, list=34%, signal=75%
BREDEMEYER_RAG_SIGNALING_NOT_VIA_ATM_UP	BREDEMEYER_RAG_SIGNALING_NOT_VIA_ATM_UP		59	0.328214	1.11445	0.322	0.497486	1	4190	tags=36%, list=20%, signal=45%
BIOCARTA_BIOPEPTIDES_PATHWAY	BIOCARTA_BIOPEPTIDES_PATHWAY		42	0.318255	1.11346	0.326044	0.498817	1	6109	tags=38%, list=30%, signal=54%
REACTOME_FRS2_MEDIATED_CASCADE	REACTOME_FRS2_MEDIATED_CASCADE		36	0.396522	1.11285	0.280632	0.49954	1	1707	tags=19%, list=8%, signal=21%
REACTOME_AMINE_COMPOUND_SLC_TRANSPORTERS	REACTOME_AMINE_COMPOUND_SLC_TRANSPORTERS		27	0.430339	1.11282	0.30101	0.499301	1	2461	tags=33%, list=12%, signal=38%
RODRIGUES_NTN1_TARGETS_DN	RODRIGUES_NTN1_TARGETS_DN		156	0.285639	1.11279	0.273256	0.499062	1	4037	tags=27%, list=20%, signal=33%
MEISSNER_NPC_HCP_WITH_H3K4ME2	MEISSNER_NPC_HCP_WITH_H3K4ME2		474	0.349258	1.11261	0.279528	0.499048	1	3206	tags=27%, list=16%, signal=31%
MIKKELSEN_IPS_WITH_HCP_H3K27ME3	MIKKELSEN_IPS_WITH_HCP_H3K27ME3		102	0.414699	1.1124	0.282306	0.499108	1	3803	tags=40%, list=19%, signal=49%
MARSON_FOXP3_TARGETS_STIMULATED_UP	MARSON_FOXP3_TARGETS_STIMULATED_UP		28	0.525928	1.11156	0.413043	0.500163	1	5202	tags=50%, list=25%, signal=67%
YIH_RESPONSE_TO_ARSENITE_C2	YIH_RESPONSE_TO_ARSENITE_C2		18	0.368616	1.1109	0.343137	0.500921	1	5368	tags=39%, list=26%, signal=53%
ZHAN_MULTIPLE_MYELOMA_CD1_VS_CD2_DN	ZHAN_MULTIPLE_MYELOMA_CD1_VS_CD2_DN		52	0.373523	1.11052	0.352941	0.501211	1	4806	tags=37%, list=23%, signal=48%
GAZDA_DIAMOND_BLACKFAN_ANEMIA_PROGENITOR_DN	GAZDA_DIAMOND_BLACKFAN_ANEMIA_PROGENITOR_DN		65	0.238672	1.11049	0.322266	0.500978	1	3215	tags=12%, list=16%, signal=15%
WALLACE_PROSTATE_CANCER_RACE_DN	WALLACE_PROSTATE_CANCER_RACE_DN		81	0.28328	1.11032	0.294845	0.500959	1	3516	tags=23%, list=17%, signal=28%
MARTENS_BOUND_BY_PML_RARA_FUSION	MARTENS_BOUND_BY_PML_RARA_FUSION		444	0.273974	1.11013	0.368	0.500958	1	4569	tags=27%, list=22%, signal=33%
REACTOME_GABA_B_RECEPTOR_ACTIVATION	REACTOME_GABA_B_RECEPTOR_ACTIVATION		38	0.406685	1.1101	0.295858	0.500727	1	1684	tags=26%, list=8%, signal=29%
BOYAULT_LIVER_CANCER_SUBCLASS_G1_DN	BOYAULT_LIVER_CANCER_SUBCLASS_G1_DN		40	0.33378	1.10936	0.34	0.501572	1	4495	tags=35%, list=22%, signal=45%
BURTON_ADIPOGENESIS_PEAK_AT_8HR	BURTON_ADIPOGENESIS_PEAK_AT_8HR		38	0.353024	1.10904	0.357422	0.501785	1	2581	tags=18%, list=13%, signal=21%
MASSARWEH_TAMOXIFEN_RESISTANCE_DN	MASSARWEH_TAMOXIFEN_RESISTANCE_DN		242	0.35689	1.10877	0.344758	0.501937	1	4748	tags=37%, list=23%, signal=47%
REACTOME_GLYCOGEN_BREAKDOWN_GLYCOGENOLYSIS	REACTOME_GLYCOGEN_BREAKDOWN_GLYCOGENOLYSIS		16	0.387214	1.10771	0.360947	0.503418	1	5674	tags=38%, list=28%, signal=52%
KEEN_RESPONSE_TO_ROSIGLITAZONE_DN	KEEN_RESPONSE_TO_ROSIGLITAZONE_DN		104	0.345466	1.10768	0.342159	0.503172	1	4682	tags=31%, list=23%, signal=40%
LIU_TARGETS_OF_VMYB_VS_CMYB_DN	LIU_TARGETS_OF_VMYB_VS_CMYB_DN		41	0.410173	1.10758	0.346	0.50304	1	2592	tags=29%, list=13%, signal=33%
LEE_CALORIE_RESTRICTION_NEOCORTEX_UP	LEE_CALORIE_RESTRICTION_NEOCORTEX_UP		81	0.308365	1.10754	0.28932	0.502816	1	1952	tags=15%, list=10%, signal=16%
GAUSSMANN_MLL_AF4_FUSION_TARGETS_G_UP	GAUSSMANN_MLL_AF4_FUSION_TARGETS_G_UP		224	0.321976	1.10711	0.280318	0.503207	1	3880	tags=30%, list=19%, signal=37%
PIEPOLI_LGI1_TARGETS_UP	PIEPOLI_LGI1_TARGETS_UP		15	0.484627	1.10679	0.334021	0.503377	1	1797	tags=27%, list=9%, signal=29%
ZHU_CMV_ALL_UP	ZHU_CMV_ALL_UP		118	0.327498	1.10669	0.340726	0.50327	1	6013	tags=36%, list=29%, signal=51%
MIKKELSEN_ES_HCP_WITH_H3_UNMETHYLATED	MIKKELSEN_ES_HCP_WITH_H3_UNMETHYLATED		60	0.38912	1.10491	0.283433	0.505859	1	2988	tags=27%, list=15%, signal=31%
COLINA_TARGETS_OF_4EBP1_AND_4EBP2	COLINA_TARGETS_OF_4EBP1_AND_4EBP2		353	0.288894	1.10491	0.312621	0.505576	1	3275	tags=20%, list=16%, signal=23%
CHARAFE_BREAST_CANCER_LUMINAL_VS_BASAL_UP	CHARAFE_BREAST_CANCER_LUMINAL_VS_BASAL_UP		361	0.368318	1.1049	0.393214	0.505296	1	6007	tags=40%, list=29%, signal=56%
CHANGOLKAR_H2AFY_TARGETS_DN	CHANGOLKAR_H2AFY_TARGETS_DN		40	0.3458	1.10466	0.330078	0.505419	1	5181	tags=40%, list=25%, signal=53%
REACTOME_INSULIN_RECEPTOR_SIGNALLING_CASCADE	REACTOME_INSULIN_RECEPTOR_SIGNALLING_CASCADE		84	0.290907	1.10437	0.304	0.505552	1	6604	tags=43%, list=32%, signal=63%
ZHONG_SECRETOME_OF_LUNG_CANCER_AND_ENDOTHELIUM	ZHONG_SECRETOME_OF_LUNG_CANCER_AND_ENDOTHELIUM		65	0.280544	1.10433	0.363265	0.505337	1	3070	tags=18%, list=15%, signal=22%
GRADE_COLON_AND_RECTAL_CANCER_DN	GRADE_COLON_AND_RECTAL_CANCER_DN		97	0.337024	1.10423	0.289738	0.505216	1	4457	tags=38%, list=22%, signal=49%
REACTOME_PEROXISOMAL_LIPID_METABOLISM	REACTOME_PEROXISOMAL_LIPID_METABOLISM		20	0.400036	1.10397	0.366803	0.505355	1	4338	tags=35%, list=21%, signal=44%
ACEVEDO_FGFR1_TARGETS_IN_PROSTATE_CANCER_MODEL_UP	ACEVEDO_FGFR1_TARGETS_IN_PROSTATE_CANCER_MODEL_UP		284	0.331521	1.1039	0.293204	0.505189	1	2571	tags=21%, list=13%, signal=24%
CROONQUIST_NRAS_SIGNALING_UP	CROONQUIST_NRAS_SIGNALING_UP		40	0.461868	1.10376	0.403651	0.505104	1	5108	tags=50%, list=25%, signal=66%
MCBRYAN_PUBERTAL_TGFB1_TARGETS_DN	MCBRYAN_PUBERTAL_TGFB1_TARGETS_DN		62	0.365253	1.10259	0.337278	0.506683	1	2387	tags=23%, list=12%, signal=25%
WARTERS_IR_RESPONSE_5GY	WARTERS_IR_RESPONSE_5GY		45	0.369373	1.10185	0.344196	0.507597	1	4269	tags=31%, list=21%, signal=39%
NABA_ECM_AFFILIATED	NABA_ECM_AFFILIATED		160	0.372056	1.1007	0.292157	0.509204	1	3916	tags=33%, list=19%, signal=40%
LEI_MYB_TARGETS	LEI_MYB_TARGETS		315	0.268722	1.10014	0.333333	0.509766	1	4289	tags=23%, list=21%, signal=29%
PID_PI3KCI_PATHWAY	PID_PI3KCI_PATHWAY		49	0.40019	1.09984	0.43295	0.509948	1	5802	tags=39%, list=28%, signal=54%
GENTILE_UV_RESPONSE_CLUSTER_D7	GENTILE_UV_RESPONSE_CLUSTER_D7		39	0.258917	1.09944	0.310139	0.510298	1	5967	tags=46%, list=29%, signal=65%
BOYAULT_LIVER_CANCER_SUBCLASS_G1_UP	BOYAULT_LIVER_CANCER_SUBCLASS_G1_UP		109	0.21898	1.09929	0.315476	0.510241	1	5060	tags=23%, list=25%, signal=30%
REACTOME_BRANCHED_CHAIN_AMINO_ACID_CATABOLISM	REACTOME_BRANCHED_CHAIN_AMINO_ACID_CATABOLISM		17	0.375063	1.09888	0.371245	0.510631	1	4922	tags=29%, list=24%, signal=39%
KIM_ALL_DISORDERS_OLIGODENDROCYTE_NUMBER_CORR_DN	KIM_ALL_DISORDERS_OLIGODENDROCYTE_NUMBER_CORR_DN		33	0.379261	1.09855	0.285421	0.510844	1	2795	tags=21%, list=14%, signal=25%
GU_PDEF_TARGETS_DN	GU_PDEF_TARGETS_DN		37	0.414194	1.09852	0.384458	0.510618	1	4859	tags=43%, list=24%, signal=57%
RIZKI_TUMOR_INVASIVENESS_3D_UP	RIZKI_TUMOR_INVASIVENESS_3D_UP		207	0.284808	1.09852	0.301205	0.510337	1	3587	tags=22%, list=17%, signal=26%
BROWNE_HCMV_INFECTION_1HR_DN	BROWNE_HCMV_INFECTION_1HR_DN		216	0.261206	1.09851	0.267057	0.510052	1	5410	tags=32%, list=26%, signal=44%
REACTOME_PIP3_ACTIVATES_AKT_SIGNALING	REACTOME_PIP3_ACTIVATES_AKT_SIGNALING		27	0.267633	1.09843	0.32613	0.509891	1	4954	tags=26%, list=24%, signal=34%
LOPEZ_MESOTHELIOMA_SURVIVAL_OVERALL_DN	LOPEZ_MESOTHELIOMA_SURVIVAL_OVERALL_DN		15	0.427393	1.09801	0.334008	0.510277	1	4969	tags=47%, list=24%, signal=62%
JOHANSSON_GLIOMAGENESIS_BY_PDGFB_UP	JOHANSSON_GLIOMAGENESIS_BY_PDGFB_UP		55	0.316257	1.09768	0.378277	0.510537	1	3364	tags=22%, list=16%, signal=26%
FURUKAWA_DUSP6_TARGETS_PCI35_UP	FURUKAWA_DUSP6_TARGETS_PCI35_UP		72	0.367815	1.09735	0.335366	0.510756	1	3918	tags=36%, list=19%, signal=44%
GAVIN_FOXP3_TARGETS_CLUSTER_P4	GAVIN_FOXP3_TARGETS_CLUSTER_P4		99	0.381434	1.09732	0.351515	0.510503	1	3622	tags=30%, list=18%, signal=37%
KEGG_ASTHMA	KEGG_ASTHMA		16	0.516144	1.09731	0.379098	0.510243	1	1211	tags=19%, list=6%, signal=20%
NIELSEN_LEIOMYOSARCOMA_CNN1_UP	NIELSEN_LEIOMYOSARCOMA_CNN1_UP		19	0.472814	1.09728	0.380952	0.509994	1	3121	tags=47%, list=15%, signal=56%
SIG_IL4RECEPTOR_IN_B_LYPHOCYTES	SIG_IL4RECEPTOR_IN_B_LYPHOCYTES		27	0.33661	1.09698	0.361277	0.51021	1	6886	tags=41%, list=34%, signal=61%
MATZUK_IMPLANTATION_AND_UTERINE	MATZUK_IMPLANTATION_AND_UTERINE		22	0.42471	1.09693	0.294466	0.510002	1	2440	tags=27%, list=12%, signal=31%
LIU_VMYB_TARGETS_UP	LIU_VMYB_TARGETS_UP		123	0.244443	1.09676	0.32681	0.510008	1	3809	tags=22%, list=19%, signal=27%
GHANDHI_DIRECT_IRRADIATION_UP	GHANDHI_DIRECT_IRRADIATION_UP		104	0.420264	1.09673	0.353183	0.50978	1	3608	tags=35%, list=18%, signal=42%
ZHAN_V1_LATE_DIFFERENTIATION_GENES_UP	ZHAN_V1_LATE_DIFFERENTIATION_GENES_UP		32	0.332669	1.09649	0.366142	0.509881	1	5590	tags=38%, list=27%, signal=51%
HUANG_GATA2_TARGETS_UP	HUANG_GATA2_TARGETS_UP		146	0.336909	1.096	0.363458	0.510414	1	4923	tags=32%, list=24%, signal=42%
REACTOME_TRANSMEMBRANE_TRANSPORT_OF_SMALL_MOLECULES	REACTOME_TRANSMEMBRANE_TRANSPORT_OF_SMALL_MOLECULES		409	0.30558	1.0959	0.258964	0.510294	1	2681	tags=21%, list=13%, signal=23%
STEIN_ESTROGEN_RESPONSE_NOT_VIA_ESRRA	STEIN_ESTROGEN_RESPONSE_NOT_VIA_ESRRA		18	0.483417	1.09529	0.362376	0.510961	1	5596	tags=56%, list=27%, signal=76%
BOSCO_TH1_CYTOTOXIC_MODULE	BOSCO_TH1_CYTOTOXIC_MODULE		112	0.507865	1.0951	0.411067	0.511022	1	2677	tags=32%, list=13%, signal=37%
SWEET_KRAS_TARGETS_DN	SWEET_KRAS_TARGETS_DN		65	0.329748	1.09486	0.297952	0.511131	1	2914	tags=22%, list=14%, signal=25%
XU_GH1_AUTOCRINE_TARGETS_UP	XU_GH1_AUTOCRINE_TARGETS_UP		247	0.286457	1.09482	0.288306	0.510912	1	4386	tags=28%, list=21%, signal=35%
AIYAR_COBRA1_TARGETS_UP	AIYAR_COBRA1_TARGETS_UP		37	0.344514	1.09477	0.346821	0.510703	1	5213	tags=43%, list=25%, signal=58%
REACTOME_PI3K_EVENTS_IN_ERBB2_SIGNALING	REACTOME_PI3K_EVENTS_IN_ERBB2_SIGNALING		42	0.297646	1.09475	0.337121	0.510452	1	5231	tags=36%, list=26%, signal=48%
LIEN_BREAST_CARCINOMA_METAPLASTIC_VS_DUCTAL_DN	LIEN_BREAST_CARCINOMA_METAPLASTIC_VS_DUCTAL_DN		110	0.485938	1.09409	0.402062	0.511202	1	4749	tags=42%, list=23%, signal=54%
NIKOLSKY_BREAST_CANCER_8Q12_Q22_AMPLICON	NIKOLSKY_BREAST_CANCER_8Q12_Q22_AMPLICON		130	0.364074	1.09371	0.332669	0.511508	1	3763	tags=28%, list=18%, signal=35%
REACTOME_IRON_UPTAKE_AND_TRANSPORT	REACTOME_IRON_UPTAKE_AND_TRANSPORT		36	0.32741	1.09363	0.318182	0.511344	1	3117	tags=22%, list=15%, signal=26%
YAMASHITA_LIVER_CANCER_STEM_CELL_UP	YAMASHITA_LIVER_CANCER_STEM_CELL_UP		47	0.320153	1.09344	0.327273	0.511358	1	3412	tags=26%, list=17%, signal=31%
REACTOME_P75_NTR_RECEPTOR_MEDIATED_SIGNALLING	REACTOME_P75_NTR_RECEPTOR_MEDIATED_SIGNALLING		79	0.249875	1.09196	0.354709	0.513431	1	6886	tags=44%, list=34%, signal=66%
SETLUR_PROSTATE_CANCER_TMPRSS2_ERG_FUSION_DN	SETLUR_PROSTATE_CANCER_TMPRSS2_ERG_FUSION_DN		20	0.450813	1.09192	0.354331	0.513205	1	2031	tags=25%, list=10%, signal=28%
KYNG_WERNER_SYNDROM_AND_NORMAL_AGING_DN	KYNG_WERNER_SYNDROM_AND_NORMAL_AGING_DN		218	0.196458	1.09118	0.308	0.514088	1	5674	tags=29%, list=28%, signal=40%
DER_IFN_GAMMA_RESPONSE_UP	DER_IFN_GAMMA_RESPONSE_UP		67	0.35384	1.09115	0.402105	0.513854	1	5560	tags=36%, list=27%, signal=49%
KEGG_VEGF_SIGNALING_PATHWAY	KEGG_VEGF_SIGNALING_PATHWAY		74	0.310827	1.09114	0.323194	0.513581	1	1495	tags=11%, list=7%, signal=12%
LIU_PROSTATE_CANCER_UP	LIU_PROSTATE_CANCER_UP		90	0.301496	1.09114	0.319502	0.513299	1	4278	tags=29%, list=21%, signal=36%
BAE_BRCA1_TARGETS_DN	BAE_BRCA1_TARGETS_DN		32	0.309003	1.0911	0.332	0.513074	1	5710	tags=41%, list=28%, signal=56%
SOTIRIOU_BREAST_CANCER_GRADE_1_VS_3_DN	SOTIRIOU_BREAST_CANCER_GRADE_1_VS_3_DN		49	0.425324	1.09066	0.425051	0.513514	1	4780	tags=39%, list=23%, signal=50%
ZHAN_MULTIPLE_MYELOMA_MS_DN	ZHAN_MULTIPLE_MYELOMA_MS_DN		44	0.310458	1.09065	0.350775	0.513252	1	4165	tags=32%, list=20%, signal=40%
LEONARD_HYPOXIA	LEONARD_HYPOXIA		46	0.340536	1.08896	0.335378	0.515645	1	5158	tags=35%, list=25%, signal=46%
ONDER_CDH1_TARGETS_1_DN	ONDER_CDH1_TARGETS_1_DN		162	0.325694	1.08891	0.333981	0.515444	1	5965	tags=39%, list=29%, signal=54%
DAVICIONI_MOLECULAR_ARMS_VS_ERMS_UP	DAVICIONI_MOLECULAR_ARMS_VS_ERMS_UP		325	0.255332	1.08826	0.313131	0.516201	1	5671	tags=34%, list=28%, signal=46%
PID_ARF_3PATHWAY	PID_ARF_3PATHWAY		19	0.290631	1.08712	0.326733	0.517799	1	14548	tags=100%, list=71%, signal=344%
KEGG_MELANOGENESIS	KEGG_MELANOGENESIS		101	0.351951	1.0871	0.316532	0.517544	1	3412	tags=25%, list=17%, signal=30%
MARZEC_IL2_SIGNALING_DN	MARZEC_IL2_SIGNALING_DN		36	0.394187	1.08652	0.366279	0.5182	1	5303	tags=44%, list=26%, signal=60%
MATZUK_SPERMATOGONIA	MATZUK_SPERMATOGONIA		24	0.41446	1.08606	0.337349	0.518697	1	810	tags=17%, list=4%, signal=17%
REACTOME_MUSCLE_CONTRACTION	REACTOME_MUSCLE_CONTRACTION		46	0.437384	1.08577	0.387164	0.518864	1	3121	tags=37%, list=15%, signal=43%
URS_ADIPOCYTE_DIFFERENTIATION_UP	URS_ADIPOCYTE_DIFFERENTIATION_UP		73	0.383551	1.08557	0.348089	0.518865	1	4130	tags=34%, list=20%, signal=43%
MAGRANGEAS_MULTIPLE_MYELOMA_IGLL_VS_IGLK_DN	MAGRANGEAS_MULTIPLE_MYELOMA_IGLL_VS_IGLK_DN		23	0.335579	1.08534	0.385827	0.518933	1	4808	tags=30%, list=23%, signal=40%
BERTUCCI_INVASIVE_CARCINOMA_DUCTAL_VS_LOBULAR_DN	BERTUCCI_INVASIVE_CARCINOMA_DUCTAL_VS_LOBULAR_DN		45	0.496366	1.08527	0.40519	0.518773	1	2814	tags=40%, list=14%, signal=46%
KEGG_TYPE_I_DIABETES_MELLITUS	KEGG_TYPE_I_DIABETES_MELLITUS		23	0.528164	1.08482	0.41129	0.519227	1	3192	tags=30%, list=16%, signal=36%
ZHANG_TLX_TARGETS_UP	ZHANG_TLX_TARGETS_UP		108	0.322493	1.0844	0.36714	0.519616	1	5250	tags=35%, list=26%, signal=47%
LUI_THYROID_CANCER_CLUSTER_1	LUI_THYROID_CANCER_CLUSTER_1		48	0.289185	1.084	0.352251	0.519929	1	5954	tags=38%, list=29%, signal=53%
CHO_NR4A1_TARGETS	CHO_NR4A1_TARGETS		32	0.36666	1.08361	0.320248	0.520294	1	3237	tags=22%, list=16%, signal=26%
ROVERSI_GLIOMA_COPY_NUMBER_DN	ROVERSI_GLIOMA_COPY_NUMBER_DN		54	0.345832	1.0836	0.349328	0.520022	1	4432	tags=33%, list=22%, signal=42%
CHEN_HOXA5_TARGETS_9HR_UP	CHEN_HOXA5_TARGETS_9HR_UP		215	0.238212	1.08348	0.344358	0.519965	1	7086	tags=37%, list=35%, signal=56%
KOYAMA_SEMA3B_TARGETS_DN	KOYAMA_SEMA3B_TARGETS_DN		391	0.251938	1.08316	0.296223	0.520204	1	3914	tags=24%, list=19%, signal=29%
HUPER_BREAST_BASAL_VS_LUMINAL_UP	HUPER_BREAST_BASAL_VS_LUMINAL_UP		54	0.475396	1.082	0.380117	0.521851	1	1790	tags=26%, list=9%, signal=28%
KEGG_NOD_LIKE_RECEPTOR_SIGNALING_PATHWAY	KEGG_NOD_LIKE_RECEPTOR_SIGNALING_PATHWAY		62	0.412917	1.08197	0.403162	0.521613	1	6118	tags=55%, list=30%, signal=78%
KYNG_WERNER_SYNDROM_DN	KYNG_WERNER_SYNDROM_DN		28	0.309609	1.08102	0.338374	0.522884	1	6989	tags=54%, list=34%, signal=81%
CHIANG_LIVER_CANCER_SUBCLASS_UNANNOTATED_UP	CHIANG_LIVER_CANCER_SUBCLASS_UNANNOTATED_UP		82	0.317981	1.08093	0.311891	0.522736	1	4626	tags=37%, list=23%, signal=47%
SUBTIL_PROGESTIN_TARGETS	SUBTIL_PROGESTIN_TARGETS		35	0.314085	1.08072	0.317814	0.522777	1	4295	tags=29%, list=21%, signal=36%
BREDEMEYER_RAG_SIGNALING_VIA_ATM_NOT_VIA_NFKB_UP	BREDEMEYER_RAG_SIGNALING_VIA_ATM_NOT_VIA_NFKB_UP		49	0.332225	1.08045	0.340292	0.522889	1	3614	tags=29%, list=18%, signal=35%
CROONQUIST_NRAS_VS_STROMAL_STIMULATION_DN	CROONQUIST_NRAS_VS_STROMAL_STIMULATION_DN		99	0.357102	1.08039	0.379962	0.522688	1	1881	tags=17%, list=9%, signal=19%
VANHARANTA_UTERINE_FIBROID_WITH_7Q_DELETION_UP	VANHARANTA_UTERINE_FIBROID_WITH_7Q_DELETION_UP		66	0.210608	1.07865	0.353909	0.525159	1	2148	tags=9%, list=10%, signal=10%
REACTOME_CREB_PHOSPHORYLATION_THROUGH_THE_ACTIVATION_OF_CAMKII	REACTOME_CREB_PHOSPHORYLATION_THROUGH_THE_ACTIVATION_OF_CAMKII		15	0.454893	1.07856	0.373469	0.525031	1	2508	tags=27%, list=12%, signal=30%
GAUSSMANN_MLL_AF4_FUSION_TARGETS_D_UP	GAUSSMANN_MLL_AF4_FUSION_TARGETS_D_UP		38	0.404469	1.07844	0.350622	0.524941	1	3130	tags=29%, list=15%, signal=34%
BIOCARTA_PGC1A_PATHWAY	BIOCARTA_PGC1A_PATHWAY		22	0.375319	1.07819	0.364173	0.525071	1	744	tags=9%, list=4%, signal=9%
EPPERT_CE_HSC_LSC	EPPERT_CE_HSC_LSC		39	0.427593	1.07811	0.390397	0.524907	1	4494	tags=51%, list=22%, signal=66%
FARDIN_HYPOXIA_11	FARDIN_HYPOXIA_11		30	0.339018	1.07778	0.376278	0.525193	1	2278	tags=17%, list=11%, signal=19%
BIOCARTA_ERK_PATHWAY	BIOCARTA_ERK_PATHWAY		28	0.313947	1.0775	0.357576	0.525331	1	2921	tags=18%, list=14%, signal=21%
BROWN_MYELOID_CELL_DEVELOPMENT_DN	BROWN_MYELOID_CELL_DEVELOPMENT_DN		123	0.290601	1.07746	0.349495	0.525115	1	4448	tags=26%, list=22%, signal=33%
KUMAR_TARGETS_OF_MLL_AF9_FUSION	KUMAR_TARGETS_OF_MLL_AF9_FUSION		398	0.319192	1.07743	0.38523	0.524874	1	4360	tags=28%, list=21%, signal=35%
SABATES_COLORECTAL_ADENOMA_DN	SABATES_COLORECTAL_ADENOMA_DN		278	0.420583	1.07715	0.366197	0.525067	1	3216	tags=36%, list=16%, signal=42%
CHIN_BREAST_CANCER_COPY_NUMBER_UP	CHIN_BREAST_CANCER_COPY_NUMBER_UP		26	0.390053	1.07638	0.387476	0.526035	1	4902	tags=38%, list=24%, signal=50%
REACTOME_SIGNALING_BY_ERBB4	REACTOME_SIGNALING_BY_ERBB4		87	0.251969	1.07614	0.347475	0.526157	1	5335	tags=33%, list=26%, signal=45%
KEGG_FC_EPSILON_RI_SIGNALING_PATHWAY	KEGG_FC_EPSILON_RI_SIGNALING_PATHWAY		77	0.342168	1.07568	0.389764	0.526576	1	6109	tags=39%, list=30%, signal=55%
HELLER_SILENCED_BY_METHYLATION_DN	HELLER_SILENCED_BY_METHYLATION_DN		103	0.312487	1.07464	0.346774	0.527985	1	3568	tags=27%, list=17%, signal=33%
CREIGHTON_ENDOCRINE_THERAPY_RESISTANCE_4	CREIGHTON_ENDOCRINE_THERAPY_RESISTANCE_4		296	0.294587	1.07411	0.366667	0.528519	1	4656	tags=29%, list=23%, signal=37%
ST_PHOSPHOINOSITIDE_3_KINASE_PATHWAY	ST_PHOSPHOINOSITIDE_3_KINASE_PATHWAY		37	0.281695	1.07398	0.381226	0.52845	1	4666	tags=32%, list=23%, signal=42%
CHIARETTI_T_ALL_REFRACTORY_TO_THERAPY	CHIARETTI_T_ALL_REFRACTORY_TO_THERAPY		29	0.426972	1.07397	0.398422	0.528182	1	4749	tags=48%, list=23%, signal=63%
PID_HES_HEY_PATHWAY	PID_HES_HEY_PATHWAY		48	0.309875	1.07388	0.35729	0.528051	1	5912	tags=40%, list=29%, signal=55%
VANOEVELEN_MYOGENESIS_SIN3A_TARGETS	VANOEVELEN_MYOGENESIS_SIN3A_TARGETS		212	0.162646	1.07361	0.320939	0.528206	1	5844	tags=27%, list=29%, signal=37%
REACTOME_TCR_SIGNALING	REACTOME_TCR_SIGNALING		44	0.461509	1.07333	0.464627	0.528377	1	4943	tags=41%, list=24%, signal=54%
LI_WILMS_TUMOR	LI_WILMS_TUMOR		27	0.447704	1.07332	0.351852	0.528096	1	566	tags=19%, list=3%, signal=19%
SHETH_LIVER_CANCER_VS_TXNIP_LOSS_PAM5	SHETH_LIVER_CANCER_VS_TXNIP_LOSS_PAM5		89	0.350523	1.07327	0.314815	0.527912	1	2429	tags=22%, list=12%, signal=25%
DELYS_THYROID_CANCER_DN	DELYS_THYROID_CANCER_DN		231	0.402835	1.07111	0.388889	0.531124	1	4176	tags=35%, list=20%, signal=43%
LEE_LIVER_CANCER_E2F1_UP	LEE_LIVER_CANCER_E2F1_UP		61	0.365131	1.0706	0.382643	0.531672	1	3350	tags=25%, list=16%, signal=29%
COLDREN_GEFITINIB_RESISTANCE_DN	COLDREN_GEFITINIB_RESISTANCE_DN		224	0.319205	1.06979	0.337526	0.532735	1	4381	tags=29%, list=21%, signal=36%
GAUSSMANN_MLL_AF4_FUSION_TARGETS_E_DN	GAUSSMANN_MLL_AF4_FUSION_TARGETS_E_DN		21	0.417151	1.06947	0.349112	0.532948	1	4561	tags=43%, list=22%, signal=55%
REACTOME_SIGNALING_BY_SCF_KIT	REACTOME_SIGNALING_BY_SCF_KIT		75	0.265579	1.06945	0.384314	0.532692	1	4954	tags=27%, list=24%, signal=35%
CHIANG_LIVER_CANCER_SUBCLASS_INTERFERON_DN	CHIANG_LIVER_CANCER_SUBCLASS_INTERFERON_DN		51	0.358624	1.06894	0.342916	0.533244	1	4249	tags=37%, list=21%, signal=47%
REACTOME_NOD1_2_SIGNALING_PATHWAY	REACTOME_NOD1_2_SIGNALING_PATHWAY		29	0.347146	1.06833	0.40404	0.533959	1	5776	tags=48%, list=28%, signal=67%
REACTOME_G_ALPHA_S_SIGNALLING_EVENTS	REACTOME_G_ALPHA_S_SIGNALLING_EVENTS		120	0.368225	1.06829	0.356455	0.533721	1	2831	tags=27%, list=14%, signal=31%
BIOCARTA_MEF2D_PATHWAY	BIOCARTA_MEF2D_PATHWAY		18	0.378906	1.06798	0.395038	0.533947	1	2885	tags=17%, list=14%, signal=19%
PID_EPHA_FWDPATHWAY	PID_EPHA_FWDPATHWAY		34	0.386202	1.0677	0.385356	0.534107	1	4452	tags=32%, list=22%, signal=41%
REACTOME_DOUBLE_STRAND_BREAK_REPAIR	REACTOME_DOUBLE_STRAND_BREAK_REPAIR		22	0.378749	1.06728	0.408829	0.534441	1	5348	tags=50%, list=26%, signal=68%
NIKOLSKY_BREAST_CANCER_17Q21_Q25_AMPLICON	NIKOLSKY_BREAST_CANCER_17Q21_Q25_AMPLICON		325	0.30716	1.06647	0.337374	0.535464	1	4278	tags=27%, list=21%, signal=33%
TSAI_RESPONSE_TO_IONIZING_RADIATION	TSAI_RESPONSE_TO_IONIZING_RADIATION		149	0.296028	1.06631	0.379447	0.535472	1	6134	tags=38%, list=30%, signal=54%
VANDESLUIS_COMMD1_TARGETS_GROUP_4_DN	VANDESLUIS_COMMD1_TARGETS_GROUP_4_DN		16	0.470138	1.06625	0.353635	0.535293	1	3861	tags=50%, list=19%, signal=62%
MCCABE_BOUND_BY_HOXC6	MCCABE_BOUND_BY_HOXC6		434	0.265005	1.06609	0.318458	0.535283	1	3907	tags=22%, list=19%, signal=26%
MCCABE_HOXC6_TARGETS_CANCER_UP	MCCABE_HOXC6_TARGETS_CANCER_UP		29	0.389464	1.06608	0.367793	0.535006	1	4100	tags=38%, list=20%, signal=47%
REACTOME_GABA_RECEPTOR_ACTIVATION	REACTOME_GABA_RECEPTOR_ACTIVATION		52	0.388556	1.066	0.33996	0.534858	1	1684	tags=23%, list=8%, signal=25%
HUANG_FOXA2_TARGETS_UP	HUANG_FOXA2_TARGETS_UP		45	0.382259	1.06596	0.38189	0.53464	1	5037	tags=47%, list=25%, signal=62%
ZHENG_GLIOBLASTOMA_PLASTICITY_DN	ZHENG_GLIOBLASTOMA_PLASTICITY_DN		58	0.38848	1.06587	0.396	0.534499	1	3231	tags=33%, list=16%, signal=39%
LEE_EARLY_T_LYMPHOCYTE_DN	LEE_EARLY_T_LYMPHOCYTE_DN		51	0.437041	1.06579	0.4375	0.534338	1	5940	tags=53%, list=29%, signal=74%
MELLMAN_TUT1_TARGETS_DN	MELLMAN_TUT1_TARGETS_DN		47	0.29149	1.06527	0.36965	0.534847	1	4860	tags=30%, list=24%, signal=39%
SCHLINGEMANN_SKIN_CARCINOGENESIS_TPA_DN	SCHLINGEMANN_SKIN_CARCINOGENESIS_TPA_DN		28	0.392869	1.06475	0.381238	0.535426	1	1488	tags=21%, list=7%, signal=23%
SHEPARD_BMYB_MORPHOLINO_UP	SHEPARD_BMYB_MORPHOLINO_UP		201	0.214813	1.06474	0.326886	0.535145	1	4528	tags=21%, list=22%, signal=27%
KAN_RESPONSE_TO_ARSENIC_TRIOXIDE	KAN_RESPONSE_TO_ARSENIC_TRIOXIDE		121	0.349309	1.06455	0.375486	0.53518	1	3153	tags=26%, list=15%, signal=31%
BOYAULT_LIVER_CANCER_SUBCLASS_G3_DN	BOYAULT_LIVER_CANCER_SUBCLASS_G3_DN		51	0.369591	1.06439	0.38	0.535125	1	3915	tags=29%, list=19%, signal=36%
UROSEVIC_RESPONSE_TO_IMIQUIMOD	UROSEVIC_RESPONSE_TO_IMIQUIMOD		23	0.551294	1.06416	0.465979	0.535203	1	5427	tags=70%, list=26%, signal=95%
AMIT_EGF_RESPONSE_40_MCF10A	AMIT_EGF_RESPONSE_40_MCF10A		18	0.391553	1.06402	0.397313	0.53518	1	5519	tags=44%, list=27%, signal=61%
MARIADASON_REGULATED_BY_HISTONE_ACETYLATION_UP	MARIADASON_REGULATED_BY_HISTONE_ACETYLATION_UP		79	0.24594	1.06375	0.35743	0.535331	1	6084	tags=41%, list=30%, signal=57%
REACTOME_INHIBITION_OF_VOLTAGE_GATED_CA2_CHANNELS_VIA_GBETA_GAMMA_SUBUNITS	REACTOME_INHIBITION_OF_VOLTAGE_GATED_CA2_CHANNELS_VIA_GBETA_GAMMA_SUBUNITS		25	0.427324	1.06144	0.360784	0.538765	1	1684	tags=32%, list=8%, signal=35%
MORI_MATURE_B_LYMPHOCYTE_UP	MORI_MATURE_B_LYMPHOCYTE_UP		83	0.348133	1.06127	0.446215	0.538755	1	4888	tags=39%, list=24%, signal=50%
PID_CMYB_PATHWAY	PID_CMYB_PATHWAY		84	0.286897	1.06089	0.345631	0.539089	1	4658	tags=32%, list=23%, signal=41%
CHEMELLO_SOLEUS_VS_EDL_MYOFIBERS_UP	CHEMELLO_SOLEUS_VS_EDL_MYOFIBERS_UP		35	0.463879	1.06046	0.395112	0.539468	1	2880	tags=34%, list=14%, signal=40%
SARRIO_EPITHELIAL_MESENCHYMAL_TRANSITION_DN	SARRIO_EPITHELIAL_MESENCHYMAL_TRANSITION_DN		151	0.319665	1.06035	0.397233	0.539335	1	4972	tags=34%, list=24%, signal=44%
RAMPON_ENRICHED_LEARNING_ENVIRONMENT_LATE_UP	RAMPON_ENRICHED_LEARNING_ENVIRONMENT_LATE_UP		22	0.329985	1.06022	0.360784	0.539273	1	5314	tags=36%, list=26%, signal=49%
DAZARD_UV_RESPONSE_CLUSTER_G24	DAZARD_UV_RESPONSE_CLUSTER_G24		27	0.41431	1.06017	0.370809	0.539065	1	2762	tags=30%, list=13%, signal=34%
PID_CASPASE_PATHWAY	PID_CASPASE_PATHWAY		51	0.272256	1.06016	0.390688	0.538794	1	6978	tags=47%, list=34%, signal=71%
AMIT_SERUM_RESPONSE_40_MCF10A	AMIT_SERUM_RESPONSE_40_MCF10A		31	0.428113	1.05999	0.444668	0.538806	1	4396	tags=32%, list=21%, signal=41%
PURBEY_TARGETS_OF_CTBP1_NOT_SATB1_UP	PURBEY_TARGETS_OF_CTBP1_NOT_SATB1_UP		333	0.243753	1.05984	0.323529	0.538769	1	5147	tags=29%, list=25%, signal=38%
WANG_RECURRENT_LIVER_CANCER_UP	WANG_RECURRENT_LIVER_CANCER_UP		20	0.343208	1.05982	0.385593	0.538514	1	5836	tags=50%, list=28%, signal=70%
HOFFMANN_LARGE_TO_SMALL_PRE_BII_LYMPHOCYTE_DN	HOFFMANN_LARGE_TO_SMALL_PRE_BII_LYMPHOCYTE_DN		72	0.306964	1.05944	0.345382	0.538862	1	3269	tags=24%, list=16%, signal=28%
RAMALHO_STEMNESS_UP	RAMALHO_STEMNESS_UP		204	0.175279	1.05917	0.381633	0.539008	1	6617	tags=35%, list=32%, signal=52%
BIOCARTA_TNFR2_PATHWAY	BIOCARTA_TNFR2_PATHWAY		18	0.378593	1.05867	0.43254	0.539572	1	7139	tags=56%, list=35%, signal=85%
LI_PROSTATE_CANCER_EPIGENETIC	LI_PROSTATE_CANCER_EPIGENETIC		30	0.396919	1.05861	0.38171	0.539404	1	3285	tags=30%, list=16%, signal=36%
JAATINEN_HEMATOPOIETIC_STEM_CELL_DN	JAATINEN_HEMATOPOIETIC_STEM_CELL_DN		222	0.437623	1.05828	0.426	0.539648	1	3494	tags=34%, list=17%, signal=41%
MOOTHA_GLYCOGEN_METABOLISM	MOOTHA_GLYCOGEN_METABOLISM		20	0.369418	1.05827	0.417166	0.539377	1	3660	tags=30%, list=18%, signal=36%
REACTOME_ACETYLCHOLINE_BINDING_AND_DOWNSTREAM_EVENTS	REACTOME_ACETYLCHOLINE_BINDING_AND_DOWNSTREAM_EVENTS		15	0.492044	1.05738	0.377778	0.540531	1	801	tags=20%, list=4%, signal=21%
WENG_POR_TARGETS_GLOBAL_DN	WENG_POR_TARGETS_GLOBAL_DN		22	0.355627	1.05638	0.412	0.541849	1	3737	tags=27%, list=18%, signal=33%
TIAN_TNF_SIGNALING_VIA_NFKB	TIAN_TNF_SIGNALING_VIA_NFKB		28	0.472862	1.05594	0.43	0.542271	1	3275	tags=32%, list=16%, signal=38%
REACTOME_APOPTOTIC_CLEAVAGE_OF_CELLULAR_PROTEINS	REACTOME_APOPTOTIC_CLEAVAGE_OF_CELLULAR_PROTEINS		38	0.307353	1.05529	0.395303	0.543058	1	6958	tags=55%, list=34%, signal=83%
LIU_CMYB_TARGETS_UP	LIU_CMYB_TARGETS_UP		161	0.228114	1.05495	0.359223	0.543283	1	4610	tags=25%, list=22%, signal=32%
BRUINS_UVC_RESPONSE_VIA_TP53_GROUP_C	BRUINS_UVC_RESPONSE_VIA_TP53_GROUP_C		91	0.304636	1.05492	0.351129	0.543068	1	3927	tags=25%, list=19%, signal=31%
REACTOME_CELL_DEATH_SIGNALLING_VIA_NRAGE_NRIF_AND_NADE	REACTOME_CELL_DEATH_SIGNALLING_VIA_NRAGE_NRIF_AND_NADE		58	0.268122	1.05442	0.399606	0.543631	1	6886	tags=47%, list=34%, signal=70%
RIZKI_TUMOR_INVASIVENESS_3D_DN	RIZKI_TUMOR_INVASIVENESS_3D_DN		265	0.253401	1.0543	0.366089	0.543593	1	3403	tags=20%, list=17%, signal=23%
GUO_HEX_TARGETS_DN	GUO_HEX_TARGETS_DN		64	0.326237	1.05353	0.387914	0.544585	1	4944	tags=34%, list=24%, signal=45%
REACTOME_COSTIMULATION_BY_THE_CD28_FAMILY	REACTOME_COSTIMULATION_BY_THE_CD28_FAMILY		55	0.423953	1.05269	0.453815	0.545682	1	4664	tags=31%, list=23%, signal=40%
CERVERA_SDHB_TARGETS_1_DN	CERVERA_SDHB_TARGETS_1_DN		37	0.395228	1.05249	0.359596	0.54574	1	639	tags=16%, list=3%, signal=17%
SATO_SILENCED_BY_METHYLATION_IN_PANCREATIC_CANCER_1	SATO_SILENCED_BY_METHYLATION_IN_PANCREATIC_CANCER_1		406	0.32017	1.05247	0.348425	0.54549	1	3639	tags=29%, list=18%, signal=34%
REACTOME_GAP_JUNCTION_ASSEMBLY	REACTOME_GAP_JUNCTION_ASSEMBLY		18	0.476805	1.05215	0.373518	0.545717	1	404	tags=17%, list=2%, signal=17%
PID_SHP2_PATHWAY	PID_SHP2_PATHWAY		57	0.367073	1.05206	0.412475	0.54557	1	4664	tags=37%, list=23%, signal=48%
WU_HBX_TARGETS_2_UP	WU_HBX_TARGETS_2_UP		23	0.341506	1.05169	0.410506	0.545927	1	3744	tags=30%, list=18%, signal=37%
KRIEG_HYPOXIA_VIA_KDM3A	KRIEG_HYPOXIA_VIA_KDM3A		53	0.37586	1.05113	0.406844	0.54653	1	4983	tags=36%, list=24%, signal=47%
REACTOME_ACYL_CHAIN_REMODELLING_OF_PI	REACTOME_ACYL_CHAIN_REMODELLING_OF_PI		15	0.44573	1.05053	0.386792	0.547231	1	3115	tags=27%, list=15%, signal=31%
NIELSEN_LIPOSARCOMA_UP	NIELSEN_LIPOSARCOMA_UP		18	0.465405	1.05048	0.414487	0.547017	1	2742	tags=33%, list=13%, signal=38%
MUELLER_COMMON_TARGETS_OF_AML_FUSIONS_DN	MUELLER_COMMON_TARGETS_OF_AML_FUSIONS_DN		30	0.36848	1.04733	0.372277	0.551826	1	3514	tags=27%, list=17%, signal=32%
REACTOME_INWARDLY_RECTIFYING_K_CHANNELS	REACTOME_INWARDLY_RECTIFYING_K_CHANNELS		31	0.400835	1.04708	0.371486	0.551946	1	1684	tags=29%, list=8%, signal=32%
REACTOME_ADAPTIVE_IMMUNE_SYSTEM	REACTOME_ADAPTIVE_IMMUNE_SYSTEM		494	0.268137	1.0461	0.403442	0.553205	1	5036	tags=27%, list=25%, signal=35%
KANG_FLUOROURACIL_RESISTANCE_DN	KANG_FLUOROURACIL_RESISTANCE_DN		16	0.430971	1.04577	0.420432	0.553456	1	5567	tags=50%, list=27%, signal=69%
OLSSON_E2F3_TARGETS_UP	OLSSON_E2F3_TARGETS_UP		28	0.350143	1.0448	0.39759	0.554781	1	4963	tags=36%, list=24%, signal=47%
REACTOME_PRE_NOTCH_EXPRESSION_AND_PROCESSING	REACTOME_PRE_NOTCH_EXPRESSION_AND_PROCESSING		41	0.249701	1.04434	0.384328	0.555266	1	5524	tags=37%, list=27%, signal=50%
JI_RESPONSE_TO_FSH_UP	JI_RESPONSE_TO_FSH_UP		72	0.284841	1.04363	0.389558	0.556136	1	4085	tags=25%, list=20%, signal=31%
KAMMINGA_SENESCENCE	KAMMINGA_SENESCENCE		40	0.292686	1.04356	0.410714	0.555971	1	920	tags=10%, list=4%, signal=10%
KEGG_BUTANOATE_METABOLISM	KEGG_BUTANOATE_METABOLISM		34	0.348244	1.04298	0.406375	0.556624	1	4418	tags=29%, list=22%, signal=37%
SASSON_RESPONSE_TO_FORSKOLIN_UP	SASSON_RESPONSE_TO_FORSKOLIN_UP		89	0.241554	1.0428	0.384314	0.556676	1	6151	tags=35%, list=30%, signal=50%
KYNG_RESPONSE_TO_H2O2_VIA_ERCC6_UP	KYNG_RESPONSE_TO_H2O2_VIA_ERCC6_UP		38	0.253464	1.04277	0.403543	0.556431	1	3557	tags=16%, list=17%, signal=19%
REACTOME_CLASS_I_MHC_MEDIATED_ANTIGEN_PROCESSING_PRESENTATION	REACTOME_CLASS_I_MHC_MEDIATED_ANTIGEN_PROCESSING_PRESENTATION		229	0.183484	1.04247	0.39596	0.556654	1	5650	tags=27%, list=28%, signal=36%
LUCAS_HNF4A_TARGETS_UP	LUCAS_HNF4A_TARGETS_UP		58	0.278931	1.04206	0.386221	0.557028	1	3346	tags=22%, list=16%, signal=27%
MCBRYAN_PUBERTAL_BREAST_4_5WK_UP	MCBRYAN_PUBERTAL_BREAST_4_5WK_UP		267	0.30575	1.04198	0.392786	0.556856	1	3257	tags=23%, list=16%, signal=27%
OSWALD_HEMATOPOIETIC_STEM_CELL_IN_COLLAGEN_GEL_UP	OSWALD_HEMATOPOIETIC_STEM_CELL_IN_COLLAGEN_GEL_UP		231	0.301643	1.04173	0.38833	0.556943	1	3578	tags=20%, list=17%, signal=24%
ZHAN_MULTIPLE_MYELOMA_LB_UP	ZHAN_MULTIPLE_MYELOMA_LB_UP		41	0.350763	1.04125	0.400826	0.55741	1	4396	tags=37%, list=21%, signal=46%
TRACEY_RESISTANCE_TO_IFNA2_DN	TRACEY_RESISTANCE_TO_IFNA2_DN		31	0.342915	1.04124	0.410156	0.557139	1	1639	tags=13%, list=8%, signal=14%
SWEET_LUNG_CANCER_KRAS_UP	SWEET_LUNG_CANCER_KRAS_UP		476	0.234428	1.04115	0.392233	0.556966	1	5357	tags=28%, list=26%, signal=37%
SHETH_LIVER_CANCER_VS_TXNIP_LOSS_PAM4	SHETH_LIVER_CANCER_VS_TXNIP_LOSS_PAM4		256	0.302224	1.04114	0.384016	0.556691	1	2642	tags=20%, list=13%, signal=22%
REACTOME_TRAF6_MEDIATED_INDUCTION_OF_NFKB_AND_MAP_KINASES_UPON_TLR7_8_OR_9_ACTIVATION	REACTOME_TRAF6_MEDIATED_INDUCTION_OF_NFKB_AND_MAP_KINASES_UPON_TLR7_8_OR_9_ACTIVATION		74	0.250125	1.041	0.406551	0.556666	1	6564	tags=41%, list=32%, signal=59%
KIM_BIPOLAR_DISORDER_OLIGODENDROCYTE_DENSITY_CORR_DN	KIM_BIPOLAR_DISORDER_OLIGODENDROCYTE_DENSITY_CORR_DN		86	0.366269	1.0407	0.38114	0.55684	1	2831	tags=24%, list=14%, signal=28%
HUMMEL_BURKITTS_LYMPHOMA_DN	HUMMEL_BURKITTS_LYMPHOMA_DN		15	0.39846	1.04031	0.443064	0.557172	1	8085	tags=53%, list=39%, signal=88%
NAKAJIMA_EOSINOPHIL	NAKAJIMA_EOSINOPHIL		30	0.442956	1.04014	0.418146	0.557167	1	1790	tags=20%, list=9%, signal=22%
WANG_METHYLATED_IN_BREAST_CANCER	WANG_METHYLATED_IN_BREAST_CANCER		35	0.392909	1.03988	0.442231	0.557338	1	2755	tags=23%, list=13%, signal=26%
HADDAD_B_LYMPHOCYTE_PROGENITOR	HADDAD_B_LYMPHOCYTE_PROGENITOR		281	0.278646	1.0397	0.396794	0.557319	1	4498	tags=28%, list=22%, signal=36%
MIKKELSEN_NPC_LCP_WITH_H3K4ME3	MIKKELSEN_NPC_LCP_WITH_H3K4ME3		56	0.359728	1.03962	0.40159	0.557159	1	5102	tags=41%, list=25%, signal=55%
MIKKELSEN_MCV6_ICP_WITH_H3K4ME3_AND_H3K27ME3	MIKKELSEN_MCV6_ICP_WITH_H3K4ME3_AND_H3K27ME3		34	0.424284	1.03941	0.411043	0.557214	1	3611	tags=44%, list=18%, signal=53%
REACTOME_LATENT_INFECTION_OF_HOMO_SAPIENS_WITH_MYCOBACTERIUM_TUBERCULOSIS	REACTOME_LATENT_INFECTION_OF_HOMO_SAPIENS_WITH_MYCOBACTERIUM_TUBERCULOSIS		31	0.358492	1.03923	0.406015	0.557184	1	1692	tags=19%, list=8%, signal=21%
GALINDO_IMMUNE_RESPONSE_TO_ENTEROTOXIN	GALINDO_IMMUNE_RESPONSE_TO_ENTEROTOXIN		83	0.360838	1.03908	0.428571	0.557128	1	3288	tags=20%, list=16%, signal=24%
CHENG_IMPRINTED_BY_ESTRADIOL	CHENG_IMPRINTED_BY_ESTRADIOL		106	0.29039	1.03907	0.402	0.556856	1	3380	tags=21%, list=16%, signal=25%
TARTE_PLASMA_CELL_VS_B_LYMPHOCYTE_DN	TARTE_PLASMA_CELL_VS_B_LYMPHOCYTE_DN		36	0.417895	1.0385	0.453488	0.557495	1	5548	tags=47%, list=27%, signal=65%
RAY_TUMORIGENESIS_BY_ERBB2_CDC25A_DN	RAY_TUMORIGENESIS_BY_ERBB2_CDC25A_DN		156	0.27888	1.03837	0.372277	0.557453	1	5101	tags=33%, list=25%, signal=43%
FIGUEROA_AML_METHYLATION_CLUSTER_1_UP	FIGUEROA_AML_METHYLATION_CLUSTER_1_UP		118	0.299526	1.03775	0.399202	0.558156	1	4278	tags=27%, list=21%, signal=34%
ONDER_CDH1_TARGETS_2_DN	ONDER_CDH1_TARGETS_2_DN		458	0.33925	1.03661	0.409543	0.559697	1	3520	tags=26%, list=17%, signal=30%
KEGG_INSULIN_SIGNALING_PATHWAY	KEGG_INSULIN_SIGNALING_PATHWAY		137	0.245322	1.03619	0.40202	0.560091	1	6963	tags=43%, list=34%, signal=65%
REACTOME_FATTY_ACID_TRIACYLGLYCEROL_AND_KETONE_BODY_METABOLISM	REACTOME_FATTY_ACID_TRIACYLGLYCEROL_AND_KETONE_BODY_METABOLISM		167	0.227061	1.03605	0.397683	0.560014	1	4130	tags=20%, list=20%, signal=25%
REACTOME_SIGNALING_BY_INSULIN_RECEPTOR	REACTOME_SIGNALING_BY_INSULIN_RECEPTOR		105	0.248887	1.03558	0.384762	0.560492	1	5407	tags=30%, list=26%, signal=41%
MARZEC_IL2_SIGNALING_UP	MARZEC_IL2_SIGNALING_UP		114	0.342111	1.03546	0.425743	0.560408	1	4382	tags=29%, list=21%, signal=37%
HOFMANN_MYELODYSPLASTIC_SYNDROM_RISK_DN	HOFMANN_MYELODYSPLASTIC_SYNDROM_RISK_DN		22	0.415887	1.03542	0.422449	0.560186	1	3043	tags=32%, list=15%, signal=37%
PID_IL4_2PATHWAY	PID_IL4_2PATHWAY		62	0.37102	1.03502	0.413934	0.560539	1	5777	tags=40%, list=28%, signal=56%
LEE_METASTASIS_AND_ALTERNATIVE_SPLICING_DN	LEE_METASTASIS_AND_ALTERNATIVE_SPLICING_DN		45	0.338992	1.035	0.414538	0.560281	1	4774	tags=31%, list=23%, signal=40%
CEBALLOS_TARGETS_OF_TP53_AND_MYC_DN	CEBALLOS_TARGETS_OF_TP53_AND_MYC_DN		38	0.35008	1.03379	0.414201	0.561935	1	3358	tags=26%, list=16%, signal=31%
REACTOME_BOTULINUM_NEUROTOXICITY	REACTOME_BOTULINUM_NEUROTOXICITY		18	0.360167	1.03302	0.419223	0.562951	1	2544	tags=22%, list=12%, signal=25%
ZEMBUTSU_SENSITIVITY_TO_CYCLOPHOSPHAMIDE	ZEMBUTSU_SENSITIVITY_TO_CYCLOPHOSPHAMIDE		18	0.379935	1.03268	0.399232	0.563268	1	3164	tags=39%, list=15%, signal=46%
REACTOME_PLC_BETA_MEDIATED_EVENTS	REACTOME_PLC_BETA_MEDIATED_EVENTS		42	0.355839	1.03262	0.415534	0.563083	1	5030	tags=38%, list=25%, signal=50%
PID_RXR_VDR_PATHWAY	PID_RXR_VDR_PATHWAY		26	0.319063	1.03251	0.386965	0.562957	1	4114	tags=27%, list=20%, signal=34%
FLECHNER_BIOPSY_KIDNEY_TRANSPLANT_REJECTED_VS_OK_UP	FLECHNER_BIOPSY_KIDNEY_TRANSPLANT_REJECTED_VS_OK_UP		85	0.45906	1.03203	0.490982	0.563429	1	5229	tags=47%, list=26%, signal=63%
GALE_APL_WITH_FLT3_MUTATED_UP	GALE_APL_WITH_FLT3_MUTATED_UP		55	0.236326	1.03182	0.44898	0.563507	1	3259	tags=18%, list=16%, signal=22%
BORLAK_LIVER_CANCER_EGF_UP	BORLAK_LIVER_CANCER_EGF_UP		57	0.313662	1.03179	0.383698	0.563277	1	3350	tags=23%, list=16%, signal=27%
ZHU_CMV_8_HR_UP	ZHU_CMV_8_HR_UP		46	0.407715	1.03172	0.436992	0.563126	1	5510	tags=43%, list=27%, signal=59%
ENGELMANN_CANCER_PROGENITORS_DN	ENGELMANN_CANCER_PROGENITORS_DN		68	0.351862	1.03107	0.400411	0.563897	1	3429	tags=29%, list=17%, signal=35%
MATZUK_SPERMATID_DIFFERENTIATION	MATZUK_SPERMATID_DIFFERENTIATION		37	0.326707	1.03012	0.416495	0.56517	1	1599	tags=16%, list=8%, signal=18%
OUYANG_PROSTATE_CANCER_PROGRESSION_UP	OUYANG_PROSTATE_CANCER_PROGRESSION_UP		19	0.348327	1.02941	0.407173	0.566058	1	6920	tags=53%, list=34%, signal=79%
KOHOUTEK_CCNT2_TARGETS	KOHOUTEK_CCNT2_TARGETS		58	0.3271	1.02881	0.384462	0.566736	1	2779	tags=21%, list=14%, signal=24%
VANDESLUIS_COMMD1_TARGETS_GROUP_4_UP	VANDESLUIS_COMMD1_TARGETS_GROUP_4_UP		19	0.407091	1.02878	0.412134	0.566513	1	2177	tags=26%, list=11%, signal=29%
KEGG_VASOPRESSIN_REGULATED_WATER_REABSORPTION	KEGG_VASOPRESSIN_REGULATED_WATER_REABSORPTION		44	0.269012	1.02781	0.416185	0.567752	1	5024	tags=32%, list=25%, signal=42%
KEGG_TYPE_II_DIABETES_MELLITUS	KEGG_TYPE_II_DIABETES_MELLITUS		47	0.340161	1.02742	0.417355	0.568097	1	3551	tags=26%, list=17%, signal=31%
QI_PLASMACYTOMA_UP	QI_PLASMACYTOMA_UP		256	0.377417	1.02579	0.474849	0.570465	1	5590	tags=42%, list=27%, signal=57%
MINGUEZ_LIVER_CANCER_VASCULAR_INVASION_DN	MINGUEZ_LIVER_CANCER_VASCULAR_INVASION_DN		21	0.434634	1.02579	0.440404	0.570177	1	3815	tags=33%, list=19%, signal=41%
YAUCH_HEDGEHOG_SIGNALING_PARACRINE_DN	YAUCH_HEDGEHOG_SIGNALING_PARACRINE_DN		255	0.329815	1.02536	0.403162	0.570615	1	3492	tags=28%, list=17%, signal=33%
REACTOME_NEURONAL_SYSTEM	REACTOME_NEURONAL_SYSTEM		276	0.3332	1.02435	0.401623	0.57198	1	2746	tags=23%, list=13%, signal=26%
BIOCARTA_NKCELLS_PATHWAY	BIOCARTA_NKCELLS_PATHWAY		19	0.470766	1.02423	0.483495	0.571878	1	4664	tags=42%, list=23%, signal=54%
BIOCARTA_DC_PATHWAY	BIOCARTA_DC_PATHWAY		22	0.518705	1.02404	0.470825	0.571891	1	2397	tags=32%, list=12%, signal=36%
YANG_BREAST_CANCER_ESR1_BULK_UP	YANG_BREAST_CANCER_ESR1_BULK_UP		27	0.491691	1.02381	0.490722	0.571983	1	6398	tags=52%, list=31%, signal=75%
PHONG_TNF_TARGETS_UP	PHONG_TNF_TARGETS_UP		62	0.399593	1.0232	0.465021	0.572677	1	3251	tags=23%, list=16%, signal=27%
BIOCARTA_INFLAM_PATHWAY	BIOCARTA_INFLAM_PATHWAY		27	0.477828	1.02296	0.463074	0.572796	1	3153	tags=37%, list=15%, signal=44%
LEE_AGING_CEREBELLUM_DN	LEE_AGING_CEREBELLUM_DN		85	0.307111	1.02263	0.441584	0.573067	1	1825	tags=16%, list=9%, signal=18%
KEGG_PATHOGENIC_ESCHERICHIA_COLI_INFECTION	KEGG_PATHOGENIC_ESCHERICHIA_COLI_INFECTION		53	0.285141	1.02219	0.419103	0.573523	1	5153	tags=30%, list=25%, signal=40%
ROYLANCE_BREAST_CANCER_16Q_COPY_NUMBER_DN	ROYLANCE_BREAST_CANCER_16Q_COPY_NUMBER_DN		23	0.410619	1.02186	0.43787	0.57378	1	3543	tags=39%, list=17%, signal=47%
YORDY_RECIPROCAL_REGULATION_BY_ETS1_AND_SP100_UP	YORDY_RECIPROCAL_REGULATION_BY_ETS1_AND_SP100_UP		25	0.27607	1.02116	0.404	0.574613	1	6145	tags=40%, list=30%, signal=57%
YIH_RESPONSE_TO_ARSENITE_C1	YIH_RESPONSE_TO_ARSENITE_C1		24	0.317687	1.021	0.441909	0.574604	1	3541	tags=25%, list=17%, signal=30%
MIKKELSEN_MEF_ICP_WITH_H3K4ME3_AND_H3K27ME3	MIKKELSEN_MEF_ICP_WITH_H3K4ME3_AND_H3K27ME3		37	0.400343	1.021	0.406375	0.57432	1	2477	tags=27%, list=12%, signal=31%
REACTOME_PROTEOLYTIC_CLEAVAGE_OF_SNARE_COMPLEX_PROTEINS	REACTOME_PROTEOLYTIC_CLEAVAGE_OF_SNARE_COMPLEX_PROTEINS		16	0.350007	1.02079	0.419878	0.574372	1	2544	tags=19%, list=12%, signal=21%
ZEMBUTSU_SENSITIVITY_TO_CISPLATIN	ZEMBUTSU_SENSITIVITY_TO_CISPLATIN		20	0.372997	1.02015	0.417166	0.575128	1	5284	tags=35%, list=26%, signal=47%
PID_RETINOIC_ACID_PATHWAY	PID_RETINOIC_ACID_PATHWAY		30	0.278679	1.01943	0.4375	0.575989	1	6109	tags=40%, list=30%, signal=57%
TAKADA_GASTRIC_CANCER_COPY_NUMBER_DN	TAKADA_GASTRIC_CANCER_COPY_NUMBER_DN		28	0.381562	1.01895	0.439072	0.576481	1	3298	tags=32%, list=16%, signal=38%
ZEMBUTSU_SENSITIVITY_TO_DOXORUBICIN	ZEMBUTSU_SENSITIVITY_TO_DOXORUBICIN		17	0.345169	1.01893	0.41517	0.576218	1	517	tags=12%, list=3%, signal=12%
VANDESLUIS_COMMD1_TARGETS_GROUP_3_DN	VANDESLUIS_COMMD1_TARGETS_GROUP_3_DN		38	0.403366	1.0189	0.450505	0.575978	1	2605	tags=34%, list=13%, signal=39%
GROSS_HYPOXIA_VIA_ELK3_ONLY_UP	GROSS_HYPOXIA_VIA_ELK3_ONLY_UP		33	0.402751	1.01872	0.465863	0.576	1	4548	tags=39%, list=22%, signal=51%
EPPERT_PROGENITOR	EPPERT_PROGENITOR		134	0.262147	1.01821	0.444227	0.576542	1	5470	tags=31%, list=27%, signal=41%
NOJIMA_SFRP2_TARGETS_DN	NOJIMA_SFRP2_TARGETS_DN		24	0.38486	1.01804	0.463265	0.576563	1	4846	tags=38%, list=24%, signal=49%
REACTOME_DOWNREGULATION_OF_SMAD2_3_SMAD4_TRANSCRIPTIONAL_ACTIVITY	REACTOME_DOWNREGULATION_OF_SMAD2_3_SMAD4_TRANSCRIPTIONAL_ACTIVITY		19	0.278356	1.01739	0.402	0.577341	1	7760	tags=47%, list=38%, signal=76%
[truncated: 877 more rows]

## Sheet: gsea_report_for_low.risk_154607
NAME	GS<br> follow link to MSigDB	GS DETAILS	SIZE	ES	NES	NOM p-val	FDR q-val	FWER p-val	RANK AT MAX	LEADING EDGE
REACTOME_METABOLISM_OF_RNA	REACTOME_METABOLISM_OF_RNA	Details ...	253	-0.470315	-2.2001	0.00614754	0.0938964	0.086	6845	tags=58%, list=33%, signal=86%
REACTOME_INFLUENZA_LIFE_CYCLE	REACTOME_INFLUENZA_LIFE_CYCLE	Details ...	136	-0.585098	-2.19016	0.00823045	0.0540744	0.094	6784	tags=74%, list=33%, signal=109%
REACTOME_METABOLISM_OF_MRNA	REACTOME_METABOLISM_OF_MRNA	Details ...	209	-0.48878	-2.17021	0.00831601	0.043364	0.117	6845	tags=61%, list=33%, signal=91%
REACTOME_SRP_DEPENDENT_COTRANSLATIONAL_PROTEIN_TARGETING_TO_MEMBRANE	REACTOME_SRP_DEPENDENT_COTRANSLATIONAL_PROTEIN_TARGETING_TO_MEMBRANE	Details ...	110	-0.652369	-2.15776	0.00204082	0.0366743	0.131	6375	tags=85%, list=31%, signal=123%
REACTOME_NONSENSE_MEDIATED_DECAY_ENHANCED_BY_THE_EXON_JUNCTION_COMPLEX	REACTOME_NONSENSE_MEDIATED_DECAY_ENHANCED_BY_THE_EXON_JUNCTION_COMPLEX	Details ...	105	-0.634432	-2.13726	0.00612245	0.035539	0.145	4895	tags=72%, list=24%, signal=95%
REACTOME_TRANSLATION	REACTOME_TRANSLATION	Details ...	147	-0.579526	-2.13429	0.0103306	0.0307647	0.149	6375	tags=72%, list=31%, signal=104%
REACTOME_INFLUENZA_VIRAL_RNA_TRANSCRIPTION_AND_REPLICATION	REACTOME_INFLUENZA_VIRAL_RNA_TRANSCRIPTION_AND_REPLICATION	Details ...	102	-0.661583	-2.11289	0.00608519	0.0333439	0.172	4895	tags=76%, list=24%, signal=100%
PECE_MAMMARY_STEM_CELL_UP	PECE_MAMMARY_STEM_CELL_UP	Details ...	139	-0.562673	-2.02377	0.00209644	0.0732716	0.365	6147	tags=70%, list=30%, signal=99%
KEGG_RIBOSOME	KEGG_RIBOSOME	Details ...	87	-0.681896	-2.02162	0.0102459	0.0665548	0.367	5837	tags=92%, list=28%, signal=128%
REACTOME_PEPTIDE_CHAIN_ELONGATION	REACTOME_PEPTIDE_CHAIN_ELONGATION	Details ...	86	-0.685654	-2.0083	0.00612245	0.0688212	0.411	4895	tags=85%, list=24%, signal=111%
REACTOME_3_UTR_MEDIATED_TRANSLATIONAL_REGULATION	REACTOME_3_UTR_MEDIATED_TRANSLATIONAL_REGULATION	Details ...	106	-0.621633	-2.00673	0.0165289	0.0635752	0.416	6060	tags=81%, list=30%, signal=115%
MOOTHA_HUMAN_MITODB_6_2002	MOOTHA_HUMAN_MITODB_6_2002	Details ...	424	-0.374913	-1.98398	0.00814664	0.0726703	0.496	6514	tags=47%, list=32%, signal=68%
YAO_TEMPORAL_RESPONSE_TO_PROGESTERONE_CLUSTER_13	YAO_TEMPORAL_RESPONSE_TO_PROGESTERONE_CLUSTER_13	Details ...	171	-0.498932	-1.97079	0.0161943	0.0761868	0.537	6894	tags=61%, list=34%, signal=92%
MOOTHA_VOXPHOS	MOOTHA_VOXPHOS	Details ...	85	-0.589355	-1.93807	0.019802	0.0975236	0.637	5853	tags=67%, list=29%, signal=93%
REACTOME_RESPIRATORY_ELECTRON_TRANSPORT_ATP_SYNTHESIS_BY_CHEMIOSMOTIC_COUPLING_AND_HEAT_PRODUCTION_BY_UNCOUPLING_PROTEINS_	REACTOME_RESPIRATORY_ELECTRON_TRANSPORT_ATP_SYNTHESIS_BY_CHEMIOSMOTIC_COUPLING_AND_HEAT_PRODUCTION_BY_UNCOUPLING_PROTEINS_	Details ...	80	-0.615797	-1.9354	0.0140281	0.0932222	0.643	5853	tags=74%, list=29%, signal=103%
MOOTHA_MITOCHONDRIA	MOOTHA_MITOCHONDRIA	Details ...	438	-0.363177	-1.90965	0.0141129	0.11127	0.705	6767	tags=47%, list=33%, signal=69%
MODY_HIPPOCAMPUS_PRENATAL	MODY_HIPPOCAMPUS_PRENATAL	Details ...	41	-0.534308	-1.90951	0.0041841	0.104854	0.705	6450	tags=63%, list=31%, signal=92%
WONG_MITOCHONDRIA_GENE_MODULE	WONG_MITOCHONDRIA_GENE_MODULE	Details ...	215	-0.449577	-1.90253	0.0294695	0.105616	0.716	6489	tags=56%, list=32%, signal=81%
KEGG_OXIDATIVE_PHOSPHORYLATION	KEGG_OXIDATIVE_PHOSPHORYLATION	Details ...	116	-0.501328	-1.87958	0.0275591	0.124129	0.785	5853	tags=59%, list=29%, signal=83%
HSIAO_HOUSEKEEPING_GENES	HSIAO_HOUSEKEEPING_GENES	Details ...	379	-0.361034	-1.85825	0.0393375	0.144049	0.838	6980	tags=50%, list=34%, signal=74%
CHNG_MULTIPLE_MYELOMA_HYPERPLOID_UP	CHNG_MULTIPLE_MYELOMA_HYPERPLOID_UP	Details ...	52	-0.636956	-1.85316	0.004158	0.143351	0.849	5435	tags=81%, list=27%, signal=110%
KIM_ALL_DISORDERS_DURATION_CORR_DN	KIM_ALL_DISORDERS_DURATION_CORR_DN	Details ...	143	-0.443585	-1.83659	0.0124224	0.158604	0.877	7384	tags=66%, list=36%, signal=102%
REACTOME_TCA_CYCLE_AND_RESPIRATORY_ELECTRON_TRANSPORT	REACTOME_TCA_CYCLE_AND_RESPIRATORY_ELECTRON_TRANSPORT	Details ...	116	-0.450946	-1.83565	0.0384615	0.15317	0.878	6843	tags=65%, list=33%, signal=96%
REACTOME_BASE_EXCISION_REPAIR	REACTOME_BASE_EXCISION_REPAIR	Details ...	19	-0.600155	-1.82304	0.0122449	0.164336	0.899	6155	tags=63%, list=30%, signal=90%
TONG_INTERACT_WITH_PTTG1	TONG_INTERACT_WITH_PTTG1	Details ...	55	-0.441828	-1.82223	0.00209205	0.158849	0.899	5301	tags=45%, list=26%, signal=61%
SPIELMAN_LYMPHOBLAST_EUROPEAN_VS_ASIAN_UP	SPIELMAN_LYMPHOBLAST_EUROPEAN_VS_ASIAN_UP	Details ...	469	-0.383093	-1.82103	0.0168067	0.154455	0.902	6722	tags=51%, list=33%, signal=74%
REACTOME_ACTIVATION_OF_THE_MRNA_UPON_BINDING_OF_THE_CAP_BINDING_COMPLEX_AND_EIFS_AND_SUBSEQUENT_BINDING_TO_43S	REACTOME_ACTIVATION_OF_THE_MRNA_UPON_BINDING_OF_THE_CAP_BINDING_COMPLEX_AND_EIFS_AND_SUBSEQUENT_BINDING_TO_43S	Details ...	57	-0.558358	-1.81919	0.0417537	0.151359	0.905	5317	tags=63%, list=26%, signal=85%
TIEN_INTESTINE_PROBIOTICS_6HR_UP	TIEN_INTESTINE_PROBIOTICS_6HR_UP	Details ...	55	-0.477927	-1.81886	0.0355649	0.146349	0.906	4517	tags=47%, list=22%, signal=60%
BILANGES_SERUM_AND_RAPAMYCIN_SENSITIVE_GENES	BILANGES_SERUM_AND_RAPAMYCIN_SENSITIVE_GENES	Details ...	68	-0.571402	-1.81734	0.0270833	0.143036	0.908	4793	tags=71%, list=23%, signal=92%
KEGG_SPLICEOSOME	KEGG_SPLICEOSOME	Details ...	114	-0.446555	-1.81051	0.03125	0.146262	0.917	6942	tags=52%, list=34%, signal=78%
YAMASHITA_LIVER_CANCER_WITH_EPCAM_UP	YAMASHITA_LIVER_CANCER_WITH_EPCAM_UP	Details ...	53	-0.478757	-1.80456	0.0106838	0.149215	0.924	6743	tags=68%, list=33%, signal=101%
REACTOME_FORMATION_OF_THE_TERNARY_COMPLEX_AND_SUBSEQUENTLY_THE_43S_COMPLEX	REACTOME_FORMATION_OF_THE_TERNARY_COMPLEX_AND_SUBSEQUENTLY_THE_43S_COMPLEX	Details ...	49	-0.590382	-1.78565	0.0298507	0.170221	0.95	6060	tags=78%, list=30%, signal=110%
REACTOME_RESOLUTION_OF_AP_SITES_VIA_THE_MULTIPLE_NUCLEOTIDE_PATCH_REPLACEMENT_PATHWAY	REACTOME_RESOLUTION_OF_AP_SITES_VIA_THE_MULTIPLE_NUCLEOTIDE_PATCH_REPLACEMENT_PATHWAY	Details ...	17	-0.613293	-1.78184	0.0184805	0.17052	0.953	5874	tags=65%, list=29%, signal=91%
WALLACE_JAK2_TARGETS_UP	WALLACE_JAK2_TARGETS_UP	Details ...	25	-0.595814	-1.78174	0.00625	0.165584	0.954	6943	tags=72%, list=34%, signal=109%
YAO_TEMPORAL_RESPONSE_TO_PROGESTERONE_CLUSTER_17	YAO_TEMPORAL_RESPONSE_TO_PROGESTERONE_CLUSTER_17	Details ...	177	-0.410129	-1.77694	0.05074	0.168302	0.959	7471	tags=54%, list=36%, signal=85%
GINESTIER_BREAST_CANCER_ZNF217_AMPLIFIED_DN	GINESTIER_BREAST_CANCER_ZNF217_AMPLIFIED_DN	Details ...	315	-0.40584	-1.76712	0.0401606	0.177417	0.964	7734	tags=57%, list=38%, signal=90%
REACTOME_RESPIRATORY_ELECTRON_TRANSPORT	REACTOME_RESPIRATORY_ELECTRON_TRANSPORT	Details ...	64	-0.612215	-1.75417	0.0371901	0.193611	0.971	5727	tags=72%, list=28%, signal=99%
KEGG_PARKINSONS_DISEASE	KEGG_PARKINSONS_DISEASE	Details ...	113	-0.437919	-1.73954	0.0301811	0.213249	0.982	5853	tags=58%, list=29%, signal=81%
LI_DCP2_BOUND_MRNA	LI_DCP2_BOUND_MRNA	Details ...	89	-0.504859	-1.72409	0.0595483	0.235921	0.986	7456	tags=72%, list=36%, signal=113%
KEGG_BASE_EXCISION_REPAIR	KEGG_BASE_EXCISION_REPAIR	Details ...	33	-0.5056	-1.72285	0.0404858	0.232268	0.986	8142	tags=70%, list=40%, signal=115%
TAKAO_RESPONSE_TO_UVB_RADIATION_UP	TAKAO_RESPONSE_TO_UVB_RADIATION_UP	Details ...	86	-0.416475	-1.71347	0.0257511	0.244504	0.99	6452	tags=55%, list=31%, signal=79%
REACTOME_MITOCHONDRIAL_PROTEIN_IMPORT	REACTOME_MITOCHONDRIAL_PROTEIN_IMPORT	Details ...	49	-0.495417	-1.70866	0.0502008	0.248371	0.99	6783	tags=59%, list=33%, signal=88%
POMEROY_MEDULLOBLASTOMA_PROGNOSIS_DN	POMEROY_MEDULLOBLASTOMA_PROGNOSIS_DN	Details ...	43	-0.493097	-1.7018	0.0329897	0.257192	0.991	4924	tags=58%, list=24%, signal=76%
ZHANG_RESPONSE_TO_CANTHARIDIN_DN	ZHANG_RESPONSE_TO_CANTHARIDIN_DN	Details ...	67	-0.425003	-1.6913	0.0599174	0.274451	0.992	6919	tags=60%, list=34%, signal=90%
REACTOME_MRNA_SPLICING	REACTOME_MRNA_SPLICING	Details ...	97	-0.456631	-1.68278	0.0357143	0.287946	0.995	8025	tags=57%, list=39%, signal=93%
ANDERSEN_LIVER_CANCER_KRT19_UP	ANDERSEN_LIVER_CANCER_KRT19_UP	Details ...	35	-0.508197	-1.67393	0.0410678	0.302466	0.998	4794	tags=54%, list=23%, signal=71%
REACTOME_DESTABILIZATION_OF_MRNA_BY_KSRP	REACTOME_DESTABILIZATION_OF_MRNA_BY_KSRP	Details ...	17	-0.507999	-1.6663	0.0306122	0.313282	0.998	7211	tags=65%, list=35%, signal=100%
REACTOME_AMINO_ACID_SYNTHESIS_AND_INTERCONVERSION_TRANSAMINATION	REACTOME_AMINO_ACID_SYNTHESIS_AND_INTERCONVERSION_TRANSAMINATION	Details ...	16	-0.61585	-1.65708	0.0270833	0.329524	0.998	4454	tags=50%, list=22%, signal=64%
ZHONG_RESPONSE_TO_AZACITIDINE_AND_TSA_DN	ZHONG_RESPONSE_TO_AZACITIDINE_AND_TSA_DN	Details ...	65	-0.369188	-1.64908	0.0283843	0.343107	0.998	6023	tags=40%, list=29%, signal=56%
REACTOME_MRNA_SPLICING_MINOR_PATHWAY	REACTOME_MRNA_SPLICING_MINOR_PATHWAY	Details ...	38	-0.525285	-1.64814	0.0409836	0.338534	0.998	6353	tags=55%, list=31%, signal=80%
KEGG_ONE_CARBON_POOL_BY_FOLATE	KEGG_ONE_CARBON_POOL_BY_FOLATE	Details ...	17	-0.572244	-1.64494	0.0148305	0.340274	0.999	3703	tags=41%, list=18%, signal=50%
HOLLEMAN_PREDNISOLONE_RESISTANCE_ALL_UP	HOLLEMAN_PREDNISOLONE_RESISTANCE_ALL_UP	Details ...	19	-0.520541	-1.63216	0.0310559	0.367509	1	7135	tags=58%, list=35%, signal=89%
KEGG_RNA_POLYMERASE	KEGG_RNA_POLYMERASE	Details ...	29	-0.493693	-1.61785	0.0674847	0.400859	1	5554	tags=45%, list=27%, signal=61%
LUI_TARGETS_OF_PAX8_PPARG_FUSION	LUI_TARGETS_OF_PAX8_PPARG_FUSION	Details ...	32	-0.442721	-1.61547	0.0538302	0.399997	1	5080	tags=41%, list=25%, signal=54%
SCHLOSSER_MYC_TARGETS_AND_SERUM_RESPONSE_UP	SCHLOSSER_MYC_TARGETS_AND_SERUM_RESPONSE_UP	Details ...	46	-0.460189	-1.61451	0.0979592	0.395274	1	7899	tags=65%, list=39%, signal=106%
KEGG_HUNTINGTONS_DISEASE	KEGG_HUNTINGTONS_DISEASE	Details ...	172	-0.331414	-1.61071	0.0260521	0.399293	1	6843	tags=52%, list=33%, signal=77%
HOLLEMAN_VINCRISTINE_RESISTANCE_ALL_DN	HOLLEMAN_VINCRISTINE_RESISTANCE_ALL_DN	Details ...	19	-0.567907	-1.60182	0.0529532	0.417784	1	6060	tags=68%, list=30%, signal=97%
IRITANI_MAD1_TARGETS_DN	IRITANI_MAD1_TARGETS_DN	Details ...	46	-0.457046	-1.58934	0.0679406	0.448333	1	6029	tags=54%, list=29%, signal=77%
DANG_MYC_TARGETS_UP	DANG_MYC_TARGETS_UP	Details ...	138	-0.400415	-1.58871	0.0989899	0.44263	1	6452	tags=54%, list=31%, signal=79%
KUUSELO_PANCREATIC_CANCER_19Q13_AMPLIFICATION	KUUSELO_PANCREATIC_CANCER_19Q13_AMPLIFICATION	Details ...	30	-0.575092	-1.5797	0.0291262	0.463917	1	3895	tags=50%, list=19%, signal=62%
REACTOME_PROCESSING_OF_CAPPED_INTRON_CONTAINING_PRE_MRNA	REACTOME_PROCESSING_OF_CAPPED_INTRON_CONTAINING_PRE_MRNA	Details ...	126	-0.402108	-1.57836	0.0798319	0.460952	1	7549	tags=48%, list=37%, signal=75%
NIKOLSKY_BREAST_CANCER_20Q11_AMPLICON	NIKOLSKY_BREAST_CANCER_20Q11_AMPLICON	Details ...	31	-0.552757	-1.57414	0.0504673	0.46691	1	4555	tags=42%, list=22%, signal=54%
TOMIDA_METASTASIS_UP	TOMIDA_METASTASIS_UP	Details ...	25	-0.526824	-1.56997	0.0301811	0.472977	1	5418	tags=48%, list=26%, signal=65%
HOLLEMAN_ASPARAGINASE_RESISTANCE_B_ALL_UP	HOLLEMAN_ASPARAGINASE_RESISTANCE_B_ALL_UP	Details ...	26	-0.499656	-1.55885	0.0846457	0.501853	1	4793	tags=69%, list=23%, signal=90%
ZAMORA_NOS2_TARGETS_UP	ZAMORA_NOS2_TARGETS_UP	Details ...	67	-0.419774	-1.55192	0.0897959	0.517455	1	6017	tags=49%, list=29%, signal=69%
PID_MYC_PATHWAY	PID_MYC_PATHWAY	Details ...	25	-0.424332	-1.55165	0.0668058	0.51054	1	8582	tags=72%, list=42%, signal=124%
REACTOME_DEADENYLATION_DEPENDENT_MRNA_DECAY	REACTOME_DEADENYLATION_DEPENDENT_MRNA_DECAY	Details ...	44	-0.383039	-1.54614	0.0644491	0.521708	1	7008	tags=45%, list=34%, signal=69%
HOLLEMAN_PREDNISOLONE_RESISTANCE_B_ALL_UP	HOLLEMAN_PREDNISOLONE_RESISTANCE_B_ALL_UP	Details ...	22	-0.482893	-1.53531	0.0668104	0.553542	1	7180	tags=59%, list=35%, signal=91%
ODONNELL_METASTASIS_DN	ODONNELL_METASTASIS_DN	Details ...	23	-0.548297	-1.53486	0.0395257	0.546984	1	4904	tags=57%, list=24%, signal=74%
MUELLER_PLURINET	MUELLER_PLURINET	Details ...	287	-0.396428	-1.53245	0.10998	0.547544	1	6634	tags=53%, list=32%, signal=77%
NAGY_STAGA_COMPONENTS_HUMAN	NAGY_STAGA_COMPONENTS_HUMAN	Details ...	15	-0.443703	-1.52584	0.0533597	0.564087	1	6584	tags=47%, list=32%, signal=69%
REACTOME_ABORTIVE_ELONGATION_OF_HIV1_TRANSCRIPT_IN_THE_ABSENCE_OF_TAT	REACTOME_ABORTIVE_ELONGATION_OF_HIV1_TRANSCRIPT_IN_THE_ABSENCE_OF_TAT	Details ...	23	-0.487045	-1.52541	0.0938776	0.557717	1	8025	tags=61%, list=39%, signal=100%
KAUFFMANN_DNA_REPLICATION_GENES	KAUFFMANN_DNA_REPLICATION_GENES	Details ...	139	-0.401014	-1.5196	0.0993789	0.571223	1	6548	tags=47%, list=32%, signal=68%
KEGG_DNA_REPLICATION	KEGG_DNA_REPLICATION	Details ...	36	-0.570342	-1.51261	0.117021	0.589115	1	6030	tags=61%, list=29%, signal=86%
LUI_THYROID_CANCER_CLUSTER_3	LUI_THYROID_CANCER_CLUSTER_3	Details ...	28	-0.46428	-1.51175	0.083682	0.584513	1	7923	tags=71%, list=39%, signal=116%
HOLLEMAN_VINCRISTINE_RESISTANCE_B_ALL_DN	HOLLEMAN_VINCRISTINE_RESISTANCE_B_ALL_DN	Details ...	15	-0.517701	-1.4995	0.106472	0.62326	1	7758	tags=80%, list=38%, signal=129%
REACTOME_EXTENSION_OF_TELOMERES	REACTOME_EXTENSION_OF_TELOMERES	Details ...	27	-0.581832	-1.49809	0.113169	0.6206	1	5900	tags=63%, list=29%, signal=88%
REACTOME_MRNA_PROCESSING	REACTOME_MRNA_PROCESSING	Details ...	146	-0.326762	-1.49784	0.112245	0.61359	1	7549	tags=45%, list=37%, signal=71%
YAO_TEMPORAL_RESPONSE_TO_PROGESTERONE_CLUSTER_10	YAO_TEMPORAL_RESPONSE_TO_PROGESTERONE_CLUSTER_10	Details ...	67	-0.315712	-1.48998	0.114398	0.635611	1	7004	tags=42%, list=34%, signal=63%
SCHLOSSER_MYC_AND_SERUM_RESPONSE_SYNERGY	SCHLOSSER_MYC_AND_SERUM_RESPONSE_SYNERGY	Details ...	32	-0.457234	-1.48404	0.112971	0.650455	1	6226	tags=56%, list=30%, signal=81%
JISON_SICKLE_CELL_DISEASE_DN	JISON_SICKLE_CELL_DISEASE_DN		168	-0.297788	-1.48109	0.0797546	0.65374	1	6034	tags=43%, list=29%, signal=60%
PID_HIF1A_PATHWAY	PID_HIF1A_PATHWAY		19	-0.445806	-1.47915	0.0763359	0.653437	1	5712	tags=47%, list=28%, signal=66%
PRAMOONJAGO_SOX4_TARGETS_DN	PRAMOONJAGO_SOX4_TARGETS_DN		51	-0.44657	-1.4785	0.102249	0.647962	1	6040	tags=53%, list=29%, signal=75%
REACTOME_G_PROTEIN_ACTIVATION	REACTOME_G_PROTEIN_ACTIVATION		27	-0.54454	-1.47204	0.045929	0.665135	1	1639	tags=33%, list=8%, signal=36%
STARK_HYPPOCAMPUS_22Q11_DELETION_DN	STARK_HYPPOCAMPUS_22Q11_DELETION_DN		19	-0.603254	-1.4615	0.109504	0.698775	1	4887	tags=63%, list=24%, signal=83%
BILANGES_RAPAMYCIN_SENSITIVE_VIA_TSC1_AND_TSC2	BILANGES_RAPAMYCIN_SENSITIVE_VIA_TSC1_AND_TSC2		71	-0.32435	-1.46022	0.129897	0.695822	1	6957	tags=49%, list=34%, signal=74%
KEGG_PROTEIN_EXPORT	KEGG_PROTEIN_EXPORT		23	-0.455413	-1.46005	0.119149	0.68853	1	8069	tags=57%, list=39%, signal=93%
REACTOME_METABOLISM_OF_POLYAMINES	REACTOME_METABOLISM_OF_POLYAMINES		15	-0.506237	-1.45892	0.0909091	0.685362	1	7150	tags=80%, list=35%, signal=123%
KEGG_RNA_DEGRADATION	KEGG_RNA_DEGRADATION		57	-0.328309	-1.4564	0.126294	0.687238	1	7008	tags=40%, list=34%, signal=61%
HEIDENBLAD_AMPLICON_12P11_12_DN	HEIDENBLAD_AMPLICON_12P11_12_DN		27	-0.455696	-1.45528	0.0764463	0.684048	1	4040	tags=33%, list=20%, signal=41%
REACTOME_ACTIVATION_OF_GENES_BY_ATF4	REACTOME_ACTIVATION_OF_GENES_BY_ATF4		24	-0.464043	-1.4532	0.100806	0.684293	1	7211	tags=63%, list=35%, signal=96%
REACTOME_PROCESSIVE_SYNTHESIS_ON_THE_LAGGING_STRAND	REACTOME_PROCESSIVE_SYNTHESIS_ON_THE_LAGGING_STRAND		15	-0.57446	-1.44192	0.137214	0.720905	1	7028	tags=67%, list=34%, signal=101%
CHICAS_RB1_TARGETS_LOW_SERUM	CHICAS_RB1_TARGETS_LOW_SERUM		92	-0.451393	-1.44025	0.0942184	0.720022	1	4851	tags=58%, list=24%, signal=75%
BILANGES_SERUM_RESPONSE_TRANSLATION	BILANGES_SERUM_RESPONSE_TRANSLATION		37	-0.434851	-1.43991	0.0989691	0.713696	1	4568	tags=62%, list=22%, signal=80%
KEGG_GLYOXYLATE_AND_DICARBOXYLATE_METABOLISM	KEGG_GLYOXYLATE_AND_DICARBOXYLATE_METABOLISM		16	-0.491832	-1.43784	0.0958333	0.714148	1	6257	tags=56%, list=31%, signal=81%
MALONEY_RESPONSE_TO_17AAG_DN	MALONEY_RESPONSE_TO_17AAG_DN		74	-0.33757	-1.43485	0.147368	0.718207	1	6614	tags=51%, list=32%, signal=76%
REACTOME_DNA_STRAND_ELONGATION	REACTOME_DNA_STRAND_ELONGATION		30	-0.617818	-1.43412	0.146868	0.713398	1	5900	tags=67%, list=29%, signal=93%
REACTOME_CLEAVAGE_OF_GROWING_TRANSCRIPT_IN_THE_TERMINATION_REGION_	REACTOME_CLEAVAGE_OF_GROWING_TRANSCRIPT_IN_THE_TERMINATION_REGION_		34	-0.433965	-1.43329	0.124473	0.709381	1	7441	tags=53%, list=36%, signal=83%
DAIRKEE_TERT_TARGETS_UP	DAIRKEE_TERT_TARGETS_UP		367	-0.316348	-1.42794	0.118257	0.723555	1	7387	tags=61%, list=36%, signal=94%
REACTOME_LAGGING_STRAND_SYNTHESIS	REACTOME_LAGGING_STRAND_SYNTHESIS		19	-0.577478	-1.42753	0.144068	0.717781	1	5900	tags=63%, list=29%, signal=89%
NIKOLSKY_BREAST_CANCER_22Q13_AMPLICON	NIKOLSKY_BREAST_CANCER_22Q13_AMPLICON		17	-0.637199	-1.41986	0.113131	0.740373	1	6173	tags=82%, list=30%, signal=118%
WONG_EMBRYONIC_STEM_CELL_CORE	WONG_EMBRYONIC_STEM_CELL_CORE		331	-0.416909	-1.40381	0.216387	0.798531	1	6479	tags=52%, list=32%, signal=75%
REACTOME_PERK_REGULATED_GENE_EXPRESSION	REACTOME_PERK_REGULATED_GENE_EXPRESSION		27	-0.417273	-1.40358	0.136273	0.791714	1	7211	tags=56%, list=35%, signal=86%
ZHAN_MULTIPLE_MYELOMA_SUBGROUPS	ZHAN_MULTIPLE_MYELOMA_SUBGROUPS		30	-0.489494	-1.40157	0.169734	0.792611	1	7820	tags=67%, list=38%, signal=108%
RICKMAN_TUMOR_DIFFERENTIATED_WELL_VS_POORLY_UP	RICKMAN_TUMOR_DIFFERENTIATED_WELL_VS_POORLY_UP		224	-0.310393	-1.3914	0.106339	0.827218	1	6947	tags=42%, list=34%, signal=63%
NAGY_TFTC_COMPONENTS_HUMAN	NAGY_TFTC_COMPONENTS_HUMAN		19	-0.385444	-1.38955	0.124752	0.82721	1	6584	tags=47%, list=32%, signal=70%
JAZAG_TGFB1_SIGNALING_DN	JAZAG_TGFB1_SIGNALING_DN		34	-0.459018	-1.38503	0.10101	0.838438	1	5831	tags=47%, list=28%, signal=66%
HATADA_METHYLATED_IN_LUNG_CANCER_DN	HATADA_METHYLATED_IN_LUNG_CANCER_DN		36	-0.523474	-1.38017	0.0505051	0.85122	1	5348	tags=47%, list=26%, signal=64%
WEBER_METHYLATED_ICP_IN_FIBROBLAST	WEBER_METHYLATED_ICP_IN_FIBROBLAST		22	-0.565288	-1.37666	0.0592885	0.857819	1	2838	tags=41%, list=14%, signal=47%
RAHMAN_TP53_TARGETS_PHOSPHORYLATED	RAHMAN_TP53_TARGETS_PHOSPHORYLATED		21	-0.464747	-1.37612	0.163522	0.852435	1	8459	tags=71%, list=41%, signal=121%
LEE_METASTASIS_AND_RNA_PROCESSING_UP	LEE_METASTASIS_AND_RNA_PROCESSING_UP		17	-0.468585	-1.37478	0.145194	0.850472	1	7544	tags=53%, list=37%, signal=84%
SANSOM_APC_TARGETS_REQUIRE_MYC	SANSOM_APC_TARGETS_REQUIRE_MYC		204	-0.322979	-1.37305	0.120253	0.850054	1	5688	tags=44%, list=28%, signal=60%
CAFFAREL_RESPONSE_TO_THC_24HR_5_DN	CAFFAREL_RESPONSE_TO_THC_24HR_5_DN		59	-0.392723	-1.36864	0.164927	0.860873	1	6667	tags=49%, list=33%, signal=73%
ACEVEDO_NORMAL_TISSUE_ADJACENT_TO_LIVER_TUMOR_DN	ACEVEDO_NORMAL_TISSUE_ADJACENT_TO_LIVER_TUMOR_DN		346	-0.285124	-1.36476	0.101392	0.869828	1	5942	tags=37%, list=29%, signal=51%
REACTOME_M_G1_TRANSITION	REACTOME_M_G1_TRANSITION		72	-0.479888	-1.35439	0.236402	0.906335	1	6806	tags=54%, list=33%, signal=81%
GRADE_METASTASIS_DN	GRADE_METASTASIS_DN		45	-0.380908	-1.34823	0.212982	0.924854	1	7458	tags=60%, list=36%, signal=94%
GINESTIER_BREAST_CANCER_20Q13_AMPLIFICATION_DN	GINESTIER_BREAST_CANCER_20Q13_AMPLIFICATION_DN		155	-0.308944	-1.34251	0.236364	0.941634	1	6844	tags=36%, list=33%, signal=54%
KEGG_ALZHEIMERS_DISEASE	KEGG_ALZHEIMERS_DISEASE		157	-0.286519	-1.34215	0.104508	0.935182	1	6126	tags=46%, list=30%, signal=65%
WANG_TUMOR_INVASIVENESS_UP	WANG_TUMOR_INVASIVENESS_UP		370	-0.210825	-1.34215	0.155789	0.927326	1	6883	tags=41%, list=34%, signal=60%
REACTOME_S_PHASE	REACTOME_S_PHASE		100	-0.42434	-1.34114	0.259184	0.923773	1	7969	tags=63%, list=39%, signal=103%
JEON_SMAD6_TARGETS_DN	JEON_SMAD6_TARGETS_DN		18	-0.587655	-1.34032	0.175	0.919545	1	937	tags=22%, list=5%, signal=23%
MARIADASON_RESPONSE_TO_BUTYRATE_CURCUMIN_SULINDAC_TSA_8	MARIADASON_RESPONSE_TO_BUTYRATE_CURCUMIN_SULINDAC_TSA_8		15	-0.476058	-1.3395	0.139721	0.915458	1	3857	tags=40%, list=19%, signal=49%
SCIAN_CELL_CYCLE_TARGETS_OF_TP53_AND_TP73_DN	SCIAN_CELL_CYCLE_TARGETS_OF_TP53_AND_TP73_DN		22	-0.636454	-1.33181	0.228571	0.94094	1	5186	tags=64%, list=25%, signal=85%
REACTOME_CELL_CYCLE_CHECKPOINTS	REACTOME_CELL_CYCLE_CHECKPOINTS		105	-0.424042	-1.32871	0.261759	0.946646	1	7969	tags=58%, list=39%, signal=95%
FOSTER_KDM1A_TARGETS_DN	FOSTER_KDM1A_TARGETS_DN		204	-0.291196	-1.32813	0.14557	0.941717	1	5900	tags=35%, list=29%, signal=48%
REACTOME_ASSEMBLY_OF_THE_PRE_REPLICATIVE_COMPLEX	REACTOME_ASSEMBLY_OF_THE_PRE_REPLICATIVE_COMPLEX		57	-0.457311	-1.32576	0.252033	0.944269	1	7969	tags=63%, list=39%, signal=103%
LU_EZH2_TARGETS_UP	LU_EZH2_TARGETS_UP		279	-0.350217	-1.32474	0.164634	0.941026	1	5880	tags=46%, list=29%, signal=64%
WELCSH_BRCA1_TARGETS_DN	WELCSH_BRCA1_TARGETS_DN		137	-0.326245	-1.32307	0.237895	0.940727	1	8509	tags=53%, list=42%, signal=89%
HOLLEMAN_ASPARAGINASE_RESISTANCE_ALL_UP	HOLLEMAN_ASPARAGINASE_RESISTANCE_ALL_UP		22	-0.438289	-1.32096	0.164384	0.942337	1	4675	tags=55%, list=23%, signal=71%
REACTOME_RNA_POL_III_TRANSCRIPTION_INITIATION_FROM_TYPE_3_PROMOTER	REACTOME_RNA_POL_III_TRANSCRIPTION_INITIATION_FROM_TYPE_3_PROMOTER		26	-0.341068	-1.31965	0.166333	0.94065	1	7459	tags=50%, list=36%, signal=78%
REACTOME_ACTIVATION_OF_THE_PRE_REPLICATIVE_COMPLEX	REACTOME_ACTIVATION_OF_THE_PRE_REPLICATIVE_COMPLEX		24	-0.618354	-1.3192	0.232759	0.935274	1	6030	tags=63%, list=29%, signal=88%
CHOW_RASSF1_TARGETS_DN	CHOW_RASSF1_TARGETS_DN		29	-0.371879	-1.31535	0.195122	0.944645	1	7155	tags=52%, list=35%, signal=79%
BURTON_ADIPOGENESIS_PEAK_AT_24HR	BURTON_ADIPOGENESIS_PEAK_AT_24HR		42	-0.562431	-1.30496	0.252101	0.981505	1	6667	tags=64%, list=33%, signal=95%
TIMOFEEVA_GROWTH_STRESS_VIA_STAT1_DN	TIMOFEEVA_GROWTH_STRESS_VIA_STAT1_DN		16	-0.441823	-1.30356	0.208251	0.979963	1	4777	tags=44%, list=23%, signal=57%
REACTOME_SYNTHESIS_OF_DNA	REACTOME_SYNTHESIS_OF_DNA		84	-0.424769	-1.29943	0.26875	0.99029	1	7969	tags=63%, list=39%, signal=103%
REACTOME_ACTIVATION_OF_ATR_IN_RESPONSE_TO_REPLICATION_STRESS	REACTOME_ACTIVATION_OF_ATR_IN_RESPONSE_TO_REPLICATION_STRESS		29	-0.580928	-1.29814	0.270968	0.988616	1	6320	tags=59%, list=31%, signal=85%
KIM_GASTRIC_CANCER_CHEMOSENSITIVITY	KIM_GASTRIC_CANCER_CHEMOSENSITIVITY		100	-0.343267	-1.29492	0.101266	0.994875	1	5127	tags=37%, list=25%, signal=49%
REACTOME_G2_M_CHECKPOINTS	REACTOME_G2_M_CHECKPOINTS		35	-0.571808	-1.29367	0.274298	0.99297	1	5836	tags=57%, list=28%, signal=80%
KEGG_MISMATCH_REPAIR	KEGG_MISMATCH_REPAIR		23	-0.445174	-1.29008	0.248447	1	1	6030	tags=48%, list=29%, signal=68%
SU_SALIVARY_GLAND	SU_SALIVARY_GLAND		16	-0.575967	-1.28963	0.157464	0.996001	1	1932	tags=38%, list=9%, signal=41%
CERIBELLI_GENES_INACTIVE_AND_BOUND_BY_NFY	CERIBELLI_GENES_INACTIVE_AND_BOUND_BY_NFY		35	-0.47236	-1.28766	0.111984	0.997269	1	3341	tags=31%, list=16%, signal=37%
SCHLOSSER_SERUM_RESPONSE_AUGMENTED_BY_MYC	SCHLOSSER_SERUM_RESPONSE_AUGMENTED_BY_MYC		106	-0.273456	-1.28695	0.179872	0.993282	1	7351	tags=46%, list=36%, signal=72%
BENPORATH_MYC_TARGETS_WITH_EBOX	BENPORATH_MYC_TARGETS_WITH_EBOX		227	-0.28017	-1.28483	0.133874	0.994968	1	6085	tags=40%, list=30%, signal=56%
REACTOME_MITOCHONDRIAL_TRNA_AMINOACYLATION	REACTOME_MITOCHONDRIAL_TRNA_AMINOACYLATION		21	-0.398051	-1.28479	0.213693	0.988259	1	7535	tags=48%, list=37%, signal=75%
HANN_RESISTANCE_TO_BCL2_INHIBITOR_DN	HANN_RESISTANCE_TO_BCL2_INHIBITOR_DN		46	-0.445703	-1.28334	0.129032	0.987704	1	3676	tags=43%, list=18%, signal=53%
REACTOME_METABOLISM_OF_PROTEINS	REACTOME_METABOLISM_OF_PROTEINS		422	-0.229174	-1.28245	0.151386	0.984678	1	6412	tags=45%, list=31%, signal=64%
REACTOME_ELONGATION_ARREST_AND_RECOVERY	REACTOME_ELONGATION_ARREST_AND_RECOVERY		31	-0.342217	-1.28195	0.183884	0.979973	1	8225	tags=65%, list=40%, signal=108%
REACTOME_DESTABILIZATION_OF_MRNA_BY_BRF1	REACTOME_DESTABILIZATION_OF_MRNA_BY_BRF1		17	-0.365676	-1.28147	0.167006	0.975252	1	6644	tags=53%, list=32%, signal=78%
PELLICCIOTTA_HDAC_IN_ANTIGEN_PRESENTATION_UP	PELLICCIOTTA_HDAC_IN_ANTIGEN_PRESENTATION_UP		64	-0.285989	-1.27495	0.239351	0.995318	1	7969	tags=45%, list=39%, signal=74%
REACTOME_PROCESSING_OF_CAPPED_INTRONLESS_PRE_MRNA	REACTOME_PROCESSING_OF_CAPPED_INTRONLESS_PRE_MRNA		23	-0.397418	-1.27447	0.195312	0.990665	1	7304	tags=52%, list=36%, signal=81%
REACTOME_G1_S_TRANSITION	REACTOME_G1_S_TRANSITION		100	-0.424346	-1.27412	0.291925	0.98547	1	7969	tags=61%, list=39%, signal=99%
KEGG_PROTEASOME	KEGG_PROTEASOME		44	-0.430985	-1.2713	0.27439	0.990479	1	8368	tags=64%, list=41%, signal=107%
REACTOME_MRNA_3_END_PROCESSING	REACTOME_MRNA_3_END_PROCESSING		25	-0.395612	-1.26631	0.203024	1	1	7441	tags=44%, list=36%, signal=69%
KEGG_PYRIMIDINE_METABOLISM	KEGG_PYRIMIDINE_METABOLISM		97	-0.276925	-1.26485	0.190283	1	1	6339	tags=43%, list=31%, signal=62%
VANTVEER_BREAST_CANCER_BRCA1_UP	VANTVEER_BREAST_CANCER_BRCA1_UP		35	-0.458331	-1.26472	0.238776	0.998032	1	6284	tags=49%, list=31%, signal=70%
REACTOME_RNA_POL_III_TRANSCRIPTION_TERMINATION	REACTOME_RNA_POL_III_TRANSCRIPTION_TERMINATION		19	-0.372223	-1.26323	0.224	0.997601	1	6743	tags=47%, list=33%, signal=71%
WAKASUGI_HAVE_ZNF143_BINDING_SITES	WAKASUGI_HAVE_ZNF143_BINDING_SITES		58	-0.362275	-1.26123	0.270661	0.999507	1	6320	tags=41%, list=31%, signal=60%
REACTOME_CDT1_ASSOCIATION_WITH_THE_CDC6_ORC_ORIGIN_COMPLEX	REACTOME_CDT1_ASSOCIATION_WITH_THE_CDC6_ORC_ORIGIN_COMPLEX		48	-0.426078	-1.26111	0.28252	0.993712	1	7969	tags=60%, list=39%, signal=99%
GAZIN_EPIGENETIC_SILENCING_BY_KRAS	GAZIN_EPIGENETIC_SILENCING_BY_KRAS		26	-0.403234	-1.25975	0.199584	0.992677	1	2795	tags=27%, list=14%, signal=31%
PUJANA_BREAST_CANCER_WITH_BRCA1_MUTATED_UP	PUJANA_BREAST_CANCER_WITH_BRCA1_MUTATED_UP		53	-0.538686	-1.25713	0.331942	0.997115	1	6199	tags=58%, list=30%, signal=84%
MODY_HIPPOCAMPUS_POSTNATAL	MODY_HIPPOCAMPUS_POSTNATAL		62	-0.362123	-1.2542	0.175542	1	1	5113	tags=32%, list=25%, signal=43%
HU_GENOTOXIC_DAMAGE_4HR	HU_GENOTOXIC_DAMAGE_4HR		34	-0.476938	-1.2529	0.309237	1	1	5641	tags=50%, list=28%, signal=69%
AMUNDSON_GAMMA_RADIATION_RESPONSE	AMUNDSON_GAMMA_RADIATION_RESPONSE		40	-0.602628	-1.25279	0.313525	0.996181	1	5186	tags=55%, list=25%, signal=73%
KIM_TIAL1_TARGETS	KIM_TIAL1_TARGETS		32	-0.394828	-1.25249	0.221532	0.991309	1	4584	tags=41%, list=22%, signal=52%
DACOSTA_UV_RESPONSE_VIA_ERCC3_UP	DACOSTA_UV_RESPONSE_VIA_ERCC3_UP		300	-0.27685	-1.25057	0.218876	0.992841	1	7029	tags=46%, list=34%, signal=68%
WAKABAYASHI_ADIPOGENESIS_PPARG_BOUND_36HR	WAKABAYASHI_ADIPOGENESIS_PPARG_BOUND_36HR		29	-0.299123	-1.25055	0.185859	0.986923	1	3480	tags=24%, list=17%, signal=29%
LANDEMAINE_LUNG_METASTASIS	LANDEMAINE_LUNG_METASTASIS		21	-0.60065	-1.24872	0.268839	0.98835	1	2489	tags=43%, list=12%, signal=49%
KEGG_AMINOACYL_TRNA_BIOSYNTHESIS	KEGG_AMINOACYL_TRNA_BIOSYNTHESIS		41	-0.326361	-1.24831	0.229541	0.984008	1	8166	tags=44%, list=40%, signal=73%
SONG_TARGETS_OF_IE86_CMV_PROTEIN	SONG_TARGETS_OF_IE86_CMV_PROTEIN		60	-0.501991	-1.24752	0.339703	0.981326	1	6432	tags=62%, list=31%, signal=90%
HU_ANGIOGENESIS_DN	HU_ANGIOGENESIS_DN		37	-0.305062	-1.24675	0.221095	0.97859	1	7052	tags=43%, list=34%, signal=66%
REACTOME_DESTABILIZATION_OF_MRNA_BY_TRISTETRAPROLIN_TTP	REACTOME_DESTABILIZATION_OF_MRNA_BY_TRISTETRAPROLIN_TTP		17	-0.351187	-1.24564	0.208748	0.977075	1	6644	tags=53%, list=32%, signal=78%
REACTOME_SCF_BETA_TRCP_MEDIATED_DEGRADATION_OF_EMI1	REACTOME_SCF_BETA_TRCP_MEDIATED_DEGRADATION_OF_EMI1		49	-0.395444	-1.24254	0.29918	0.983638	1	7969	tags=57%, list=39%, signal=93%
MOREAUX_B_LYMPHOCYTE_MATURATION_BY_TACI_DN	MOREAUX_B_LYMPHOCYTE_MATURATION_BY_TACI_DN		73	-0.331947	-1.24133	0.285421	0.982398	1	7392	tags=52%, list=36%, signal=81%
NUTT_GBM_VS_AO_GLIOMA_DN	NUTT_GBM_VS_AO_GLIOMA_DN		45	-0.344962	-1.23953	0.191268	0.983626	1	6489	tags=60%, list=32%, signal=88%
REACTOME_RNA_POL_II_TRANSCRIPTION	REACTOME_RNA_POL_II_TRANSCRIPTION		93	-0.266036	-1.23755	0.246809	0.985641	1	7007	tags=47%, list=34%, signal=72%
OXFORD_RALA_OR_RALB_TARGETS_UP	OXFORD_RALA_OR_RALB_TARGETS_UP		48	-0.522757	-1.23652	0.313152	0.983922	1	6367	tags=65%, list=31%, signal=93%
WEBER_METHYLATED_HCP_IN_SPERM_UP	WEBER_METHYLATED_HCP_IN_SPERM_UP		20	-0.515281	-1.22939	0.175758	1	1	4629	tags=55%, list=23%, signal=71%
JIANG_AGING_HYPOTHALAMUS_UP	JIANG_AGING_HYPOTHALAMUS_UP		47	-0.310609	-1.22645	0.234927	1	1	6565	tags=47%, list=32%, signal=69%
AUNG_GASTRIC_CANCER	AUNG_GASTRIC_CANCER		53	-0.348668	-1.22606	0.168317	1	1	4423	tags=32%, list=22%, signal=41%
MOOTHA_PGC	MOOTHA_PGC		414	-0.227081	-1.22552	0.223553	1	1	5577	tags=34%, list=27%, signal=45%
REACTOME_P53_INDEPENDENT_G1_S_DNA_DAMAGE_CHECKPOINT	REACTOME_P53_INDEPENDENT_G1_S_DNA_DAMAGE_CHECKPOINT		48	-0.403559	-1.22547	0.300813	0.997821	1	7969	tags=60%, list=39%, signal=99%
KORKOLA_CORRELATED_WITH_POU5F1	KORKOLA_CORRELATED_WITH_POU5F1		32	-0.475297	-1.22426	0.200855	0.997044	1	6002	tags=59%, list=29%, signal=84%
KYNG_ENVIRONMENTAL_STRESS_RESPONSE_NOT_BY_GAMMA_IN_WS	KYNG_ENVIRONMENTAL_STRESS_RESPONSE_NOT_BY_GAMMA_IN_WS		32	-0.326072	-1.22376	0.236948	0.993305	1	5476	tags=34%, list=27%, signal=47%
FLOTHO_PEDIATRIC_ALL_THERAPY_RESPONSE_UP	FLOTHO_PEDIATRIC_ALL_THERAPY_RESPONSE_UP		53	-0.309265	-1.22355	0.25	0.988692	1	5095	tags=42%, list=25%, signal=55%
MOOTHA_TCA	MOOTHA_TCA		16	-0.414612	-1.22339	0.211462	0.983956	1	8691	tags=69%, list=42%, signal=119%
KAUFFMANN_DNA_REPAIR_GENES	KAUFFMANN_DNA_REPAIR_GENES		222	-0.306935	-1.22263	0.319915	0.981417	1	6483	tags=38%, list=32%, signal=55%
ISHIDA_E2F_TARGETS	ISHIDA_E2F_TARGETS		53	-0.567021	-1.21781	0.358178	0.993851	1	6004	tags=64%, list=29%, signal=90%
HU_GENOTOXIC_DAMAGE_24HR	HU_GENOTOXIC_DAMAGE_24HR		35	-0.426974	-1.21725	0.282	0.990645	1	5641	tags=49%, list=28%, signal=67%
SA_G1_AND_S_PHASES	SA_G1_AND_S_PHASES		15	-0.460672	-1.21635	0.254032	0.988942	1	2774	tags=27%, list=14%, signal=31%
REACTOME_PREFOLDIN_MEDIATED_TRANSFER_OF_SUBSTRATE_TO_CCT_TRIC	REACTOME_PREFOLDIN_MEDIATED_TRANSFER_OF_SUBSTRATE_TO_CCT_TRIC		25	-0.416154	-1.21567	0.252066	0.986275	1	2506	tags=20%, list=12%, signal=23%
OSMAN_BLADDER_CANCER_DN	OSMAN_BLADDER_CANCER_DN		383	-0.216733	-1.21442	0.245614	0.985631	1	4688	tags=27%, list=23%, signal=35%
LI_CYTIDINE_ANALOGS_CYCTOTOXICITY	LI_CYTIDINE_ANALOGS_CYCTOTOXICITY		15	-0.397229	-1.21386	0.248031	0.982563	1	6435	tags=53%, list=31%, signal=78%
REACTOME_APC_C_CDC20_MEDIATED_DEGRADATION_OF_MITOTIC_PROTEINS	REACTOME_APC_C_CDC20_MEDIATED_DEGRADATION_OF_MITOTIC_PROTEINS		65	-0.382082	-1.21356	0.3125	0.978497	1	7969	tags=57%, list=39%, signal=93%
ACOSTA_PROLIFERATION_INDEPENDENT_MYC_TARGETS_UP	ACOSTA_PROLIFERATION_INDEPENDENT_MYC_TARGETS_UP		83	-0.304499	-1.21248	0.232033	0.977405	1	6024	tags=37%, list=29%, signal=53%
ZHOU_TNF_SIGNALING_30MIN	ZHOU_TNF_SIGNALING_30MIN		53	-0.333533	-1.21211	0.259921	0.973683	1	4708	tags=34%, list=23%, signal=44%
LY_AGING_MIDDLE_DN	LY_AGING_MIDDLE_DN		16	-0.661761	-1.20628	0.360825	0.989916	1	5186	tags=69%, list=25%, signal=92%
REACTOME_APC_C_CDH1_MEDIATED_DEGRADATION_OF_CDC20_AND_OTHER_APC_C_CDH1_TARGETED_PROTEINS_IN_LATE_MITOSIS_EARLY_G1	REACTOME_APC_C_CDH1_MEDIATED_DEGRADATION_OF_CDC20_AND_OTHER_APC_C_CDH1_TARGETED_PROTEINS_IN_LATE_MITOSIS_EARLY_G1		64	-0.391106	-1.20608	0.327869	0.985579	1	7981	tags=58%, list=39%, signal=94%
PID_RHODOPSIN_PATHWAY	PID_RHODOPSIN_PATHWAY		24	-0.490421	-1.20572	0.175439	0.981968	1	4464	tags=46%, list=22%, signal=59%
REACTOME_INHIBITION_OF_INSULIN_SECRETION_BY_ADRENALINE_NORADRENALINE	REACTOME_INHIBITION_OF_INSULIN_SECRETION_BY_ADRENALINE_NORADRENALINE		25	-0.434853	-1.2056	0.201207	0.977443	1	1639	tags=28%, list=8%, signal=30%
SMID_BREAST_CANCER_LUMINAL_A_DN	SMID_BREAST_CANCER_LUMINAL_A_DN		18	-0.672133	-1.20252	0.331942	0.983431	1	5537	tags=78%, list=27%, signal=106%
MATTIOLI_MGUS_VS_PCL	MATTIOLI_MGUS_VS_PCL		99	-0.303354	-1.19888	0.293635	0.991621	1	7696	tags=44%, list=38%, signal=71%
REACTOME_REGULATION_OF_MITOTIC_CELL_CYCLE	REACTOME_REGULATION_OF_MITOTIC_CELL_CYCLE		77	-0.376765	-1.19711	0.353783	0.993322	1	7981	tags=57%, list=39%, signal=93%
DOANE_BREAST_CANCER_ESR1_DN	DOANE_BREAST_CANCER_ESR1_DN		48	-0.648824	-1.19608	0.332649	0.992104	1	2243	tags=50%, list=11%, signal=56%
SANSOM_APC_MYC_TARGETS	SANSOM_APC_MYC_TARGETS		214	-0.220773	-1.19517	0.234834	0.990484	1	4581	tags=27%, list=22%, signal=35%
MEISSNER_NPC_ICP_WITH_H3K4ME3	MEISSNER_NPC_ICP_WITH_H3K4ME3		19	-0.36918	-1.19504	0.251509	0.986082	1	6182	tags=53%, list=30%, signal=75%
REACTOME_RNA_POL_III_TRANSCRIPTION	REACTOME_RNA_POL_III_TRANSCRIPTION		33	-0.285982	-1.19128	0.26572	0.994928	1	6233	tags=39%, list=30%, signal=57%
CHEN_ETV5_TARGETS_TESTIS	CHEN_ETV5_TARGETS_TESTIS		23	-0.497947	-1.18921	0.305263	0.997811	1	6335	tags=57%, list=31%, signal=82%
PENG_GLUTAMINE_DEPRIVATION_DN	PENG_GLUTAMINE_DEPRIVATION_DN		328	-0.253324	-1.18796	0.339703	0.997594	1	7378	tags=42%, list=36%, signal=65%
MATZUK_MEIOTIC_AND_DNA_REPAIR	MATZUK_MEIOTIC_AND_DNA_REPAIR		39	-0.38636	-1.18608	0.231557	0.999267	1	3827	tags=33%, list=19%, signal=41%
JUBAN_TARGETS_OF_SPI1_AND_FLI1_DN	JUBAN_TARGETS_OF_SPI1_AND_FLI1_DN		89	-0.273572	-1.18595	0.226782	0.99497	1	6055	tags=42%, list=30%, signal=59%
REACTOME_P53_DEPENDENT_G1_DNA_DAMAGE_RESPONSE	REACTOME_P53_DEPENDENT_G1_DNA_DAMAGE_RESPONSE		53	-0.353019	-1.18444	0.354251	0.995619	1	8525	tags=60%, list=42%, signal=103%
REACTOME_REGULATION_OF_ORNITHINE_DECARBOXYLASE_ODC	REACTOME_REGULATION_OF_ORNITHINE_DECARBOXYLASE_ODC		48	-0.373301	-1.18322	0.334694	0.995122	1	8525	tags=63%, list=42%, signal=107%
REACTOME_CDK_MEDIATED_PHOSPHORYLATION_AND_REMOVAL_OF_CDC6	REACTOME_CDK_MEDIATED_PHOSPHORYLATION_AND_REMOVAL_OF_CDC6		46	-0.393328	-1.18102	0.334004	0.998436	1	7969	tags=59%, list=39%, signal=96%
WHITE_NEUROBLASTOMA_WITH_1P36.3_DELETION	WHITE_NEUROBLASTOMA_WITH_1P36.3_DELETION		20	-0.476459	-1.18094	0.297619	0.994032	1	5307	tags=45%, list=26%, signal=61%
BENPORATH_PROLIFERATION	BENPORATH_PROLIFERATION		145	-0.473898	-1.18024	0.372188	0.991768	1	7704	tags=66%, list=38%, signal=104%
PID_ERB_GENOMIC_PATHWAY	PID_ERB_GENOMIC_PATHWAY		15	-0.412882	-1.17957	0.272189	0.989456	1	957	tags=20%, list=5%, signal=21%
FLECHNER_PBL_KIDNEY_TRANSPLANT_REJECTED_VS_OK_DN	FLECHNER_PBL_KIDNEY_TRANSPLANT_REJECTED_VS_OK_DN		49	-0.278776	-1.17879	0.29979	0.987508	1	4736	tags=33%, list=23%, signal=42%
CHEOK_RESPONSE_TO_MERCAPTOPURINE_AND_HD_MTX_DN	CHEOK_RESPONSE_TO_MERCAPTOPURINE_AND_HD_MTX_DN		25	-0.351687	-1.17646	0.273267	0.991038	1	6024	tags=44%, list=29%, signal=62%
CROONQUIST_NRAS_SIGNALING_DN	CROONQUIST_NRAS_SIGNALING_DN		72	-0.545991	-1.17637	0.395445	0.986881	1	6320	tags=65%, list=31%, signal=94%
KEGG_PHENYLALANINE_METABOLISM	KEGG_PHENYLALANINE_METABOLISM		18	-0.488259	-1.17364	0.228571	0.991651	1	4563	tags=56%, list=22%, signal=71%
IIZUKA_LIVER_CANCER_PROGRESSION_L0_L1_DN	IIZUKA_LIVER_CANCER_PROGRESSION_L0_L1_DN		19	-0.380191	-1.17241	0.267748	0.991412	1	3208	tags=32%, list=16%, signal=37%
REACTOME_METABOLISM_OF_NON_CODING_RNA	REACTOME_METABOLISM_OF_NON_CODING_RNA		47	-0.325728	-1.17219	0.286561	0.987763	1	6784	tags=38%, list=33%, signal=57%
NIKOLSKY_BREAST_CANCER_7P22_AMPLICON	NIKOLSKY_BREAST_CANCER_7P22_AMPLICON		36	-0.416501	-1.17183	0.314928	0.984619	1	4044	tags=33%, list=20%, signal=41%
REACTOME_GLUCONEOGENESIS	REACTOME_GLUCONEOGENESIS		31	-0.378169	-1.17149	0.234834	0.981383	1	8249	tags=65%, list=40%, signal=108%
SOTIRIOU_BREAST_CANCER_GRADE_1_VS_3_UP	SOTIRIOU_BREAST_CANCER_GRADE_1_VS_3_UP		149	-0.559747	-1.17121	0.397541	0.977934	1	6965	tags=64%, list=34%, signal=96%
LUI_THYROID_CANCER_PAX8_PPARG_DN	LUI_THYROID_CANCER_PAX8_PPARG_DN		44	-0.283332	-1.16975	0.272541	0.978632	1	7645	tags=48%, list=37%, signal=76%
BONOME_OVARIAN_CANCER_POOR_SURVIVAL_DN	BONOME_OVARIAN_CANCER_POOR_SURVIVAL_DN		22	-0.404631	-1.16744	0.329243	0.982323	1	7477	tags=68%, list=36%, signal=107%
OKAWA_NEUROBLASTOMA_1P36_31_DELETION	OKAWA_NEUROBLASTOMA_1P36_31_DELETION		22	-0.451352	-1.16488	0.319608	0.986585	1	5307	tags=41%, list=26%, signal=55%
REACTOME_TRANSPORT_OF_VITAMINS_NUCLEOSIDES_AND_RELATED_MOLECULES	REACTOME_TRANSPORT_OF_VITAMINS_NUCLEOSIDES_AND_RELATED_MOLECULES		31	-0.391375	-1.16266	0.224568	0.989988	1	1949	tags=26%, list=10%, signal=28%
MEISSNER_BRAIN_HCP_WITH_H3K4ME2	MEISSNER_BRAIN_HCP_WITH_H3K4ME2		17	-0.494125	-1.16077	0.260437	0.991908	1	1900	tags=41%, list=9%, signal=45%
LEE_LIVER_CANCER_SURVIVAL_DN	LEE_LIVER_CANCER_SURVIVAL_DN		172	-0.294871	-1.16006	0.354772	0.990074	1	6168	tags=44%, list=30%, signal=62%
DACOSTA_UV_RESPONSE_VIA_ERCC3_COMMON_UP	DACOSTA_UV_RESPONSE_VIA_ERCC3_COMMON_UP		74	-0.313587	-1.16	0.25	0.986	1	5088	tags=38%, list=25%, signal=50%
BAKKER_FOXO3_TARGETS_DN	BAKKER_FOXO3_TARGETS_DN		179	-0.261723	-1.15579	0.230769	0.996178	1	3599	tags=24%, list=18%, signal=29%
KEGG_REGULATION_OF_AUTOPHAGY	KEGG_REGULATION_OF_AUTOPHAGY		34	-0.371536	-1.1538	0.299603	0.998648	1	2851	tags=21%, list=14%, signal=24%
REACTOME_MITOTIC_G1_G1_S_PHASES	REACTOME_MITOTIC_G1_G1_S_PHASES		124	-0.360614	-1.14966	0.395918	1	1	7969	tags=59%, list=39%, signal=96%
CHAUHAN_RESPONSE_TO_METHOXYESTRADIOL_DN	CHAUHAN_RESPONSE_TO_METHOXYESTRADIOL_DN		97	-0.24932	-1.14924	0.325678	1	1	7930	tags=47%, list=39%, signal=77%
KEGG_MATURITY_ONSET_DIABETES_OF_THE_YOUNG	KEGG_MATURITY_ONSET_DIABETES_OF_THE_YOUNG		23	-0.46702	-1.14877	0.225549	1	1	3411	tags=35%, list=17%, signal=42%
RHODES_UNDIFFERENTIATED_CANCER	RHODES_UNDIFFERENTIATED_CANCER		68	-0.481739	-1.14875	0.420523	0.999127	1	5863	tags=62%, list=29%, signal=86%
HESS_TARGETS_OF_HOXA9_AND_MEIS1_UP	HESS_TARGETS_OF_HOXA9_AND_MEIS1_UP		65	-0.302133	-1.14831	0.292887	0.996484	1	5601	tags=48%, list=27%, signal=65%
REACTOME_RNA_POL_III_CHAIN_ELONGATION	REACTOME_RNA_POL_III_CHAIN_ELONGATION		17	-0.337074	-1.14337	0.296078	1	1	6743	tags=47%, list=33%, signal=70%
REACTOME_TRAF6_MEDIATED_NFKB_ACTIVATION	REACTOME_TRAF6_MEDIATED_NFKB_ACTIVATION		21	-0.396514	-1.14112	0.327273	1	1	1553	tags=14%, list=8%, signal=15%
BENPORATH_ES_CORE_NINE_CORRELATED	BENPORATH_ES_CORE_NINE_CORRELATED		100	-0.427234	-1.1361	0.37247	1	1	6002	tags=46%, list=29%, signal=65%
REACTOME_TRNA_AMINOACYLATION	REACTOME_TRNA_AMINOACYLATION		42	-0.324742	-1.1359	0.324435	1	1	8412	tags=48%, list=41%, signal=81%
REACTOME_G_BETA_GAMMA_SIGNALLING_THROUGH_PLC_BETA	REACTOME_G_BETA_GAMMA_SIGNALLING_THROUGH_PLC_BETA		20	-0.423586	-1.13589	0.292089	1	1	1639	tags=25%, list=8%, signal=27%
REACTOME_TRANSCRIPTION_COUPLED_NER_TC_NER	REACTOME_TRANSCRIPTION_COUPLED_NER_TC_NER		44	-0.298688	-1.13558	0.316008	1	1	6743	tags=48%, list=33%, signal=71%
REACTOME_MICRORNA_MIRNA_BIOGENESIS	REACTOME_MICRORNA_MIRNA_BIOGENESIS		21	-0.33457	-1.13421	0.290581	1	1	8788	tags=57%, list=43%, signal=100%
MOREAUX_MULTIPLE_MYELOMA_BY_TACI_DN	MOREAUX_MULTIPLE_MYELOMA_BY_TACI_DN		169	-0.234891	-1.13402	0.353306	1	1	7392	tags=43%, list=36%, signal=66%
BARRIER_COLON_CANCER_RECURRENCE_DN	BARRIER_COLON_CANCER_RECURRENCE_DN		19	-0.36621	-1.13185	0.320988	1	1	6690	tags=47%, list=33%, signal=70%
REACTOME_AUTODEGRADATION_OF_THE_E3_UBIQUITIN_LIGASE_COP1	REACTOME_AUTODEGRADATION_OF_THE_E3_UBIQUITIN_LIGASE_COP1		47	-0.357863	-1.13135	0.350101	1	1	7969	tags=55%, list=39%, signal=90%
REACTOME_REGULATION_OF_MRNA_STABILITY_BY_PROTEINS_THAT_BIND_AU_RICH_ELEMENTS	REACTOME_REGULATION_OF_MRNA_STABILITY_BY_PROTEINS_THAT_BIND_AU_RICH_ELEMENTS		81	-0.272085	-1.13127	0.368	1	1	7969	tags=53%, list=39%, signal=86%
AIYAR_COBRA1_TARGETS_DN	AIYAR_COBRA1_TARGETS_DN		28	-0.317462	-1.13009	0.307393	1	1	6405	tags=39%, list=31%, signal=57%
BRACHAT_RESPONSE_TO_CAMPTOTHECIN_DN	BRACHAT_RESPONSE_TO_CAMPTOTHECIN_DN		44	-0.279167	-1.1299	0.302905	1	1	7613	tags=45%, list=37%, signal=72%
REACTOME_SIGNALING_BY_WNT	REACTOME_SIGNALING_BY_WNT		63	-0.287601	-1.12885	0.337232	1	1	8525	tags=54%, list=42%, signal=92%
REACTOME_LATE_PHASE_OF_HIV_LIFE_CYCLE	REACTOME_LATE_PHASE_OF_HIV_LIFE_CYCLE		101	-0.227951	-1.12792	0.337526	1	1	7007	tags=42%, list=34%, signal=63%
REACTOME_VIF_MEDIATED_DEGRADATION_OF_APOBEC3G	REACTOME_VIF_MEDIATED_DEGRADATION_OF_APOBEC3G		49	-0.36316	-1.12656	0.369781	1	1	7969	tags=59%, list=39%, signal=97%
REACTOME_ORC1_REMOVAL_FROM_CHROMATIN	REACTOME_ORC1_REMOVAL_FROM_CHROMATIN		59	-0.350595	-1.12435	0.392713	1	1	7969	tags=58%, list=39%, signal=94%
GARCIA_TARGETS_OF_FLI1_AND_DAX1_DN	GARCIA_TARGETS_OF_FLI1_AND_DAX1_DN		170	-0.299112	-1.12312	0.355932	1	1	6784	tags=44%, list=33%, signal=65%
DIRMEIER_LMP1_RESPONSE_LATE_DN	DIRMEIER_LMP1_RESPONSE_LATE_DN		30	-0.411683	-1.12061	0.383234	1	1	5572	tags=53%, list=27%, signal=73%
NADERI_BREAST_CANCER_PROGNOSIS_UP	NADERI_BREAST_CANCER_PROGNOSIS_UP		50	-0.470052	-1.12057	0.378378	1	1	6827	tags=58%, list=33%, signal=87%
REACTOME_CYCLIN_E_ASSOCIATED_EVENTS_DURING_G1_S_TRANSITION_	REACTOME_CYCLIN_E_ASSOCIATED_EVENTS_DURING_G1_S_TRANSITION_		62	-0.33923	-1.11811	0.377823	1	1	7969	tags=58%, list=39%, signal=95%
GRAHAM_NORMAL_QUIESCENT_VS_NORMAL_DIVIDING_DN	GRAHAM_NORMAL_QUIESCENT_VS_NORMAL_DIVIDING_DN		87	-0.483123	-1.11799	0.409465	1	1	6389	tags=63%, list=31%, signal=91%
BIOCARTA_PROTEASOME_PATHWAY	BIOCARTA_PROTEASOME_PATHWAY		28	-0.421034	-1.11598	0.347648	1	1	8368	tags=64%, list=41%, signal=108%
JIANG_VHL_TARGETS	JIANG_VHL_TARGETS		135	-0.200029	-1.11506	0.338086	1	1	6845	tags=36%, list=33%, signal=54%
GOLUB_ALL_VS_AML_UP	GOLUB_ALL_VS_AML_UP		24	-0.33504	-1.11376	0.364017	1	1	6919	tags=46%, list=34%, signal=69%
GAZDA_DIAMOND_BLACKFAN_ANEMIA_MYELOID_DN	GAZDA_DIAMOND_BLACKFAN_ANEMIA_MYELOID_DN		37	-0.283943	-1.11187	0.336083	1	1	2948	tags=19%, list=14%, signal=22%
REACTOME_CONVERSION_FROM_APC_C_CDC20_TO_APC_C_CDH1_IN_LATE_ANAPHASE	REACTOME_CONVERSION_FROM_APC_C_CDC20_TO_APC_C_CDH1_IN_LATE_ANAPHASE		16	-0.375884	-1.11099	0.373673	1	1	2386	tags=19%, list=12%, signal=21%
KEGG_CITRATE_CYCLE_TCA_CYCLE	KEGG_CITRATE_CYCLE_TCA_CYCLE		30	-0.302039	-1.11034	0.330693	1	1	8691	tags=57%, list=42%, signal=98%
REACTOME_HIV_LIFE_CYCLE	REACTOME_HIV_LIFE_CYCLE		114	-0.219535	-1.10867	0.358051	1	1	7096	tags=44%, list=35%, signal=67%
SLEBOS_HEAD_AND_NECK_CANCER_WITH_HPV_UP	SLEBOS_HEAD_AND_NECK_CANCER_WITH_HPV_UP		81	-0.364605	-1.10749	0.355748	1	1	6357	tags=43%, list=31%, signal=62%
MORI_LARGE_PRE_BII_LYMPHOCYTE_UP	MORI_LARGE_PRE_BII_LYMPHOCYTE_UP		85	-0.431051	-1.10658	0.440994	1	1	7335	tags=56%, list=36%, signal=88%
ZHOU_CELL_CYCLE_GENES_IN_IR_RESPONSE_6HR	ZHOU_CELL_CYCLE_GENES_IN_IR_RESPONSE_6HR		85	-0.470329	-1.10379	0.444444	1	1	7514	tags=68%, list=37%, signal=107%
KEGG_HOMOLOGOUS_RECOMBINATION	KEGG_HOMOLOGOUS_RECOMBINATION		26	-0.43228	-1.10361	0.406571	1	1	6222	tags=58%, list=30%, signal=83%
ROSTY_CERVICAL_CANCER_PROLIFERATION_CLUSTER	ROSTY_CERVICAL_CANCER_PROLIFERATION_CLUSTER		140	-0.510394	-1.10331	0.450704	1	1	6483	tags=59%, list=32%, signal=86%
BANDRES_RESPONSE_TO_CARMUSTIN_MGMT_24HR_DN	BANDRES_RESPONSE_TO_CARMUSTIN_MGMT_24HR_DN		33	-0.392728	-1.10146	0.317269	1	1	1021	tags=18%, list=5%, signal=19%
HOLLERN_MICROACINAR_BREAST_TUMOR_UP	HOLLERN_MICROACINAR_BREAST_TUMOR_UP		32	-0.393979	-1.10143	0.29666	1	1	3882	tags=31%, list=19%, signal=38%
MEISSNER_BRAIN_HCP_WITH_H3_UNMETHYLATED	MEISSNER_BRAIN_HCP_WITH_H3_UNMETHYLATED		35	-0.423505	-1.10036	0.289524	1	1	3047	tags=37%, list=15%, signal=44%
REACTOME_DESTABILIZATION_OF_MRNA_BY_AUF1_HNRNP_D0	REACTOME_DESTABILIZATION_OF_MRNA_BY_AUF1_HNRNP_D0		50	-0.351923	-1.09871	0.370742	1	1	7969	tags=58%, list=39%, signal=95%
REACTOME_DNA_REPLICATION	REACTOME_DNA_REPLICATION		182	-0.376609	-1.09853	0.442149	1	1	6113	tags=42%, list=30%, signal=60%
REACTOME_APC_C_CDC20_MEDIATED_DEGRADATION_OF_CYCLIN_B	REACTOME_APC_C_CDC20_MEDIATED_DEGRADATION_OF_CYCLIN_B		19	-0.386005	-1.09802	0.386076	1	1	7171	tags=53%, list=35%, signal=81%
FOURNIER_ACINAR_DEVELOPMENT_LATE_DN	FOURNIER_ACINAR_DEVELOPMENT_LATE_DN		21	-0.477839	-1.09695	0.390558	1	1	4819	tags=43%, list=24%, signal=56%
REACTOME_ER_PHAGOSOME_PATHWAY	REACTOME_ER_PHAGOSOME_PATHWAY		53	-0.367757	-1.09635	0.384458	1	1	7969	tags=58%, list=39%, signal=95%
MANALO_HYPOXIA_DN	MANALO_HYPOXIA_DN		283	-0.334233	-1.09547	0.417879	1	1	7518	tags=54%, list=37%, signal=84%
REACTOME_CELL_CYCLE_MITOTIC	REACTOME_CELL_CYCLE_MITOTIC		298	-0.334899	-1.09503	0.418219	1	1	7028	tags=45%, list=34%, signal=67%
FERNANDEZ_BOUND_BY_MYC	FERNANDEZ_BOUND_BY_MYC		181	-0.250585	-1.09488	0.321577	0.997514	1	6106	tags=42%, list=30%, signal=59%
WHITFIELD_CELL_CYCLE_G1_S	WHITFIELD_CELL_CYCLE_G1_S		138	-0.297998	-1.09219	0.399142	1	1	5021	tags=33%, list=24%, signal=44%
YANG_BREAST_CANCER_ESR1_DN	YANG_BREAST_CANCER_ESR1_DN		25	-0.556878	-1.09146	0.419223	1	1	3408	tags=40%, list=17%, signal=48%
DARWICHE_PAPILLOMA_RISK_HIGH_UP	DARWICHE_PAPILLOMA_RISK_HIGH_UP		144	-0.307842	-1.08848	0.325153	1	1	5053	tags=34%, list=25%, signal=45%
LOPEZ_EPITHELIOID_MESOTHELIOMA	LOPEZ_EPITHELIOID_MESOTHELIOMA		17	-0.436729	-1.0882	0.319066	1	1	2992	tags=29%, list=15%, signal=34%
CROONQUIST_IL6_DEPRIVATION_DN	CROONQUIST_IL6_DEPRIVATION_DN		98	-0.478143	-1.0855	0.455301	1	1	6642	tags=62%, list=32%, signal=92%
MORI_EMU_MYC_LYMPHOMA_BY_ONSET_TIME_UP	MORI_EMU_MYC_LYMPHOMA_BY_ONSET_TIME_UP		103	-0.25495	-1.08521	0.390852	1	1	7021	tags=51%, list=34%, signal=78%
STEIN_ESRRA_TARGETS_UP	STEIN_ESRRA_TARGETS_UP		383	-0.193314	-1.0851	0.307229	1	1	6545	tags=35%, list=32%, signal=51%
DARWICHE_SKIN_TUMOR_PROMOTER_UP	DARWICHE_SKIN_TUMOR_PROMOTER_UP		138	-0.300228	-1.08266	0.334694	1	1	5053	tags=34%, list=25%, signal=45%
FRASOR_RESPONSE_TO_SERM_OR_FULVESTRANT_DN	FRASOR_RESPONSE_TO_SERM_OR_FULVESTRANT_DN		50	-0.423463	-1.0826	0.438034	1	1	6644	tags=62%, list=32%, signal=92%
NIKOLSKY_BREAST_CANCER_5P15_AMPLICON	NIKOLSKY_BREAST_CANCER_5P15_AMPLICON		26	-0.441594	-1.08224	0.362725	1	1	4200	tags=35%, list=20%, signal=43%
GAVIN_FOXP3_TARGETS_CLUSTER_T7	GAVIN_FOXP3_TARGETS_CLUSTER_T7		97	-0.244282	-1.08142	0.394251	1	1	7458	tags=40%, list=36%, signal=63%
NIKOLSKY_BREAST_CANCER_1Q21_AMPLICON	NIKOLSKY_BREAST_CANCER_1Q21_AMPLICON		36	-0.433331	-1.08079	0.396378	1	1	5253	tags=42%, list=26%, signal=56%
REACTOME_DNA_REPAIR	REACTOME_DNA_REPAIR		105	-0.275501	-1.08035	0.391398	0.997979	1	6233	tags=39%, list=30%, signal=56%
REACTOME_SCFSKP2_MEDIATED_DEGRADATION_OF_P27_P21	REACTOME_SCFSKP2_MEDIATED_DEGRADATION_OF_P27_P21		53	-0.344611	-1.08016	0.433198	0.995215	1	7969	tags=58%, list=39%, signal=95%
HEDENFALK_BREAST_CANCER_BRACX_UP	HEDENFALK_BREAST_CANCER_BRACX_UP		20	-0.347135	-1.07956	0.372951	0.993691	1	5804	tags=55%, list=28%, signal=77%
REACTOME_NUCLEOTIDE_EXCISION_REPAIR	REACTOME_NUCLEOTIDE_EXCISION_REPAIR		49	-0.271357	-1.07847	0.352442	0.993761	1	6743	tags=43%, list=33%, signal=64%
MORI_IMMATURE_B_LYMPHOCYTE_DN	MORI_IMMATURE_B_LYMPHOCYTE_DN		89	-0.430133	-1.07835	0.454732	0.99085	1	7335	tags=60%, list=36%, signal=92%
PENG_RAPAMYCIN_RESPONSE_DN	PENG_RAPAMYCIN_RESPONSE_DN		243	-0.246087	-1.07711	0.424947	0.99127	1	7102	tags=39%, list=35%, signal=59%
DAIRKEE_CANCER_PRONE_RESPONSE_BPA	DAIRKEE_CANCER_PRONE_RESPONSE_BPA		51	-0.267228	-1.07607	0.382046	0.99104	1	6245	tags=33%, list=30%, signal=48%
MENSSEN_MYC_TARGETS	MENSSEN_MYC_TARGETS		53	-0.303131	-1.07478	0.426195	0.991615	1	6481	tags=43%, list=32%, signal=63%
GARGALOVIC_RESPONSE_TO_OXIDIZED_PHOSPHOLIPIDS_TURQUOISE_DN	GARGALOVIC_RESPONSE_TO_OXIDIZED_PHOSPHOLIPIDS_TURQUOISE_DN		51	-0.41178	-1.07468	0.428862	0.988651	1	7118	tags=55%, list=35%, signal=84%
HOFMANN_MYELODYSPLASTIC_SYNDROM_LOW_RISK_UP	HOFMANN_MYELODYSPLASTIC_SYNDROM_LOW_RISK_UP		22	-0.43493	-1.07424	0.364583	0.986768	1	2608	tags=27%, list=13%, signal=31%
MORI_PRE_BI_LYMPHOCYTE_UP	MORI_PRE_BI_LYMPHOCYTE_UP		78	-0.374339	-1.07397	0.431535	0.984278	1	6478	tags=50%, list=32%, signal=73%
BOUDOUKHA_BOUND_BY_IGF2BP2	BOUDOUKHA_BOUND_BY_IGF2BP2		109	-0.234878	-1.07354	0.387295	0.982381	1	6048	tags=42%, list=29%, signal=60%
REACTOME_ADP_SIGNALLING_THROUGH_P2RY12	REACTOME_ADP_SIGNALLING_THROUGH_P2RY12		21	-0.394835	-1.0716	0.361616	0.985012	1	1639	tags=24%, list=8%, signal=26%
DAZARD_UV_RESPONSE_CLUSTER_G1	DAZARD_UV_RESPONSE_CLUSTER_G1		67	-0.278376	-1.07149	0.355967	0.982181	1	4831	tags=43%, list=24%, signal=56%
REACTOME_E2F_MEDIATED_REGULATION_OF_DNA_REPLICATION	REACTOME_E2F_MEDIATED_REGULATION_OF_DNA_REPLICATION		27	-0.467078	-1.06936	0.456432	0.985326	1	6297	tags=56%, list=31%, signal=80%
REACTOME_XENOBIOTICS	REACTOME_XENOBIOTICS		15	-0.514759	-1.0683	0.353293	0.985383	1	5250	tags=47%, list=26%, signal=63%
KEGG_TERPENOID_BACKBONE_BIOSYNTHESIS	KEGG_TERPENOID_BACKBONE_BIOSYNTHESIS		15	-0.390972	-1.06661	0.385859	0.98729	1	5540	tags=40%, list=27%, signal=55%
REACTOME_MITOTIC_M_M_G1_PHASES	REACTOME_MITOTIC_M_M_G1_PHASES		162	-0.371059	-1.06485	0.455115	0.989352	1	6220	tags=41%, list=30%, signal=58%
PID_HNF3B_PATHWAY	PID_HNF3B_PATHWAY		44	-0.371042	-1.06437	0.358025	0.987699	1	2898	tags=27%, list=14%, signal=32%
RORIE_TARGETS_OF_EWSR1_FLI1_FUSION_DN	RORIE_TARGETS_OF_EWSR1_FLI1_FUSION_DN		30	-0.451555	-1.06241	0.384146	0.990317	1	2281	tags=33%, list=11%, signal=37%
NIELSEN_GIST_AND_SYNOVIAL_SARCOMA_UP	NIELSEN_GIST_AND_SYNOVIAL_SARCOMA_UP		20	-0.469955	-1.06157	0.402806	0.98971	1	4724	tags=60%, list=23%, signal=78%
REACTOME_TRANSFERRIN_ENDOCYTOSIS_AND_RECYCLING	REACTOME_TRANSFERRIN_ENDOCYTOSIS_AND_RECYCLING		25	-0.35212	-1.059	0.389899	0.994203	1	768	tags=16%, list=4%, signal=17%
PUJANA_BRCA_CENTERED_NETWORK	PUJANA_BRCA_CENTERED_NETWORK		115	-0.366677	-1.05801	0.449485	0.993992	1	6024	tags=39%, list=29%, signal=55%
KAMMINGA_EZH2_TARGETS	KAMMINGA_EZH2_TARGETS		41	-0.448924	-1.05768	0.47817	0.991896	1	6965	tags=54%, list=34%, signal=81%
PYEON_HPV_POSITIVE_TUMORS_UP	PYEON_HPV_POSITIVE_TUMORS_UP		87	-0.357162	-1.05658	0.406316	0.992134	1	6267	tags=39%, list=31%, signal=56%
MISSIAGLIA_REGULATED_BY_METHYLATION_DN	MISSIAGLIA_REGULATED_BY_METHYLATION_DN		117	-0.364104	-1.05654	0.444215	0.989154	1	6996	tags=54%, list=34%, signal=81%
REACTOME_CELL_CYCLE	REACTOME_CELL_CYCLE		385	-0.314923	-1.05446	0.425051	0.992092	1	6113	tags=38%, list=30%, signal=53%
CHAUHAN_RESPONSE_TO_METHOXYESTRADIOL_UP	CHAUHAN_RESPONSE_TO_METHOXYESTRADIOL_UP		47	-0.297914	-1.05343	0.39485	0.992011	1	4689	tags=36%, list=23%, signal=47%
YAO_TEMPORAL_RESPONSE_TO_PROGESTERONE_CLUSTER_7	YAO_TEMPORAL_RESPONSE_TO_PROGESTERONE_CLUSTER_7		75	-0.228938	-1.05328	0.409274	0.989398	1	5445	tags=28%, list=27%, signal=38%
WEBER_METHYLATED_LCP_IN_SPERM_UP	WEBER_METHYLATED_LCP_IN_SPERM_UP		15	-0.464602	-1.05311	0.375746	0.986851	1	3505	tags=73%, list=17%, signal=88%
REACTOME_POST_CHAPERONIN_TUBULIN_FOLDING_PATHWAY	REACTOME_POST_CHAPERONIN_TUBULIN_FOLDING_PATHWAY		16	-0.419622	-1.05264	0.413502	0.985257	1	4942	tags=38%, list=24%, signal=49%
KANG_DOXORUBICIN_RESISTANCE_UP	KANG_DOXORUBICIN_RESISTANCE_UP		54	-0.520299	-1.05212	0.49177	0.98375	1	6667	tags=69%, list=33%, signal=101%
KEGG_TASTE_TRANSDUCTION	KEGG_TASTE_TRANSDUCTION		51	-0.39812	-1.0516	0.383817	0.982304	1	2998	tags=25%, list=15%, signal=30%
REACTOME_AUTODEGRADATION_OF_CDH1_BY_CDH1_APC_C	REACTOME_AUTODEGRADATION_OF_CDH1_BY_CDH1_APC_C		56	-0.320574	-1.05155	0.409543	0.979464	1	7969	tags=54%, list=39%, signal=87%
PID_ATM_PATHWAY	PID_ATM_PATHWAY		34	-0.319502	-1.04932	0.413088	0.983012	1	2220	tags=18%, list=11%, signal=20%
ELVIDGE_HIF1A_AND_HIF2A_TARGETS_UP	ELVIDGE_HIF1A_AND_HIF2A_TARGETS_UP		41	-0.282863	-1.04924	0.38171	0.980295	1	4999	tags=32%, list=24%, signal=42%
WELCH_GATA1_TARGETS	WELCH_GATA1_TARGETS		22	-0.371756	-1.04799	0.414286	0.980824	1	3488	tags=32%, list=17%, signal=38%
NIKOLSKY_BREAST_CANCER_16Q24_AMPLICON	NIKOLSKY_BREAST_CANCER_16Q24_AMPLICON		51	-0.402309	-1.04669	0.42348	0.981591	1	6227	tags=55%, list=30%, signal=79%
DANG_REGULATED_BY_MYC_UP	DANG_REGULATED_BY_MYC_UP		67	-0.270545	-1.04198	0.396378	0.992314	1	4910	tags=36%, list=24%, signal=47%
ZHAN_MULTIPLE_MYELOMA_PR_UP	ZHAN_MULTIPLE_MYELOMA_PR_UP		45	-0.539331	-1.04187	0.516194	0.989628	1	6965	tags=67%, list=34%, signal=101%
KEGG_CELL_CYCLE	KEGG_CELL_CYCLE		118	-0.32339	-1.03959	0.450644	0.993378	1	5640	tags=37%, list=28%, signal=51%
REACTOME_SIGNALING_BY_NODAL	REACTOME_SIGNALING_BY_NODAL		18	-0.410786	-1.03812	0.427146	0.994694	1	3315	tags=28%, list=16%, signal=33%
SMID_BREAST_CANCER_RELAPSE_IN_BRAIN_UP	SMID_BREAST_CANCER_RELAPSE_IN_BRAIN_UP		39	-0.525482	-1.03792	0.453061	0.992321	1	2678	tags=41%, list=13%, signal=47%
MURAKAMI_UV_RESPONSE_24HR	MURAKAMI_UV_RESPONSE_24HR		20	-0.416157	-1.03745	0.408367	0.990752	1	4616	tags=40%, list=23%, signal=52%
SCHLOSSER_MYC_TARGETS_REPRESSED_BY_SERUM	SCHLOSSER_MYC_TARGETS_REPRESSED_BY_SERUM		155	-0.233792	-1.0373	0.39876	0.988276	1	9284	tags=54%, list=45%, signal=98%
PUJANA_XPRSS_INT_NETWORK	PUJANA_XPRSS_INT_NETWORK		161	-0.349862	-1.03684	0.465409	0.986787	1	6478	tags=40%, list=32%, signal=58%
WALLACE_PROSTATE_CANCER_UP	WALLACE_PROSTATE_CANCER_UP		20	-0.323558	-1.03539	0.390438	0.988151	1	4457	tags=35%, list=22%, signal=45%
FERRANDO_T_ALL_WITH_MLL_ENL_FUSION_DN	FERRANDO_T_ALL_WITH_MLL_ENL_FUSION_DN		85	-0.282993	-1.03308	0.420168	0.991859	1	6145	tags=39%, list=30%, signal=55%
REACTOME_ENDOSOMAL_SORTING_COMPLEX_REQUIRED_FOR_TRANSPORT_ESCRT	REACTOME_ENDOSOMAL_SORTING_COMPLEX_REQUIRED_FOR_TRANSPORT_ESCRT		25	-0.284806	-1.03173	0.399606	0.992879	1	6186	tags=24%, list=30%, signal=34%
GAJATE_RESPONSE_TO_TRABECTEDIN_DN	GAJATE_RESPONSE_TO_TRABECTEDIN_DN		19	-0.320676	-1.03154	0.431727	0.990538	1	4054	tags=32%, list=20%, signal=39%
BASSO_B_LYMPHOCYTE_NETWORK	BASSO_B_LYMPHOCYTE_NETWORK		140	-0.242682	-1.02651	0.432773	1	1	7004	tags=45%, list=34%, signal=68%
TIEN_INTESTINE_PROBIOTICS_24HR_DN	TIEN_INTESTINE_PROBIOTICS_24HR_DN		210	-0.178445	-1.0207	0.430041	1	1	6199	tags=30%, list=30%, signal=43%
FINETTI_BREAST_CANCER_KINOME_RED	FINETTI_BREAST_CANCER_KINOME_RED		16	-0.580989	-1.02013	0.538934	1	1	8460	tags=88%, list=41%, signal=149%
MIKKELSEN_MCV6_LCP_WITH_H3K27ME3	MIKKELSEN_MCV6_LCP_WITH_H3K27ME3		25	-0.404875	-1.01866	0.417178	1	1	6221	tags=52%, list=30%, signal=75%
REACTOME_OXYGEN_DEPENDENT_PROLINE_HYDROXYLATION_OF_HYPOXIA_INDUCIBLE_FACTOR_ALPHA	REACTOME_OXYGEN_DEPENDENT_PROLINE_HYDROXYLATION_OF_HYPOXIA_INDUCIBLE_FACTOR_ALPHA		16	-0.324259	-1.01818	0.468254	1	1	5712	tags=44%, list=28%, signal=61%
EGUCHI_CELL_CYCLE_RB1_TARGETS	EGUCHI_CELL_CYCLE_RB1_TARGETS		23	-0.529606	-1.01744	0.534836	1	1	6220	tags=57%, list=30%, signal=81%
REACTOME_ZINC_TRANSPORTERS	REACTOME_ZINC_TRANSPORTERS		15	-0.408794	-1.01691	0.455969	1	1	839	tags=20%, list=4%, signal=21%
REACTOME_SULFUR_AMINO_ACID_METABOLISM	REACTOME_SULFUR_AMINO_ACID_METABOLISM		24	-0.298517	-1.01603	0.420118	1	1	7407	tags=46%, list=36%, signal=72%
KORKOLA_YOLK_SAC_TUMOR_UP	KORKOLA_YOLK_SAC_TUMOR_UP		20	-0.365258	-1.01487	0.453608	1	1	6929	tags=65%, list=34%, signal=98%
VANDESLUIS_NORMAL_EMBRYOS_DN	VANDESLUIS_NORMAL_EMBRYOS_DN		25	-0.371362	-1.01414	0.424547	1	1	967	tags=20%, list=5%, signal=21%
WHITEFORD_PEDIATRIC_CANCER_MARKERS	WHITEFORD_PEDIATRIC_CANCER_MARKERS		116	-0.422391	-1.0139	0.487654	1	1	6483	tags=59%, list=32%, signal=86%
WEBER_METHYLATED_HCP_IN_FIBROBLAST_DN	WEBER_METHYLATED_HCP_IN_FIBROBLAST_DN		41	-0.385132	-1.01381	0.39165	1	1	5376	tags=49%, list=26%, signal=66%
REACTOME_PROSTACYCLIN_SIGNALLING_THROUGH_PROSTACYCLIN_RECEPTOR	REACTOME_PROSTACYCLIN_SIGNALLING_THROUGH_PROSTACYCLIN_RECEPTOR		19	-0.388975	-1.01299	0.436326	1	1	1639	tags=26%, list=8%, signal=29%
AGUIRRE_PANCREATIC_CANCER_COPY_NUMBER_DN	AGUIRRE_PANCREATIC_CANCER_COPY_NUMBER_DN		227	-0.172597	-1.00841	0.419831	1	1	7083	tags=37%, list=35%, signal=56%
NIKOLSKY_BREAST_CANCER_6P24_P22_AMPLICON	NIKOLSKY_BREAST_CANCER_6P24_P22_AMPLICON		21	-0.38401	-1.00753	0.46856	1	1	5139	tags=38%, list=25%, signal=51%
PENG_LEUCINE_DEPRIVATION_DN	PENG_LEUCINE_DEPRIVATION_DN		185	-0.253322	-1.00651	0.480435	1	1	7378	tags=41%, list=36%, signal=63%
JAIN_NFKB_SIGNALING	JAIN_NFKB_SIGNALING		73	-0.203847	-1.00402	0.429448	1	1	4997	tags=29%, list=24%, signal=38%
REACTOME_RNA_POL_II_TRANSCRIPTION_PRE_INITIATION_AND_PROMOTER_OPENING	REACTOME_RNA_POL_II_TRANSCRIPTION_PRE_INITIATION_AND_PROMOTER_OPENING		40	-0.243821	-1.00382	0.44186	1	1	6743	tags=52%, list=33%, signal=78%
BHATI_G2M_ARREST_BY_2METHOXYESTRADIOL_DN	BHATI_G2M_ARREST_BY_2METHOXYESTRADIOL_DN		123	-0.257233	-1.0033	0.432596	1	1	3707	tags=25%, list=18%, signal=31%
REACTOME_REGULATORY_RNA_PATHWAYS	REACTOME_REGULATORY_RNA_PATHWAYS		24	-0.264094	-1.00295	0.418651	1	1	8788	tags=50%, list=43%, signal=87%
JOHANSSON_GLIOMAGENESIS_BY_PDGFB_DN	JOHANSSON_GLIOMAGENESIS_BY_PDGFB_DN		20	-0.377657	-1.00182	0.462656	1	1	4060	tags=40%, list=20%, signal=50%
REACTOME_RNA_POL_III_TRANSCRIPTION_INITIATION_FROM_TYPE_2_PROMOTER	REACTOME_RNA_POL_III_TRANSCRIPTION_INITIATION_FROM_TYPE_2_PROMOTER		23	-0.261544	-0.999525	0.424362	1	1	6743	tags=48%, list=33%, signal=71%
TOMIDA_METASTASIS_DN	TOMIDA_METASTASIS_DN		18	-0.333718	-0.995542	0.483034	1	1	3367	tags=17%, list=16%, signal=20%
DAZARD_UV_RESPONSE_CLUSTER_G4	DAZARD_UV_RESPONSE_CLUSTER_G4		19	-0.386142	-0.994634	0.442623	1	1	1092	tags=21%, list=5%, signal=22%
SIMBULAN_PARP1_TARGETS_DN	SIMBULAN_PARP1_TARGETS_DN		17	-0.423516	-0.990486	0.488753	1	1	5186	tags=59%, list=25%, signal=79%
REACTOME_G1_S_SPECIFIC_TRANSCRIPTION	REACTOME_G1_S_SPECIFIC_TRANSCRIPTION		16	-0.510735	-0.989407	0.54088	1	1	6297	tags=69%, list=31%, signal=99%
KYNG_RESPONSE_TO_H2O2_VIA_ERCC6_DN	KYNG_RESPONSE_TO_H2O2_VIA_ERCC6_DN		46	-0.265352	-0.989235	0.483806	1	1	6544	tags=43%, list=32%, signal=64%
WHITFIELD_CELL_CYCLE_LITERATURE	WHITFIELD_CELL_CYCLE_LITERATURE		44	-0.476504	-0.988183	0.540816	1	1	6004	tags=57%, list=29%, signal=80%
ZEMBUTSU_SENSITIVITY_TO_FLUOROURACIL	ZEMBUTSU_SENSITIVITY_TO_FLUOROURACIL		15	-0.358732	-0.988148	0.487805	1	1	607	tags=20%, list=3%, signal=21%
LEE_LIVER_CANCER_DENA_DN	LEE_LIVER_CANCER_DENA_DN		74	-0.342822	-0.987747	0.448819	1	1	3355	tags=27%, list=16%, signal=32%
REACTOME_MITOTIC_G2_G2_M_PHASES	REACTOME_MITOTIC_G2_G2_M_PHASES		74	-0.274628	-0.985387	0.484407	1	1	7250	tags=42%, list=35%, signal=65%
REACTOME_SYNTHESIS_AND_INTERCONVERSION_OF_NUCLEOTIDE_DI_AND_TRIPHOSPHATES	REACTOME_SYNTHESIS_AND_INTERCONVERSION_OF_NUCLEOTIDE_DI_AND_TRIPHOSPHATES		18	-0.308731	-0.985072	0.452191	1	1	6767	tags=44%, list=33%, signal=66%
LE_NEURONAL_DIFFERENTIATION_DN	LE_NEURONAL_DIFFERENTIATION_DN		19	-0.442598	-0.984952	0.514644	1	1	3930	tags=53%, list=19%, signal=65%
APPIERTO_RESPONSE_TO_FENRETINIDE_DN	APPIERTO_RESPONSE_TO_FENRETINIDE_DN		50	-0.236211	-0.984602	0.460285	1	1	4694	tags=30%, list=23%, signal=39%
MOREIRA_RESPONSE_TO_TSA_UP	MOREIRA_RESPONSE_TO_TSA_UP		27	-0.304935	-0.980313	0.476673	1	1	5711	tags=44%, list=28%, signal=62%
SESTO_RESPONSE_TO_UV_C4	SESTO_RESPONSE_TO_UV_C4		18	-0.364623	-0.97979	0.49703	1	1	7867	tags=56%, list=38%, signal=90%
KYNG_RESPONSE_TO_H2O2_VIA_ERCC6	KYNG_RESPONSE_TO_H2O2_VIA_ERCC6		17	-0.339377	-0.978112	0.489712	1	1	5822	tags=47%, list=28%, signal=66%
CROMER_METASTASIS_DN	CROMER_METASTASIS_DN		80	-0.298718	-0.977292	0.468354	1	1	4987	tags=31%, list=24%, signal=41%
KAUFFMANN_MELANOMA_RELAPSE_UP	KAUFFMANN_MELANOMA_RELAPSE_UP		58	-0.415888	-0.976434	0.532632	1	1	6483	tags=52%, list=32%, signal=75%
NATSUME_RESPONSE_TO_INTERFERON_BETA_DN	NATSUME_RESPONSE_TO_INTERFERON_BETA_DN		51	-0.283096	-0.975826	0.46507	1	1	4955	tags=33%, list=24%, signal=44%
MARIADASON_RESPONSE_TO_BUTYRATE_SULINDAC_4	MARIADASON_RESPONSE_TO_BUTYRATE_SULINDAC_4		20	-0.327308	-0.975561	0.446089	1	1	4911	tags=40%, list=24%, signal=53%
ZHOU_CELL_CYCLE_GENES_IN_IR_RESPONSE_24HR	ZHOU_CELL_CYCLE_GENES_IN_IR_RESPONSE_24HR		127	-0.379641	-0.973567	0.534274	1	1	6667	tags=54%, list=33%, signal=80%
BIOCARTA_G2_PATHWAY	BIOCARTA_G2_PATHWAY		24	-0.364256	-0.973273	0.507042	1	1	2479	tags=21%, list=12%, signal=24%
REACTOME_METABOLISM_OF_AMINO_ACIDS_AND_DERIVATIVES	REACTOME_METABOLISM_OF_AMINO_ACIDS_AND_DERIVATIVES		196	-0.240097	-0.971904	0.488189	1	1	6113	tags=36%, list=30%, signal=51%
CHANDRAN_METASTASIS_TOP50_DN	CHANDRAN_METASTASIS_TOP50_DN		45	-0.268602	-0.968852	0.485477	1	1	6159	tags=33%, list=30%, signal=48%
DAZARD_RESPONSE_TO_UV_NHEK_UP	DAZARD_RESPONSE_TO_UV_NHEK_UP		236	-0.249816	-0.968148	0.466667	1	1	5515	tags=37%, list=27%, signal=50%
BARRIER_CANCER_RELAPSE_NORMAL_SAMPLE_DN	BARRIER_CANCER_RELAPSE_NORMAL_SAMPLE_DN		30	-0.271994	-0.96584	0.457594	1	1	9030	tags=53%, list=44%, signal=95%
VALK_AML_CLUSTER_7	VALK_AML_CLUSTER_7		28	-0.342112	-0.965684	0.525316	1	1	3133	tags=29%, list=15%, signal=34%
KORKOLA_SEMINOMA_UP	KORKOLA_SEMINOMA_UP		42	-0.300323	-0.96439	0.471287	1	1	5572	tags=38%, list=27%, signal=52%
XU_RESPONSE_TO_TRETINOIN_AND_NSC682994_DN	XU_RESPONSE_TO_TRETINOIN_AND_NSC682994_DN		15	-0.367065	-0.964147	0.521459	1	1	4736	tags=33%, list=23%, signal=43%
HOFFMANN_LARGE_TO_SMALL_PRE_BII_LYMPHOCYTE_UP	HOFFMANN_LARGE_TO_SMALL_PRE_BII_LYMPHOCYTE_UP		158	-0.34525	-0.963272	0.514286	1	1	5831	tags=38%, list=28%, signal=53%
WANG_THOC1_TARGETS_DN	WANG_THOC1_TARGETS_DN		20	-0.383707	-0.961117	0.498024	1	1	2876	tags=30%, list=14%, signal=35%
MOOTHA_GLUCONEOGENESIS	MOOTHA_GLUCONEOGENESIS		32	-0.318637	-0.960054	0.534654	1	1	5128	tags=34%, list=25%, signal=46%
ABE_INNER_EAR	ABE_INNER_EAR		48	-0.326715	-0.957731	0.493927	1	1	3780	tags=42%, list=18%, signal=51%
REACTOME_RNA_POL_II_PRE_TRANSCRIPTION_EVENTS	REACTOME_RNA_POL_II_PRE_TRANSCRIPTION_EVENTS		59	-0.207627	-0.956405	0.470968	1	1	7007	tags=49%, list=34%, signal=74%
GARGALOVIC_RESPONSE_TO_OXIDIZED_PHOSPHOLIPIDS_RED_UP	GARGALOVIC_RESPONSE_TO_OXIDIZED_PHOSPHOLIPIDS_RED_UP		17	-0.362084	-0.956101	0.533605	1	1	5880	tags=53%, list=29%, signal=74%
RIZ_ERYTHROID_DIFFERENTIATION	RIZ_ERYTHROID_DIFFERENTIATION		77	-0.278036	-0.955463	0.493802	1	1	7225	tags=45%, list=35%, signal=70%
KEGG_NUCLEOTIDE_EXCISION_REPAIR	KEGG_NUCLEOTIDE_EXCISION_REPAIR		44	-0.23872	-0.955129	0.476483	1	1	6030	tags=36%, list=29%, signal=51%
JEPSEN_SMRT_TARGETS	JEPSEN_SMRT_TARGETS		33	-0.301728	-0.955	0.526205	1	1	1324	tags=15%, list=6%, signal=16%
ZHAN_V1_LATE_DIFFERENTIATION_GENES_DN	ZHAN_V1_LATE_DIFFERENTIATION_GENES_DN		15	-0.391401	-0.95476	0.535857	1	1	8006	tags=60%, list=39%, signal=98%
BENPORATH_ES_2	BENPORATH_ES_2		37	-0.362044	-0.953292	0.527054	1	1	5071	tags=43%, list=25%, signal=57%
REACTOME_HIV_INFECTION	REACTOME_HIV_INFECTION		192	-0.191958	-0.952882	0.494929	1	1	6822	tags=38%, list=33%, signal=56%
SHEPARD_CRUSH_AND_BURN_MUTANT_UP	SHEPARD_CRUSH_AND_BURN_MUTANT_UP		194	-0.20593	-0.952663	0.51503	1	1	5346	tags=32%, list=26%, signal=43%
SMITH_TERT_TARGETS_UP	SMITH_TERT_TARGETS_UP		142	-0.208033	-0.951932	0.521008	1	1	6526	tags=37%, list=32%, signal=54%
REACTOME_CHOLESTEROL_BIOSYNTHESIS	REACTOME_CHOLESTEROL_BIOSYNTHESIS		21	-0.335807	-0.951858	0.483936	1	1	2656	tags=19%, list=13%, signal=22%
DARWICHE_SQUAMOUS_CELL_CARCINOMA_UP	DARWICHE_SQUAMOUS_CELL_CARCINOMA_UP		144	-0.260998	-0.951327	0.504202	1	1	5053	tags=33%, list=25%, signal=43%
SHEDDEN_LUNG_CANCER_POOR_SURVIVAL_A6	SHEDDEN_LUNG_CANCER_POOR_SURVIVAL_A6		451	-0.321863	-0.950118	0.51417	1	1	6667	tags=44%, list=33%, signal=64%
CARDOSO_RESPONSE_TO_GAMMA_RADIATION_AND_3AB	CARDOSO_RESPONSE_TO_GAMMA_RADIATION_AND_3AB		18	-0.309534	-0.94977	0.532673	1	1	5602	tags=33%, list=27%, signal=46%
REACTOME_FORMATION_OF_TUBULIN_FOLDING_INTERMEDIATES_BY_CCT_TRIC	REACTOME_FORMATION_OF_TUBULIN_FOLDING_INTERMEDIATES_BY_CCT_TRIC		19	-0.359325	-0.949628	0.532909	1	1	2506	tags=16%, list=12%, signal=18%
MEISSNER_NPC_ICP_WITH_H3_UNMETHYLATED	MEISSNER_NPC_ICP_WITH_H3_UNMETHYLATED		24	-0.368664	-0.947131	0.521298	1	1	2854	tags=29%, list=14%, signal=34%
ZEMBUTSU_SENSITIVITY_TO_VINBLASTINE	ZEMBUTSU_SENSITIVITY_TO_VINBLASTINE		18	-0.334533	-0.946744	0.5	1	1	6674	tags=56%, list=33%, signal=82%
LOPES_METHYLATED_IN_COLON_CANCER_DN	LOPES_METHYLATED_IN_COLON_CANCER_DN		28	-0.341141	-0.946224	0.521318	1	1	2107	tags=25%, list=10%, signal=28%
REACTOME_UNFOLDED_PROTEIN_RESPONSE	REACTOME_UNFOLDED_PROTEIN_RESPONSE		76	-0.183564	-0.945458	0.491701	1	1	7211	tags=38%, list=35%, signal=59%
THILLAINADESAN_ZNF217_TARGETS_UP	THILLAINADESAN_ZNF217_TARGETS_UP		44	-0.288331	-0.945016	0.525751	1	1	3100	tags=20%, list=15%, signal=24%
BHATTACHARYA_EMBRYONIC_STEM_CELL	BHATTACHARYA_EMBRYONIC_STEM_CELL		88	-0.264925	-0.944251	0.526316	1	1	6373	tags=47%, list=31%, signal=67%
ODONNELL_TARGETS_OF_MYC_AND_TFRC_DN	ODONNELL_TARGETS_OF_MYC_AND_TFRC_DN		45	-0.421118	-0.943969	0.538462	1	1	6393	tags=49%, list=31%, signal=71%
HONRADO_BREAST_CANCER_BRCA1_VS_BRCA2	HONRADO_BREAST_CANCER_BRCA1_VS_BRCA2		18	-0.373915	-0.943442	0.542194	1	1	2728	tags=28%, list=13%, signal=32%
DARWICHE_PAPILLOMA_RISK_LOW_UP	DARWICHE_PAPILLOMA_RISK_LOW_UP		159	-0.263064	-0.943402	0.495935	1	1	4389	tags=28%, list=21%, signal=36%
PUJANA_BRCA2_PCC_NETWORK	PUJANA_BRCA2_PCC_NETWORK		412	-0.269848	-0.942442	0.497934	1	1	7078	tags=42%, list=35%, signal=63%
YAO_TEMPORAL_RESPONSE_TO_PROGESTERONE_CLUSTER_14	YAO_TEMPORAL_RESPONSE_TO_PROGESTERONE_CLUSTER_14		140	-0.208185	-0.94187	0.490946	1	1	6462	tags=36%, list=32%, signal=53%
KEGG_HISTIDINE_METABOLISM	KEGG_HISTIDINE_METABOLISM		29	-0.337836	-0.941422	0.547667	1	1	1096	tags=17%, list=5%, signal=18%
KEGG_NITROGEN_METABOLISM	KEGG_NITROGEN_METABOLISM		23	-0.368941	-0.940953	0.548255	1	1	1431	tags=22%, list=7%, signal=23%
FONTAINE_THYROID_TUMOR_UNCERTAIN_MALIGNANCY_UP	FONTAINE_THYROID_TUMOR_UNCERTAIN_MALIGNANCY_UP		34	-0.317095	-0.937964	0.550403	1	1	5200	tags=29%, list=25%, signal=39%
SHEDDEN_LUNG_CANCER_GOOD_SURVIVAL_A5	SHEDDEN_LUNG_CANCER_GOOD_SURVIVAL_A5		68	-0.251821	-0.936603	0.532567	1	1	7356	tags=43%, list=36%, signal=66%
GUENTHER_GROWTH_SPHERICAL_VS_ADHERENT_UP	GUENTHER_GROWTH_SPHERICAL_VS_ADHERENT_UP		21	-0.401439	-0.935811	0.552894	1	1	3876	tags=33%, list=19%, signal=41%
REACTOME_INSULIN_RECEPTOR_RECYCLING	REACTOME_INSULIN_RECEPTOR_RECYCLING		23	-0.314724	-0.935353	0.515873	1	1	768	tags=13%, list=4%, signal=14%
PID_MYC_ACTIV_PATHWAY	PID_MYC_ACTIV_PATHWAY		79	-0.244348	-0.935165	0.53527	1	1	4549	tags=27%, list=22%, signal=34%
KEEN_RESPONSE_TO_ROSIGLITAZONE_UP	KEEN_RESPONSE_TO_ROSIGLITAZONE_UP		38	-0.274459	-0.934423	0.514463	1	1	5090	tags=39%, list=25%, signal=52%
REACTOME_NEPHRIN_INTERACTIONS	REACTOME_NEPHRIN_INTERACTIONS		19	-0.336284	-0.934306	0.530271	1	1	889	tags=11%, list=4%, signal=11%
REACTOME_THROMBOXANE_SIGNALLING_THROUGH_TP_RECEPTOR	REACTOME_THROMBOXANE_SIGNALLING_THROUGH_TP_RECEPTOR		23	-0.327721	-0.93206	0.55511	1	1	1639	tags=22%, list=8%, signal=24%
BOGNI_TREATMENT_RELATED_MYELOID_LEUKEMIA_UP	BOGNI_TREATMENT_RELATED_MYELOID_LEUKEMIA_UP		29	-0.324516	-0.931587	0.546748	1	1	4683	tags=41%, list=23%, signal=54%
VANTVEER_BREAST_CANCER_ESR1_DN	VANTVEER_BREAST_CANCER_ESR1_DN		236	-0.386495	-0.929847	0.542443	1	1	4537	tags=37%, list=22%, signal=47%
SMID_BREAST_CANCER_RELAPSE_IN_BONE_DN	SMID_BREAST_CANCER_RELAPSE_IN_BONE_DN		296	-0.391228	-0.928412	0.533469	1	1	3296	tags=33%, list=16%, signal=39%
REACTOME_APC_CDC20_MEDIATED_DEGRADATION_OF_NEK2A	REACTOME_APC_CDC20_MEDIATED_DEGRADATION_OF_NEK2A		21	-0.339557	-0.927999	0.53125	1	1	7171	tags=48%, list=35%, signal=73%
MCGOWAN_RSP6_TARGETS_UP	MCGOWAN_RSP6_TARGETS_UP		18	-0.359807	-0.926787	0.555992	1	1	2655	tags=22%, list=13%, signal=26%
COLIN_PILOCYTIC_ASTROCYTOMA_VS_GLIOBLASTOMA_UP	COLIN_PILOCYTIC_ASTROCYTOMA_VS_GLIOBLASTOMA_UP		34	-0.364751	-0.926354	0.534791	1	1	601	tags=21%, list=3%, signal=21%
PID_HDAC_CLASSI_PATHWAY	PID_HDAC_CLASSI_PATHWAY		66	-0.180916	-0.925824	0.545455	1	1	6550	tags=33%, list=32%, signal=49%
REACTOME_G1_PHASE	REACTOME_G1_PHASE		35	-0.270743	-0.925314	0.524211	1	1	6085	tags=40%, list=30%, signal=57%
BURTON_ADIPOGENESIS_5	BURTON_ADIPOGENESIS_5		123	-0.205162	-0.924979	0.532803	1	1	7652	tags=48%, list=37%, signal=76%
KEGG_STEROID_BIOSYNTHESIS	KEGG_STEROID_BIOSYNTHESIS		16	-0.335159	-0.923433	0.54672	1	1	2477	tags=25%, list=12%, signal=28%
REACTOME_TAK1_ACTIVATES_NFKB_BY_PHOSPHORYLATION_AND_ACTIVATION_OF_IKKS_COMPLEX	REACTOME_TAK1_ACTIVATES_NFKB_BY_PHOSPHORYLATION_AND_ACTIVATION_OF_IKKS_COMPLEX		23	-0.323858	-0.923033	0.542857	1	1	1553	tags=13%, list=8%, signal=14%
LIU_IL13_MEMORY_MODEL_UP	LIU_IL13_MEMORY_MODEL_UP		17	-0.335808	-0.922593	0.542017	1	1	5648	tags=41%, list=28%, signal=57%
CHIANG_LIVER_CANCER_SUBCLASS_UNANNOTATED_DN	CHIANG_LIVER_CANCER_SUBCLASS_UNANNOTATED_DN		190	-0.207463	-0.922357	0.523904	1	1	6515	tags=34%, list=32%, signal=50%
REACTOME_METABOLISM_OF_STEROID_HORMONES_AND_VITAMINS_A_AND_D	REACTOME_METABOLISM_OF_STEROID_HORMONES_AND_VITAMINS_A_AND_D		35	-0.348052	-0.921362	0.606362	1	1	5297	tags=43%, list=26%, signal=58%
NIKOLSKY_BREAST_CANCER_19Q13.1_AMPLICON	NIKOLSKY_BREAST_CANCER_19Q13.1_AMPLICON		22	-0.427671	-0.919149	0.582857	1	1	7139	tags=55%, list=35%, signal=84%
MORI_MATURE_B_LYMPHOCYTE_DN	MORI_MATURE_B_LYMPHOCYTE_DN		75	-0.269747	-0.918641	0.533195	1	1	5179	tags=40%, list=25%, signal=53%
REN_BOUND_BY_E2F	REN_BOUND_BY_E2F		60	-0.363555	-0.918567	0.559499	1	1	5905	tags=50%, list=29%, signal=70%
HILLION_HMGA1_TARGETS	HILLION_HMGA1_TARGETS		89	-0.238489	-0.917462	0.580709	1	1	6053	tags=43%, list=30%, signal=60%
MOREAUX_B_LYMPHOCYTE_MATURATION_BY_TACI_UP	MOREAUX_B_LYMPHOCYTE_MATURATION_BY_TACI_UP		87	-0.273887	-0.916994	0.582822	1	1	5547	tags=34%, list=27%, signal=47%
CHIANG_LIVER_CANCER_SUBCLASS_POLYSOMY7_UP	CHIANG_LIVER_CANCER_SUBCLASS_POLYSOMY7_UP		76	-0.285698	-0.916902	0.626482	1	1	2700	tags=25%, list=13%, signal=29%
BYSTRYKH_HEMATOPOIESIS_STEM_CELL_AND_BRAIN_QTL_CIS	BYSTRYKH_HEMATOPOIESIS_STEM_CELL_AND_BRAIN_QTL_CIS		65	-0.167477	-0.916689	0.559761	1	1	7229	tags=31%, list=35%, signal=47%
MIKKELSEN_MCV6_ICP_WITH_H3K27ME3	MIKKELSEN_MCV6_ICP_WITH_H3K27ME3		71	-0.336179	-0.91563	0.63786	1	1	3058	tags=30%, list=15%, signal=35%
RUAN_RESPONSE_TO_TROGLITAZONE_DN	RUAN_RESPONSE_TO_TROGLITAZONE_DN		19	-0.341409	-0.915253	0.546535	1	1	4051	tags=37%, list=20%, signal=46%
GALLUZZI_PERMEABILIZE_MITOCHONDRIA	GALLUZZI_PERMEABILIZE_MITOCHONDRIA		43	-0.240221	-0.914427	0.563197	1	1	5786	tags=28%, list=28%, signal=39%
GRADE_COLON_AND_RECTAL_CANCER_UP	GRADE_COLON_AND_RECTAL_CANCER_UP		279	-0.206098	-0.913381	0.541582	1	1	7993	tags=48%, list=39%, signal=78%
RHEIN_ALL_GLUCOCORTICOID_THERAPY_DN	RHEIN_ALL_GLUCOCORTICOID_THERAPY_DN		358	-0.197657	-0.911832	0.533333	1	1	7622	tags=47%, list=37%, signal=73%
REACTOME_ACTIVATION_OF_KAINATE_RECEPTORS_UPON_GLUTAMATE_BINDING	REACTOME_ACTIVATION_OF_KAINATE_RECEPTORS_UPON_GLUTAMATE_BINDING		31	-0.315741	-0.91073	0.575203	1	1	1639	tags=16%, list=8%, signal=18%
YU_MYC_TARGETS_UP	YU_MYC_TARGETS_UP		42	-0.402059	-0.909943	0.589212	1	1	5640	tags=45%, list=28%, signal=62%
KANG_GLIS3_TARGETS	KANG_GLIS3_TARGETS		36	-0.335922	-0.909888	0.640657	1	1	1324	tags=19%, list=6%, signal=21%
CREIGHTON_AKT1_SIGNALING_VIA_MTOR_UP	CREIGHTON_AKT1_SIGNALING_VIA_MTOR_UP		34	-0.306119	-0.909206	0.543388	1	1	5531	tags=32%, list=27%, signal=44%
REACTOME_REGULATION_OF_GENE_EXPRESSION_IN_BETA_CELLS	REACTOME_REGULATION_OF_GENE_EXPRESSION_IN_BETA_CELLS		18	-0.375622	-0.90897	0.576238	1	1	2767	tags=28%, list=13%, signal=32%
REACTOME_FORMATION_OF_THE_HIV1_EARLY_ELONGATION_COMPLEX	REACTOME_FORMATION_OF_THE_HIV1_EARLY_ELONGATION_COMPLEX		33	-0.243784	-0.907897	0.522634	1	1	6822	tags=39%, list=33%, signal=59%
JIANG_TIP30_TARGETS_DN	JIANG_TIP30_TARGETS_DN		24	-0.295271	-0.907577	0.594321	1	1	6683	tags=38%, list=33%, signal=56%
LOCKWOOD_AMPLIFIED_IN_LUNG_CANCER	LOCKWOOD_AMPLIFIED_IN_LUNG_CANCER		209	-0.167543	-0.906809	0.544715	1	1	7951	tags=45%, list=39%, signal=73%
ZHANG_TLX_TARGETS_60HR_DN	ZHANG_TLX_TARGETS_60HR_DN		267	-0.315674	-0.905832	0.561966	1	1	6389	tags=39%, list=31%, signal=56%
SESTO_RESPONSE_TO_UV_C7	SESTO_RESPONSE_TO_UV_C7		68	-0.27105	-0.902935	0.584551	1	1	5978	tags=43%, list=29%, signal=60%
BIOCARTA_TALL1_PATHWAY	BIOCARTA_TALL1_PATHWAY		15	-0.376014	-0.902302	0.597561	1	1	1669	tags=20%, list=8%, signal=22%
YAO_TEMPORAL_RESPONSE_TO_PROGESTERONE_CLUSTER_9	YAO_TEMPORAL_RESPONSE_TO_PROGESTERONE_CLUSTER_9		76	-0.253714	-0.9002	0.56513	1	1	3443	tags=18%, list=17%, signal=22%
VECCHI_GASTRIC_CANCER_ADVANCED_VS_EARLY_DN	VECCHI_GASTRIC_CANCER_ADVANCED_VS_EARLY_DN		132	-0.290236	-0.899708	0.614108	1	1	3886	tags=30%, list=19%, signal=36%
ROY_WOUND_BLOOD_VESSEL_DN	ROY_WOUND_BLOOD_VESSEL_DN		22	-0.397186	-0.89881	0.578431	1	1	3242	tags=36%, list=16%, signal=43%
VIETOR_IFRD1_TARGETS	VIETOR_IFRD1_TARGETS		23	-0.301771	-0.89812	0.614458	1	1	3816	tags=35%, list=19%, signal=43%
REACTOME_SYNTHESIS_SECRETION_AND_DEACYLATION_OF_GHRELIN	REACTOME_SYNTHESIS_SECRETION_AND_DEACYLATION_OF_GHRELIN		16	-0.365015	-0.896458	0.586639	1	1	119	tags=13%, list=1%, signal=13%
PID_AURORA_B_PATHWAY	PID_AURORA_B_PATHWAY		39	-0.36093	-0.896205	0.590717	1	1	5115	tags=38%, list=25%, signal=51%
HERNANDEZ_MITOTIC_ARREST_BY_DOCETAXEL_2_DN	HERNANDEZ_MITOTIC_ARREST_BY_DOCETAXEL_2_DN		19	-0.339616	-0.895811	0.603239	1	1	2047	tags=26%, list=10%, signal=29%
FOURNIER_ACINAR_DEVELOPMENT_LATE_2	FOURNIER_ACINAR_DEVELOPMENT_LATE_2		268	-0.249874	-0.892089	0.558763	1	1	6696	tags=39%, list=33%, signal=57%
CAFFAREL_RESPONSE_TO_THC_24HR_5_UP	CAFFAREL_RESPONSE_TO_THC_24HR_5_UP		34	-0.247476	-0.890124	0.564315	1	1	7305	tags=50%, list=36%, signal=78%
FAELT_B_CLL_WITH_VH3_21_UP	FAELT_B_CLL_WITH_VH3_21_UP		43	-0.250389	-0.889792	0.530364	1	1	7280	tags=44%, list=36%, signal=68%
REACTOME_CYCLIN_A_B1_ASSOCIATED_EVENTS_DURING_G2_M_TRANSITION	REACTOME_CYCLIN_A_B1_ASSOCIATED_EVENTS_DURING_G2_M_TRANSITION		15	-0.440151	-0.889	0.613779	1	1	7170	tags=60%, list=35%, signal=92%
FERRANDO_HOX11_NEIGHBORS	FERRANDO_HOX11_NEIGHBORS		23	-0.36845	-0.888399	0.598726	1	1	6842	tags=61%, list=33%, signal=91%
DACOSTA_UV_RESPONSE_VIA_ERCC3_XPCS_UP	DACOSTA_UV_RESPONSE_VIA_ERCC3_XPCS_UP		27	-0.237314	-0.887125	0.59761	1	1	4079	tags=22%, list=20%, signal=28%
HUMMERICH_BENIGN_SKIN_TUMOR_UP	HUMMERICH_BENIGN_SKIN_TUMOR_UP		17	-0.415818	-0.886916	0.612245	1	1	7106	tags=53%, list=35%, signal=81%
REACTOME_CYTOSOLIC_TRNA_AMINOACYLATION	REACTOME_CYTOSOLIC_TRNA_AMINOACYLATION		24	-0.306698	-0.884233	0.54918	1	1	9860	tags=71%, list=48%, signal=136%
CERIBELLI_PROMOTERS_INACTIVE_AND_BOUND_BY_NFY	CERIBELLI_PROMOTERS_INACTIVE_AND_BOUND_BY_NFY		34	-0.32759	-0.883485	0.666667	1	1	3689	tags=35%, list=18%, signal=43%
KOBAYASHI_EGFR_SIGNALING_24HR_DN	KOBAYASHI_EGFR_SIGNALING_24HR_DN		246	-0.335897	-0.881924	0.57971	1	1	5900	tags=45%, list=29%, signal=63%
RIZ_ERYTHROID_DIFFERENTIATION_CCNE1	RIZ_ERYTHROID_DIFFERENTIATION_CCNE1		39	-0.260213	-0.881746	0.621118	1	1	7201	tags=44%, list=35%, signal=67%
WONG_ENDMETRIUM_CANCER_UP	WONG_ENDMETRIUM_CANCER_UP		25	-0.374234	-0.880551	0.670886	1	1	1652	tags=24%, list=8%, signal=26%
BOYAULT_LIVER_CANCER_SUBCLASS_G23_UP	BOYAULT_LIVER_CANCER_SUBCLASS_G23_UP		51	-0.319058	-0.88021	0.582809	1	1	4694	tags=29%, list=23%, signal=38%
MAGRANGEAS_MULTIPLE_MYELOMA_IGLL_VS_IGLK_UP	MAGRANGEAS_MULTIPLE_MYELOMA_IGLL_VS_IGLK_UP		41	-0.266671	-0.879989	0.607921	1	1	1625	tags=15%, list=8%, signal=16%
DARWICHE_PAPILLOMA_RISK_LOW_DN	DARWICHE_PAPILLOMA_RISK_LOW_DN		156	-0.206185	-0.879754	0.640756	1	1	5014	tags=27%, list=24%, signal=35%
BERTUCCI_INVASIVE_CARCINOMA_DUCTAL_VS_LOBULAR_UP	BERTUCCI_INVASIVE_CARCINOMA_DUCTAL_VS_LOBULAR_UP		23	-0.26813	-0.879213	0.65098	1	1	1838	tags=17%, list=9%, signal=19%
DURCHDEWALD_SKIN_CARCINOGENESIS_UP	DURCHDEWALD_SKIN_CARCINOGENESIS_UP		84	-0.257058	-0.878136	0.680982	1	1	3896	tags=27%, list=19%, signal=34%
REACTOME_METABOLISM_OF_NUCLEOTIDES	REACTOME_METABOLISM_OF_NUCLEOTIDES		71	-0.2203	-0.877678	0.616842	1	1	6297	tags=37%, list=31%, signal=53%
CHIARETTI_T_ALL_RELAPSE_PROGNOSIS	CHIARETTI_T_ALL_RELAPSE_PROGNOSIS		19	-0.382107	-0.877051	0.618947	1	1	4795	tags=37%, list=23%, signal=48%
WANG_RESPONSE_TO_GSK3_INHIBITOR_SB216763_DN	WANG_RESPONSE_TO_GSK3_INHIBITOR_SB216763_DN		352	-0.267866	-0.876805	0.576763	1	1	5200	tags=32%, list=25%, signal=43%
REACTOME_RECRUITMENT_OF_MITOTIC_CENTROSOME_PROTEINS_AND_COMPLEXES	REACTOME_RECRUITMENT_OF_MITOTIC_CENTROSOME_PROTEINS_AND_COMPLEXES		59	-0.208628	-0.876423	0.535642	1	1	7476	tags=39%, list=36%, signal=61%
ZHAN_VARIABLE_EARLY_DIFFERENTIATION_GENES_DN	ZHAN_VARIABLE_EARLY_DIFFERENTIATION_GENES_DN		30	-0.228882	-0.875856	0.60575	1	1	7952	tags=40%, list=39%, signal=65%
MEISSNER_BRAIN_ICP_WITH_H3K4ME3	MEISSNER_BRAIN_ICP_WITH_H3K4ME3		32	-0.286137	-0.874649	0.648915	1	1	6182	tags=50%, list=30%, signal=71%
ELVIDGE_HYPOXIA_BY_DMOG_DN	ELVIDGE_HYPOXIA_BY_DMOG_DN		58	-0.223441	-0.873192	0.646123	1	1	5583	tags=36%, list=27%, signal=50%
REACTOME_REGULATION_OF_WATER_BALANCE_BY_RENAL_AQUAPORINS	REACTOME_REGULATION_OF_WATER_BALANCE_BY_RENAL_AQUAPORINS		43	-0.274739	-0.872842	0.66348	1	1	1803	tags=19%, list=9%, signal=20%
PENG_LEUCINE_DEPRIVATION_UP	PENG_LEUCINE_DEPRIVATION_UP		137	-0.195586	-0.872808	0.629555	1	1	4769	tags=23%, list=23%, signal=30%
MARSHALL_VIRAL_INFECTION_RESPONSE_DN	MARSHALL_VIRAL_INFECTION_RESPONSE_DN		29	-0.380596	-0.872569	0.621242	1	1	6944	tags=55%, list=34%, signal=83%
TIEN_INTESTINE_PROBIOTICS_2HR_UP	TIEN_INTESTINE_PROBIOTICS_2HR_UP		27	-0.230108	-0.872565	0.603814	1	1	7916	tags=56%, list=39%, signal=90%
LIANG_HEMATOPOIESIS_STEM_CELL_NUMBER_SMALL_VS_HUGE_DN	LIANG_HEMATOPOIESIS_STEM_CELL_NUMBER_SMALL_VS_HUGE_DN		31	-0.282535	-0.869058	0.63048	1	1	4780	tags=26%, list=23%, signal=34%
VANLOO_SP3_TARGETS_DN	VANLOO_SP3_TARGETS_DN		88	-0.248909	-0.86769	0.659919	1	1	4564	tags=33%, list=22%, signal=42%
LIU_SOX4_TARGETS_DN	LIU_SOX4_TARGETS_DN		297	-0.128874	-0.867619	0.651303	1	1	5595	tags=24%, list=27%, signal=32%
WU_APOPTOSIS_BY_CDKN1A_VIA_TP53	WU_APOPTOSIS_BY_CDKN1A_VIA_TP53		53	-0.36986	-0.866356	0.599174	1	1	6882	tags=47%, list=34%, signal=71%
KEGG_CYSTEINE_AND_METHIONINE_METABOLISM	KEGG_CYSTEINE_AND_METHIONINE_METABOLISM		34	-0.27477	-0.86476	0.652439	1	1	4814	tags=35%, list=23%, signal=46%
REACTOME_ACTIVATION_OF_BH3_ONLY_PROTEINS	REACTOME_ACTIVATION_OF_BH3_ONLY_PROTEINS		16	-0.28796	-0.864161	0.622568	1	1	5882	tags=31%, list=29%, signal=44%
ANDERSEN_LIVER_CANCER_KRT19_DN	ANDERSEN_LIVER_CANCER_KRT19_DN		74	-0.275594	-0.863158	0.668737	1	1	4563	tags=30%, list=22%, signal=38%
JIANG_HYPOXIA_VIA_VHL	JIANG_HYPOXIA_VIA_VHL		33	-0.211321	-0.862622	0.625755	1	1	4868	tags=27%, list=24%, signal=36%
YAO_TEMPORAL_RESPONSE_TO_PROGESTERONE_CLUSTER_4	YAO_TEMPORAL_RESPONSE_TO_PROGESTERONE_CLUSTER_4		15	-0.357617	-0.861854	0.655914	1	1	6272	tags=60%, list=31%, signal=86%
PID_AR_NONGENOMIC_PATHWAY	PID_AR_NONGENOMIC_PATHWAY		31	-0.244527	-0.861558	0.643863	1	1	1713	tags=13%, list=8%, signal=14%
WANG_CISPLATIN_RESPONSE_AND_XPC_UP	WANG_CISPLATIN_RESPONSE_AND_XPC_UP		195	-0.221693	-0.860566	0.713996	1	1	6015	tags=37%, list=29%, signal=52%
PID_FANCONI_PATHWAY	PID_FANCONI_PATHWAY		46	-0.302494	-0.860124	0.589958	1	1	3175	tags=24%, list=15%, signal=28%
ACEVEDO_LIVER_TUMOR_VS_NORMAL_ADJACENT_TISSUE_DN	ACEVEDO_LIVER_TUMOR_VS_NORMAL_ADJACENT_TISSUE_DN		266	-0.236188	-0.86012	0.692771	1	1	3589	tags=21%, list=18%, signal=26%
NAKAMURA_CANCER_MICROENVIRONMENT_DN	NAKAMURA_CANCER_MICROENVIRONMENT_DN		46	-0.326057	-0.859752	0.60166	1	1	5021	tags=41%, list=24%, signal=55%
ZWANG_DOWN_BY_2ND_EGF_PULSE	ZWANG_DOWN_BY_2ND_EGF_PULSE		252	-0.224311	-0.85761	0.693837	1	1	5850	tags=32%, list=29%, signal=44%
TURASHVILI_BREAST_DUCTAL_CARCINOMA_VS_LOBULAR_NORMAL_DN	TURASHVILI_BREAST_DUCTAL_CARCINOMA_VS_LOBULAR_NORMAL_DN		67	-0.375486	-0.857441	0.622351	1	1	3513	tags=37%, list=17%, signal=45%
WANG_BARRETTS_ESOPHAGUS_DN	WANG_BARRETTS_ESOPHAGUS_DN		25	-0.32189	-0.856727	0.646718	1	1	4527	tags=36%, list=22%, signal=46%
ZHENG_RESPONSE_TO_ARSENITE_UP	ZHENG_RESPONSE_TO_ARSENITE_UP		18	-0.353938	-0.856358	0.641975	1	1	4048	tags=39%, list=20%, signal=48%
COLLER_MYC_TARGETS_UP	COLLER_MYC_TARGETS_UP		24	-0.309381	-0.853667	0.587002	1	1	5644	tags=42%, list=28%, signal=57%
ASTIER_INTEGRIN_SIGNALING	ASTIER_INTEGRIN_SIGNALING		58	-0.239467	-0.852825	0.650602	1	1	2314	tags=12%, list=11%, signal=14%
REACTOME_REGULATION_OF_BETA_CELL_DEVELOPMENT	REACTOME_REGULATION_OF_BETA_CELL_DEVELOPMENT		28	-0.326998	-0.852234	0.700413	1	1	2779	tags=25%, list=14%, signal=29%
WEBER_METHYLATED_HCP_IN_SPERM_DN	WEBER_METHYLATED_HCP_IN_SPERM_DN		27	-0.331562	-0.851655	0.761811	1	1	5752	tags=48%, list=28%, signal=67%
FARMER_BREAST_CANCER_CLUSTER_2	FARMER_BREAST_CANCER_CLUSTER_2		33	-0.456171	-0.850881	0.665975	1	1	6965	tags=52%, list=34%, signal=78%
SCIBETTA_KDM5B_TARGETS_UP	SCIBETTA_KDM5B_TARGETS_UP		19	-0.247747	-0.850303	0.616352	1	1	5228	tags=32%, list=25%, signal=42%
DARWICHE_SQUAMOUS_CELL_CARCINOMA_DN	DARWICHE_SQUAMOUS_CELL_CARCINOMA_DN		171	-0.210008	-0.849523	0.73617	1	1	4120	tags=22%, list=20%, signal=28%
OUELLET_OVARIAN_CANCER_INVASIVE_VS_LMP_UP	OUELLET_OVARIAN_CANCER_INVASIVE_VS_LMP_UP		114	-0.221413	-0.849173	0.578411	1	1	7263	tags=43%, list=35%, signal=66%
KONG_E2F3_TARGETS	KONG_E2F3_TARGETS		96	-0.363342	-0.849103	0.610656	1	1	7028	tags=61%, list=34%, signal=93%
SCHLOSSER_MYC_TARGETS_AND_SERUM_RESPONSE_DN	SCHLOSSER_MYC_TARGETS_AND_SERUM_RESPONSE_DN		47	-0.2649	-0.848977	0.56701	1	1	7316	tags=36%, list=36%, signal=56%
IVANOVA_HEMATOPOIESIS_INTERMEDIATE_PROGENITOR	IVANOVA_HEMATOPOIESIS_INTERMEDIATE_PROGENITOR		145	-0.150849	-0.847033	0.701219	1	1	6466	tags=34%, list=32%, signal=50%
SCHUHMACHER_MYC_TARGETS_UP	SCHUHMACHER_MYC_TARGETS_UP		78	-0.237627	-0.846823	0.570833	1	1	6644	tags=40%, list=32%, signal=59%
BURTON_ADIPOGENESIS_3	BURTON_ADIPOGENESIS_3		101	-0.327164	-0.846381	0.59751	1	1	5836	tags=49%, list=28%, signal=67%
OUELLET_CULTURED_OVARIAN_CANCER_INVASIVE_VS_LMP_UP	OUELLET_CULTURED_OVARIAN_CANCER_INVASIVE_VS_LMP_UP		68	-0.209789	-0.845192	0.669404	1	1	4814	tags=25%, list=23%, signal=33%
GAZDA_DIAMOND_BLACKFAN_ANEMIA_ERYTHROID_DN	GAZDA_DIAMOND_BLACKFAN_ANEMIA_ERYTHROID_DN		471	-0.14692	-0.845155	0.846	1	1	3224	tags=14%, list=16%, signal=17%
REACTOME_POTASSIUM_CHANNELS	REACTOME_POTASSIUM_CHANNELS		98	-0.304961	-0.844705	0.747059	1	1	1937	tags=27%, list=9%, signal=29%
LANDIS_ERBB2_BREAST_TUMORS_65_UP	LANDIS_ERBB2_BREAST_TUMORS_65_UP		22	-0.249034	-0.844574	0.621118	1	1	904	tags=9%, list=4%, signal=10%
REACTOME_CHROMOSOME_MAINTENANCE	REACTOME_CHROMOSOME_MAINTENANCE		114	-0.311909	-0.84007	0.662551	1	1	5948	tags=43%, list=29%, signal=60%
REACTOME_GLYCOLYSIS	REACTOME_GLYCOLYSIS		27	-0.286847	-0.838721	0.650406	1	1	4774	tags=30%, list=23%, signal=39%
DELPUECH_FOXO3_TARGETS_DN	DELPUECH_FOXO3_TARGETS_DN		40	-0.274671	-0.838411	0.60334	1	1	6965	tags=43%, list=34%, signal=64%
REACTOME_INTERACTIONS_OF_VPR_WITH_HOST_CELLULAR_PROTEINS	REACTOME_INTERACTIONS_OF_VPR_WITH_HOST_CELLULAR_PROTEINS		32	-0.246112	-0.836644	0.636929	1	1	6784	tags=31%, list=33%, signal=47%
GRAHAM_CML_DIVIDING_VS_NORMAL_QUIESCENT_UP	GRAHAM_CML_DIVIDING_VS_NORMAL_QUIESCENT_UP		180	-0.29745	-0.836127	0.602851	1	1	5186	tags=41%, list=25%, signal=55%
MOOTHA_GLYCOLYSIS	MOOTHA_GLYCOLYSIS		21	-0.300291	-0.83535	0.692898	1	1	5009	tags=33%, list=24%, signal=44%
ROPERO_HDAC2_TARGETS	ROPERO_HDAC2_TARGETS		107	-0.239531	-0.834101	0.775967	1	1	2372	tags=20%, list=12%, signal=22%
REACTOME_BILE_ACID_AND_BILE_SALT_METABOLISM	REACTOME_BILE_ACID_AND_BILE_SALT_METABOLISM		27	-0.324506	-0.833865	0.744511	1	1	4260	tags=33%, list=21%, signal=42%
BIOCARTA_ACH_PATHWAY	BIOCARTA_ACH_PATHWAY		16	-0.335868	-0.833207	0.668024	1	1	625	tags=13%, list=3%, signal=13%
REACTOME_AQUAPORIN_MEDIATED_TRANSPORT	REACTOME_AQUAPORIN_MEDIATED_TRANSPORT		50	-0.268499	-0.832794	0.754	1	1	1803	tags=20%, list=9%, signal=22%
AGUIRRE_PANCREATIC_CANCER_COPY_NUMBER_UP	AGUIRRE_PANCREATIC_CANCER_COPY_NUMBER_UP		293	-0.157647	-0.832198	0.649193	1	1	7295	tags=40%, list=36%, signal=61%
REACTOME_RIP_MEDIATED_NFKB_ACTIVATION_VIA_DAI	REACTOME_RIP_MEDIATED_NFKB_ACTIVATION_VIA_DAI		18	-0.33292	-0.831193	0.64786	1	1	1553	tags=17%, list=8%, signal=18%
NAKAYAMA_SOFT_TISSUE_TUMORS_PCA1_DN	NAKAYAMA_SOFT_TISSUE_TUMORS_PCA1_DN		74	-0.312939	-0.829602	0.705653	1	1	3513	tags=36%, list=17%, signal=44%
HOSHIDA_LIVER_CANCER_LATE_RECURRENCE_DN	HOSHIDA_LIVER_CANCER_LATE_RECURRENCE_DN		69	-0.258394	-0.828659	0.781377	1	1	3495	tags=29%, list=17%, signal=35%
WATANABE_COLON_CANCER_MSI_VS_MSS_UP	WATANABE_COLON_CANCER_MSI_VS_MSS_UP		27	-0.29759	-0.827133	0.764706	1	1	2644	tags=26%, list=13%, signal=30%
LIN_APC_TARGETS	LIN_APC_TARGETS		76	-0.204222	-0.826986	0.630165	1	1	8328	tags=51%, list=41%, signal=86%
PID_ATR_PATHWAY	PID_ATR_PATHWAY		39	-0.30751	-0.826506	0.625259	1	1	5836	tags=36%, list=28%, signal=50%
REACTOME_FANCONI_ANEMIA_PATHWAY	REACTOME_FANCONI_ANEMIA_PATHWAY		21	-0.342372	-0.825308	0.656118	1	1	4420	tags=33%, list=22%, signal=42%
WANG_LSD1_TARGETS_DN	WANG_LSD1_TARGETS_DN		39	-0.311415	-0.824701	0.726908	1	1	3930	tags=28%, list=19%, signal=35%
PID_TELOMERASE_PATHWAY	PID_TELOMERASE_PATHWAY		68	-0.178147	-0.824302	0.674518	1	1	2196	tags=12%, list=11%, signal=13%
HONMA_DOCETAXEL_RESISTANCE	HONMA_DOCETAXEL_RESISTANCE		34	-0.240163	-0.823978	0.600398	1	1	7456	tags=53%, list=36%, signal=83%
MCBRYAN_PUBERTAL_BREAST_3_4WK_DN	MCBRYAN_PUBERTAL_BREAST_3_4WK_DN		35	-0.284067	-0.820384	0.716	1	1	4051	tags=26%, list=20%, signal=32%
PID_INSULIN_GLUCOSE_PATHWAY	PID_INSULIN_GLUCOSE_PATHWAY		26	-0.218964	-0.820367	0.700197	1	1	2194	tags=12%, list=11%, signal=13%
HOFMANN_MYELODYSPLASTIC_SYNDROM_LOW_RISK_DN	HOFMANN_MYELODYSPLASTIC_SYNDROM_LOW_RISK_DN		30	-0.282395	-0.819745	0.671343	1	1	4027	tags=30%, list=20%, signal=37%
DE_YY1_TARGETS_UP	DE_YY1_TARGETS_UP		19	-0.34116	-0.81958	0.758823	1	1	3038	tags=26%, list=15%, signal=31%
INGA_TP53_TARGETS	INGA_TP53_TARGETS		17	-0.30116	-0.819447	0.66348	1	1	1115	tags=12%, list=5%, signal=12%
LI_WILMS_TUMOR_ANAPLASTIC_UP	LI_WILMS_TUMOR_ANAPLASTIC_UP		19	-0.411152	-0.818367	0.675732	1	1	5640	tags=47%, list=28%, signal=65%
HAMAI_APOPTOSIS_VIA_TRAIL_DN	HAMAI_APOPTOSIS_VIA_TRAIL_DN		181	-0.246016	-0.81818	0.735178	1	1	2561	tags=20%, list=12%, signal=23%
BOYAULT_LIVER_CANCER_SUBCLASS_G123_DN	BOYAULT_LIVER_CANCER_SUBCLASS_G123_DN		51	-0.26789	-0.817426	0.751984	1	1	3371	tags=27%, list=16%, signal=33%
KYNG_RESPONSE_TO_H2O2	KYNG_RESPONSE_TO_H2O2		71	-0.207806	-0.815817	0.699374	1	1	5822	tags=37%, list=28%, signal=51%
CUI_GLUCOSE_DEPRIVATION	CUI_GLUCOSE_DEPRIVATION		60	-0.220386	-0.814935	0.757261	1	1	6705	tags=42%, list=33%, signal=62%
GUTIERREZ_MULTIPLE_MYELOMA_UP	GUTIERREZ_MULTIPLE_MYELOMA_UP		35	-0.216446	-0.81478	0.641584	1	1	16073	tags=100%, list=78%, signal=462%
SATO_SILENCED_BY_METHYLATION_IN_PANCREATIC_CANCER_2	SATO_SILENCED_BY_METHYLATION_IN_PANCREATIC_CANCER_2		47	-0.302592	-0.814419	0.750973	1	1	2336	tags=26%, list=11%, signal=29%
MARCINIAK_ER_STRESS_RESPONSE_VIA_CHOP	MARCINIAK_ER_STRESS_RESPONSE_VIA_CHOP		25	-0.257131	-0.812527	0.703252	1	1	1770	tags=16%, list=9%, signal=17%
KAYO_CALORIE_RESTRICTION_MUSCLE_DN	KAYO_CALORIE_RESTRICTION_MUSCLE_DN		85	-0.210444	-0.81225	0.764826	1	1	5491	tags=32%, list=27%, signal=43%
KEGG_SELENOAMINO_ACID_METABOLISM	KEGG_SELENOAMINO_ACID_METABOLISM		26	-0.238873	-0.811752	0.732143	1	1	6076	tags=38%, list=30%, signal=55%
VANDESLUIS_COMMD1_TARGETS_GROUP_3_UP	VANDESLUIS_COMMD1_TARGETS_GROUP_3_UP		87	-0.239559	-0.811721	0.814453	1	1	2567	tags=17%, list=13%, signal=20%
HUNSBERGER_EXERCISE_REGULATED_GENES	HUNSBERGER_EXERCISE_REGULATED_GENES		31	-0.295425	-0.8103	0.743271	1	1	3135	tags=26%, list=15%, signal=30%
REACTOME_REGULATION_OF_APOPTOSIS	REACTOME_REGULATION_OF_APOPTOSIS		56	-0.220157	-0.809971	0.626033	1	1	7969	tags=50%, list=39%, signal=82%
CHANG_CYCLING_GENES	CHANG_CYCLING_GENES		145	-0.338747	-0.808785	0.654167	1	1	5528	tags=46%, list=27%, signal=62%
REACTOME_SYNTHESIS_OF_PIPS_AT_THE_GOLGI_MEMBRANE	REACTOME_SYNTHESIS_OF_PIPS_AT_THE_GOLGI_MEMBRANE		17	-0.255972	-0.808006	0.693227	1	1	3289	tags=18%, list=16%, signal=21%
TERAO_AOX4_TARGETS_SKIN_UP	TERAO_AOX4_TARGETS_SKIN_UP		37	-0.197231	-0.807611	0.737452	1	1	4253	tags=24%, list=21%, signal=31%
DAZARD_UV_RESPONSE_CLUSTER_G28	DAZARD_UV_RESPONSE_CLUSTER_G28		19	-0.357642	-0.805859	0.69917	1	1	2645	tags=26%, list=13%, signal=30%
WEST_ADRENOCORTICAL_CARCINOMA_VS_ADENOMA_UP	WEST_ADRENOCORTICAL_CARCINOMA_VS_ADENOMA_UP		20	-0.306493	-0.804948	0.745059	1	1	6526	tags=60%, list=32%, signal=88%
PASINI_SUZ12_TARGETS_UP	PASINI_SUZ12_TARGETS_UP		111	-0.236479	-0.804866	0.852459	1	1	2120	tags=16%, list=10%, signal=18%
VECCHI_GASTRIC_CANCER_EARLY_UP	VECCHI_GASTRIC_CANCER_EARLY_UP		413	-0.252143	-0.803933	0.664609	1	1	6402	tags=42%, list=31%, signal=60%
IGLESIAS_E2F_TARGETS_DN	IGLESIAS_E2F_TARGETS_DN		15	-0.343814	-0.803789	0.771863	1	1	2143	tags=20%, list=10%, signal=22%
REACTOME_ADP_SIGNALLING_THROUGH_P2RY1	REACTOME_ADP_SIGNALLING_THROUGH_P2RY1		25	-0.28093	-0.803241	0.798781	1	1	1639	tags=20%, list=8%, signal=22%
MARKS_ACETYLATED_NON_HISTONE_PROTEINS	MARKS_ACETYLATED_NON_HISTONE_PROTEINS		15	-0.279212	-0.80207	0.735656	1	1	3636	tags=27%, list=18%, signal=32%
KEGG_OOCYTE_MEIOSIS	KEGG_OOCYTE_MEIOSIS		112	-0.210129	-0.80169	0.707317	1	1	2728	tags=15%, list=13%, signal=17%
REACTOME_VOLTAGE_GATED_POTASSIUM_CHANNELS	REACTOME_VOLTAGE_GATED_POTASSIUM_CHANNELS		43	-0.325239	-0.800252	0.780933	1	1	1937	tags=26%, list=9%, signal=28%
MIKKELSEN_ES_ICP_WITH_H3K27ME3	MIKKELSEN_ES_ICP_WITH_H3K27ME3		40	-0.315506	-0.800219	0.825651	1	1	3038	tags=33%, list=15%, signal=38%
REACTOME_OPIOID_SIGNALLING	REACTOME_OPIOID_SIGNALLING		77	-0.238404	-0.79929	0.7751	1	1	1639	tags=14%, list=8%, signal=15%
REACTOME_G0_AND_EARLY_G1	REACTOME_G0_AND_EARLY_G1		23	-0.357545	-0.799286	0.673684	1	1	5640	tags=48%, list=28%, signal=66%
SCIBETTA_KDM5B_TARGETS_DN	SCIBETTA_KDM5B_TARGETS_DN		78	-0.23569	-0.798272	0.678138	1	1	5233	tags=36%, list=26%, signal=48%
KAYO_AGING_MUSCLE_DN	KAYO_AGING_MUSCLE_DN		121	-0.160744	-0.797376	0.764579	1	1	7357	tags=43%, list=36%, signal=67%
LINDGREN_BLADDER_CANCER_CLUSTER_3_UP	LINDGREN_BLADDER_CANCER_CLUSTER_3_UP		320	-0.232687	-0.797222	0.65567	1	1	6706	tags=42%, list=33%, signal=61%
SUNG_METASTASIS_STROMA_DN	SUNG_METASTASIS_STROMA_DN		53	-0.268752	-0.796667	0.689938	1	1	3620	tags=28%, list=18%, signal=34%
DARWICHE_SKIN_TUMOR_PROMOTER_DN	DARWICHE_SKIN_TUMOR_PROMOTER_DN		177	-0.192374	-0.795705	0.86551	1	1	4120	tags=22%, list=20%, signal=27%
RICKMAN_HEAD_AND_NECK_CANCER_D	RICKMAN_HEAD_AND_NECK_CANCER_D		28	-0.366505	-0.795626	0.733202	1	1	2052	tags=29%, list=10%, signal=32%
SHEDDEN_LUNG_CANCER_GOOD_SURVIVAL_A12	SHEDDEN_LUNG_CANCER_GOOD_SURVIVAL_A12		284	-0.230068	-0.795249	0.781124	1	1	2752	tags=19%, list=13%, signal=22%
CHANG_CORE_SERUM_RESPONSE_UP	CHANG_CORE_SERUM_RESPONSE_UP		211	-0.192849	-0.794812	0.638037	1	1	6544	tags=39%, list=32%, signal=56%
WONG_PROTEASOME_GENE_MODULE	WONG_PROTEASOME_GENE_MODULE		49	-0.214031	-0.794116	0.622568	1	1	8808	tags=49%, list=43%, signal=86%
BOYAULT_LIVER_CANCER_SUBCLASS_G12_DN	BOYAULT_LIVER_CANCER_SUBCLASS_G12_DN		15	-0.353919	-0.793991	0.754527	1	1	3542	tags=27%, list=17%, signal=32%
PARK_HSC_MARKERS	PARK_HSC_MARKERS		43	-0.22909	-0.793577	0.698574	1	1	2247	tags=14%, list=11%, signal=16%
SHIPP_DLBCL_VS_FOLLICULAR_LYMPHOMA_UP	SHIPP_DLBCL_VS_FOLLICULAR_LYMPHOMA_UP		45	-0.281954	-0.79283	0.648033	1	1	8219	tags=49%, list=40%, signal=81%
PENG_GLUCOSE_DEPRIVATION_UP	PENG_GLUCOSE_DEPRIVATION_UP		46	-0.221578	-0.792684	0.770791	1	1	7668	tags=48%, list=37%, signal=76%
VILLANUEVA_LIVER_CANCER_KRT19_DN	VILLANUEVA_LIVER_CANCER_KRT19_DN		64	-0.247606	-0.792131	0.811594	1	1	3979	tags=27%, list=19%, signal=33%
REACTOME_TRANSPORT_OF_MATURE_TRANSCRIPT_TO_CYTOPLASM	REACTOME_TRANSPORT_OF_MATURE_TRANSCRIPT_TO_CYTOPLASM		44	-0.22998	-0.789972	0.660832	1	1	7453	tags=36%, list=36%, signal=57%
NGO_MALIGNANT_GLIOMA_1P_LOH	NGO_MALIGNANT_GLIOMA_1P_LOH		16	-0.273279	-0.786805	0.758691	1	1	4796	tags=25%, list=23%, signal=33%
PID_SYNDECAN_3_PATHWAY	PID_SYNDECAN_3_PATHWAY		17	-0.312453	-0.786247	0.729293	1	1	4390	tags=29%, list=21%, signal=37%
KEGG_PYRUVATE_METABOLISM	KEGG_PYRUVATE_METABOLISM		40	-0.21893	-0.78613	0.808795	1	1	7355	tags=43%, list=36%, signal=66%
FURUKAWA_DUSP6_TARGETS_PCI35_DN	FURUKAWA_DUSP6_TARGETS_PCI35_DN		69	-0.300466	-0.783823	0.663158	1	1	4892	tags=36%, list=24%, signal=47%
CHOW_RASSF1_TARGETS_UP	CHOW_RASSF1_TARGETS_UP		27	-0.220872	-0.783426	0.674089	1	1	6950	tags=44%, list=34%, signal=67%
REACTOME_STEROID_HORMONES	REACTOME_STEROID_HORMONES		29	-0.301047	-0.783259	0.866799	1	1	5297	tags=41%, list=26%, signal=56%
HUI_MAPK14_TARGETS_UP	HUI_MAPK14_TARGETS_UP		21	-0.32066	-0.782175	0.805274	1	1	840	tags=14%, list=4%, signal=15%
LAIHO_COLORECTAL_CANCER_SERRATED_DN	LAIHO_COLORECTAL_CANCER_SERRATED_DN		76	-0.167952	-0.781416	0.692153	1	1	5881	tags=26%, list=29%, signal=37%
WATTEL_AUTONOMOUS_THYROID_ADENOMA_UP	WATTEL_AUTONOMOUS_THYROID_ADENOMA_UP		71	-0.240245	-0.781295	0.925466	1	1	2690	tags=24%, list=13%, signal=27%
BIOCARTA_CELLCYCLE_PATHWAY	BIOCARTA_CELLCYCLE_PATHWAY		23	-0.296262	-0.78129	0.69375	1	1	3328	tags=30%, list=16%, signal=36%
REACTOME_MITOTIC_PROMETAPHASE	REACTOME_MITOTIC_PROMETAPHASE		86	-0.296171	-0.780804	0.649462	1	1	6011	tags=33%, list=29%, signal=46%
BURTON_ADIPOGENESIS_6	BURTON_ADIPOGENESIS_6		189	-0.196242	-0.780416	0.735967	1	1	6883	tags=39%, list=34%, signal=58%
MARKEY_RB1_ACUTE_LOF_UP	MARKEY_RB1_ACUTE_LOF_UP		230	-0.228965	-0.779065	0.647679	1	1	5799	tags=36%, list=28%, signal=50%
BIOCARTA_ATRBRCA_PATHWAY	BIOCARTA_ATRBRCA_PATHWAY		21	-0.290372	-0.779015	0.689508	1	1	3907	tags=24%, list=19%, signal=29%
FERREIRA_EWINGS_SARCOMA_UNSTABLE_VS_STABLE_UP	FERREIRA_EWINGS_SARCOMA_UNSTABLE_VS_STABLE_UP		165	-0.2545	-0.778751	0.645492	1	1	6510	tags=42%, list=32%, signal=62%
REACTOME_NUCLEAR_RECEPTOR_TRANSCRIPTION_PATHWAY	REACTOME_NUCLEAR_RECEPTOR_TRANSCRIPTION_PATHWAY		47	-0.266647	-0.778599	0.812261	1	1	1391	tags=15%, list=7%, signal=16%
REACTOME_LIGAND_GATED_ION_CHANNEL_TRANSPORT	REACTOME_LIGAND_GATED_ION_CHANNEL_TRANSPORT		21	-0.341026	-0.777961	0.816206	1	1	1137	tags=24%, list=6%, signal=25%
KEGG_TYROSINE_METABOLISM	KEGG_TYROSINE_METABOLISM		42	-0.290035	-0.77676	0.775258	1	1	4427	tags=33%, list=22%, signal=42%
BOHN_PRIMARY_IMMUNODEFICIENCY_SYNDROM_UP	BOHN_PRIMARY_IMMUNODEFICIENCY_SYNDROM_UP		46	-0.254265	-0.775173	0.695464	1	1	4568	tags=28%, list=22%, signal=36%
TOYOTA_TARGETS_OF_MIR34B_AND_MIR34C	TOYOTA_TARGETS_OF_MIR34B_AND_MIR34C		429	-0.200464	-0.773858	0.655172	1	1	5844	tags=29%, list=29%, signal=40%
PID_P75_NTR_PATHWAY	PID_P75_NTR_PATHWAY		69	-0.183483	-0.77249	0.800781	1	1	2288	tags=12%, list=11%, signal=13%
BILANGES_RAPAMYCIN_SENSITIVE_GENES	BILANGES_RAPAMYCIN_SENSITIVE_GENES		38	-0.186906	-0.770382	0.765714	1	1	5568	tags=32%, list=27%, signal=43%
MIKKELSEN_ES_LCP_WITH_H3K4ME3	MIKKELSEN_ES_LCP_WITH_H3K4ME3		132	-0.252831	-0.769813	0.864542	1	1	3302	tags=23%, list=16%, signal=28%
NIELSEN_SCHWANNOMA_UP	NIELSEN_SCHWANNOMA_UP		16	-0.334595	-0.76939	0.825301	1	1	1063	tags=19%, list=5%, signal=20%
NING_CHRONIC_OBSTRUCTIVE_PULMONARY_DISEASE_UP	NING_CHRONIC_OBSTRUCTIVE_PULMONARY_DISEASE_UP		153	-0.191876	-0.76782	0.716832	1	1	5179	tags=34%, list=25%, signal=45%
LEE_LIVER_CANCER_SURVIVAL_UP	LEE_LIVER_CANCER_SURVIVAL_UP		179	-0.233831	-0.766639	0.944334	1	1	4563	tags=34%, list=22%, signal=43%
MADAN_DPPA4_TARGETS	MADAN_DPPA4_TARGETS		45	-0.285077	-0.766514	0.865497	1	1	3427	tags=22%, list=17%, signal=27%
REACTOME_MEIOSIS	REACTOME_MEIOSIS		107	-0.303752	-0.766204	0.708911	1	1	2220	tags=21%, list=11%, signal=23%
XU_HGF_TARGETS_INDUCED_BY_AKT1_48HR_DN	XU_HGF_TARGETS_INDUCED_BY_AKT1_48HR_DN		26	-0.289758	-0.765753	0.713402	1	1	4211	tags=27%, list=21%, signal=34%
REACTOME_INHIBITION_OF_THE_PROTEOLYTIC_ACTIVITY_OF_APC_C_REQUIRED_FOR_THE_ONSET_OF_ANAPHASE_BY_MITOTIC_SPINDLE_CHECKPOINT_COMPONENTS	REACTOME_INHIBITION_OF_THE_PROTEOLYTIC_ACTIVITY_OF_APC_C_REQUIRED_FOR_THE_ONSET_OF_ANAPHASE_BY_MITOTIC_SPINDLE_CHECKPOINT_COMPONENTS		18	-0.283407	-0.764375	0.68	1	1	1600	tags=11%, list=8%, signal=12%
MEISSNER_NPC_HCP_WITH_H3K27ME3	MEISSNER_NPC_HCP_WITH_H3K27ME3		78	-0.283253	-0.763578	0.896414	1	1	2779	tags=29%, list=14%, signal=34%
BOYLAN_MULTIPLE_MYELOMA_C_UP	BOYLAN_MULTIPLE_MYELOMA_C_UP		46	-0.229222	-0.761815	0.799172	1	1	3107	tags=24%, list=15%, signal=28%
CHARAFE_BREAST_CANCER_BASAL_VS_MESENCHYMAL_UP	CHARAFE_BREAST_CANCER_BASAL_VS_MESENCHYMAL_UP		121	-0.249588	-0.761785	0.751503	1	1	5718	tags=36%, list=28%, signal=50%
JAZAERI_BREAST_CANCER_BRCA1_VS_BRCA2_UP	JAZAERI_BREAST_CANCER_BRCA1_VS_BRCA2_UP		49	-0.167888	-0.759424	0.71281	1	1	5696	tags=27%, list=28%, signal=37%
SMITH_LIVER_CANCER	SMITH_LIVER_CANCER		44	-0.224579	-0.75897	0.764092	1	1	2571	tags=16%, list=13%, signal=18%
SMID_BREAST_CANCER_RELAPSE_IN_LUNG_UP	SMID_BREAST_CANCER_RELAPSE_IN_LUNG_UP		21	-0.370484	-0.758145	0.724138	1	1	3494	tags=48%, list=17%, signal=57%
SMID_BREAST_CANCER_RELAPSE_IN_PLEURA_DN	SMID_BREAST_CANCER_RELAPSE_IN_PLEURA_DN		25	-0.369462	-0.757281	0.784274	1	1	2734	tags=28%, list=13%, signal=32%
KORKOLA_EMBRYONAL_CARCINOMA_UP	KORKOLA_EMBRYONAL_CARCINOMA_UP		40	-0.244994	-0.756545	0.711198	1	1	4966	tags=38%, list=24%, signal=49%
MIKKELSEN_MEF_ICP_WITH_H3K27ME3	MIKKELSEN_MEF_ICP_WITH_H3K27ME3		198	-0.255902	-0.755476	0.974952	1	1	4326	tags=32%, list=21%, signal=41%
LUND_SILENCED_BY_METHYLATION	LUND_SILENCED_BY_METHYLATION		16	-0.229546	-0.753908	0.762846	1	1	5756	tags=44%, list=28%, signal=61%
VISALA_AGING_LYMPHOCYTE_DN	VISALA_AGING_LYMPHOCYTE_DN		19	-0.295426	-0.751994	0.760915	1	1	1386	tags=16%, list=7%, signal=17%
RICKMAN_HEAD_AND_NECK_CANCER_E	RICKMAN_HEAD_AND_NECK_CANCER_E		85	-0.319281	-0.751454	0.819086	1	1	3834	tags=36%, list=19%, signal=45%
REACTOME_TELOMERE_MAINTENANCE	REACTOME_TELOMERE_MAINTENANCE		73	-0.315008	-0.75117	0.705179	1	1	6067	tags=44%, list=30%, signal=62%
KRIGE_AMINO_ACID_DEPRIVATION	KRIGE_AMINO_ACID_DEPRIVATION		29	-0.281687	-0.751107	0.753535	1	1	6221	tags=38%, list=30%, signal=54%
DARWICHE_PAPILLOMA_PROGRESSION_RISK	DARWICHE_PAPILLOMA_PROGRESSION_RISK		72	-0.22241	-0.750337	0.93595	1	1	3335	tags=21%, list=16%, signal=25%
NIKOLSKY_BREAST_CANCER_11Q12_Q14_AMPLICON	NIKOLSKY_BREAST_CANCER_11Q12_Q14_AMPLICON		150	-0.220925	-0.749979	0.826271	1	1	6371	tags=41%, list=31%, signal=60%
PID_P53_REGULATION_PATHWAY	PID_P53_REGULATION_PATHWAY		58	-0.14494	-0.748824	0.777778	1	1	6592	tags=28%, list=32%, signal=41%
GENTILE_RESPONSE_CLUSTER_D3	GENTILE_RESPONSE_CLUSTER_D3		60	-0.193681	-0.747142	0.696466	1	1	6336	tags=30%, list=31%, signal=43%
MARTINEZ_RESPONSE_TO_TRABECTEDIN_UP	MARTINEZ_RESPONSE_TO_TRABECTEDIN_UP		70	-0.18779	-0.745611	0.746124	1	1	5705	tags=34%, list=28%, signal=47%
STEINER_ERYTHROCYTE_MEMBRANE_GENES	STEINER_ERYTHROCYTE_MEMBRANE_GENES		15	-0.33423	-0.745223	0.772257	1	1	1900	tags=20%, list=9%, signal=22%
WHITFIELD_CELL_CYCLE_G2	WHITFIELD_CELL_CYCLE_G2		173	-0.216848	-0.743369	0.673554	1	1	4538	tags=26%, list=22%, signal=33%
ZUCCHI_METASTASIS_DN	ZUCCHI_METASTASIS_DN		43	-0.264543	-0.743279	0.7463	1	1	6995	tags=44%, list=34%, signal=67%
TOOKER_GEMCITABINE_RESISTANCE_UP	TOOKER_GEMCITABINE_RESISTANCE_UP		78	-0.178058	-0.742811	0.766	1	1	6024	tags=29%, list=29%, signal=42%
LIANG_HEMATOPOIESIS_STEM_CELL_NUMBER_QTL	LIANG_HEMATOPOIESIS_STEM_CELL_NUMBER_QTL		16	-0.284079	-0.742677	0.809829	1	1	790	tags=13%, list=4%, signal=13%
REACTOME_MRNA_CAPPING	REACTOME_MRNA_CAPPING		29	-0.198844	-0.742451	0.747917	1	1	6822	tags=38%, list=33%, signal=57%
GRADE_COLON_VS_RECTAL_CANCER_DN	GRADE_COLON_VS_RECTAL_CANCER_DN		56	-0.204993	-0.741477	0.847059	1	1	3346	tags=18%, list=16%, signal=21%
REACTOME_LOSS_OF_NLP_FROM_MITOTIC_CENTROSOMES	REACTOME_LOSS_OF_NLP_FROM_MITOTIC_CENTROSOMES		52	-0.181819	-0.739959	0.690763	1	1	7476	tags=38%, list=36%, signal=60%
SUMI_HNF4A_TARGETS	SUMI_HNF4A_TARGETS		32	-0.282961	-0.739703	0.916168	1	1	5006	tags=44%, list=24%, signal=58%
DUTERTRE_ESTRADIOL_RESPONSE_24HR_UP	DUTERTRE_ESTRADIOL_RESPONSE_24HR_UP		317	-0.271812	-0.739577	0.703252	1	1	5916	tags=41%, list=29%, signal=56%
WANG_METASTASIS_OF_BREAST_CANCER	WANG_METASTASIS_OF_BREAST_CANCER		15	-0.299629	-0.739413	0.831014	1	1	5351	tags=47%, list=26%, signal=63%
REACTOME_MEIOTIC_SYNAPSIS	REACTOME_MEIOTIC_SYNAPSIS		69	-0.306014	-0.739393	0.743689	1	1	2220	tags=20%, list=11%, signal=23%
COLLIS_PRKDC_SUBSTRATES	COLLIS_PRKDC_SUBSTRATES		19	-0.197339	-0.738986	0.814103	1	1	5690	tags=26%, list=28%, signal=36%
CHEOK_RESPONSE_TO_MERCAPTOPURINE_DN	CHEOK_RESPONSE_TO_MERCAPTOPURINE_DN		21	-0.259563	-0.737705	0.812627	1	1	3848	tags=24%, list=19%, signal=29%
BIOCARTA_EIF_PATHWAY	BIOCARTA_EIF_PATHWAY		16	-0.236845	-0.736882	0.88866	1	1	15651	tags=100%, list=76%, signal=422%
PARK_HSC_AND_MULTIPOTENT_PROGENITORS	PARK_HSC_AND_MULTIPOTENT_PROGENITORS		48	-0.152738	-0.736281	0.78481	1	1	5987	tags=29%, list=29%, signal=41%
SHIPP_DLBCL_CURED_VS_FATAL_DN	SHIPP_DLBCL_CURED_VS_FATAL_DN		44	-0.20834	-0.733344	0.809426	1	1	5200	tags=27%, list=25%, signal=36%
KEGG_P53_SIGNALING_PATHWAY	KEGG_P53_SIGNALING_PATHWAY		67	-0.196223	-0.732338	0.859794	1	1	1191	tags=10%, list=6%, signal=11%
MATZUK_SPERMATOCYTE	MATZUK_SPERMATOCYTE		71	-0.22534	-0.731068	0.871227	1	1	4474	tags=30%, list=22%, signal=38%
KEGG_AMYOTROPHIC_LATERAL_SCLEROSIS_ALS	KEGG_AMYOTROPHIC_LATERAL_SCLEROSIS_ALS		53	-0.212518	-0.730621	0.866795	1	1	5646	tags=28%, list=28%, signal=39%
MATTIOLI_MULTIPLE_MYELOMA_SUBGROUPS	MATTIOLI_MULTIPLE_MYELOMA_SUBGROUPS		15	-0.331643	-0.730096	0.731707	1	1	2714	tags=20%, list=13%, signal=23%
PID_RB_1PATHWAY	PID_RB_1PATHWAY		65	-0.192194	-0.727426	0.843813	1	1	6085	tags=38%, list=30%, signal=55%
NIKOLSKY_BREAST_CANCER_16P13_AMPLICON	NIKOLSKY_BREAST_CANCER_16P13_AMPLICON		120	-0.269067	-0.726278	0.738241	1	1	2187	tags=14%, list=11%, signal=16%
SU_TESTIS	SU_TESTIS		75	-0.242275	-0.725991	0.830957	1	1	5391	tags=36%, list=26%, signal=49%
CAFFAREL_RESPONSE_TO_THC_DN	CAFFAREL_RESPONSE_TO_THC_DN		30	-0.237792	-0.720428	0.72973	1	1	8170	tags=53%, list=40%, signal=89%
ABRAMSON_INTERACT_WITH_AIRE	ABRAMSON_INTERACT_WITH_AIRE		42	-0.219501	-0.720247	0.745935	1	1	6674	tags=31%, list=33%, signal=46%
WANG_METASTASIS_OF_BREAST_CANCER_ESR1_UP	WANG_METASTASIS_OF_BREAST_CANCER_ESR1_UP		22	-0.302979	-0.719629	0.738947	1	1	8306	tags=55%, list=41%, signal=92%
WATANABE_COLON_CANCER_MSI_VS_MSS_DN	WATANABE_COLON_CANCER_MSI_VS_MSS_DN		77	-0.228225	-0.718517	0.949612	1	1	2351	tags=18%, list=11%, signal=20%
LEE_LIVER_CANCER_MYC_TGFA_UP	LEE_LIVER_CANCER_MYC_TGFA_UP		60	-0.222395	-0.717592	0.881874	1	1	4537	tags=27%, list=22%, signal=34%
REACTOME_PHOSPHORYLATION_OF_THE_APC_C	REACTOME_PHOSPHORYLATION_OF_THE_APC_C		17	-0.265209	-0.717466	0.734864	1	1	7171	tags=41%, list=35%, signal=63%
BRACHAT_RESPONSE_TO_CISPLATIN	BRACHAT_RESPONSE_TO_CISPLATIN		21	-0.228662	-0.716864	0.791103	1	1	3850	tags=24%, list=19%, signal=29%
REACTOME_TRAF6_MEDIATED_IRF7_ACTIVATION	REACTOME_TRAF6_MEDIATED_IRF7_ACTIVATION		30	-0.255168	-0.716417	0.788	1	1	3257	tags=17%, list=16%, signal=20%
KEGG_GALACTOSE_METABOLISM	KEGG_GALACTOSE_METABOLISM		26	-0.232469	-0.716159	0.864919	1	1	2652	tags=15%, list=13%, signal=18%
REACTOME_INTRINSIC_PATHWAY_FOR_APOPTOSIS	REACTOME_INTRINSIC_PATHWAY_FOR_APOPTOSIS		29	-0.183657	-0.713861	0.823417	1	1	16743	tags=100%, list=82%, signal=545%
WINNEPENNINCKX_MELANOMA_METASTASIS_UP	WINNEPENNINCKX_MELANOMA_METASTASIS_UP		159	-0.263791	-0.713707	0.672802	1	1	6389	tags=42%, list=31%, signal=60%
ZHOU_TNF_SIGNALING_4HR	ZHOU_TNF_SIGNALING_4HR		53	-0.180042	-0.713589	0.784553	1	1	6325	tags=36%, list=31%, signal=52%
CHEMNITZ_RESPONSE_TO_PROSTAGLANDIN_E2_UP	CHEMNITZ_RESPONSE_TO_PROSTAGLANDIN_E2_UP		140	-0.243006	-0.712566	0.713402	1	1	4268	tags=31%, list=21%, signal=39%
BLUM_RESPONSE_TO_SALIRASIB_DN	BLUM_RESPONSE_TO_SALIRASIB_DN		330	-0.200361	-0.712407	0.737844	1	1	5238	tags=33%, list=26%, signal=43%
VERNELL_RETINOBLASTOMA_PATHWAY_UP	VERNELL_RETINOBLASTOMA_PATHWAY_UP		69	-0.270309	-0.711678	0.712185	1	1	5622	tags=42%, list=27%, signal=58%
NIKOLSKY_BREAST_CANCER_8P12_P11_AMPLICON	NIKOLSKY_BREAST_CANCER_8P12_P11_AMPLICON		54	-0.268262	-0.711391	0.758197	1	1	1900	tags=17%, list=9%, signal=18%
REACTOME_INTRINSIC_PATHWAY	REACTOME_INTRINSIC_PATHWAY		16	-0.298581	-0.711328	0.870518	1	1	1989	tags=25%, list=10%, signal=28%
CADWELL_ATG16L1_TARGETS_DN	CADWELL_ATG16L1_TARGETS_DN		67	-0.192777	-0.709619	0.925253	1	1	3396	tags=18%, list=17%, signal=21%
LE_EGR2_TARGETS_UP	LE_EGR2_TARGETS_UP		107	-0.240582	-0.707801	0.733888	1	1	5799	tags=40%, list=28%, signal=56%
HOUSTIS_ROS	HOUSTIS_ROS		35	-0.221971	-0.707414	0.847082	1	1	4563	tags=26%, list=22%, signal=33%
LEE_EARLY_T_LYMPHOCYTE_UP	LEE_EARLY_T_LYMPHOCYTE_UP		100	-0.305127	-0.7072	0.727835	1	1	6965	tags=53%, list=34%, signal=80%
LANDIS_BREAST_CANCER_PROGRESSION_UP	LANDIS_BREAST_CANCER_PROGRESSION_UP		44	-0.19197	-0.704509	0.867562	1	1	2294	tags=11%, list=11%, signal=13%
KOKKINAKIS_METHIONINE_DEPRIVATION_48HR_DN	KOKKINAKIS_METHIONINE_DEPRIVATION_48HR_DN		64	-0.177057	-0.703602	0.903158	1	1	5863	tags=33%, list=29%, signal=46%
PURBEY_TARGETS_OF_CTBP1_AND_SATB1_UP	PURBEY_TARGETS_OF_CTBP1_AND_SATB1_UP		81	-0.172317	-0.703314	0.916667	1	1	6530	tags=38%, list=32%, signal=56%
PID_DNA_PK_PATHWAY	PID_DNA_PK_PATHWAY		16	-0.216647	-0.701534	0.807377	1	1	7096	tags=50%, list=35%, signal=76%
REACTOME_PYRIMIDINE_METABOLISM	REACTOME_PYRIMIDINE_METABOLISM		24	-0.238765	-0.701374	0.866944	1	1	5036	tags=42%, list=25%, signal=55%
LI_CYTIDINE_ANALOG_PATHWAY	LI_CYTIDINE_ANALOG_PATHWAY		17	-0.260096	-0.70094	0.885892	1	1	3390	tags=24%, list=17%, signal=28%
LI_LUNG_CANCER	LI_LUNG_CANCER		41	-0.232059	-0.700875	0.780992	1	1	5408	tags=34%, list=26%, signal=46%
RHODES_CANCER_META_SIGNATURE	RHODES_CANCER_META_SIGNATURE		64	-0.218062	-0.700834	0.691824	1	1	6437	tags=41%, list=31%, signal=59%
GARGALOVIC_RESPONSE_TO_OXIDIZED_PHOSPHOLIPIDS_GREEN_DN	GARGALOVIC_RESPONSE_TO_OXIDIZED_PHOSPHOLIPIDS_GREEN_DN		24	-0.195924	-0.70082	0.834356	1	1	1675	tags=13%, list=8%, signal=14%
TURASHVILI_BREAST_LOBULAR_CARCINOMA_VS_DUCTAL_NORMAL_DN	TURASHVILI_BREAST_LOBULAR_CARCINOMA_VS_DUCTAL_NORMAL_DN		90	-0.278469	-0.700278	0.830709	1	1	2773	tags=24%, list=14%, signal=28%
WANG_BARRETTS_ESOPHAGUS_AND_ESOPHAGUS_CANCER_DN	WANG_BARRETTS_ESOPHAGUS_AND_ESOPHAGUS_CANCER_DN		37	-0.279935	-0.699098	0.848485	1	1	6246	tags=43%, list=30%, signal=62%
BIOCARTA_EPO_PATHWAY	BIOCARTA_EPO_PATHWAY		19	-0.208563	-0.698776	0.828571	1	1	16231	tags=100%, list=79%, signal=480%
HEIDENBLAD_AMPLICON_12P11_12_UP	HEIDENBLAD_AMPLICON_12P11_12_UP		33	-0.199075	-0.698677	0.899225	1	1	5275	tags=27%, list=26%, signal=37%
REACTOME_HOST_INTERACTIONS_OF_HIV_FACTORS	REACTOME_HOST_INTERACTIONS_OF_HIV_FACTORS		119	-0.167378	-0.696901	0.699597	1	1	6806	tags=34%, list=33%, signal=51%
KORKOLA_EMBRYONIC_CARCINOMA_VS_SEMINOMA_DN	KORKOLA_EMBRYONIC_CARCINOMA_VS_SEMINOMA_DN		25	-0.288138	-0.69687	0.949515	1	1	3332	tags=32%, list=16%, signal=38%
DARWICHE_PAPILLOMA_RISK_HIGH_DN	DARWICHE_PAPILLOMA_RISK_HIGH_DN		171	-0.165066	-0.695562	0.973085	1	1	4409	tags=22%, list=22%, signal=28%
RASHI_NFKB1_TARGETS	RASHI_NFKB1_TARGETS		19	-0.283004	-0.693812	0.759036	1	1	2638	tags=16%, list=13%, signal=18%
CREIGHTON_AKT1_SIGNALING_VIA_MTOR_DN	CREIGHTON_AKT1_SIGNALING_VIA_MTOR_DN		22	-0.243229	-0.692502	0.74538	1	1	8259	tags=64%, list=40%, signal=106%
KEGG_CYTOSOLIC_DNA_SENSING_PATHWAY	KEGG_CYTOSOLIC_DNA_SENSING_PATHWAY		55	-0.247077	-0.691632	0.829615	1	1	5554	tags=33%, list=27%, signal=45%
KEGG_GLYCOSYLPHOSPHATIDYLINOSITOL_GPI_ANCHOR_BIOSYNTHESIS	KEGG_GLYCOSYLPHOSPHATIDYLINOSITOL_GPI_ANCHOR_BIOSYNTHESIS		25	-0.210788	-0.691352	0.80315	1	1	7738	tags=48%, list=38%, signal=77%
TURASHVILI_BREAST_DUCTAL_CARCINOMA_VS_DUCTAL_NORMAL_DN	TURASHVILI_BREAST_DUCTAL_CARCINOMA_VS_DUCTAL_NORMAL_DN		187	-0.280466	-0.690591	0.79802	1	1	3771	tags=30%, list=18%, signal=37%
ODONNELL_TFRC_TARGETS_DN	ODONNELL_TFRC_TARGETS_DN		130	-0.259092	-0.690294	0.732218	1	1	5021	tags=29%, list=24%, signal=38%
BILANGES_SERUM_SENSITIVE_VIA_TSC1	BILANGES_SERUM_SENSITIVE_VIA_TSC1		23	-0.276959	-0.688997	0.869388	1	1	2754	tags=22%, list=13%, signal=25%
TUOMISTO_TUMOR_SUPPRESSION_BY_COL13A1_DN	TUOMISTO_TUMOR_SUPPRESSION_BY_COL13A1_DN		17	-0.290971	-0.687714	0.951219	1	1	5524	tags=29%, list=27%, signal=40%
RUAN_RESPONSE_TO_TNF_TROGLITAZONE_DN	RUAN_RESPONSE_TO_TNF_TROGLITAZONE_DN		42	-0.250569	-0.687456	0.820565	1	1	3328	tags=21%, list=16%, signal=26%
REACTOME_REGULATION_OF_HYPOXIA_INDUCIBLE_FACTOR_HIF_BY_OXYGEN	REACTOME_REGULATION_OF_HYPOXIA_INDUCIBLE_FACTOR_HIF_BY_OXYGEN		23	-0.214037	-0.687117	0.812749	1	1	5712	tags=30%, list=28%, signal=42%
LIU_NASOPHARYNGEAL_CARCINOMA	LIU_NASOPHARYNGEAL_CARCINOMA		66	-0.155955	-0.686708	0.844622	1	1	6856	tags=30%, list=33%, signal=45%
WORSCHECH_TUMOR_EVASION_AND_TOLEROGENICITY_UP	WORSCHECH_TUMOR_EVASION_AND_TOLEROGENICITY_UP		30	-0.328565	-0.686103	0.794411	1	1	4366	tags=40%, list=21%, signal=51%
WAMUNYOKOLI_OVARIAN_CANCER_LMP_UP	WAMUNYOKOLI_OVARIAN_CANCER_LMP_UP		260	-0.1636	-0.685582	0.840551	1	1	6724	tags=38%, list=33%, signal=55%
PID_BARD1_PATHWAY	PID_BARD1_PATHWAY		29	-0.24319	-0.684644	0.728778	1	1	3620	tags=21%, list=18%, signal=25%
REACTOME_PROTEIN_FOLDING	REACTOME_PROTEIN_FOLDING		49	-0.164993	-0.683946	0.845339	1	1	5525	tags=27%, list=27%, signal=36%
WILLIAMS_ESR1_TARGETS_UP	WILLIAMS_ESR1_TARGETS_UP		25	-0.271531	-0.682165	0.88664	1	1	4162	tags=36%, list=20%, signal=45%
REACTOME_ACTIVATED_AMPK_STIMULATES_FATTY_ACID_OXIDATION_IN_MUSCLE	REACTOME_ACTIVATED_AMPK_STIMULATES_FATTY_ACID_OXIDATION_IN_MUSCLE		18	-0.218056	-0.682084	0.904943	1	1	558	tags=6%, list=3%, signal=6%
NIKOLSKY_BREAST_CANCER_20Q12_Q13_AMPLICON	NIKOLSKY_BREAST_CANCER_20Q12_Q13_AMPLICON		144	-0.206543	-0.68193	0.92955	1	1	3844	tags=22%, list=19%, signal=26%
JIANG_AGING_HYPOTHALAMUS_DN	JIANG_AGING_HYPOTHALAMUS_DN		40	-0.180399	-0.681275	0.840237	1	1	603	tags=5%, list=3%, signal=5%
ZHANG_TLX_TARGETS_DN	ZHANG_TLX_TARGETS_DN		85	-0.289997	-0.679867	0.731092	1	1	7471	tags=41%, list=36%, signal=65%
REACTOME_SHC1_EVENTS_IN_ERBB4_SIGNALING	REACTOME_SHC1_EVENTS_IN_ERBB4_SIGNALING		20	-0.228908	-0.679593	0.873469	1	1	1437	tags=10%, list=7%, signal=11%
TARTE_PLASMA_CELL_VS_PLASMABLAST_DN	TARTE_PLASMA_CELL_VS_PLASMABLAST_DN		305	-0.183814	-0.679394	0.731313	1	1	6994	tags=38%, list=34%, signal=57%
FLORIO_HUMAN_NEOCORTEX	FLORIO_HUMAN_NEOCORTEX		30	-0.271811	-0.678767	0.972868	1	1	2180	tags=20%, list=11%, signal=22%
MIKKELSEN_IPS_LCP_WITH_H3K4ME3	MIKKELSEN_IPS_LCP_WITH_H3K4ME3		167	-0.215781	-0.678556	0.984064	1	1	3520	tags=23%, list=17%, signal=27%
SENGUPTA_NASOPHARYNGEAL_CARCINOMA_WITH_LMP1_DN	SENGUPTA_NASOPHARYNGEAL_CARCINOMA_WITH_LMP1_DN		165	-0.258163	-0.677242	0.967871	1	1	2641	tags=23%, list=13%, signal=26%
REACTOME_ACTIVATION_OF_NF_KAPPAB_IN_B_CELLS	REACTOME_ACTIVATION_OF_NF_KAPPAB_IN_B_CELLS		61	-0.178854	-0.676176	0.769539	1	1	7969	tags=48%, list=39%, signal=78%
KEGG_PRIMARY_BILE_ACID_BIOSYNTHESIS	KEGG_PRIMARY_BILE_ACID_BIOSYNTHESIS		16	-0.282127	-0.675791	0.931864	1	1	682	tags=13%, list=3%, signal=13%
KEGG_GLYCINE_SERINE_AND_THREONINE_METABOLISM	KEGG_GLYCINE_SERINE_AND_THREONINE_METABOLISM		31	-0.253267	-0.675717	0.967413	1	1	4454	tags=29%, list=22%, signal=37%
SHEPARD_BMYB_TARGETS	SHEPARD_BMYB_TARGETS		72	-0.24521	-0.674483	0.843496	1	1	4031	tags=28%, list=20%, signal=34%
[truncated: 142 more rows]
