# Supplementary material for: Long non-coding RNA, LINC01614 as a potential biomarker for prognostic prediction in breast cancer
Source: PeerJ journal article supplement (doi:10.7717/peerj.7976), 2019-11-14

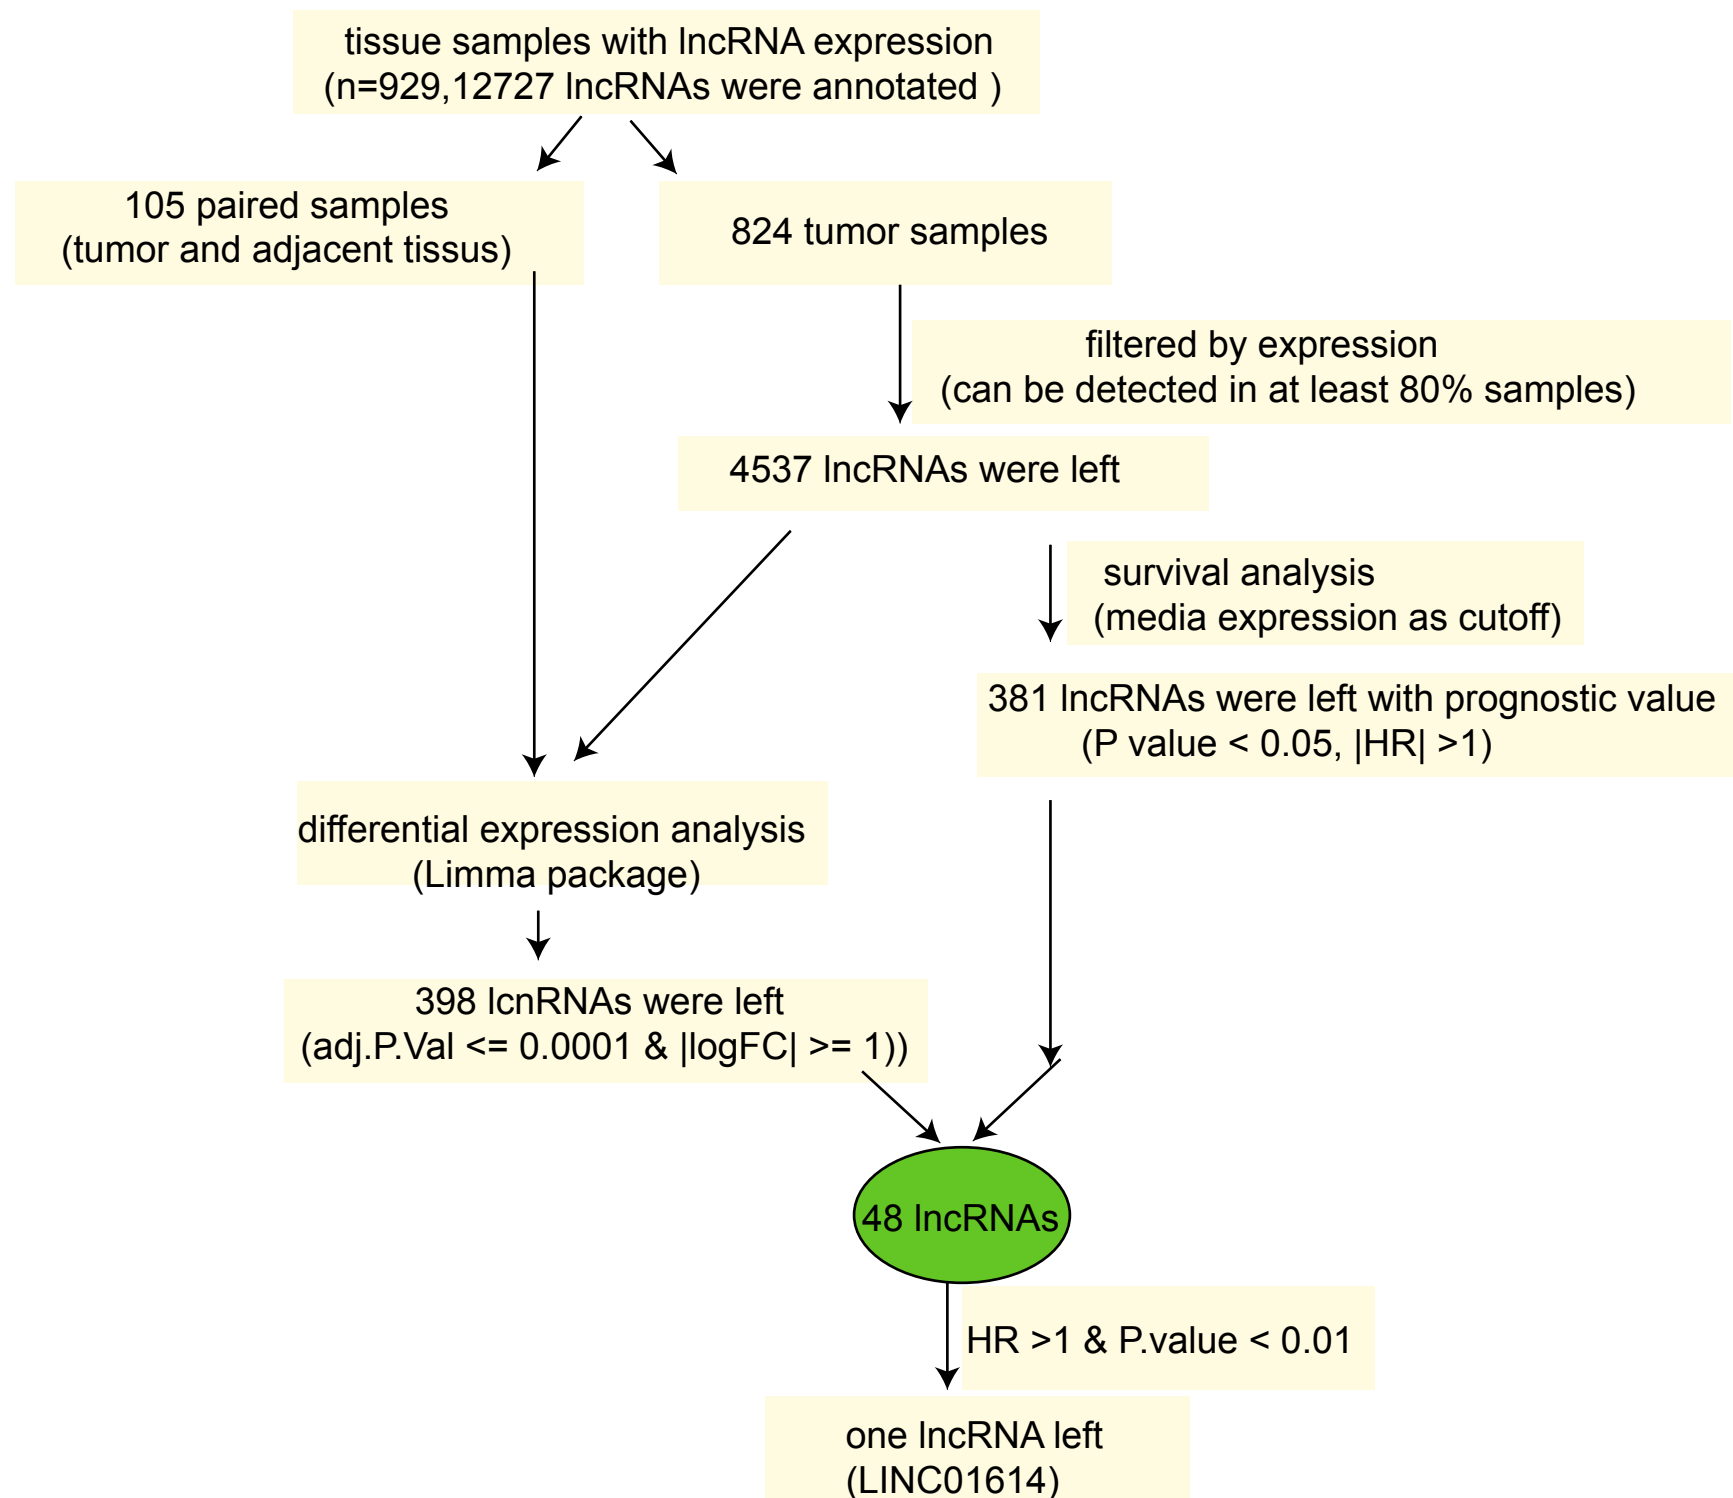

Supplement: Supplementary_Figure_1.pdf [file Supplementary_Figure_1.pdf]
